# Supplementary material for: γ-Selective directed catalytic asymmetric hydroboration of 1,1-disubstituted alkenes
Source: Royal Society of Chemistry journal article supplement (doi:10.1039/c2cc36199j), 2012-01-01

Supporting Information for:

**$\gamma$ -Selective Directed Catalytic Asymmetric Hydroboration of 1,1-Disubstituted Alkenes.**

Sean M. Smith, Gia L. Hoang, Rhitankar Pal, Mohammad O. Bani Khaled, Liberty S. W. Pelter, Xiao Cheng Zeng, and James M.

Takacs\*

Department of Chemistry, University of Nebraska-Lincoln, Lincoln, NE 68588-0304

Department of Chemistry and Physics, Purdue University Calumet, Hammond, IN 46323-2094

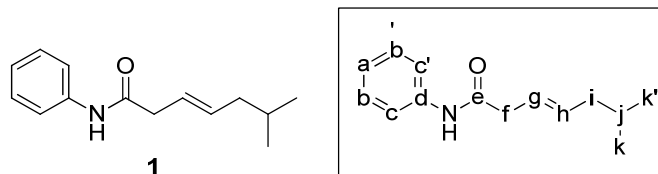

Following the amidation procedure with EDCI affords, after flash chromatography on silica gel (90:10 hexanes:ethyl acetate), the title compound (70%) as a light brown solid.

|                                                                             |                                                                                                                                                                                                                                                                               |
|-----------------------------------------------------------------------------|-------------------------------------------------------------------------------------------------------------------------------------------------------------------------------------------------------------------------------------------------------------------------------|
| <b>m.p.</b>                                                                 | 87–88.5 °C                                                                                                                                                                                                                                                                    |
| <b>TLC analysis</b>                                                         | $R_f$ 0.5 (75:25 hexanes:ethyl acetate)                                                                                                                                                                                                                                       |
| <b><math>^1\text{H}</math> NMR (400 MHz, <math>\text{CDCl}_3</math>)</b>    | $\delta$ 7.52 (2H, d, $J$ = 8.3 Hz, c,c') 7.44 (1H, br s, NH), 7.34 (2H, t, $J$ = 7.7 Hz, b,b'), 7.13 (1H, t, $J$ = 7.4 Hz, a), 5.80-5.55 (2H, m, g,h), 3.15 (2H, d, $J$ = 6.9 Hz, f), 2.04 (2H, t, $J$ = 6.8 Hz, i), 1.80-1.60 (1H, m, j), 0.96 (6H, d, $J$ = 6.6 Hz, k,k'). |
| <b><math>^{13}\text{C}</math> NMR (100 MHz, <math>\text{CDCl}_3</math>)</b> | $\delta$ 169.39 (e), 137.79 (d), 136.53 (g), 129.02 (b,b'), 124.31 (a), 123.41 (h), 119.61 (c,c'), 41.93 (f), 41.73 (i), 28.25 (j), 22.35 (k,k').                                                                                                                             |
| <b>IR (neat)</b>                                                            | 3244 (N-H stretch), 2952, 1654 (C=O stretch), 1595, 1544 (N-H bend), 1443, 1247 (C-N stretch), 1187, 967, 843, 756 $\text{cm}^{-1}$ .                                                                                                                                         |
| <b>HRMS (FAB)</b>                                                           | Calcd. for $\text{C}_{14}\text{H}_{20}\text{NO}$ (M+H): 218.1545, found 218.1541 $m/z$ .                                                                                                                                                                                      |

**<sup>1</sup>H NMR of 1**

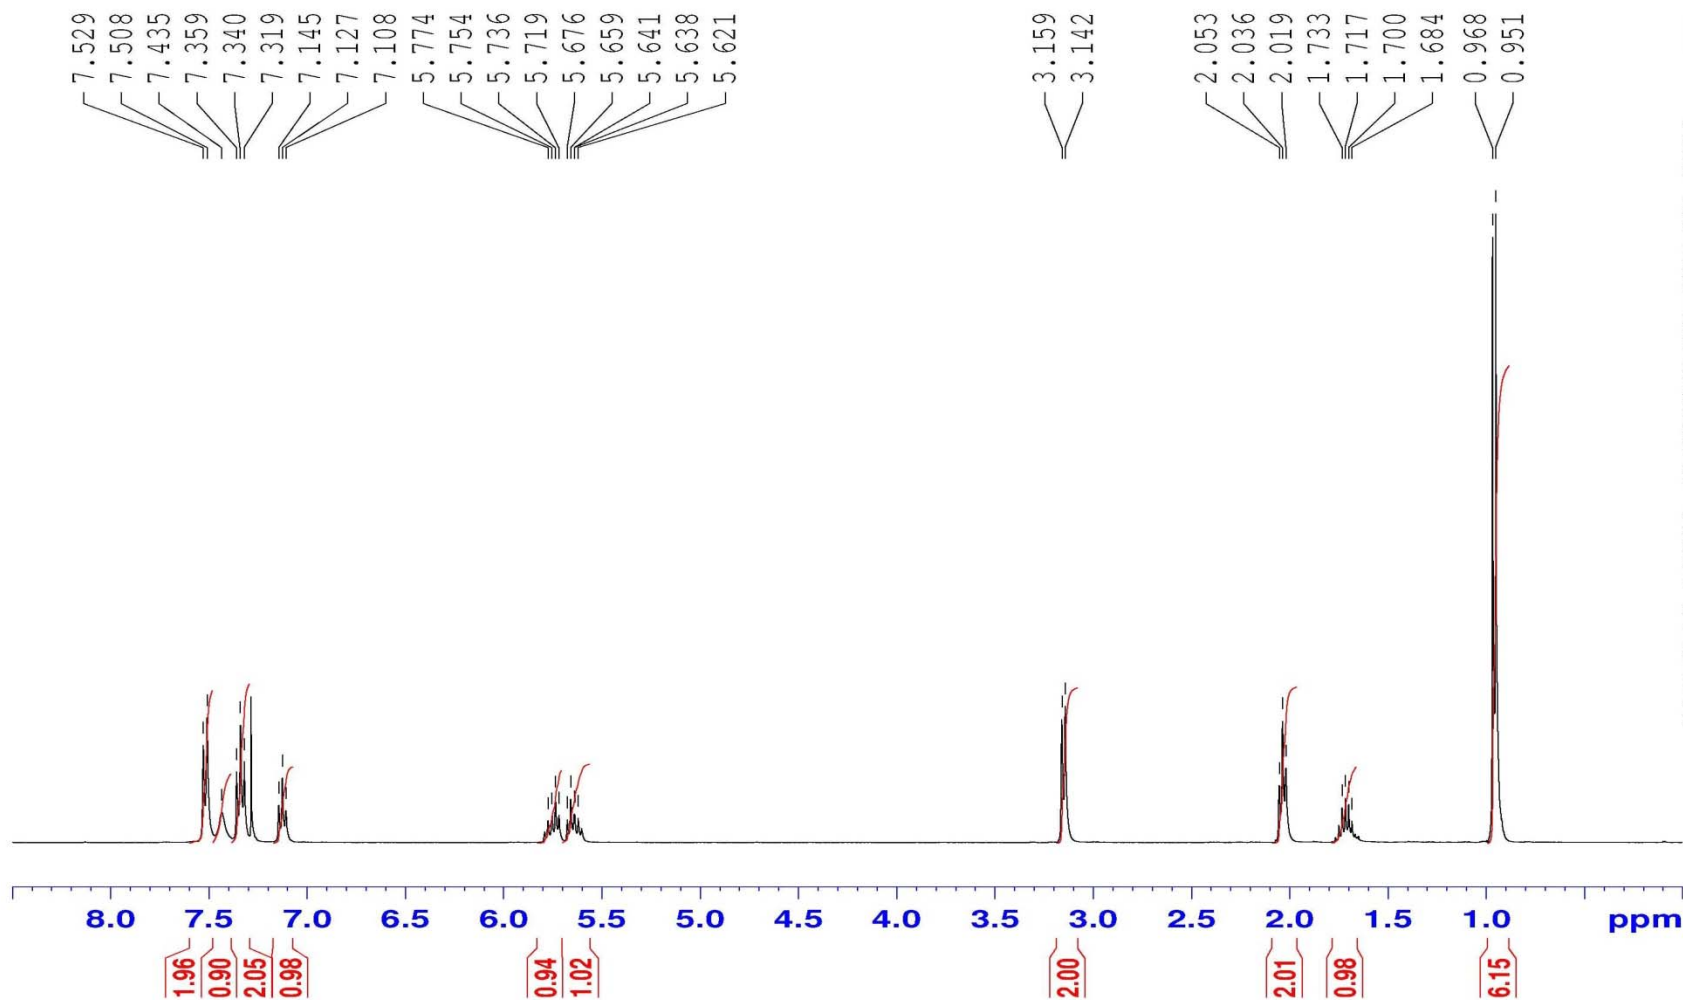

<sup>13</sup>C NMR of **1**

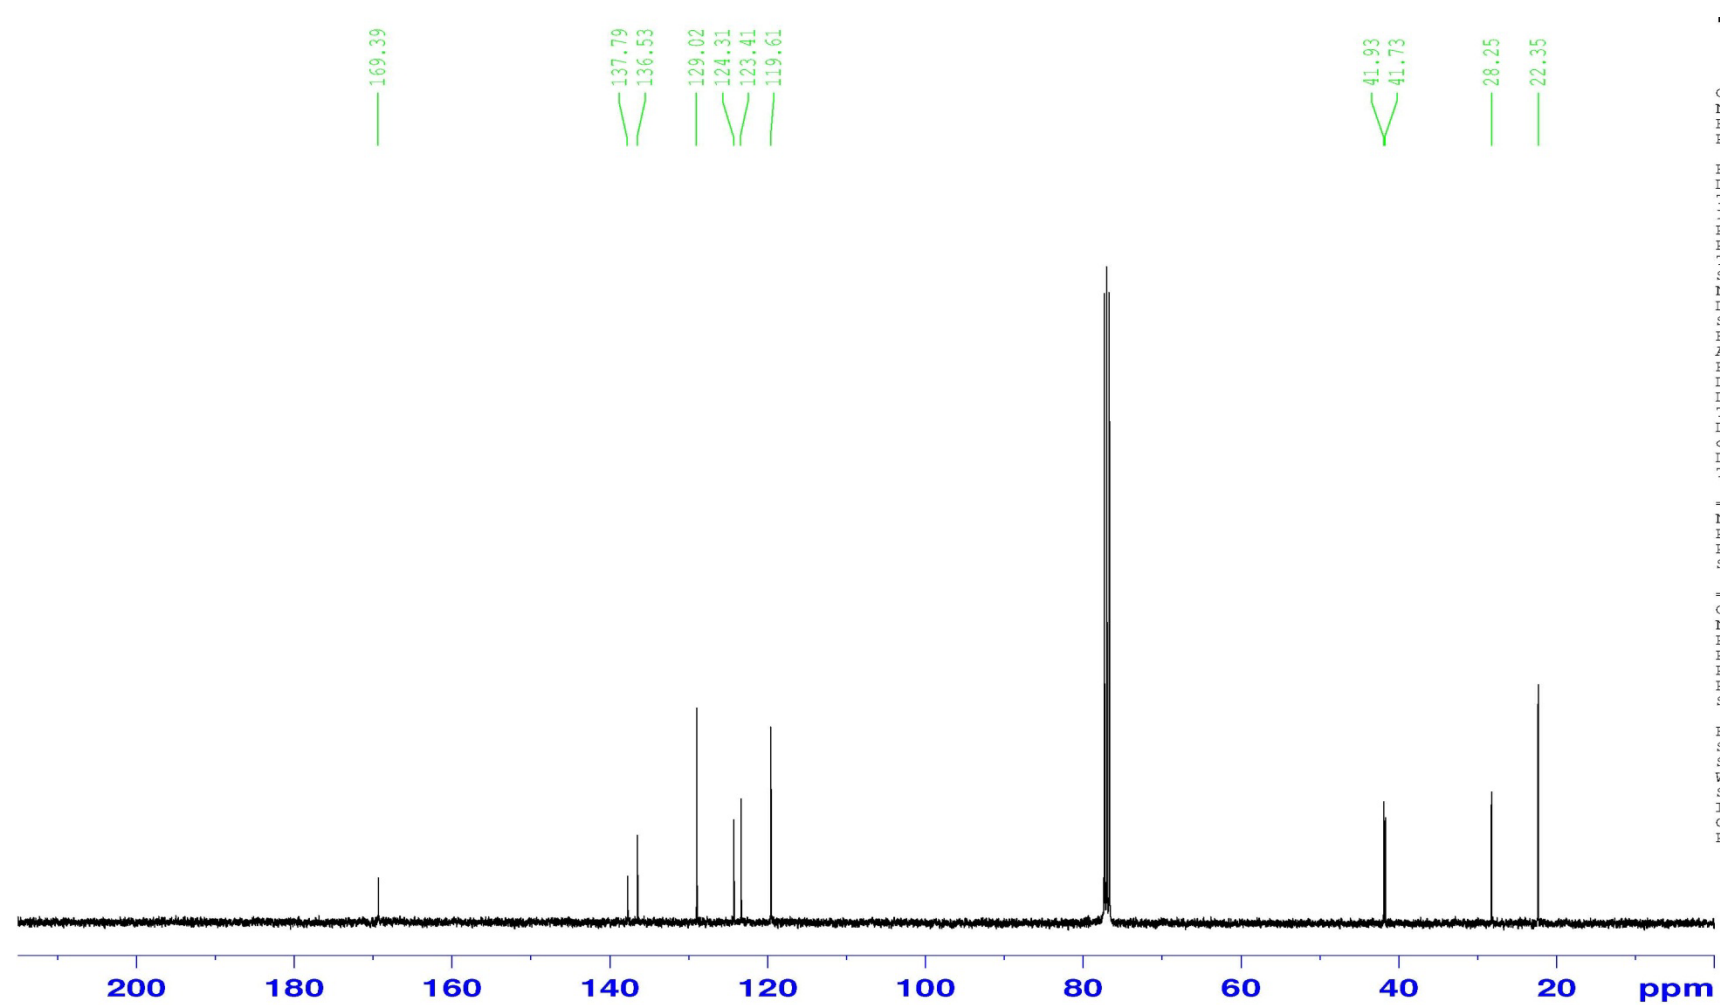



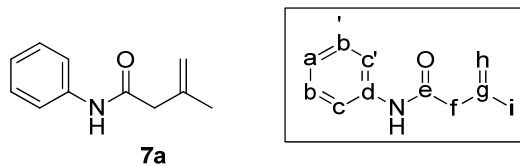

Following the general amidation procedure with DCC affords, after flash chromatography on silica gel (85–75:15–25 hexanes:ethyl acetate), the title compound (65%) as a white solid.

|                                                       |                                                                                                                                                                                                        |
|-------------------------------------------------------|--------------------------------------------------------------------------------------------------------------------------------------------------------------------------------------------------------|
| <b>m.p.</b>                                           | 97.5–99.5 °C                                                                                                                                                                                           |
| <b>TLC analysis</b>                                   | <i>R<sub>f</sub></i> 0.3 (75:25 hexanes:ethyl acetate)                                                                                                                                                 |
| <b><sup>1</sup>H NMR (400 MHz, CDCl<sub>3</sub>)</b>  | δ 7.65 (1H, br s, NH), 7.53 (2H, d, <i>J</i> = 8.0 Hz, c,c'), 7.33 (2H, t, <i>J</i> = 7.6 Hz, b,b'), 7.13 (1H, t, <i>J</i> = 7.2 Hz, a), 5.09 and 5.02 (2H, s's, h), 3.15 (2H, s, f), 1.88 (3H, s, i). |
| <b><sup>13</sup>C NMR (100 MHz, CDCl<sub>3</sub>)</b> | δ 168.58 (e), 140.35 (d), 137.80 (g), 128.98 (b,b'), 124.36 (a), 119.79 (c,c'), 116.09 (h), 47.41 (f), 22.46 (i).                                                                                      |
| <b>IR (neat)</b>                                      | 3291 (N-H stretch), 3060, 2953, 2921, 2865, 1657 (C=O stretch), 1638, 1595, 1525 (N-H bend), 1440, 1307, 1251 (C-N stretch), 1162, 869, 738, 688, 617 cm <sup>-1</sup> .                               |

**<sup>1</sup>H NMR of 7a**

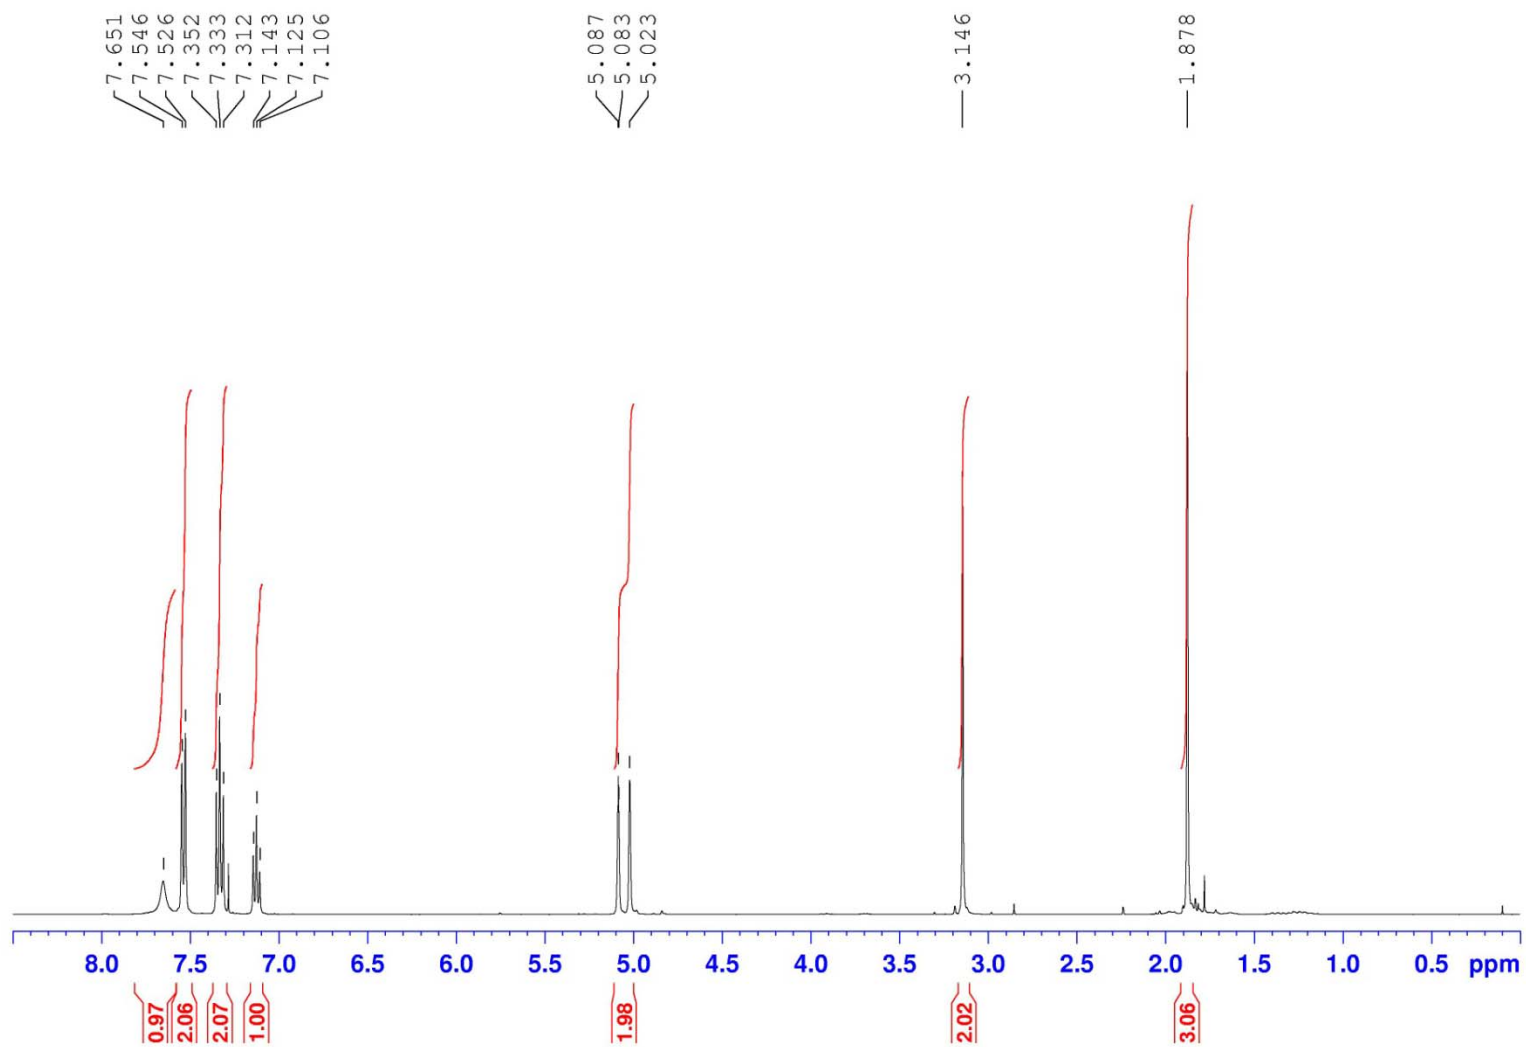

**<sup>13</sup>C NMR of 7a**

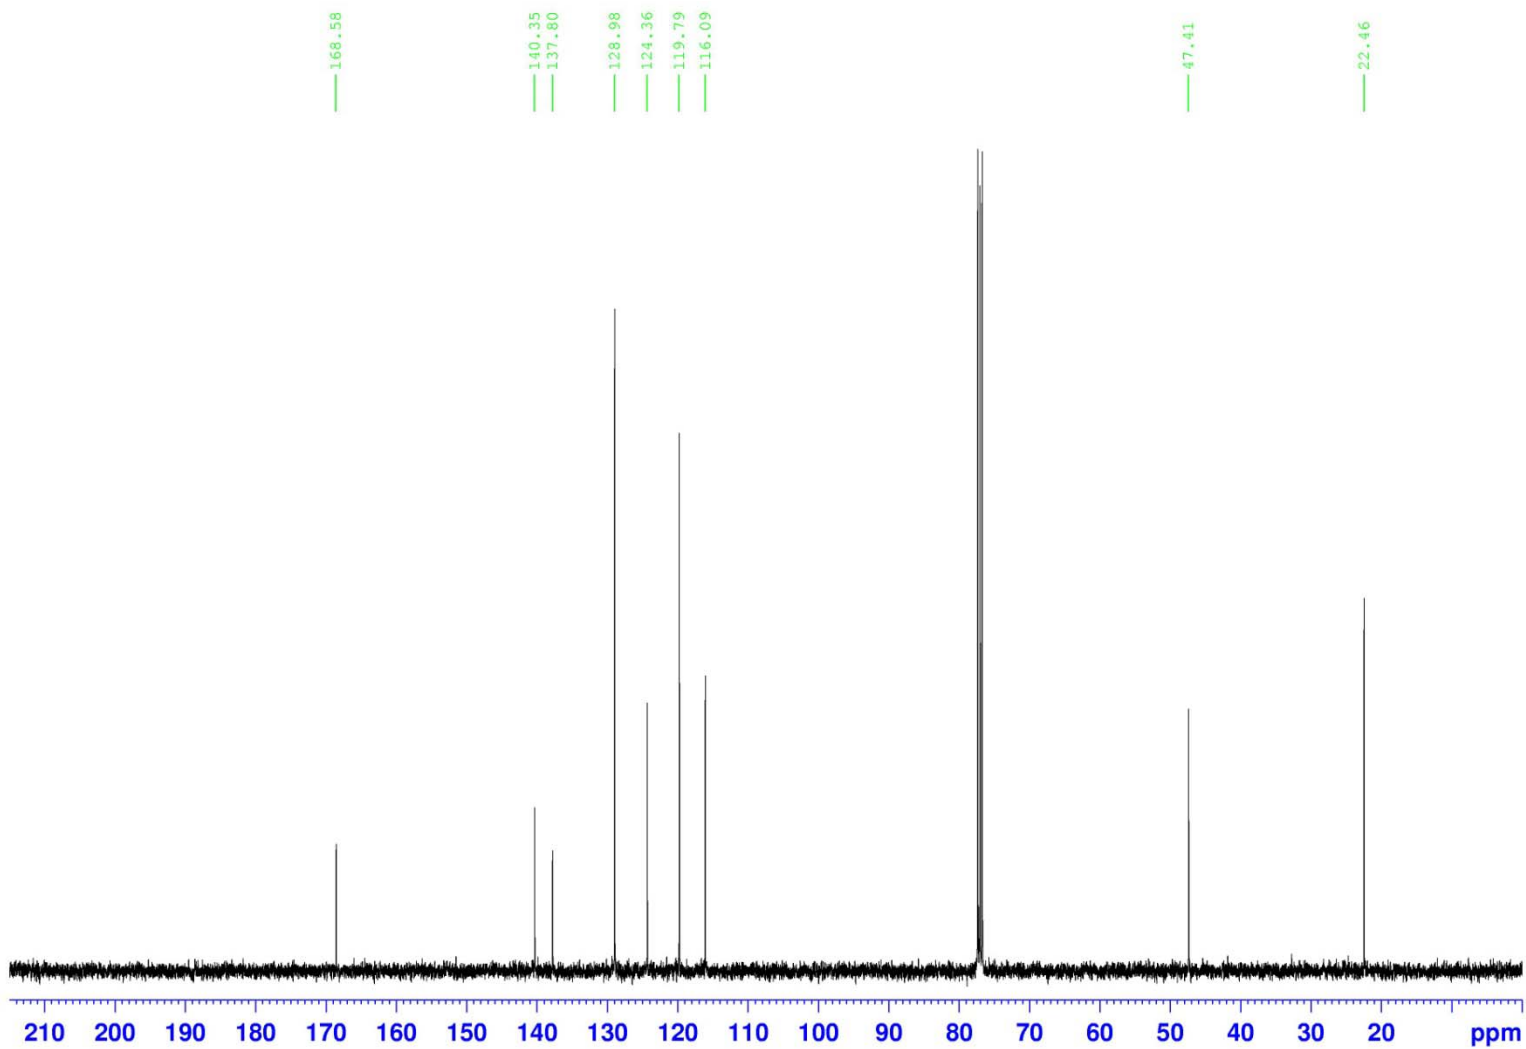

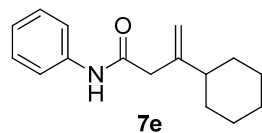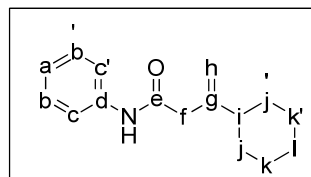

Following the general carbonylation-hydrolysis-amidation procedure affords, after flash chromatography on silica gel (85–75:15–25 hexanes:ethyl acetate), the title compound (39%, 3 steps) as a white solid.

|                                                      |                                                                                                                                                                                                                                                                                  |
|------------------------------------------------------|----------------------------------------------------------------------------------------------------------------------------------------------------------------------------------------------------------------------------------------------------------------------------------|
| <b>m.p.</b>                                          | 81–83 °C                                                                                                                                                                                                                                                                         |
| <b>TLC analysis</b>                                  | $R_f$ 0.4 (75:25 hexanes:ethyl acetate)                                                                                                                                                                                                                                          |
| <b><sup>1</sup>H NMR (300 MHz, CDCl<sub>3</sub>)</b> | δ 7.62 (1H, br s, NH), 7.51 (2H, d, $J$ = 7.8 Hz, c,c'), 7.34 (2H, t, $J$ = 8.1 Hz, b,b'), 7.12 (1H, t, $J$ = 7.5 Hz, a), 5.15 and 5.06 (2H, s's, h), 3.19 (2H, s, f), 2.05–1.95 (1H, m, i), 1.90–1.75 (4H, m, k,k',l,j), 1.75–1.65 (1H, m, j'), 1.30–1.10 (5H, m, j,j',k,k',l). |
| <b><sup>13</sup>C NMR (75 MHz, CDCl<sub>3</sub>)</b> | δ 168.85 (e), 150.39 (d), 137.72 (g), 129.00 (b,b'), 124.31 (a), 119.65 (c,c'), 113.79 (h), 44.06 (i), 44.42 (f), 32.18 (j,j'), 26.48 (k,k'), 26.09 (l).                                                                                                                         |
| <b>IR (neat)</b>                                     | 3330 (N-H stretch), 2921, 2848, 1665 (C=O stretch), 1596, 1514 (N-H bend), 1436, 1346, 1245 (C-N stretch), 1167, 956, 905, 749, 691, 586 cm <sup>-1</sup> .                                                                                                                      |
| <b>HRMS (ESI)</b>                                    | Calcd. for C <sub>16</sub> H <sub>21</sub> NaNO (M+Na): 266.1521, found 266.1526 $m/z$ ..                                                                                                                                                                                        |

**<sup>1</sup>H NMR of 7e**

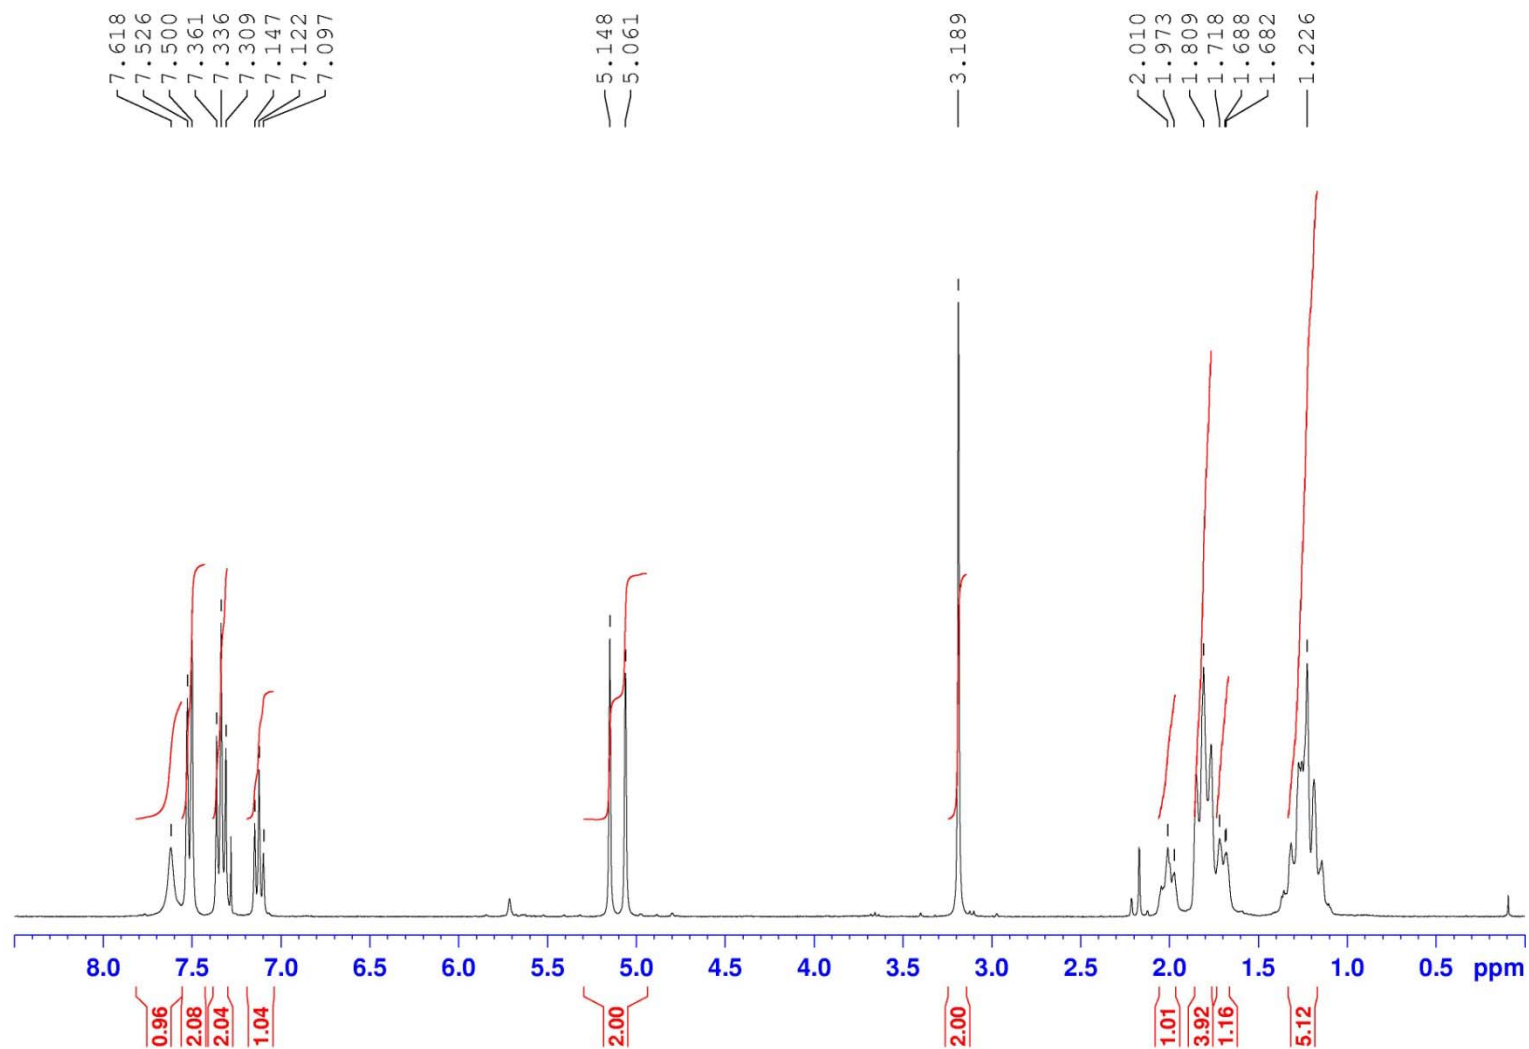

<sup>13</sup>C NMR of 7e

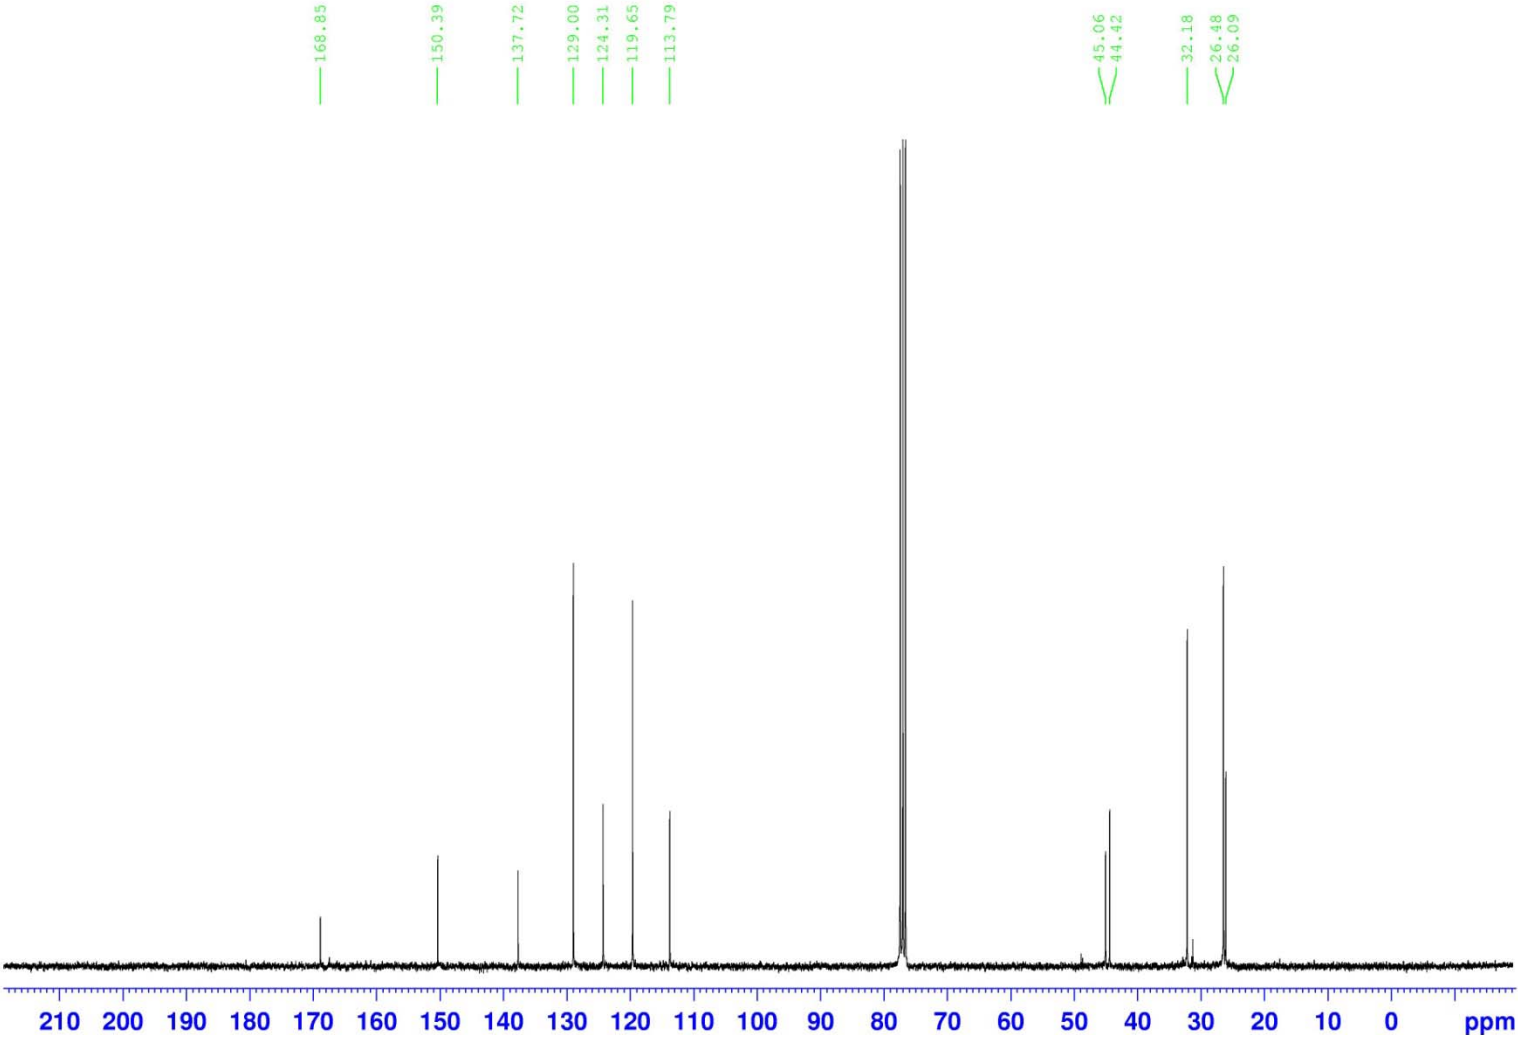

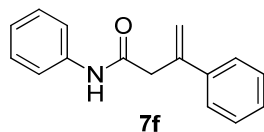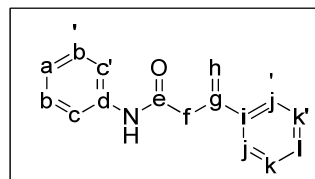

Following the general carbonylation-hydrolysis-amidation procedure affords, after flash chromatography on silica gel (85–75:15–25 hexanes:ethyl acetate), the title compound (18%, 3 steps) as a white solid.

|                                                                            |                                                                                                                                                                                |
|----------------------------------------------------------------------------|--------------------------------------------------------------------------------------------------------------------------------------------------------------------------------|
| <b>m.p.</b>                                                                | 90.5–93.5 °C                                                                                                                                                                   |
| <b>TLC analysis</b>                                                        | $R_f$ 0.4 (75:25 hexanes:ethyl acetate)                                                                                                                                        |
| <b><math>^1\text{H}</math> NMR (300 MHz, <math>\text{CDCl}_3</math>)</b>   | $\delta$ 7.60–7.50 (3H, m, j,j',NH), 7.45–7.35 (5H, m, c,c',k,k',l), 7.35–7.25 (2H, m, b,b'), 7.10 (1H, t, $J$ = 7.5 Hz, a), 5.78 and 5.41 (2H, s's, h), 3.65 (2H, s, f).      |
| <b><math>^{13}\text{C}</math> NMR (75 MHz, <math>\text{CDCl}_3</math>)</b> | $\delta$ 168.35 (e), 142.08 (d), 138.76 (i), 137.61 (g), 128.94 (b,b'), 128.82 (j,j'), 128.47 (l), 125.78 (k,k'), 124.43 (a), 119.84 (c,c'), 117.44 (h), 45.14 (f).            |
| <b>IR (neat)</b>                                                           | 3248 (N-H stretch), 3192, 3135, 3085, 2929, 1804, 1656 (C=O stretch), 1597, 1554 (N-H bend), 1484, 1441, 1338, 1232 (C-N stretch), 1162. 896, 770, 752, 688 $\text{cm}^{-1}$ . |

**<sup>1</sup>H NMR of 7f**

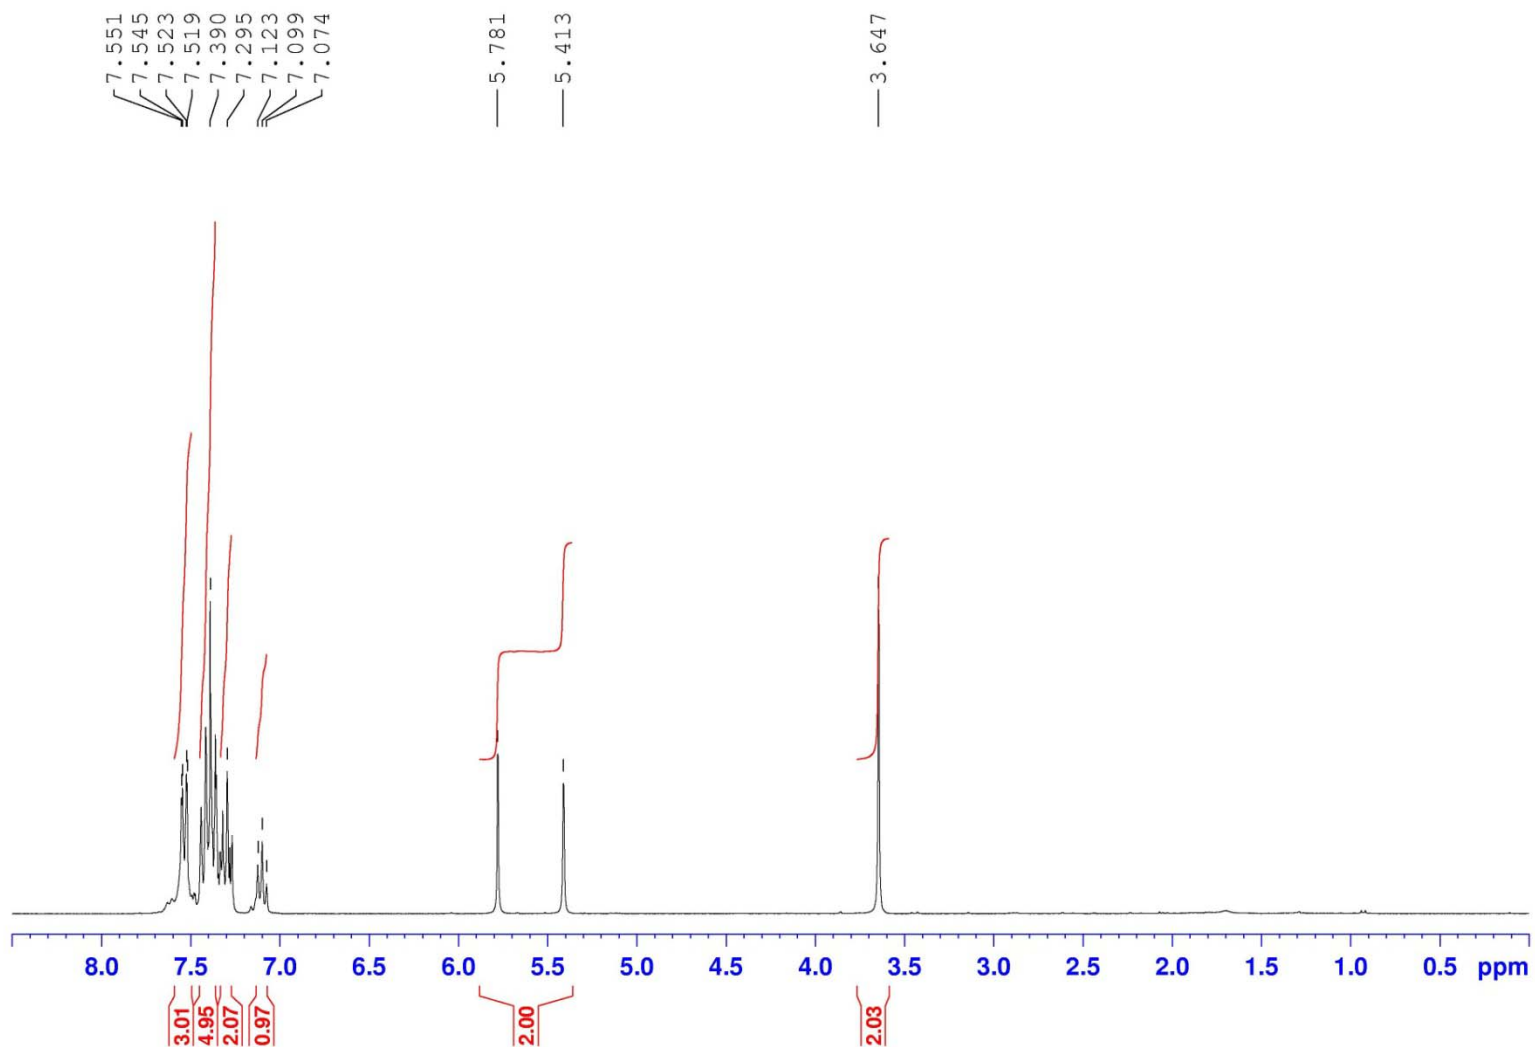



**<sup>13</sup>C NMR of 7f**

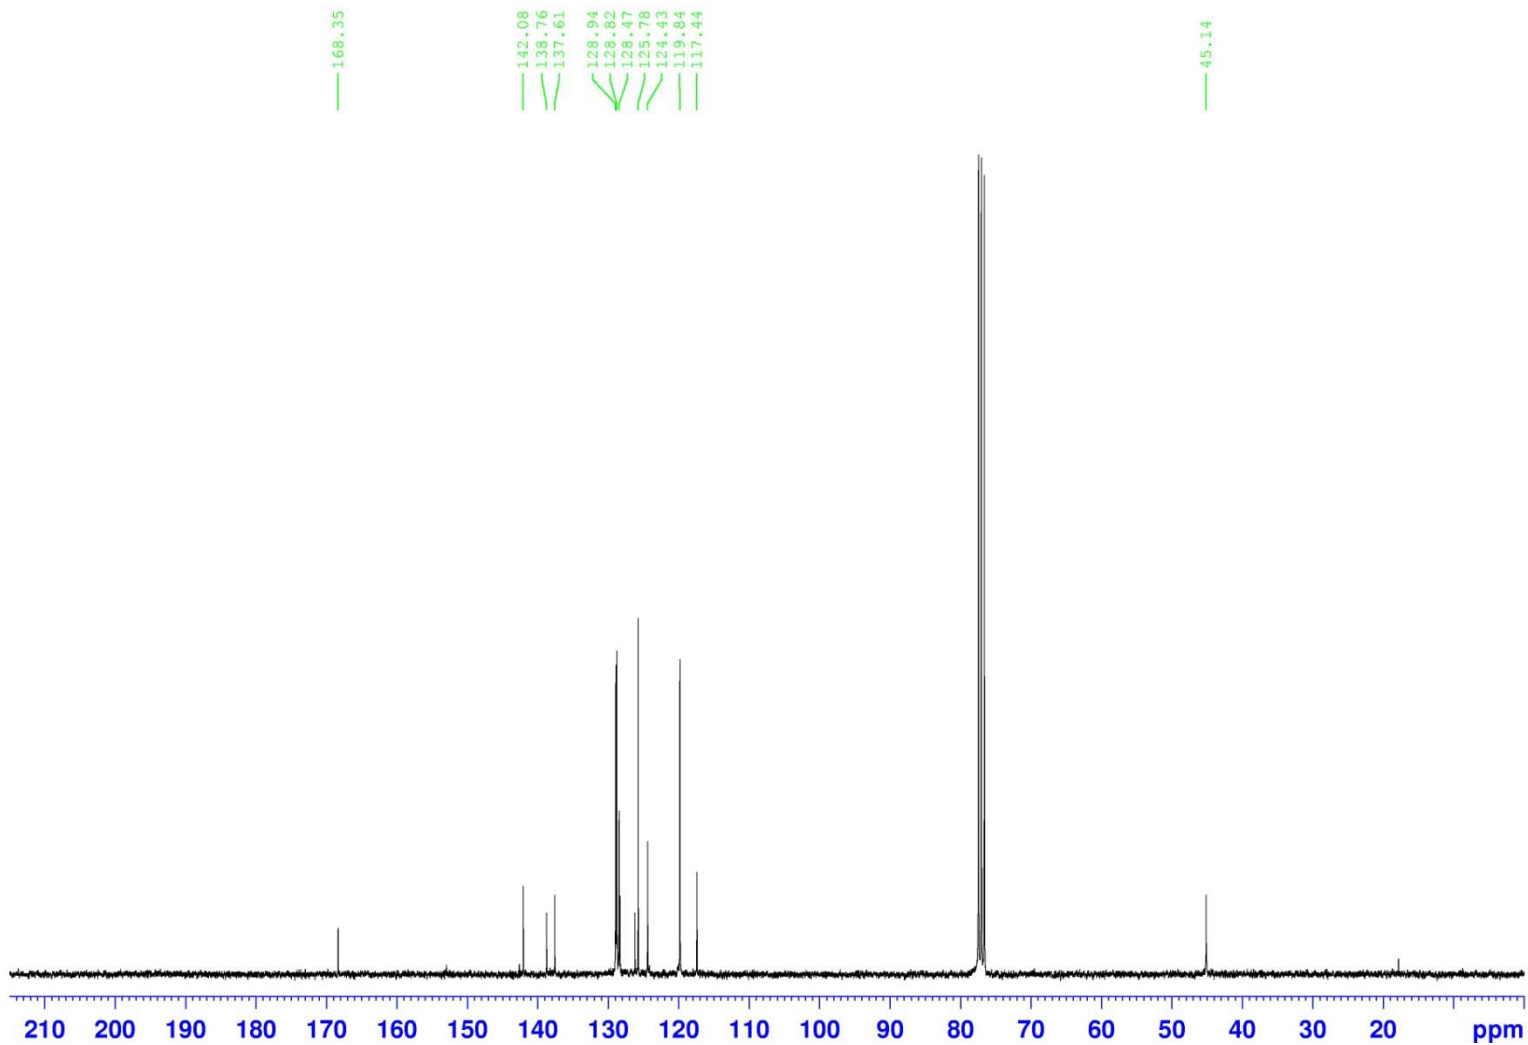

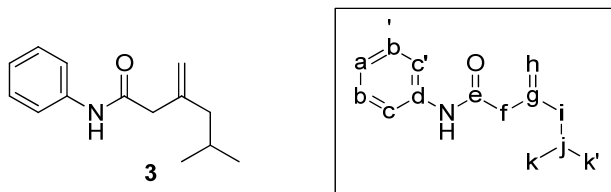

Following the general procedure for hydrolysis of *tert*-butyl esters proceeded by amidation affords, after flash chromatography on silica gel (85–75:15–25 hexanes:ethyl acetate), the title compound (63%, 2 steps) as a white solid.

|                                                      |                                                                                                                                                                                                                                                               |
|------------------------------------------------------|---------------------------------------------------------------------------------------------------------------------------------------------------------------------------------------------------------------------------------------------------------------|
| <b>m.p.</b>                                          | 91–92.5 °C                                                                                                                                                                                                                                                    |
| <b>TLC analysis</b>                                  | $R_f$ 0.4 (75:25 hexanes:ethyl acetate)                                                                                                                                                                                                                       |
| <b><sup>1</sup>H NMR (300 MHz, CDCl<sub>3</sub>)</b> | δ 7.87 (1H, br s, NH), 7.53 (2H, d, $J$ = 8.1 Hz, c,c'), 7.32 (2H, t, $J$ = 8.1 Hz, b,b'), 7.11 (1H, t, $J$ = 7.5 Hz, a), 5.09 and 5.06 (2H, s's, h), 3.13 (2H, s, f), 2.02 (2H, d, $J$ = 6.9 Hz, i), 1.90–1.75 (1H, m, j), 0.91 (6H, d, $J$ = 6.6 Hz, k,k'). |
| <b><sup>13</sup>C NMR (75 MHz, CDCl<sub>3</sub>)</b> | δ 168.92 (e), 143.29(d), 137.90 (g), 128.94 (b,b'), 124.30 (a), 119.84 (c,c'), 116.17 (h), 45.67 (f), 45.63 (j), 25.96 (i), 22.41 (k,k').                                                                                                                     |
| <b>IR (neat)</b>                                     | 3290 (N-H stretch), 2953, 2921, 2865, 1657 (C=O stretch), 1638, 1595, 1530 (N-H bend), 1440, 1393, 1307, 1295, 1251 (C-N stretch), 1223, 1162, 1120, 996, 869, 738, 668, 617 cm <sup>-1</sup> .                                                               |
| <b>HRMS (CI)</b>                                     | Calcd. for C <sub>14</sub> H <sub>20</sub> NO (M+H): 218.1545, found 218.1539 $m/z$ .                                                                                                                                                                         |

**<sup>1</sup>H NMR of 3**

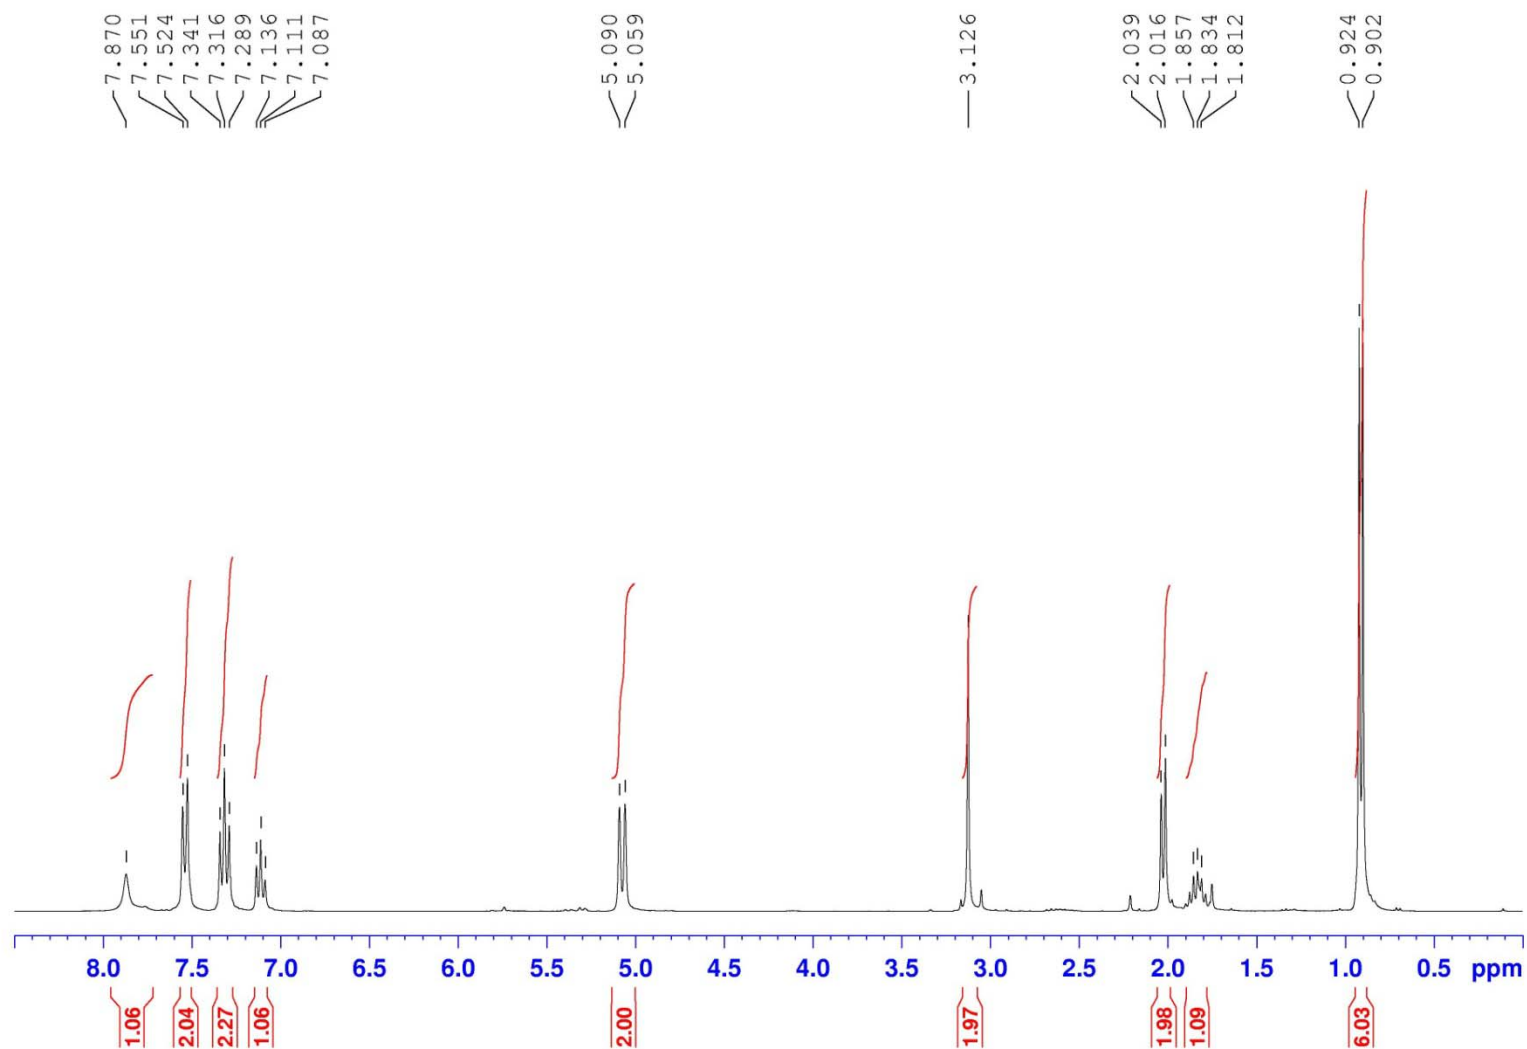

**$^{13}\text{C}$  NMR of 3**

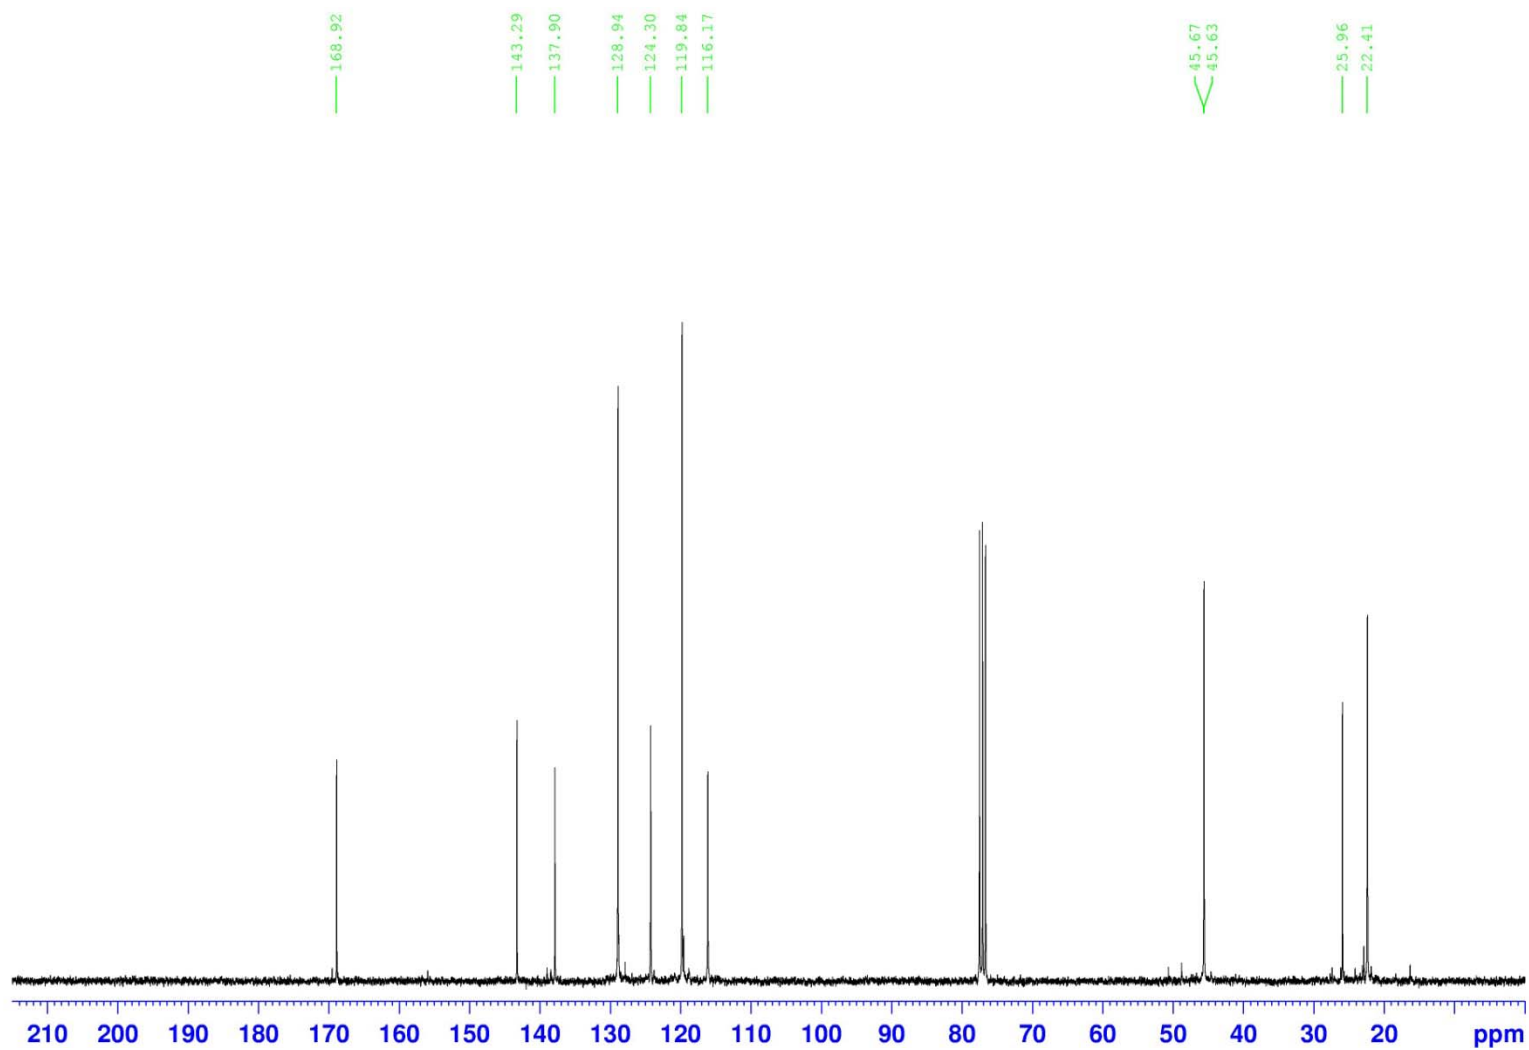

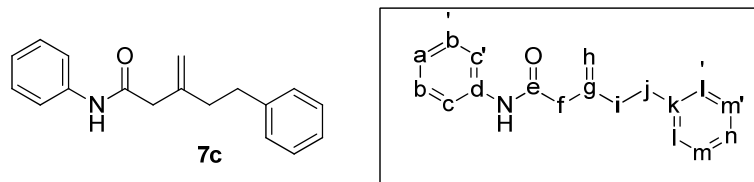

Following the general procedure for hydrolysis of *tert*-butyl esters proceeded by amidation affords, after flash chromatography on silica gel (85–75:15–25 hexanes:ethyl acetate), the title compound (61%, 2 steps) as a white solid.

|                                                                             |                                                                                                                                                                                                                                                                       |
|-----------------------------------------------------------------------------|-----------------------------------------------------------------------------------------------------------------------------------------------------------------------------------------------------------------------------------------------------------------------|
| <b>m.p.</b>                                                                 | 79–80 °C                                                                                                                                                                                                                                                              |
| <b>TLC analysis</b>                                                         | $R_f$ 0.4 (75:25 hexanes:ethyl acetate)                                                                                                                                                                                                                               |
| <b><math>^1\text{H}</math> NMR (400 MHz, <math>\text{CDCl}_3</math>)</b>    | $\delta$ 7.48 (2H, d, $J$ = 8.0 Hz, l,l'), 7.40–7.30 (3H, m, c,c', NH), 7.30–7.25 (2H, m, b,b'), 7.25–7.20 (3H, m, m,m',n), 7.14 (1H, t, $J$ = 6.8 Hz, a), 5.16 and 5.12 (2H, s's, h), 3.19 (2H, s, f), 2.86 (2H, t, $J$ = 8.0 Hz, j), 2.50 (2H, t, $J$ = 8.4 Hz, i). |
| <b><math>^{13}\text{C}</math> NMR (100 MHz, <math>\text{CDCl}_3</math>)</b> | $\delta$ 168.31 (e), 143.69 (d), 141.21 (k), 137.66 (g), 128.99 (b,b'), 128.44 (l,l'), 128.35 (m,m'), 126.06 (n), 124.38 (a), 119.69 (c,c'), 115.75 (h), 46.25 (f), 37.44 (i), 33.91 (j).                                                                             |
| <b>IR (neat)</b>                                                            | 3237 (N-H stretch), 3185, 3061, 3025, 1652 (C=O stretch), 1596, 1541 (N-H bend), 1469, 1443, 1398, 1346, 1247 (C-N stretch), 1193, 961, 897, 747, 694, 616 $\text{cm}^{-1}$ .                                                                                         |
| <b>HRMS (EI)</b>                                                            | Calcd. for $\text{C}_{19}\text{H}_{21}\text{NO}$ : 279.1623, found 279.1649 $m/z$ .                                                                                                                                                                                   |

**<sup>1</sup>H NMR of 7c**

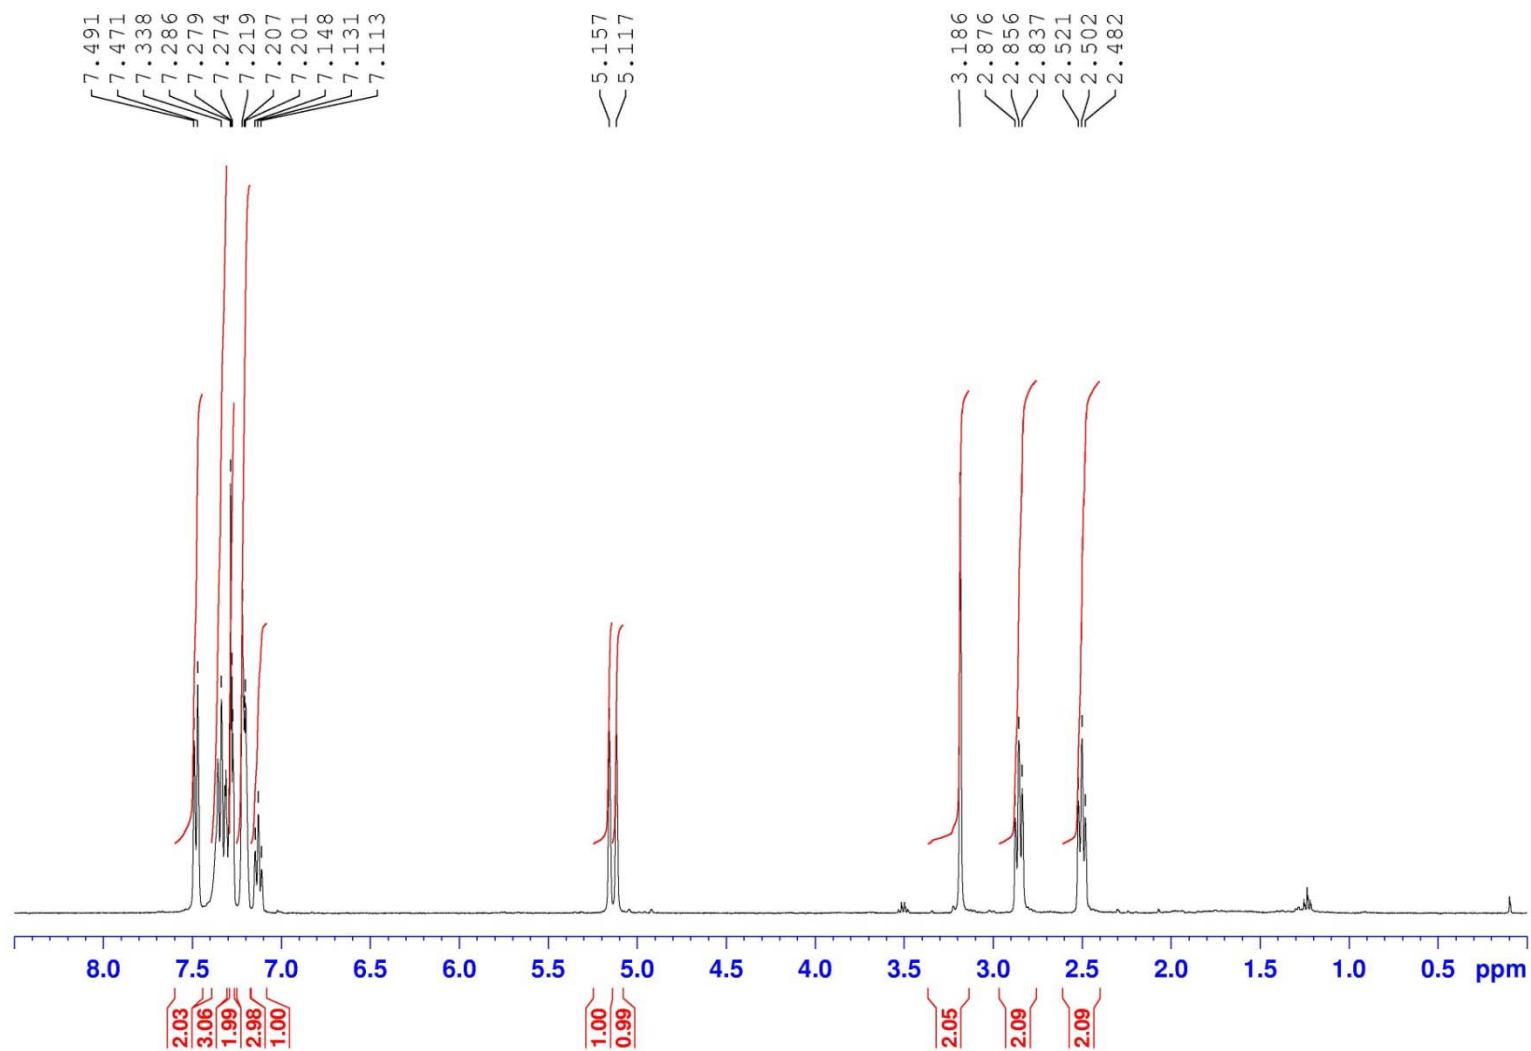

<sup>13</sup>C NMR of 7c

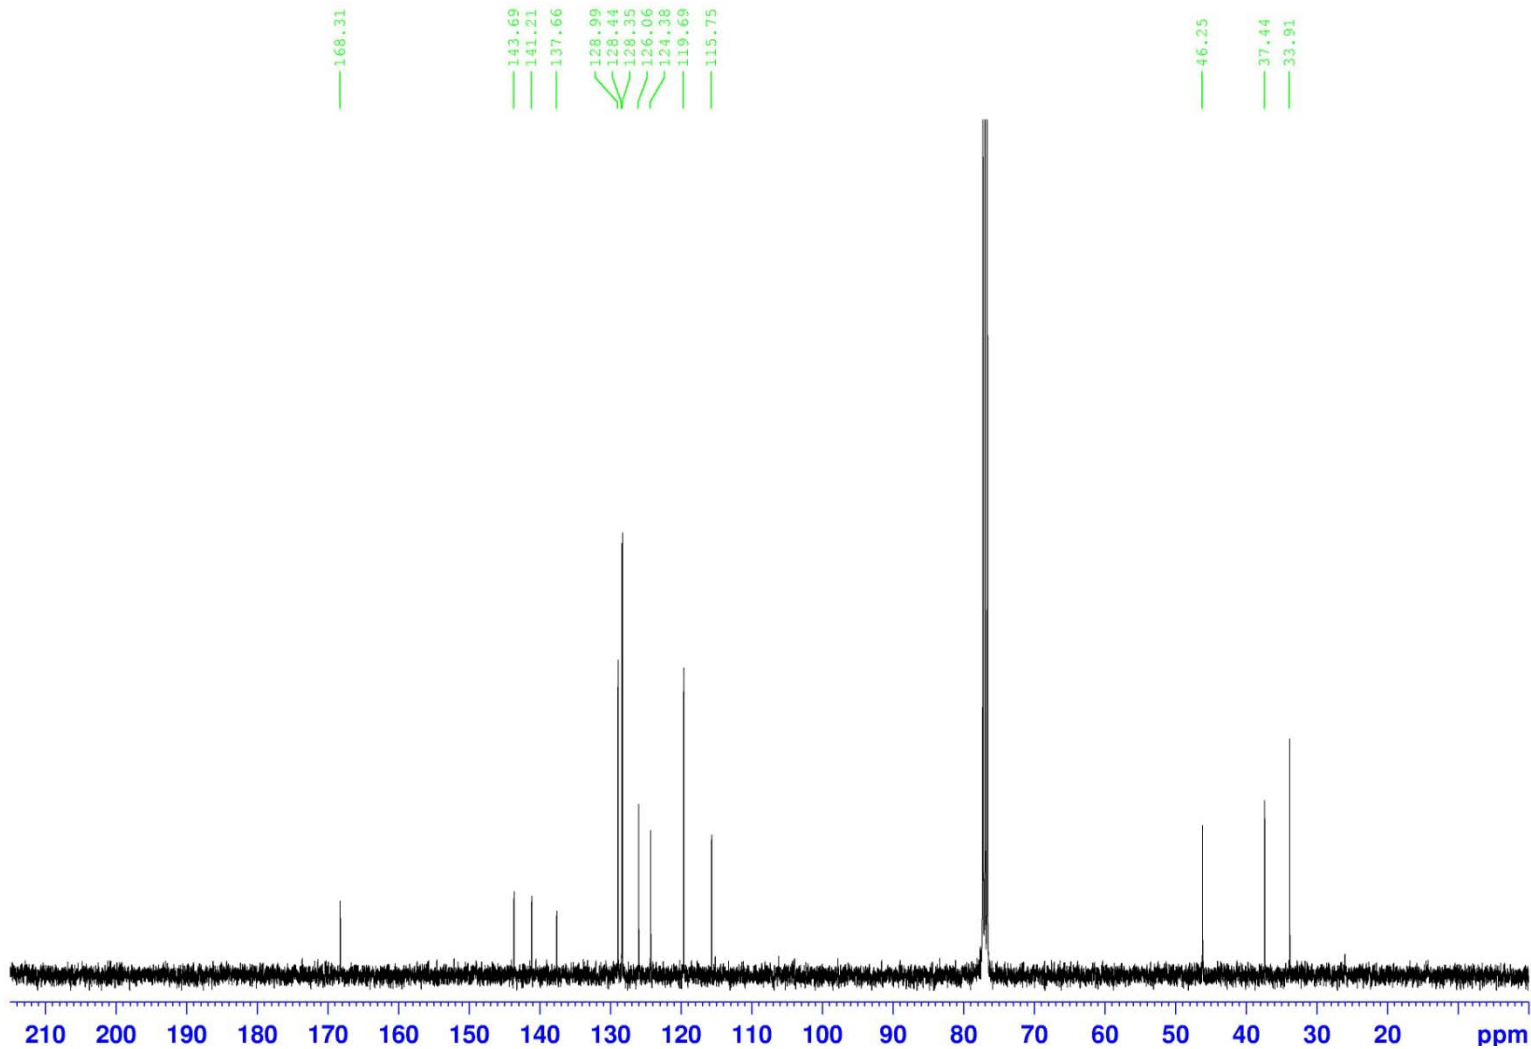

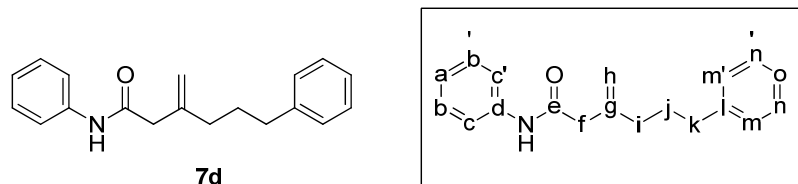

Following the general procedure for hydrolysis of *tert*-butyl esters proceeded by amidation affords, after flash chromatography on silica gel (90–80:10–20 hexanes:ethyl acetate), the title compound (57%, 2 steps) as a white solid.

|                                                                             |                                                                                                                                                                                                                                                                                                              |
|-----------------------------------------------------------------------------|--------------------------------------------------------------------------------------------------------------------------------------------------------------------------------------------------------------------------------------------------------------------------------------------------------------|
| <b>m.p.</b>                                                                 | 51–52.5 °C                                                                                                                                                                                                                                                                                                   |
| <b>TLC analysis</b>                                                         | $R_f$ 0.5 (75:25 hexanes:ethyl acetate)                                                                                                                                                                                                                                                                      |
| <b><math>^1\text{H}</math> NMR (400 MHz, <math>\text{CDCl}_3</math>)</b>    | $\delta$ 7.60 (1H, br s, NH), 7.52 (2H, d, $J$ = 7.9 Hz, m,m'), 7.40–7.35 (2H, m, c,c'), 7.35–7.25 (2H, m, b,b'), 7.25–7.20 (3H, m, n,n',o), 7.15 (1H, t, $J$ = 7.3 Hz, a), 5.13 and 5.11 (2H, s's, h), 3.18 (2H, s, f), 2.66 (2H, t, $J$ = 7.7 Hz, k), 2.22 (2H, t, $J$ = 7.4 Hz, i), 1.90–1.80 (2H, m, j). |
| <b><math>^{13}\text{C}</math> NMR (100 MHz, <math>\text{CDCl}_3</math>)</b> | $\delta$ 168.71 (e), 144.20 (d), 141.98 (l), 137.71 (g), 129.02 (b,b'), 128.44 (m,m'), 128.37 (n,n'), 125.87 (o), 124.43 (a), 119.83 (c,c'), 115.20 (h), 46.06 (f), 35.52 (i), 35.42 (k), 29.24 (j).                                                                                                         |
| <b>IR (neat)</b>                                                            | 3303 (N-H stretch), 3061, 3028, 2935, 1659 (C=O stretch), 1598, 1543 (N-H bend), 1497, 1441, 1334, 1245 (C-N stretch), 1155, 899, 749, 690 $\text{cm}^{-1}$ .                                                                                                                                                |
| <b>HRMS (EI)</b>                                                            | Calcd. for $\text{C}_{19}\text{H}_{21}\text{NO}$ : 279.1623, found 279.1618 $m/z$ .                                                                                                                                                                                                                          |



**<sup>1</sup>H NMR of 7d**

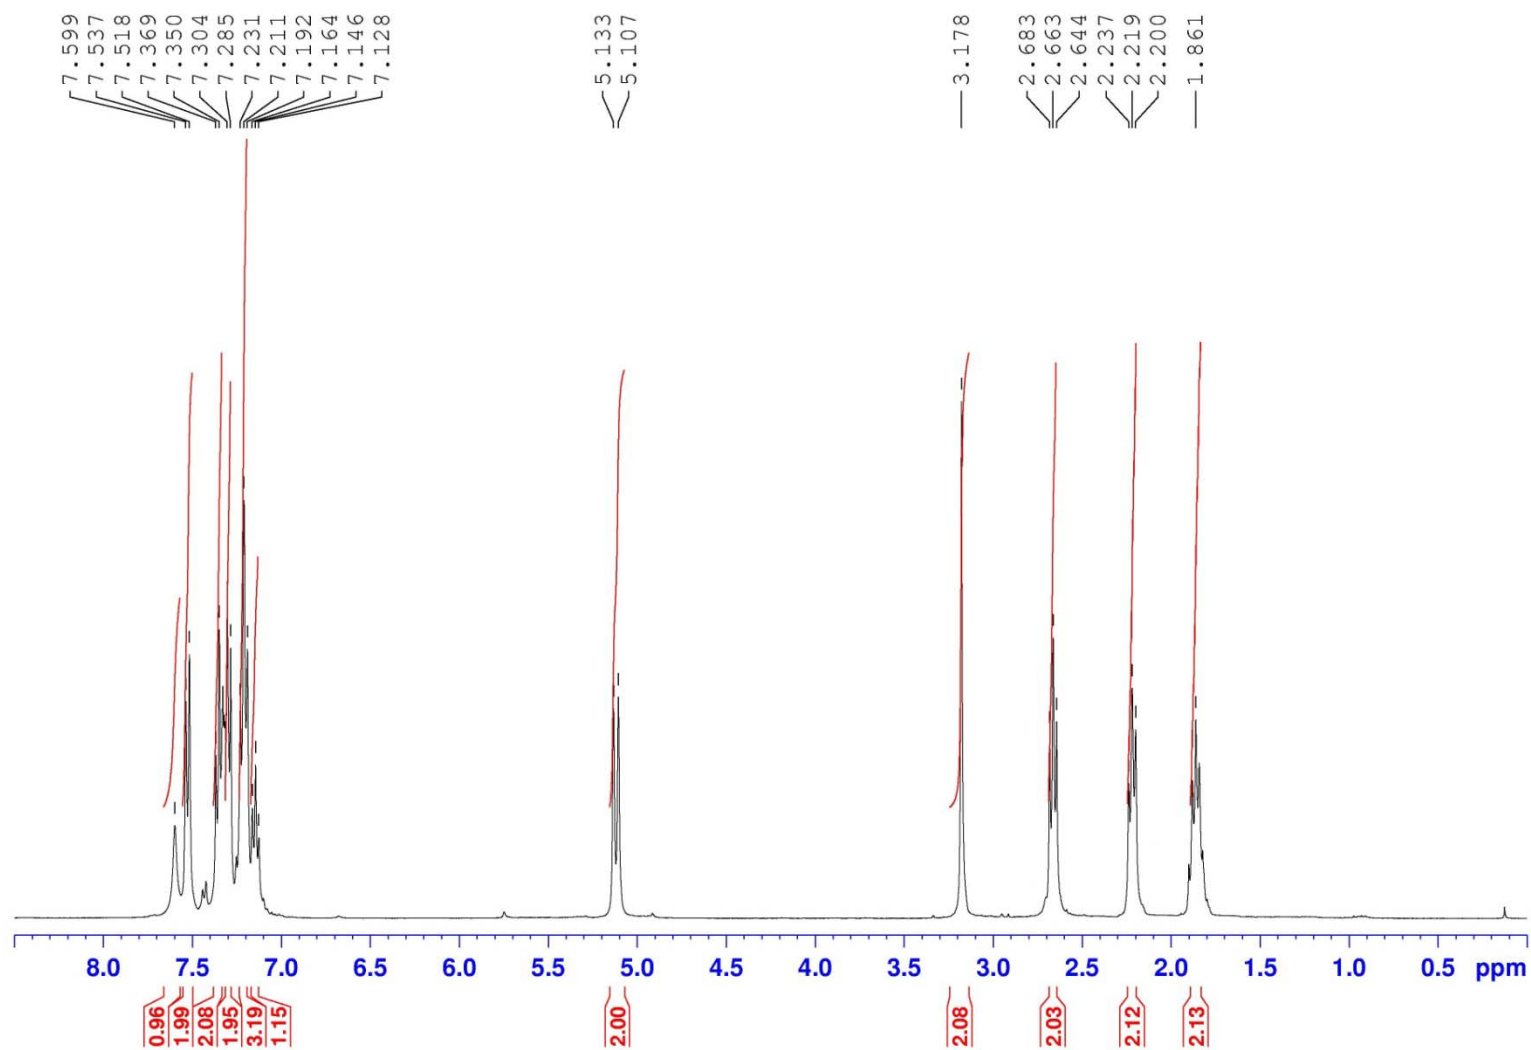

**<sup>13</sup>C NMR of 7d**

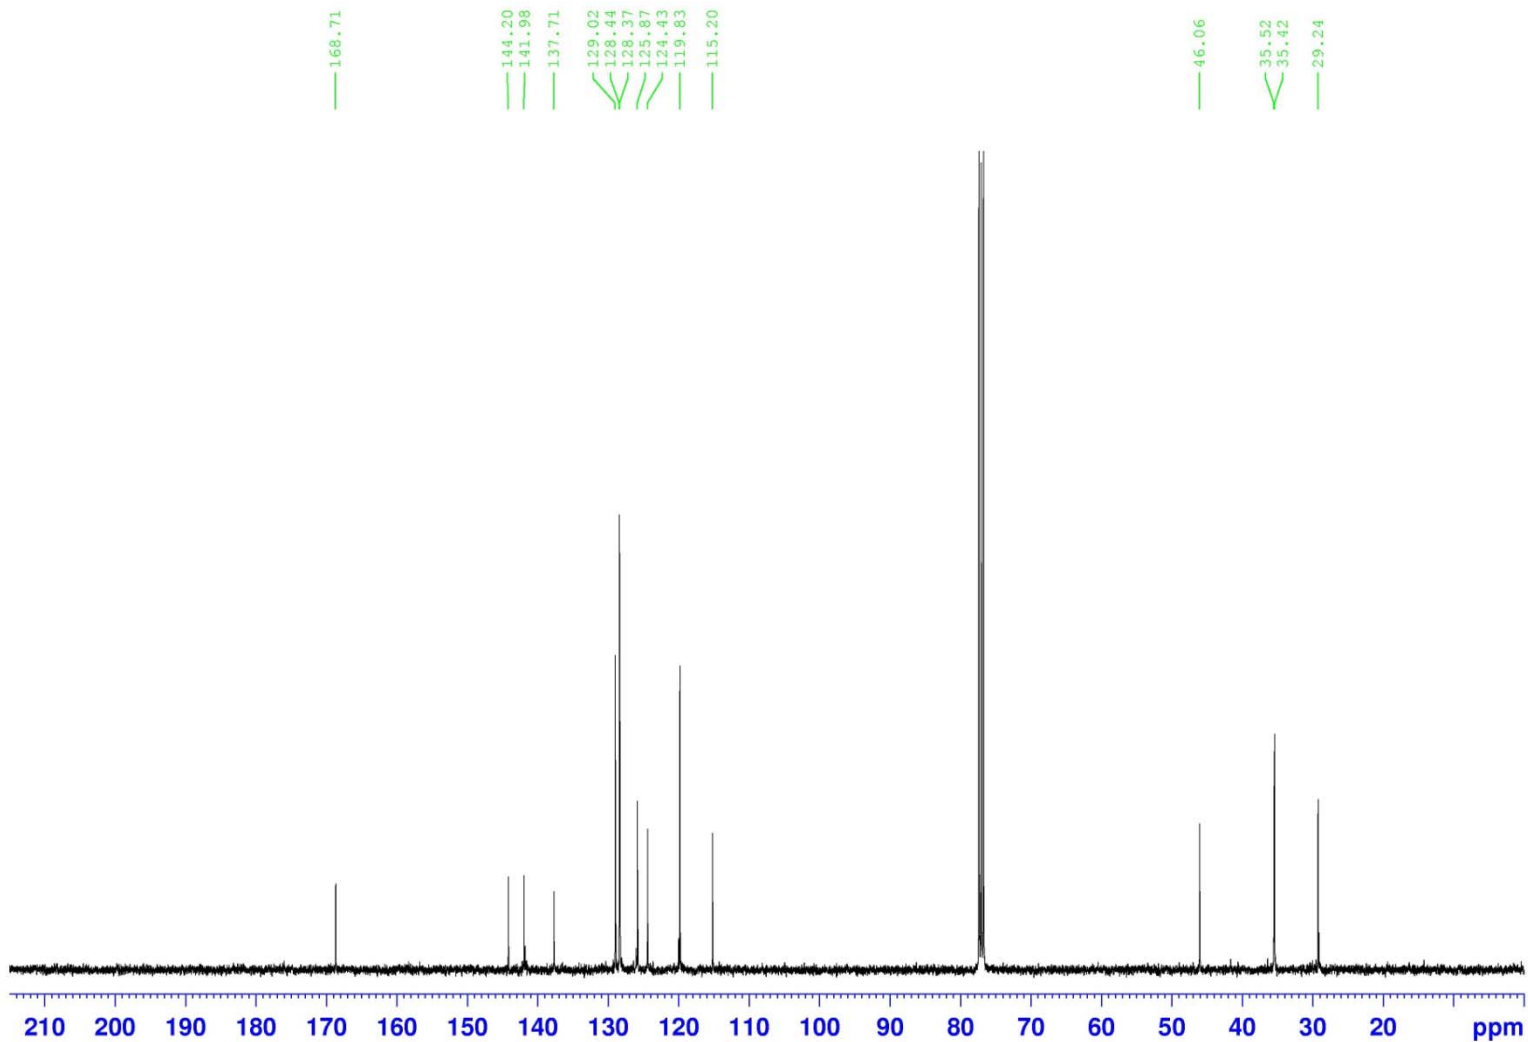

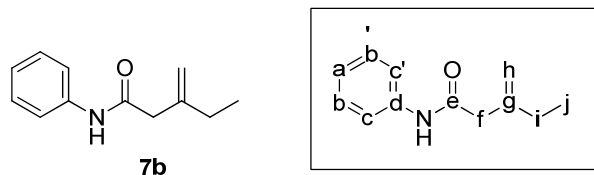

Following the general procedure for hydrolysis of *tert*-butyl esters proceeded by amidation affords, after flash chromatography on silica gel (85–75:15–25 hexanes:ethyl acetate), the title compound (64%, 2 steps) as a white solid.

|                                                                             |                                                                                                                                                                                                                                             |
|-----------------------------------------------------------------------------|---------------------------------------------------------------------------------------------------------------------------------------------------------------------------------------------------------------------------------------------|
| <b>m.p.</b>                                                                 | 101–102 °C                                                                                                                                                                                                                                  |
| <b>TLC analysis</b>                                                         | $R_f$ 0.3 (75:25 hexanes:ethyl acetate)                                                                                                                                                                                                     |
| <b><math>^1\text{H}</math> NMR (400 MHz, <math>\text{CDCl}_3</math>)</b>    | $\delta$ 7.62 (1H, br s, NH), 7.52 (2H, d, $J$ = 8.0 Hz, c,c'), 7.33 (2H, t, $J$ = 7.6 Hz, b,b'), 7.12 (1H, t, $J$ = 7.6 Hz, a), 5.11 and 5.06 (2H, s's, h), 3.17 (2H, s, f), 2.18 (2H, q, $J$ = 7.2 Hz, i), 1.11 (3H, t, $J$ = 7.2 Hz, j). |
| <b><math>^{13}\text{C}</math> NMR (100 MHz, <math>\text{CDCl}_3</math>)</b> | $\delta$ 168.72 (e), 146.09(d), 137.79 (g), 128.98 (b,b'), 124.33 (a), 119.74 (c,c'), 113.92 (h), 46.23 (f), 28.89 (i), 12.12 (j).                                                                                                          |
| <b>IR (neat)</b>                                                            | 3240 (N-H stretch), 3187, 2955, 2839, 1658 (C=O stretch), 1595, 1544 (N-H bend), 1488, 1444, 1400, 1352, 1297, 1252 (C-N stretch), 1187, 969, 759, 693 $\text{cm}^{-1}$ .                                                                   |
| <b>HRMS (CI)</b>                                                            | Calcd. for $\text{C}_{12}\text{H}_{16}\text{NO}$ (M+H): 190.1232, found 190.1237 $m/z$ .                                                                                                                                                    |

**<sup>1</sup>H NMR of 7b**

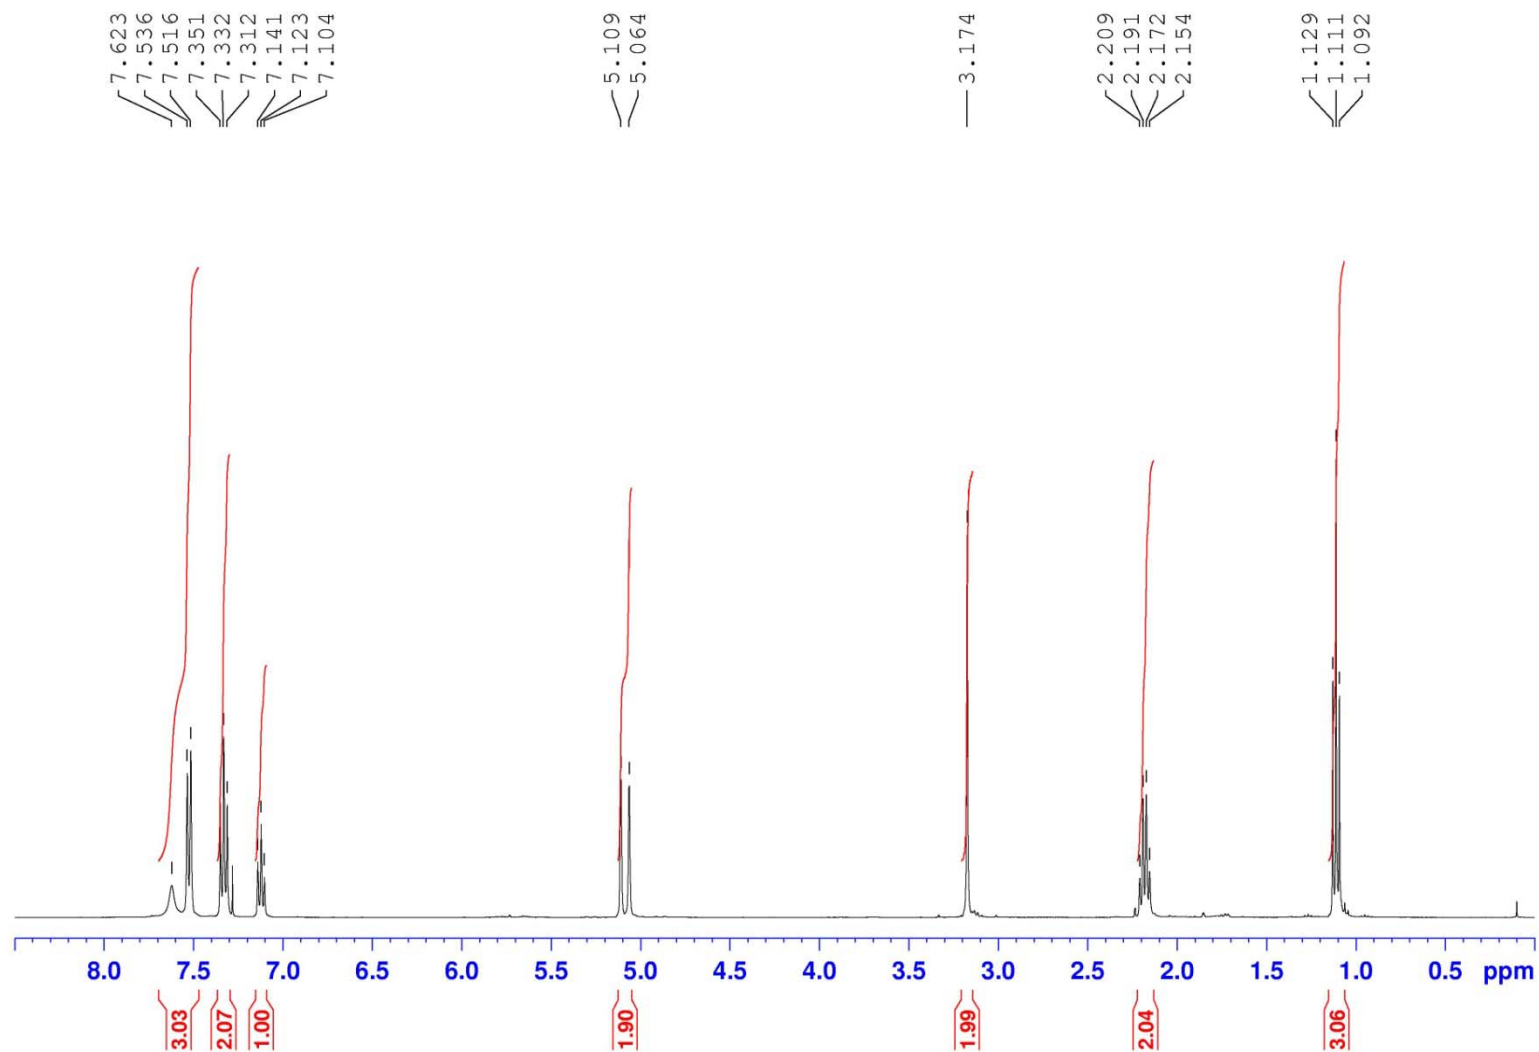

**<sup>13</sup>C NMR of 7b**

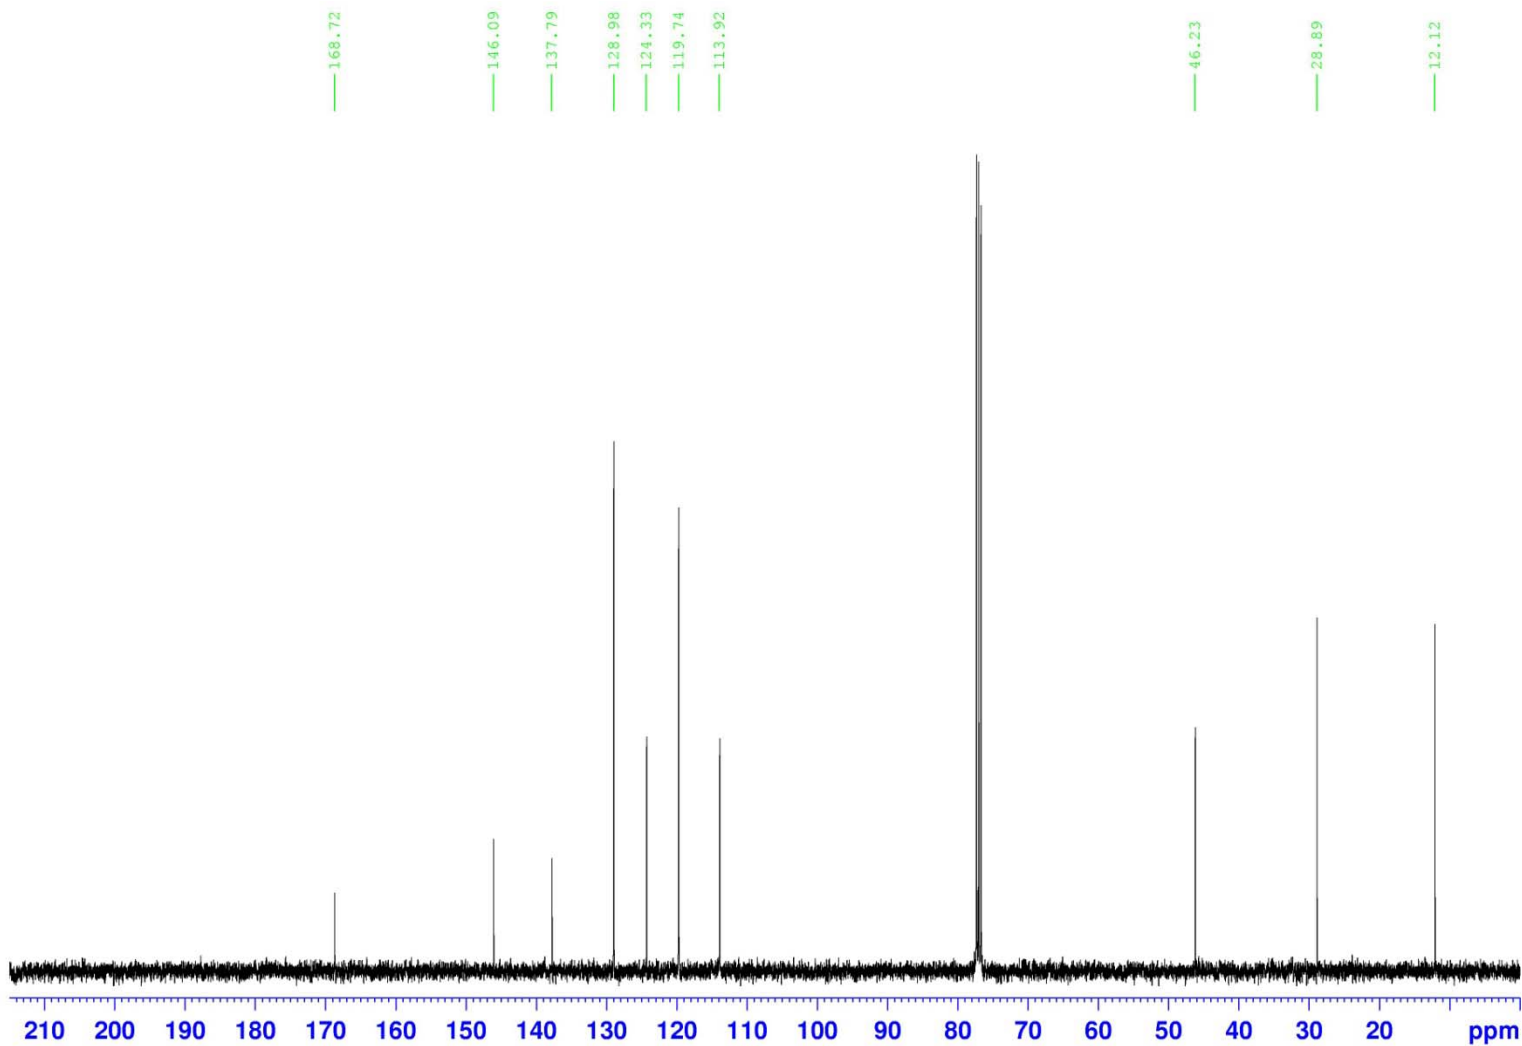

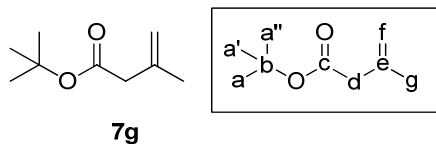

Following the general procedure for the preparation of *tert*-butyl esters via nickel-catalyzed substitution affords, after flash chromatography on silica gel (80–70:20–30 hexanes:dichloromethane), the title compound (59%) as a light yellow oil.

|                                                                            |                                                                                                               |
|----------------------------------------------------------------------------|---------------------------------------------------------------------------------------------------------------|
| <b>TLC analysis</b>                                                        | $R_f$ 0.5 (50:50 hexanes:dichloromethane)                                                                     |
| <b><math>^1\text{H}</math> NMR (300 MHz, <math>\text{CDCl}_3</math>)</b>   | $\delta$ 4.88 and 4.82 (2H, s's, f), 2.93 (2H, s, d), 1.80 (3H, s, g), 1.45 (9H, s, a,a',a'').                |
| <b><math>^{13}\text{C}</math> NMR (75 MHz, <math>\text{CDCl}_3</math>)</b> | $\delta$ 170.72 (c), 139.13 (e), 114.09 (f), 80.42 (b), 44.79 (d), 27.99 (a,a',a''), 22.38 (g).               |
| <b>IR (neat)</b>                                                           | 3075, 2976, 2934, 1728 (C=O stretch), 1647, 1455, 1366, 1258 (C-O stretch), 1139, 690, 843 $\text{cm}^{-1}$ . |

**<sup>1</sup>H NMR of 7g**

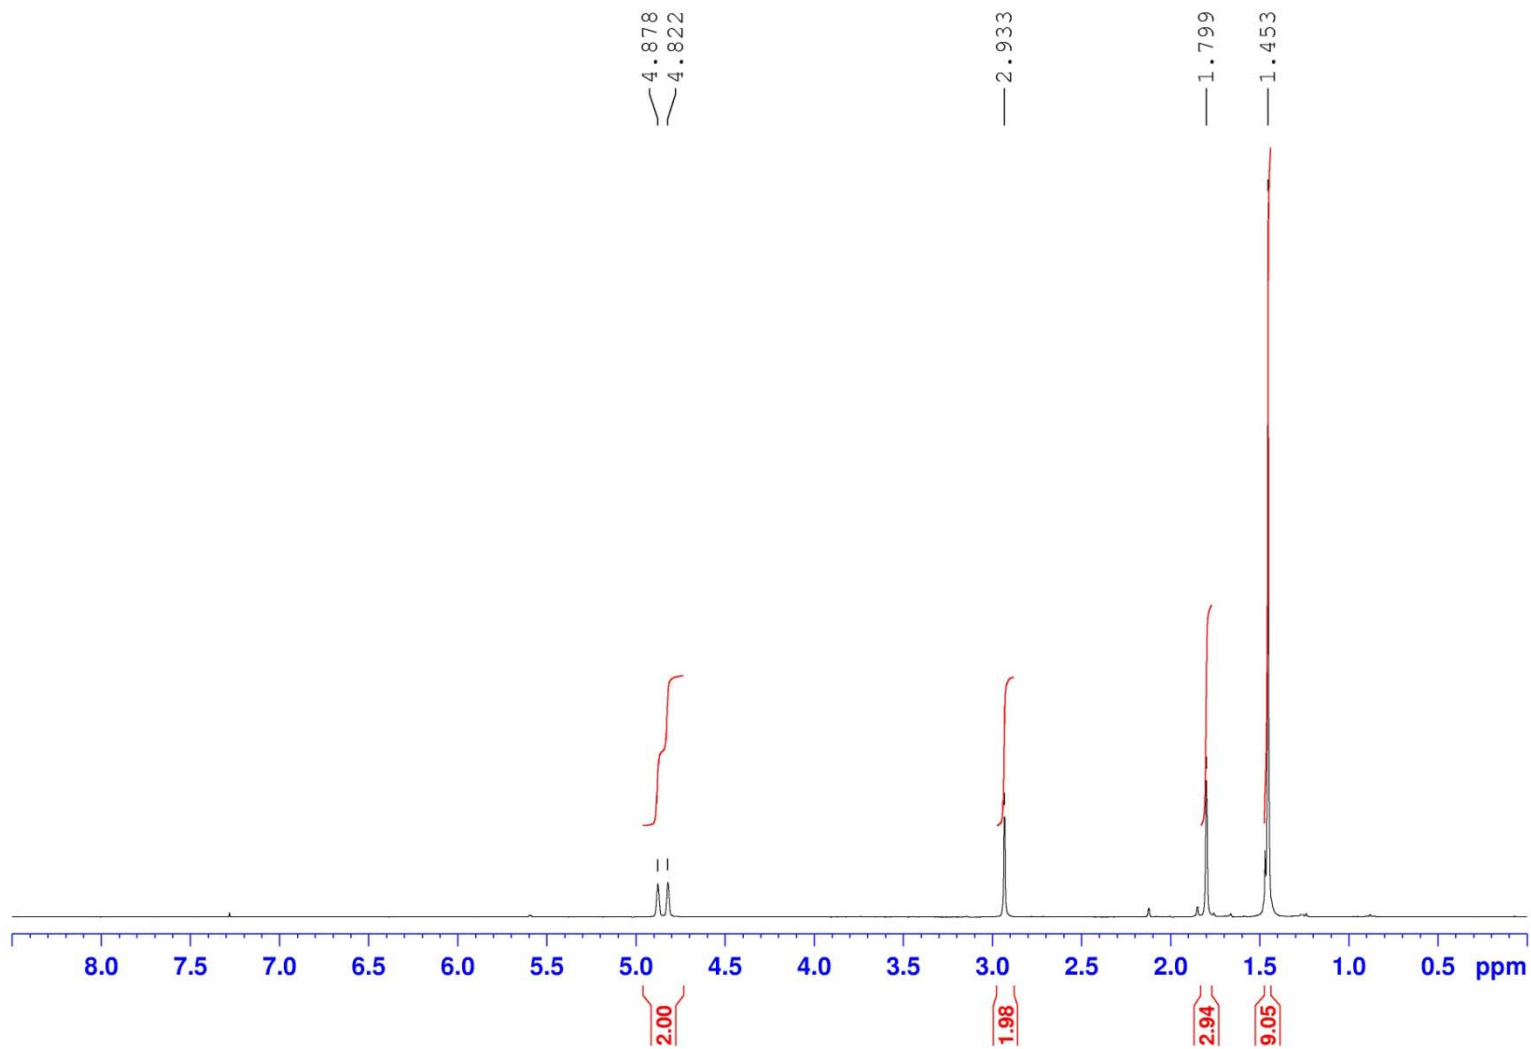

**<sup>13</sup>C NMR of 7g**

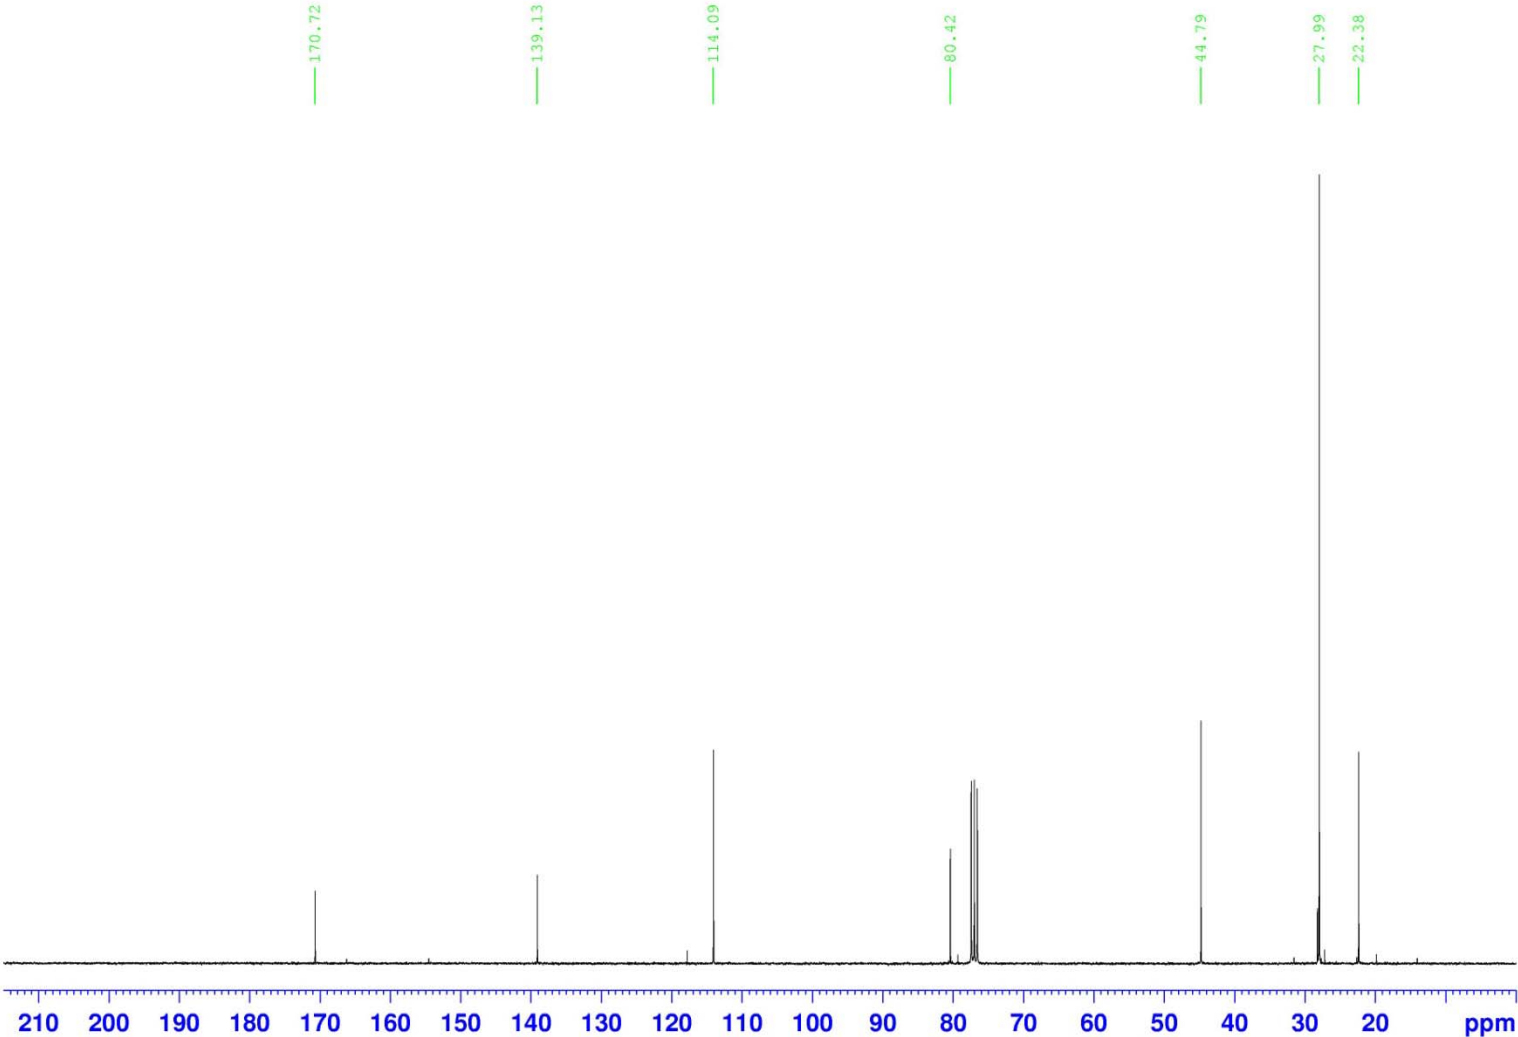



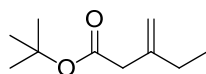

**7h**

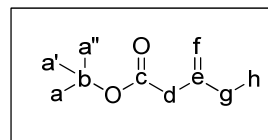

Following the general procedure for the preparation of *tert*-butyl esters via nickel-catalyzed substitution affords, after flash chromatography on silica gel (80–70:20–30 hexanes:dichloromethane), the title compound (62%) as a light yellow oil.

|                                                                             |                                                                                                                                             |
|-----------------------------------------------------------------------------|---------------------------------------------------------------------------------------------------------------------------------------------|
| <b>TLC analysis</b>                                                         | $R_f$ 0.6 (50:50 hexanes:dichloromethane)                                                                                                   |
| <b><math>^1\text{H}</math> NMR (400 MHz, <math>\text{CDCl}_3</math>)</b>    | $\delta$ 4.91 and 4.88 (2H, s's, f), 2.97 (2H, s, d), 2.12 (2H, q, $J = 7.6$ Hz, g), 1.46 (9H, s, a,a',a''), 1.06 (3H, t, $J = 7.6$ Hz, h). |
| <b><math>^{13}\text{C}</math> NMR (100 MHz, <math>\text{CDCl}_3</math>)</b> | 170.99 (c), 144.65 (e), 111.83 (f), 80.40 (b), 43.47 (d), 28.78 (g), 28.01 (a,a',a''), 12.02 (h).                                           |
| <b>IR (neat)</b>                                                            | 2935, 2848, 1731 (C=O stretch), 1653, 1391, 1252 (C-O stretch), 1145, 1122, 1040, 948, 761, 576 $\text{cm}^{-1}$ .                          |

**<sup>1</sup>H NMR of 7h**

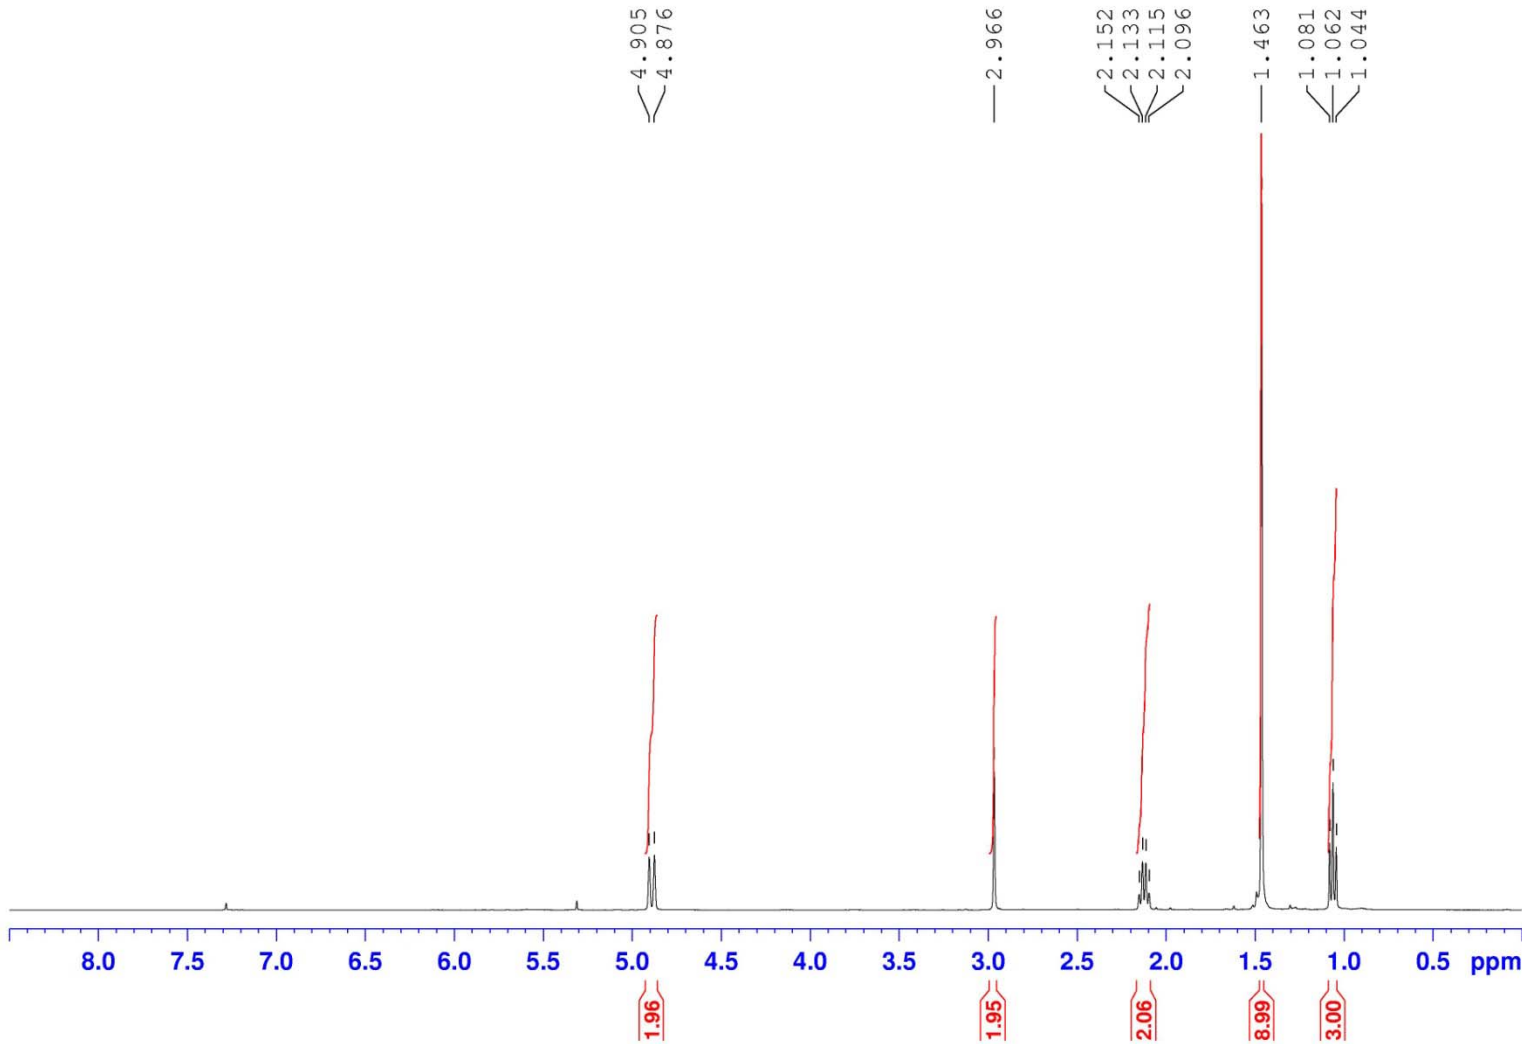

<sup>13</sup>C NMR of 7h

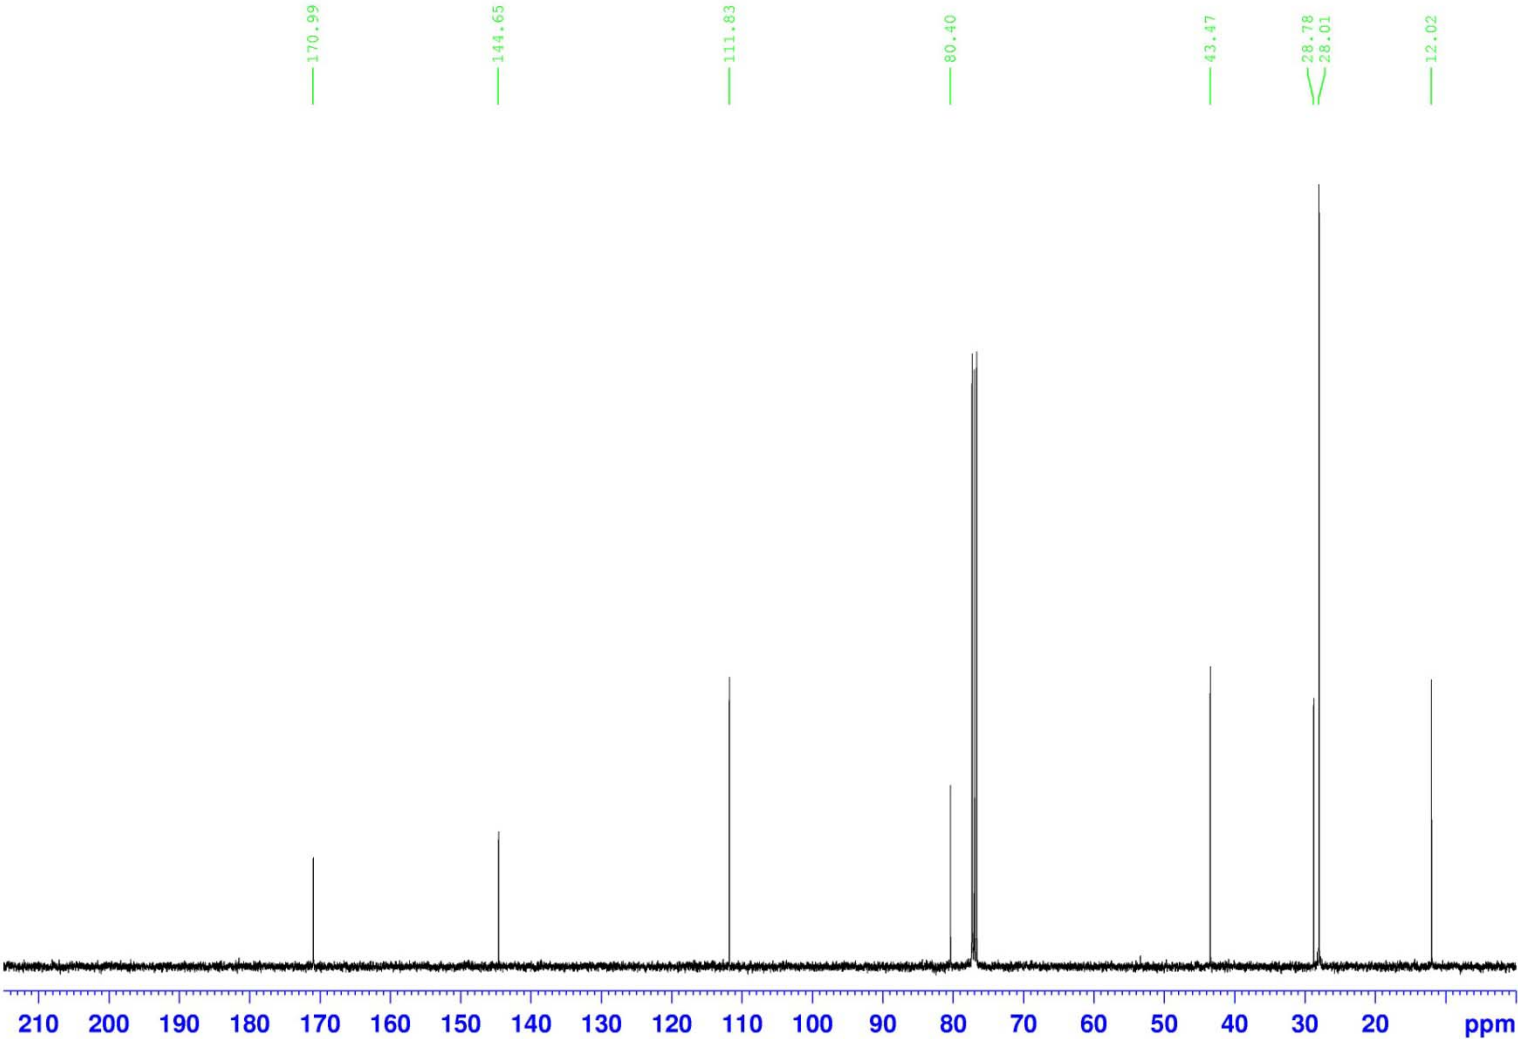

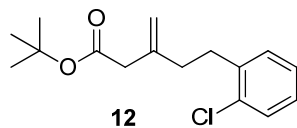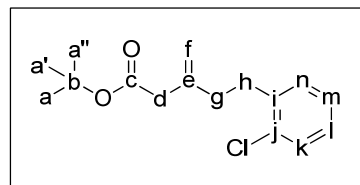

Following the general procedure for the preparation of *tert*-butyl esters via nickel-catalyzed substitution affords, after flash chromatography on silica gel (80–70:20–30 hexanes:dichloromethane), the title compound (41%) as a light yellow oil.

|                                                                            |                                                                                                                                                                                             |
|----------------------------------------------------------------------------|---------------------------------------------------------------------------------------------------------------------------------------------------------------------------------------------|
| <b>TLC analysis</b>                                                        | $R_f$ 0.5 (50:50 hexanes:dichloromethane)                                                                                                                                                   |
| <b><math>^1\text{H}</math> NMR (300 MHz, <math>\text{CDCl}_3</math>)</b>   | $\delta$ 7.40–7.30 (1H, m, k), 7.30–7.10 (3H, m, n,m,l), 4.98 and 4.97 (2H, s's, f), 3.04 (2H, s, d), 2.91 (2H, t, $J$ = 7.8 Hz, h), 2.43 (2H, t, $J$ = 8.4 Hz, g), 1.48 (9H, s, a,a',a''). |
| <b><math>^{13}\text{C}</math> NMR (75 MHz, <math>\text{CDCl}_3</math>)</b> | $\delta$ 170.76 (c), 142.22 (i), 139.34 (e), 133.91 (j), 130.28 (k), 129.45 (l), 127.38 (m), 126.77 (n), 113.79 (f), 80.61 (b), 43.39 (d), 35.89 (g), 31.91 (h), 28.05 (a,a',a'').          |
| <b>IR (neat)</b>                                                           | 2975, 2931, 1722 (C=O stretch), 1647, 1474, 1443, 1366, 1254 (C-O stretch), 1142, 1052, 1038, 954, 900, 824, 749, 736, 671, 575 $\text{cm}^{-1}$ .                                          |
| <b>HRMS (ESI)</b>                                                          | Calcd. for $\text{C}_{16}\text{H}_{21}\text{ClNaO}_2$ ( $\text{M}+\text{Na}$ ): 303.1128, found 303.1120 $m/z$ .                                                                            |

**<sup>1</sup>H NMR of 12**

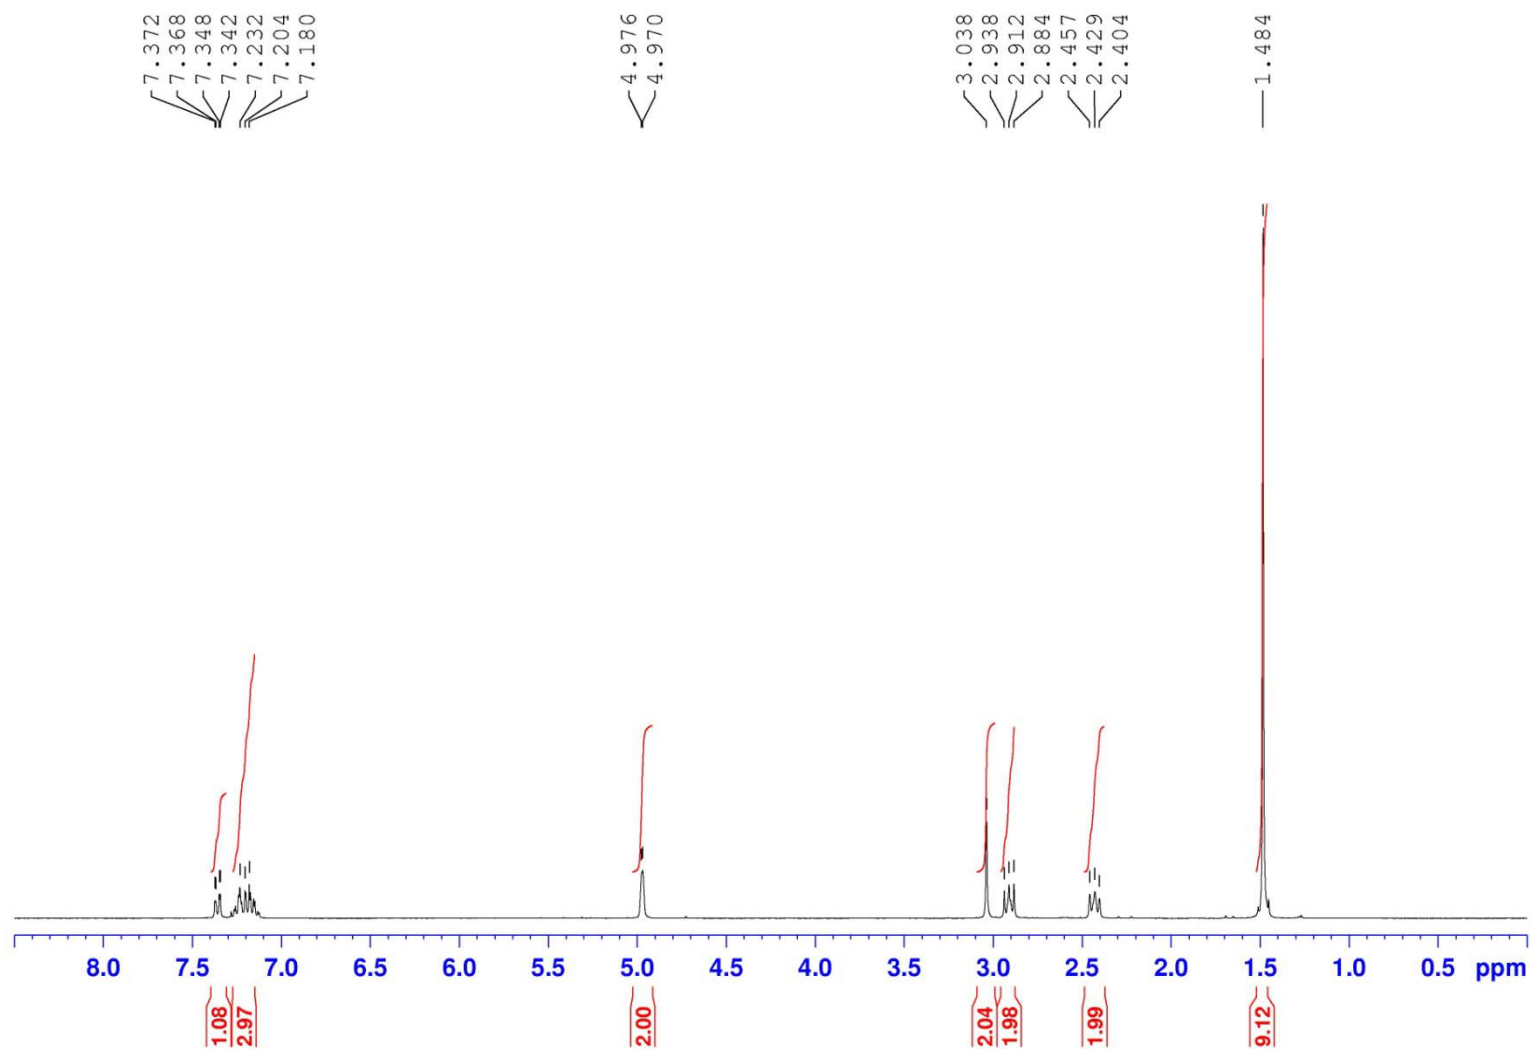

<sup>13</sup>C NMR of 12

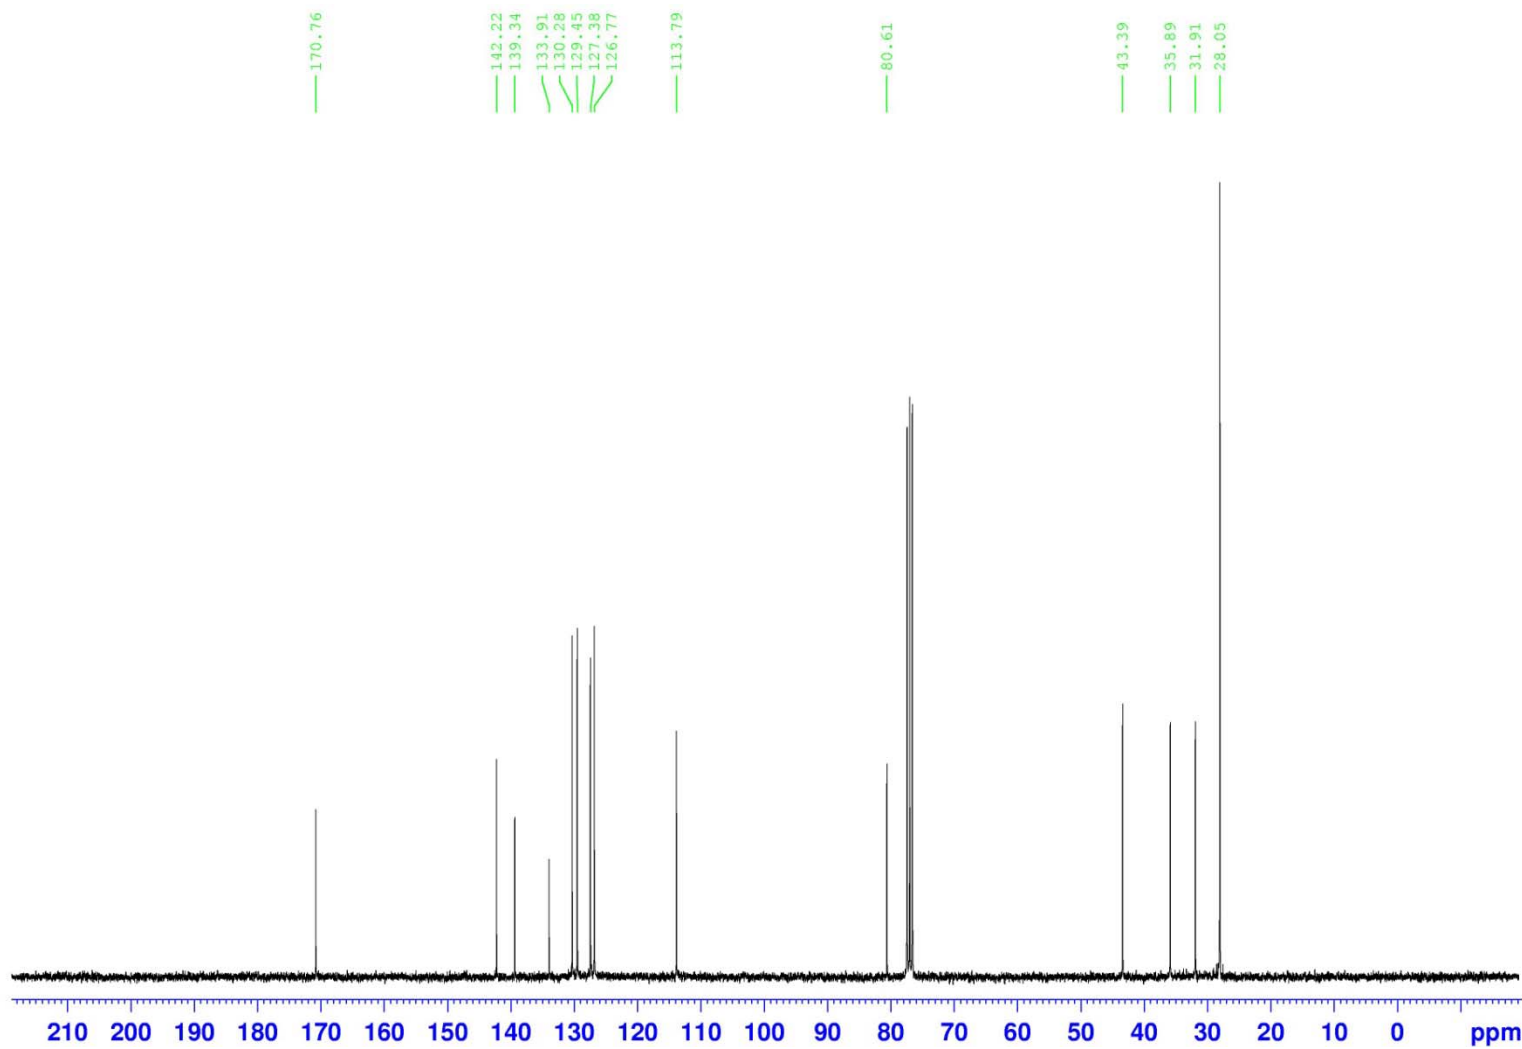

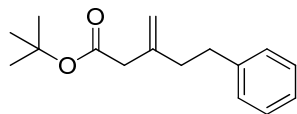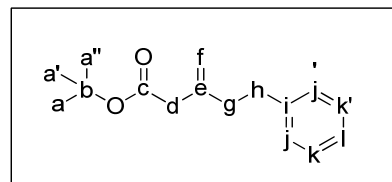

Following the general procedure for the preparation of *tert*-butyl esters via nickel-catalyzed substitution affords, after flash chromatography on silica gel (75–70:25–30 hexanes:dichloromethane), the title compound (53%) as a light yellow oil.

|                                                                            |                                                                                                                                                                                                 |
|----------------------------------------------------------------------------|-------------------------------------------------------------------------------------------------------------------------------------------------------------------------------------------------|
| <b>TLC analysis</b>                                                        | $R_f$ 0.6 (50:50 hexanes:dichloromethane)                                                                                                                                                       |
| <b><math>^1\text{H}</math> NMR (300 MHz, <math>\text{CDCl}_3</math>)</b>   | $\delta$ 7.40–7.30 (2H, m, k,k'), 7.30–7.20 (3H, m, j,j',l), 4.99 and 4.97 (2H, s's, f), 3.03 (2H, s, d), 2.83 (2H, t, $J$ = 7.5 Hz, h), 2.46 (2H, t, $J$ = 8.4 Hz, g), 1.51 (9H, s, a,a',a''). |
| <b><math>^{13}\text{C}</math> NMR (75 MHz, <math>\text{CDCl}_3</math>)</b> | $\delta$ 170.80 (c), 142.47 (i), 141.85 (e), 128.35 (j,j',k,k'), 125.88 (l), 113.64 (f), 80.58 (b), 43.49 (d), 37.72 (g), 34.05 (h), 28.08 (a,a',a'').                                          |
| <b>IR (neat)</b>                                                           | 3028, 2978, 2931, 1726 (C=O stretch), 1647, 1496, 1454, 1366, 1255 (C-O stretch), 1139, 1030, 956, 896, 841, 744, 697 $\text{cm}^{-1}$ .                                                        |

**<sup>1</sup>H NMR of 3-methylidene-5-phenylpentanoic acid *tert*-butyl ester**

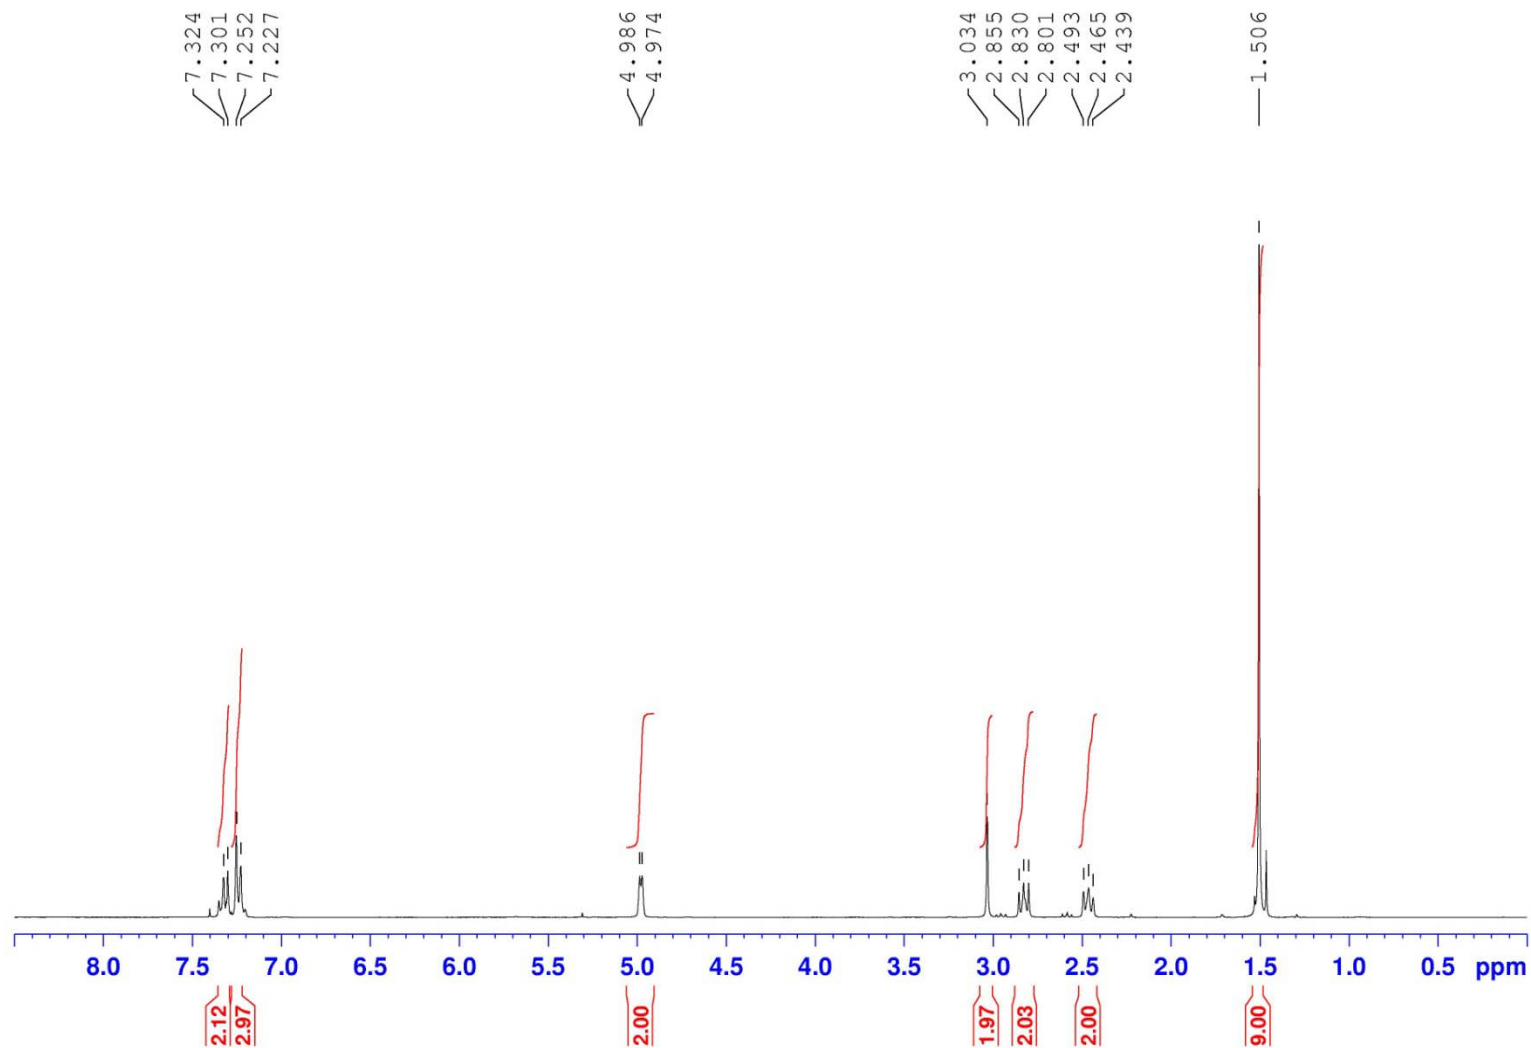



**<sup>13</sup>C NMR of 3-methylidene-5-phenylpentanoic acid *tert*-butyl ester**

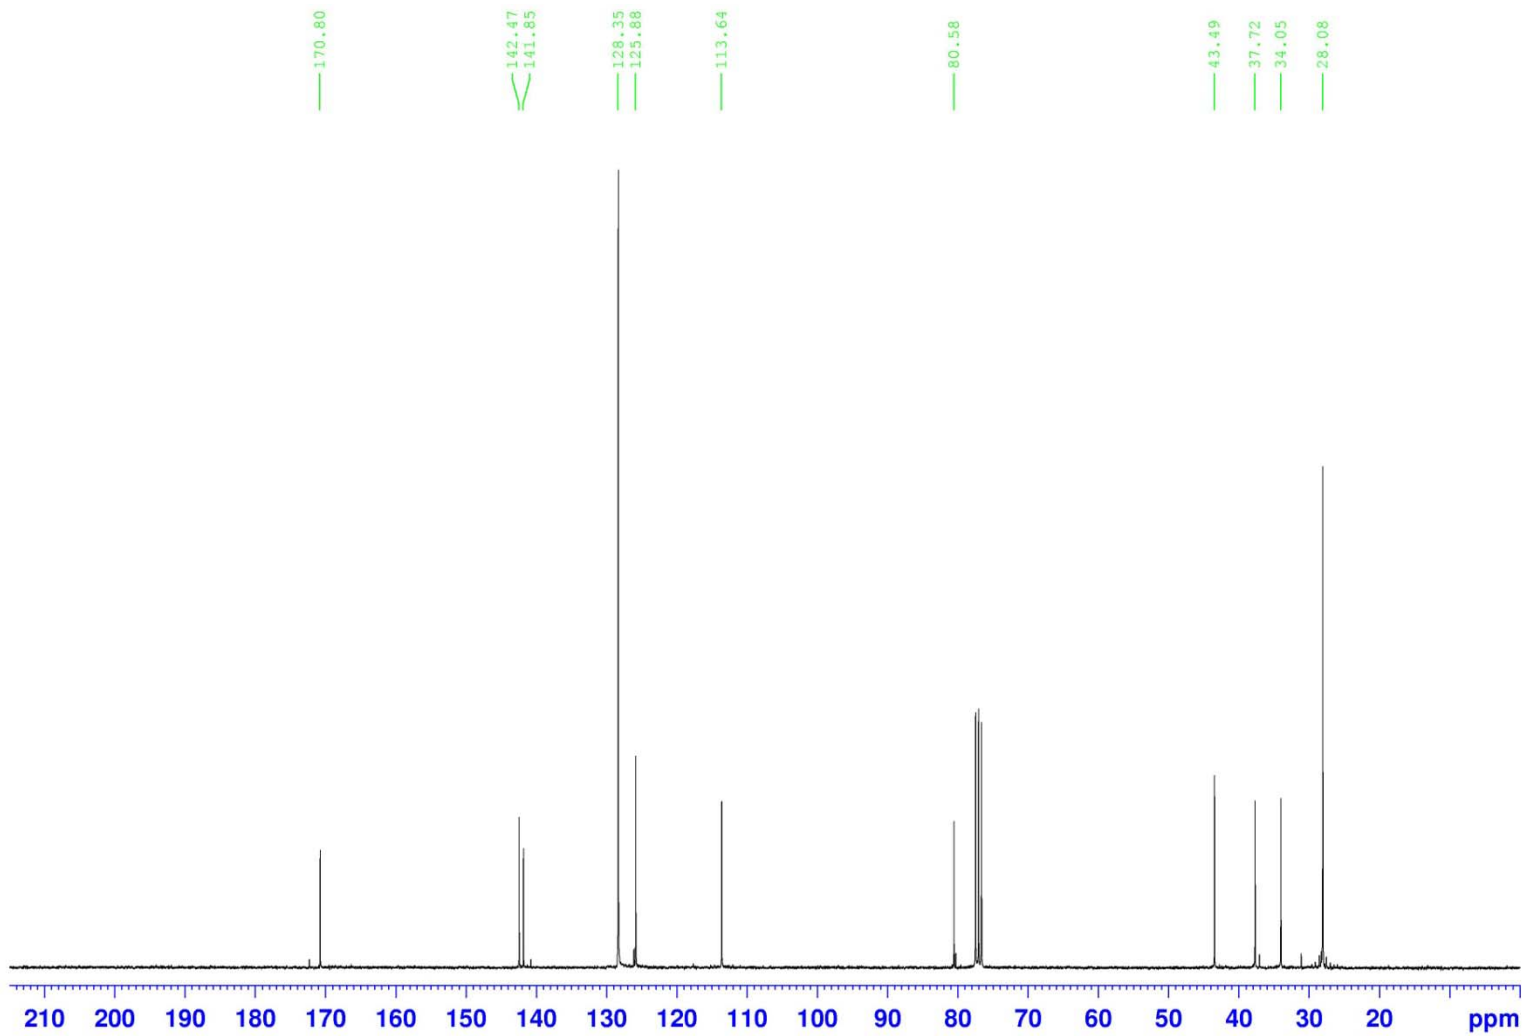

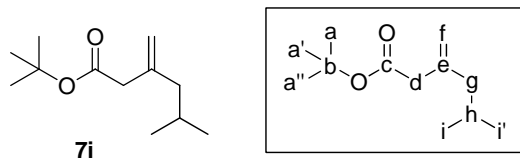

Following the general procedure for the preparation of *tert*-butyl esters through the synthesis of vinyl bromides followed by nickel-catalyzed substitution affords, after flash chromatography on silica gel (80–70:20–30 hexanes:dichloromethane), the title compound (45%, 2 steps) as a light yellow oil.

|                                                                             |                                                                                                                                                                         |
|-----------------------------------------------------------------------------|-------------------------------------------------------------------------------------------------------------------------------------------------------------------------|
| <b>TLC analysis</b>                                                         | $R_f$ 0.6 (50:50 hexanes:dichloromethane)                                                                                                                               |
| <b><math>^1\text{H}</math> NMR (400 MHz, <math>\text{CDCl}_3</math>)</b>    | $\delta$ 4.91 and 4.87 (2H, s's, f), 2.92 (2H, s, d), 1.98 (2H, d, $J$ = 7.2 Hz, g), 1.95–1.85 (1H, m, h), 1.46 (9H, s, a, a', a''), 0.89 (6H, d, $J$ = 6.6 Hz, i, i'). |
| <b><math>^{13}\text{C}</math> NMR (100 MHz, <math>\text{CDCl}_3</math>)</b> | $\delta$ 170.90 (c), 141.96 (e), 114.33 (f), 80.36 (b), 45.79 (d), 43.03 (g), 28.00 (a, a', a''), 25.75 (h), 22.38 (i, i').                                             |
| <b>IR (neat)</b>                                                            | 2969, 2912, 1722 (C=O stretch), 1431, 1376, 1177 (C-O stretch), 1117, 884, 826, 740, 521 $\text{cm}^{-1}$ .                                                             |
| <b>HRMS (CI)</b>                                                            | Calcd. for $\text{C}_{12}\text{H}_{23}\text{O}_2$ (M+H): 199.1698, found 199.1705 $m/z$ .                                                                               |

**<sup>1</sup>H NMR of 7i**

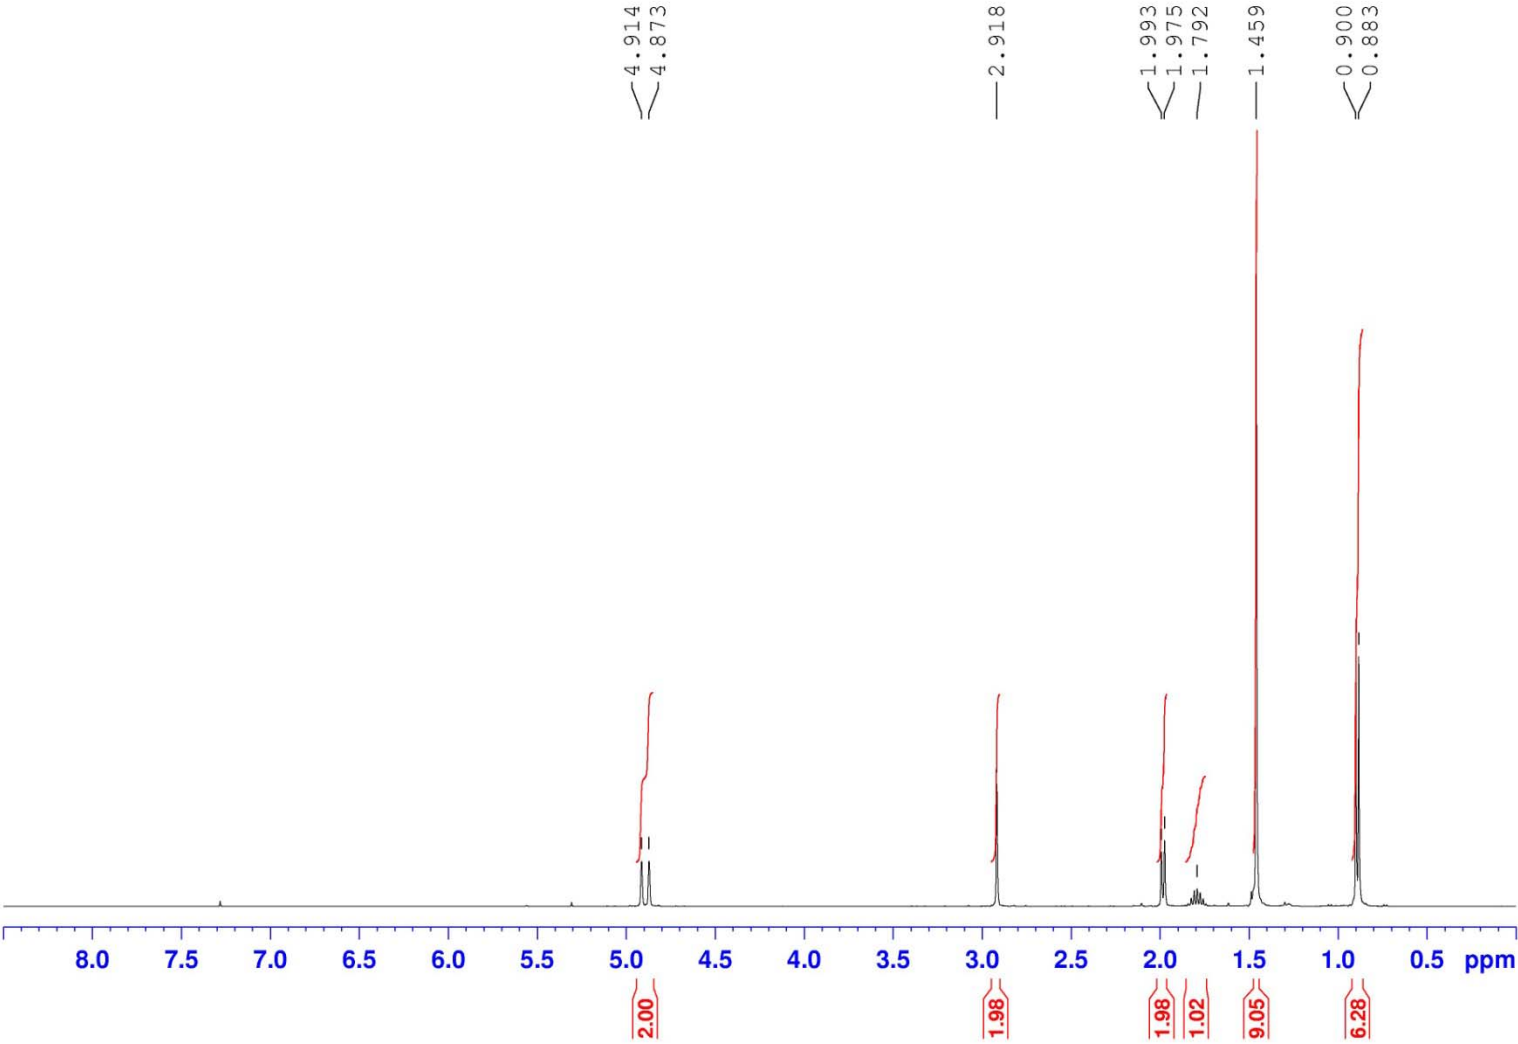

<sup>13</sup>C NMR of 7i

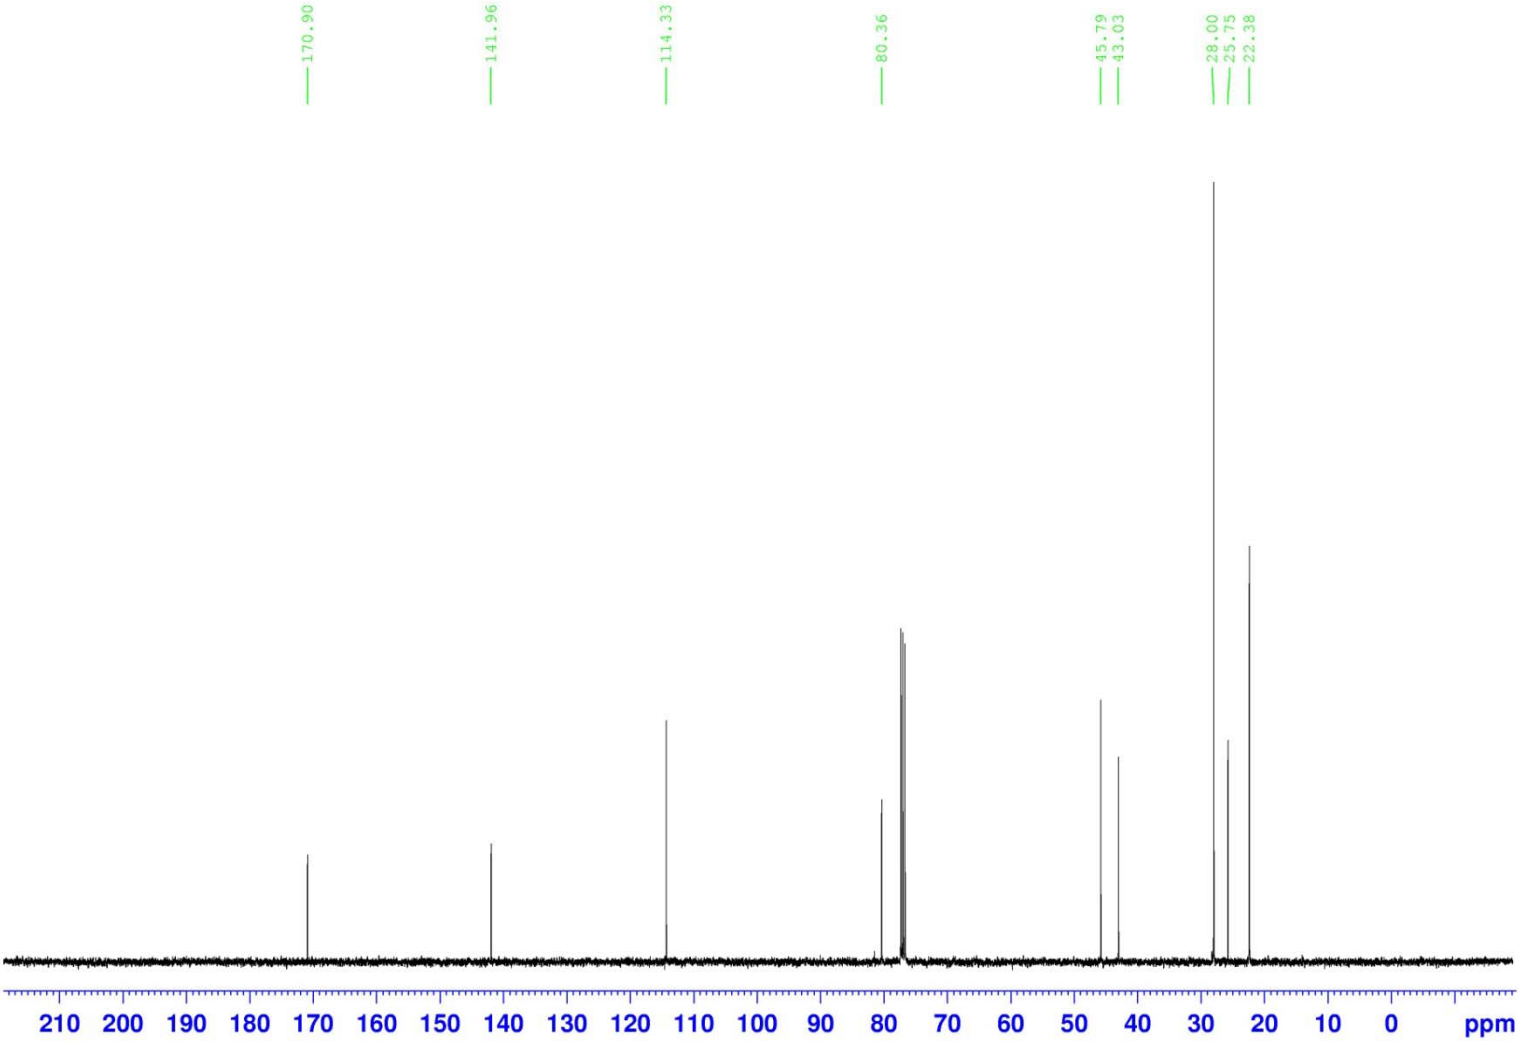

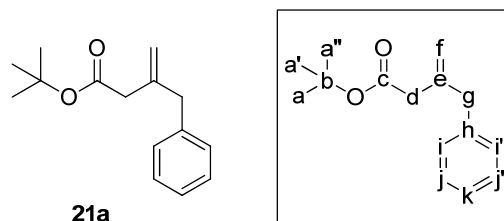

Following the general procedure for the preparation of *tert*-butyl esters by the synthesis of vinyl bromides followed by nickel-catalyzed substitution affords, after flash chromatography on silica gel (80–70:20–30 hexanes:dichloromethane), the title compound (54%, 2 steps) as a light yellow oil.

|                                                      |                                                                                                                                                |
|------------------------------------------------------|------------------------------------------------------------------------------------------------------------------------------------------------|
| <b>TLC analysis</b>                                  | $R_f$ 0.6 (50:50 hexanes:dichloromethane)                                                                                                      |
| <b><sup>1</sup>H NMR (300 MHz, CDCl<sub>3</sub>)</b> | δ 7.40–7.30 (2H, m, j,j'), 7.30–7.20 (3H, m, i,i',k), 5.01 and 4.95 (2H, s's, f), 3.48 (2H, s, g), 2.92 (2H, s, d), 1.49 (9H, s, a,a',a'').    |
| <b><sup>13</sup>C NMR (75 MHz, CDCl<sub>3</sub>)</b> | δ 170.75 (c), 142.43 (h), 138.97 (e), 129.17 (i,i'), 128.39 (j,j'), 126.30 (k), 115.26 (f), 80.59 (b), 42.68 (g), 42.40 (d), 28.06 (a,a',a''). |
| <b>IR (neat)</b>                                     | 2978, 1725 (C=O stretch), 1647, 1494, 1366, 1253 (C-O stretch), 1137, 966, 898, 838, 728, 696, 628 cm <sup>-1</sup> .                          |
| <b>HRMS (ESI)</b>                                    | Calcd. for C <sub>15</sub> H <sub>20</sub> NaO <sub>2</sub> (M+Na): 255.1361, found 255.1371 $m/z$ .                                           |

**<sup>1</sup>H NMR of 21a**

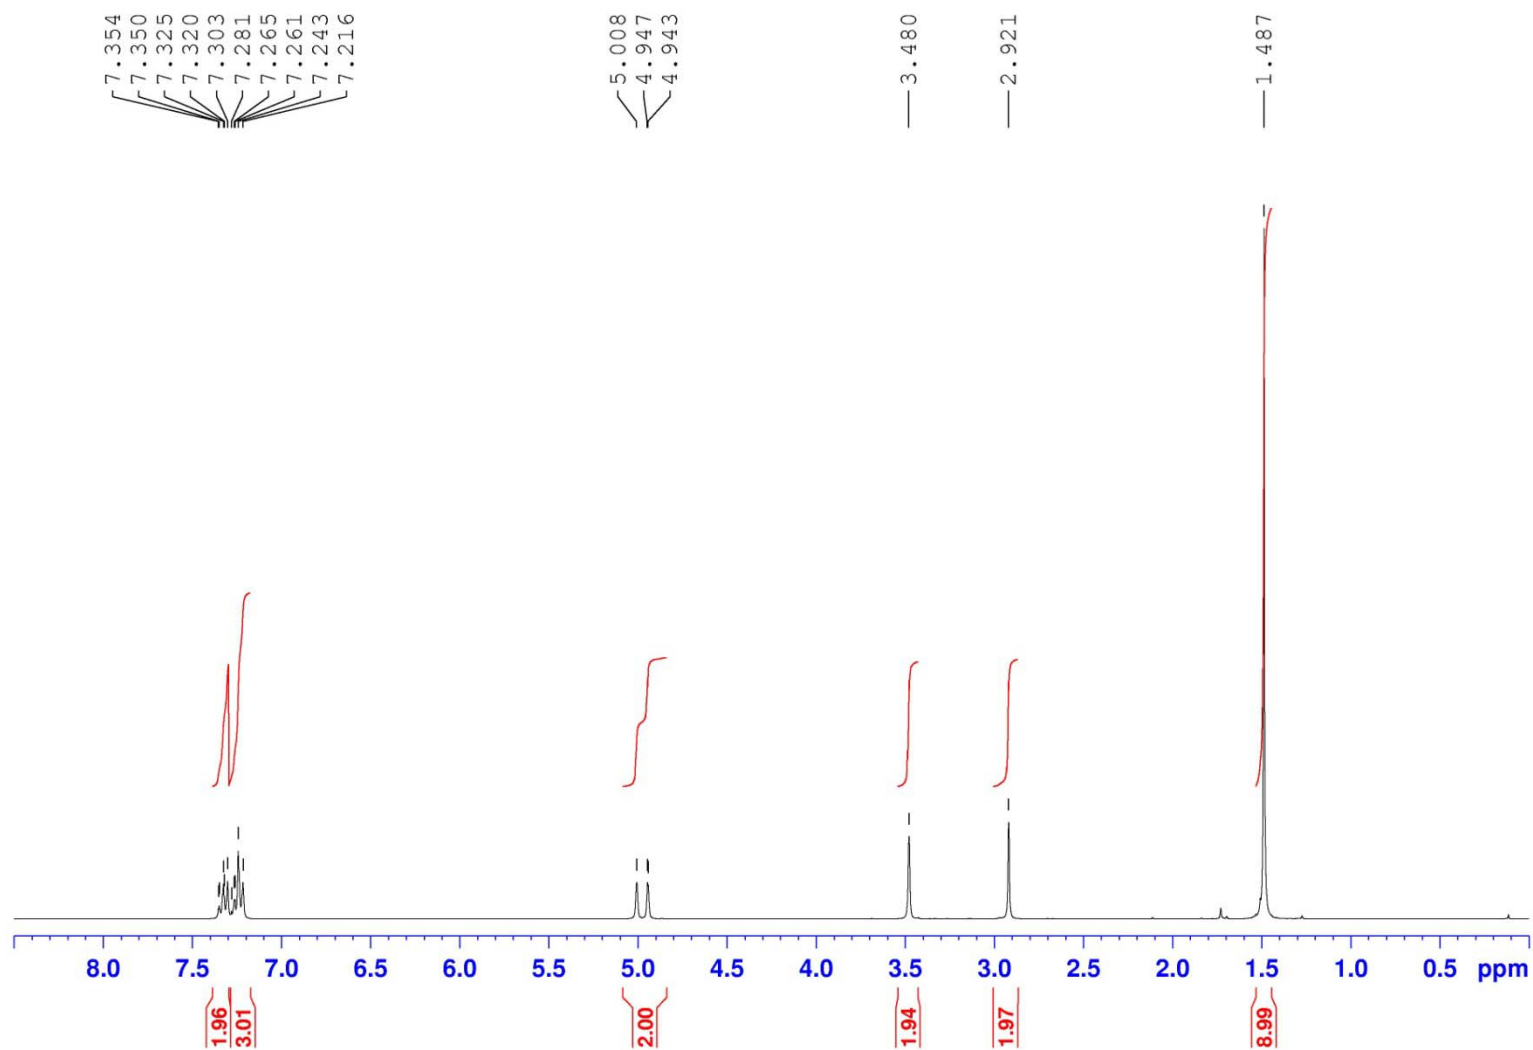

**<sup>13</sup>C NMR of 21a**

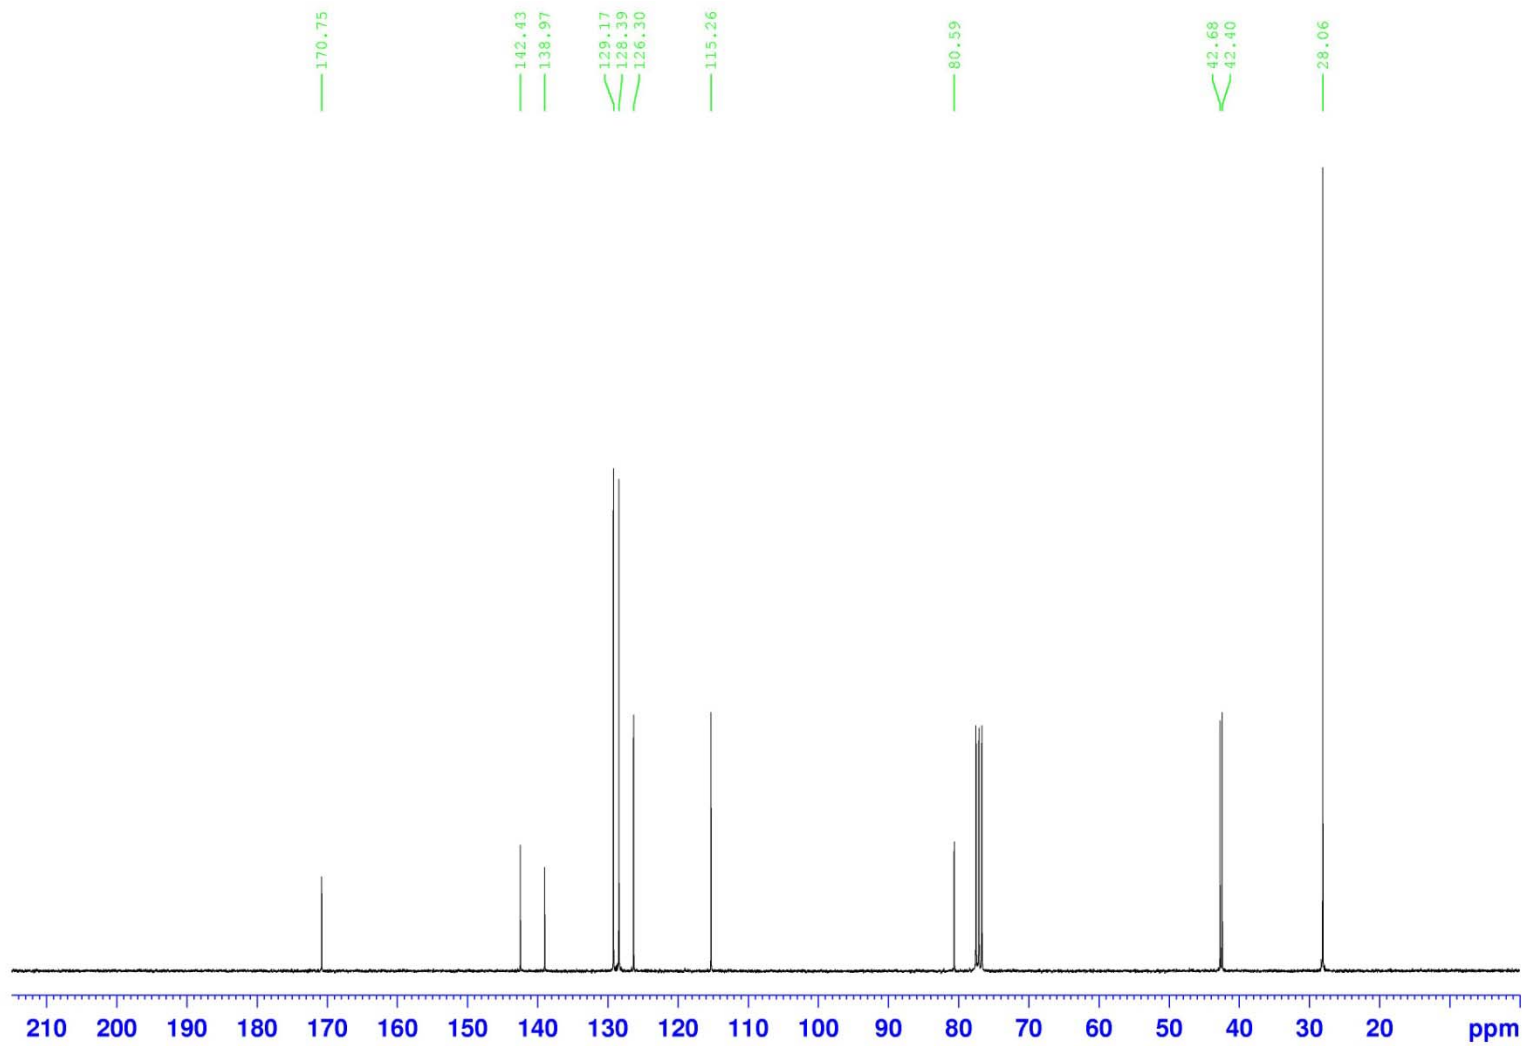

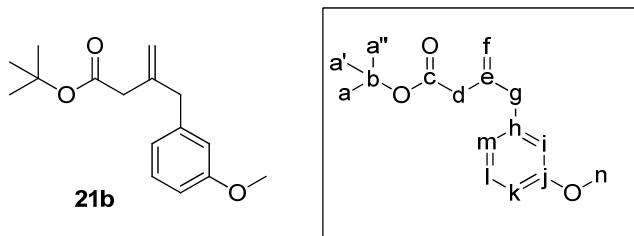

Following the general procedure for the preparation of *tert*-butyl esters through the synthesis of vinyl bromides followed by nickel-catalyzed substitution affords, after flash chromatography on silica gel (80–70:20–30 hexanes:dichloromethane), the title compound (42%, 2 steps) as a light yellow oil.

|                                                                             |                                                                                                                                                                                    |
|-----------------------------------------------------------------------------|------------------------------------------------------------------------------------------------------------------------------------------------------------------------------------|
| <b>TLC analysis</b>                                                         | $R_f$ 0.3 (50:50 hexanes:dichloromethane)                                                                                                                                          |
| <b><math>^1\text{H}</math> NMR (400 MHz, <math>\text{CDCl}_3</math>)</b>    | $\delta$ 7.30–7.20 (1H, m, i), 6.85–6.75 (3H, m, m,l,k), 5.01 and 4.97 (2H, s's, f), 3.82 (3H, s, n), 3.45 (2H, s, g), 2.92 (2H, s, d), 1.48 (9H, s, a,a',a'').                    |
| <b><math>^{13}\text{C}</math> NMR (100 MHz, <math>\text{CDCl}_3</math>)</b> | $\delta$ 170.70 (e), 159.70 (j), 142.22 (h), 140.57 (e), 129.32 (l), 121.59 (m), 115.31 (i), 114.78 (f), 111.71 (k), 80.55 (b), 55.12 (n), 42.73 (d), 42.33 (g), 28.05 (a,a',a''). |
| <b>IR (neat)</b>                                                            | 2977, 1725 (C=O stretch), 1600, 1584, 1488, 1435, 1366, 1257 (C-O stretch), 1140, 1050, 899, 779, 754, 695, 571 $\text{cm}^{-1}$ .                                                 |
| <b>HRMS (ESI)</b>                                                           | Calcd. for $\text{C}_{16}\text{H}_{22}\text{NaO}_3$ (M+Na): 285.1467, found 285.1479 $m/z$ .                                                                                       |



**<sup>1</sup>H NMR of 21b**

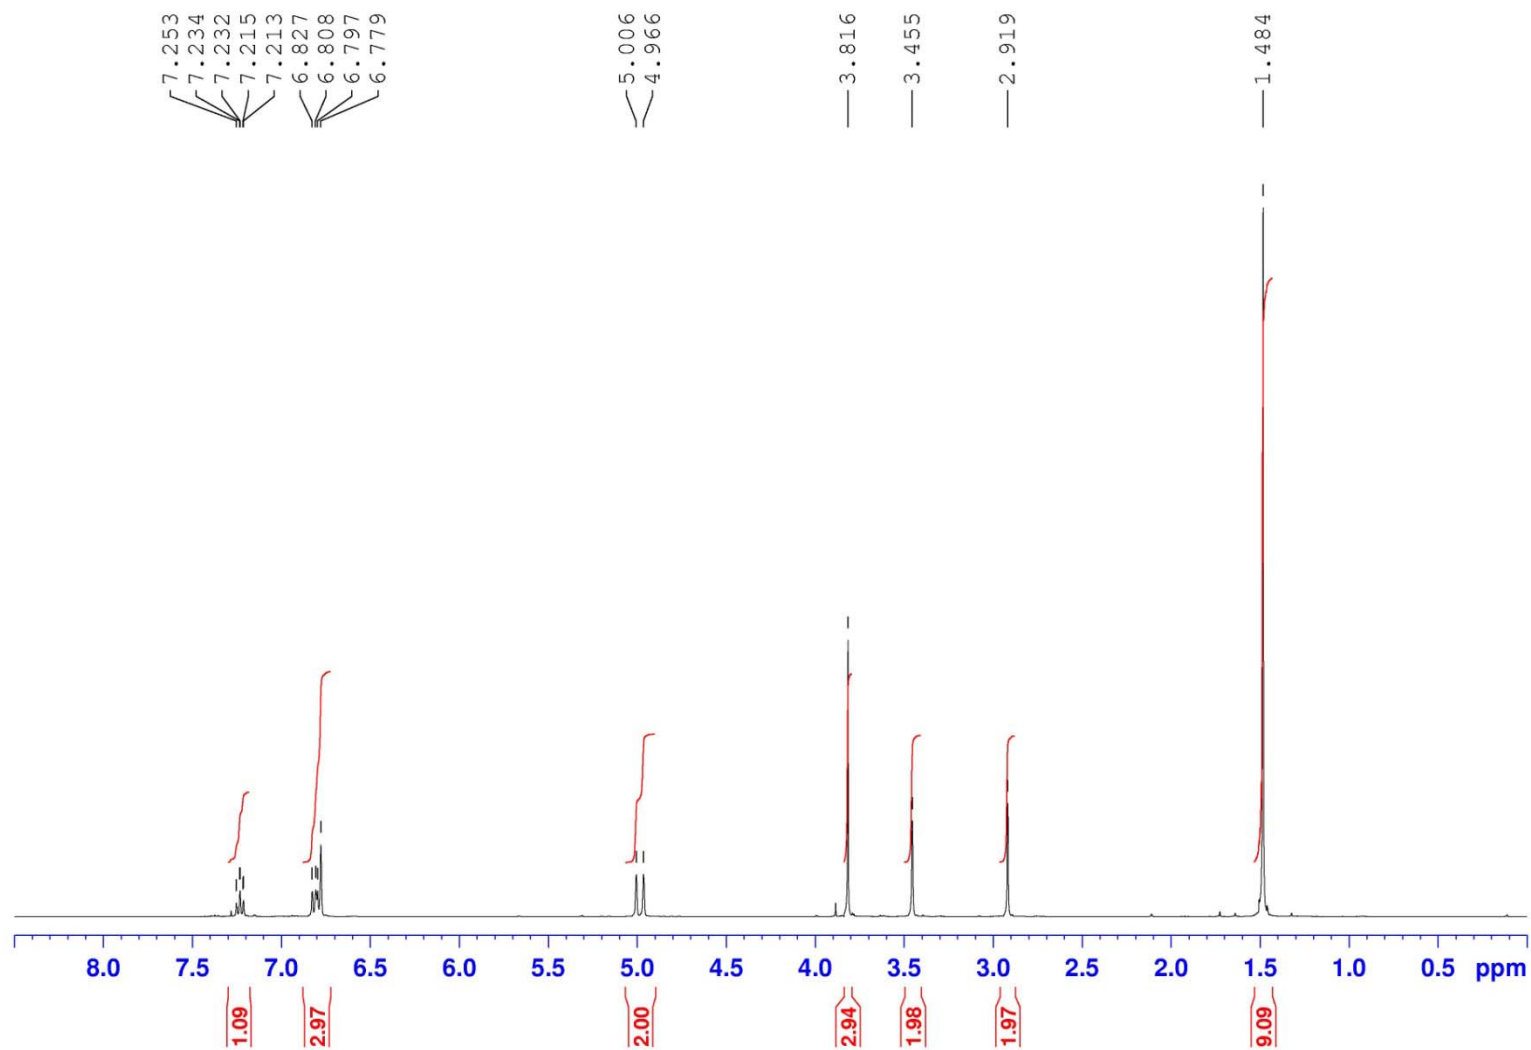

**<sup>13</sup>C NMR of 21b**

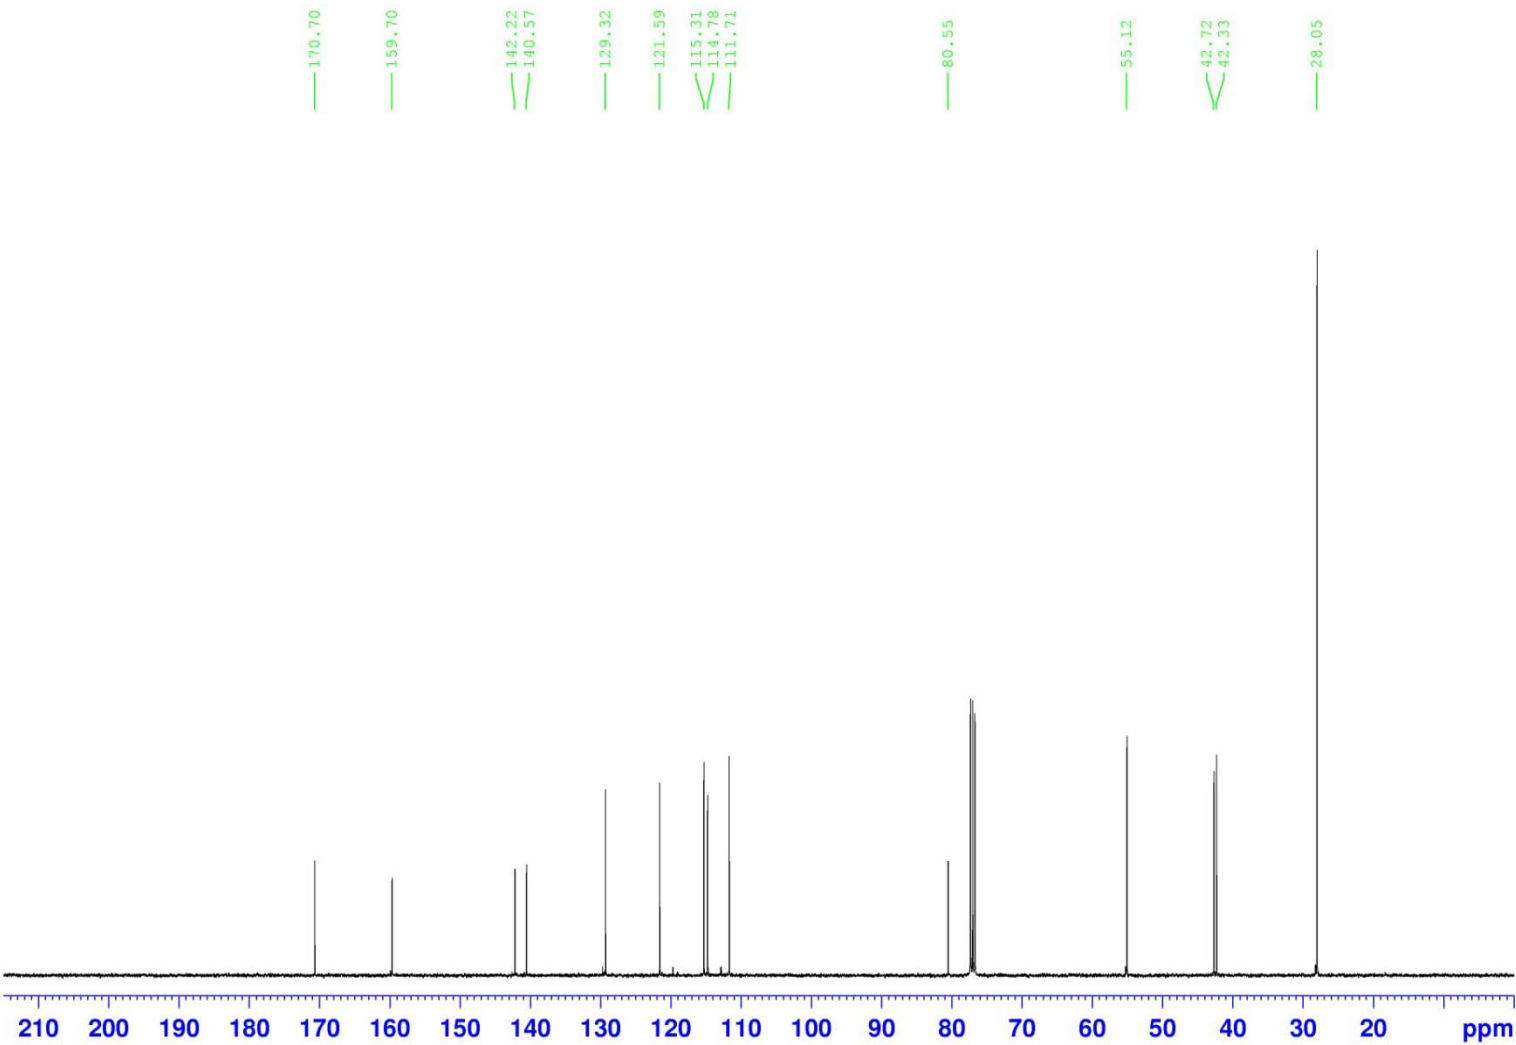

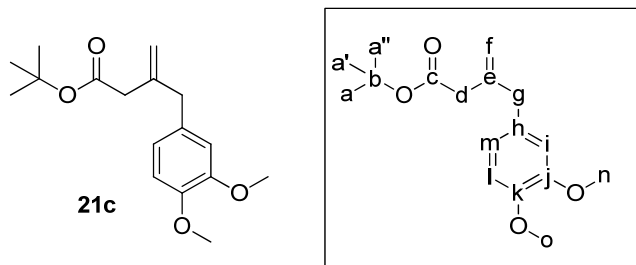

Following the general procedure for the preparation of *tert*-butyl esters through the synthesis of vinyl bromides followed by nickel-catalyzed substitution affords, after flash chromatography on silica gel (75–65:25–35 hexanes:dichloromethane), the title compound (36%, 2 steps) as a light yellow oil.

|                                                                             |                                                                                                                                                                                               |
|-----------------------------------------------------------------------------|-----------------------------------------------------------------------------------------------------------------------------------------------------------------------------------------------|
| <b>TLC analysis</b>                                                         | $R_f$ 0.3 (50:50 hexanes:dichloromethane)                                                                                                                                                     |
| <b><math>^1\text{H}</math> NMR (400 MHz, <math>\text{CDCl}_3</math>)</b>    | $\delta$ 6.85–6.75 (1H, m, i), 6.75–6.65 (2H, m, l,m), 4.97 and 4.93 (2H, s's, f), 3.87 (6H, s, n,o), 3.40 (2H, s, g), 2.90 (2H, s, d), 1.46 (9H, s, a,a',a'').                               |
| <b><math>^{13}\text{C}</math> NMR (100 MHz, <math>\text{CDCl}_3</math>)</b> | $\delta$ 170.74 (c), 148.85 (k), 147.54 (j), 142.66 (e), 131.51 (h), 121.16 (m), 114.95 (i), 112.29 (l), 111.15 (f), 80.53 (b), 55.90 (o), 55.80 (n), 42.29 (g), 42.25 (d), 28.05 (a,a',a''). |
| <b>IR (neat)</b>                                                            | 2978, 1725 (C=O stretch), 1647, 1599, 1584, 1488, 1454, 1366, 1256 (C-O stretch), 1139, 1050, 899, 779, 738, 694, 572 $\text{cm}^{-1}$ .                                                      |
| <b>HRMS (EI)</b>                                                            | Calcd. for $\text{C}_{17}\text{H}_{24}\text{O}_4$ : 292.1675, found 292.1684 $m/z$ .                                                                                                          |

**<sup>1</sup>H NMR of 21c**

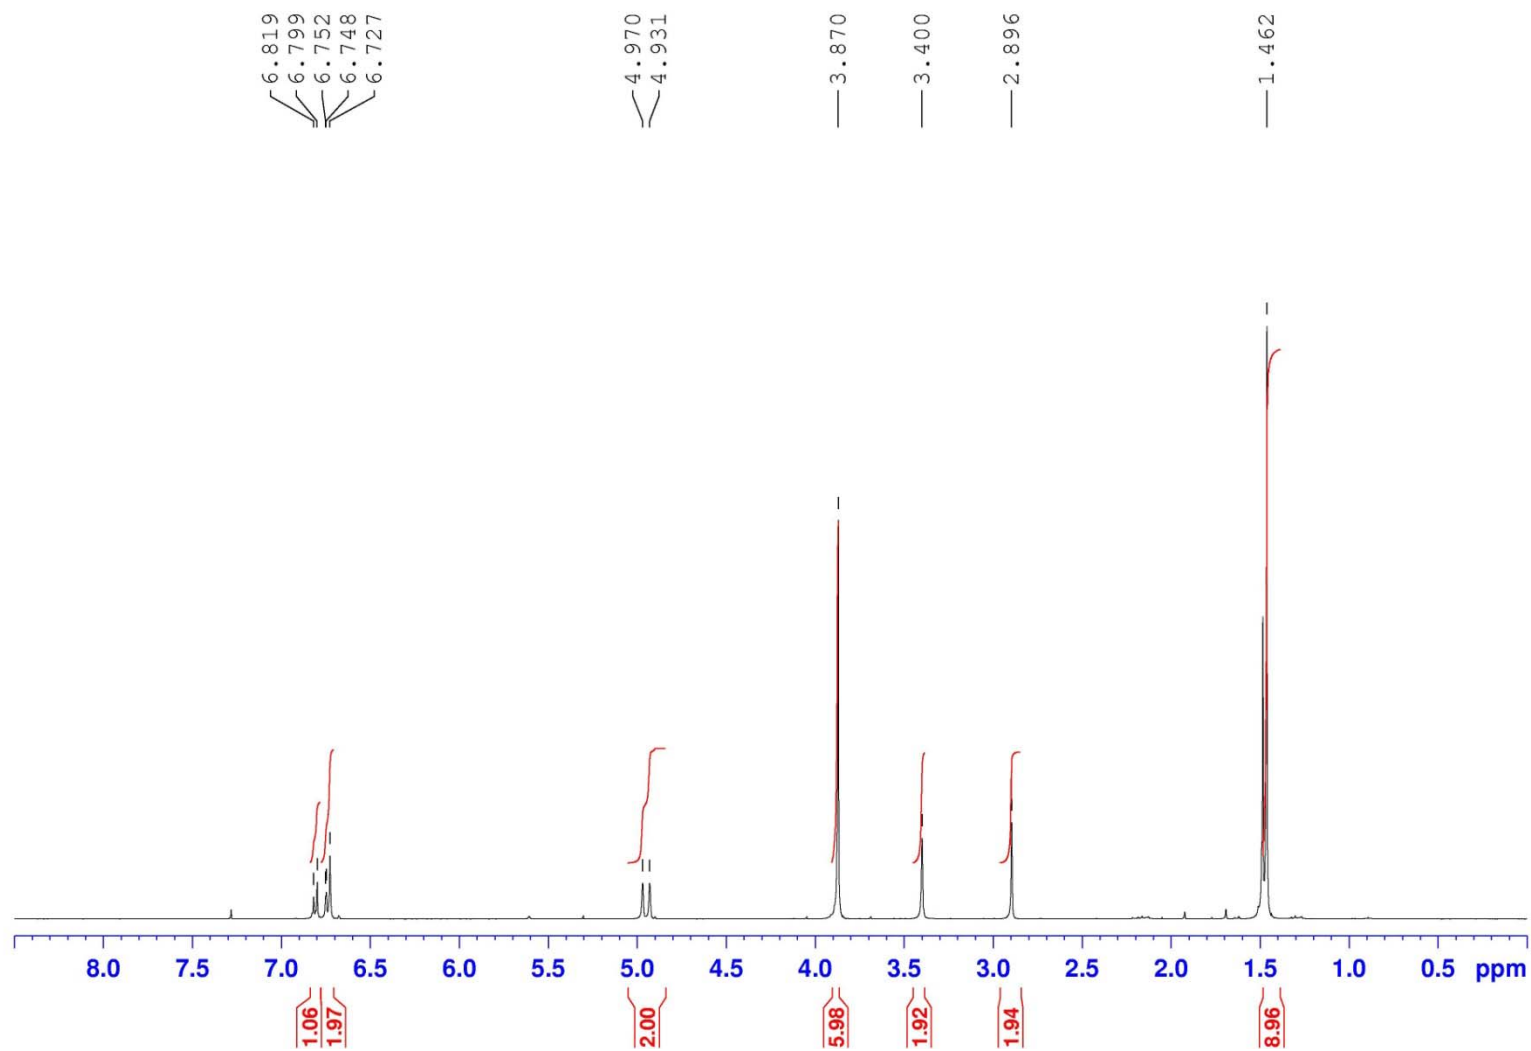

<sup>13</sup>C NMR of 21c

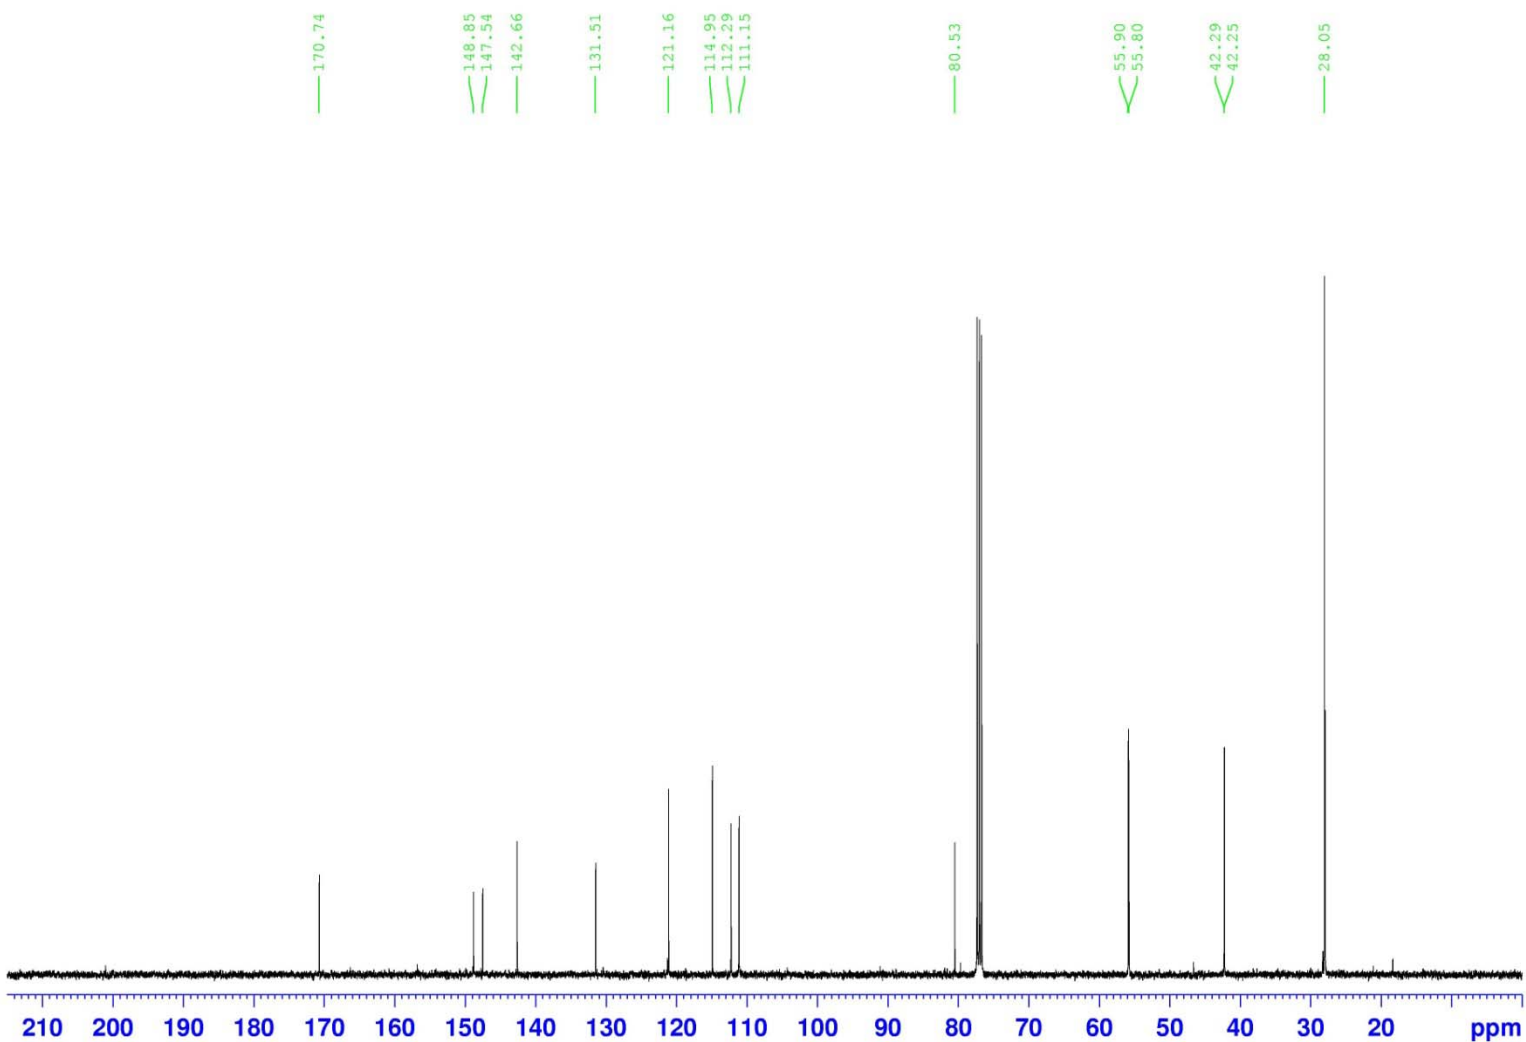

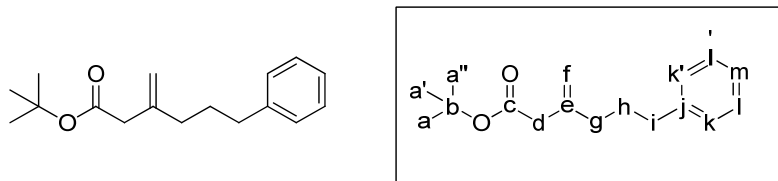

Following the general procedure for the preparation of *tert*-butyl esters through the synthesis of vinyl bromides followed by nickel-catalyzed substitution affords, after flash chromatography on silica gel (75–70:25–30 hexanes:dichloromethane), the title compound (57%, 2 steps) as a light yellow oil.

|                                                      |                                                                                                                                                                                                                          |
|------------------------------------------------------|--------------------------------------------------------------------------------------------------------------------------------------------------------------------------------------------------------------------------|
| <b>TLC analysis</b>                                  | <i>R<sub>f</sub></i> 0.60 (50:50 hexanes:dichloromethane)                                                                                                                                                                |
| <b><sup>1</sup>H NMR (300 MHz, CDCl<sub>3</sub>)</b> | δ 7.35–7.25 (2H, m, l,l'), 7.25–7.15 (3H, m, k,k',m), 4.94 and 4.93 (2H, s's, f), 2.97 (2H, s, d), 2.65 (2H, t, <i>J</i> = 7.6 Hz, i), 2.17 (2H, t, <i>J</i> = 7.5 Hz, g), 1.90–1.75 (2H, m, h), 1.46 (9H, s, a,a',a''). |
| <b><sup>13</sup>C NMR (75 MHz, CDCl<sub>3</sub>)</b> | δ 170.93 (c), 142.74 (j), 142.33 (e), 128.45 (k,k'), 128.31 (l,l'), 125.74 (m), 113.30 (f), 80.54 (b), 43.35 (d), 35.50 (g), 35.47 (i), 29.14 (h), 28.03 (a,a',a'').                                                     |
| <b>IR (neat)</b>                                     | 3026, 2933, 2863, 1726 (C=O stretch), 1645, 1496, 1366, 1255 (C-O stretch), 1140, 897, 839, 744, 695 cm <sup>-1</sup> .                                                                                                  |
| <b>HRMS (ESI)</b>                                    | Calcd. for C <sub>17</sub> H <sub>24</sub> NaO <sub>2</sub> (M+Na): 283.1674, found 283.1682 <i>m/z</i> .                                                                                                                |

**<sup>1</sup>H NMR of 3-methylidene-6-phenylhexanoic acid *tert*-butyl ester**

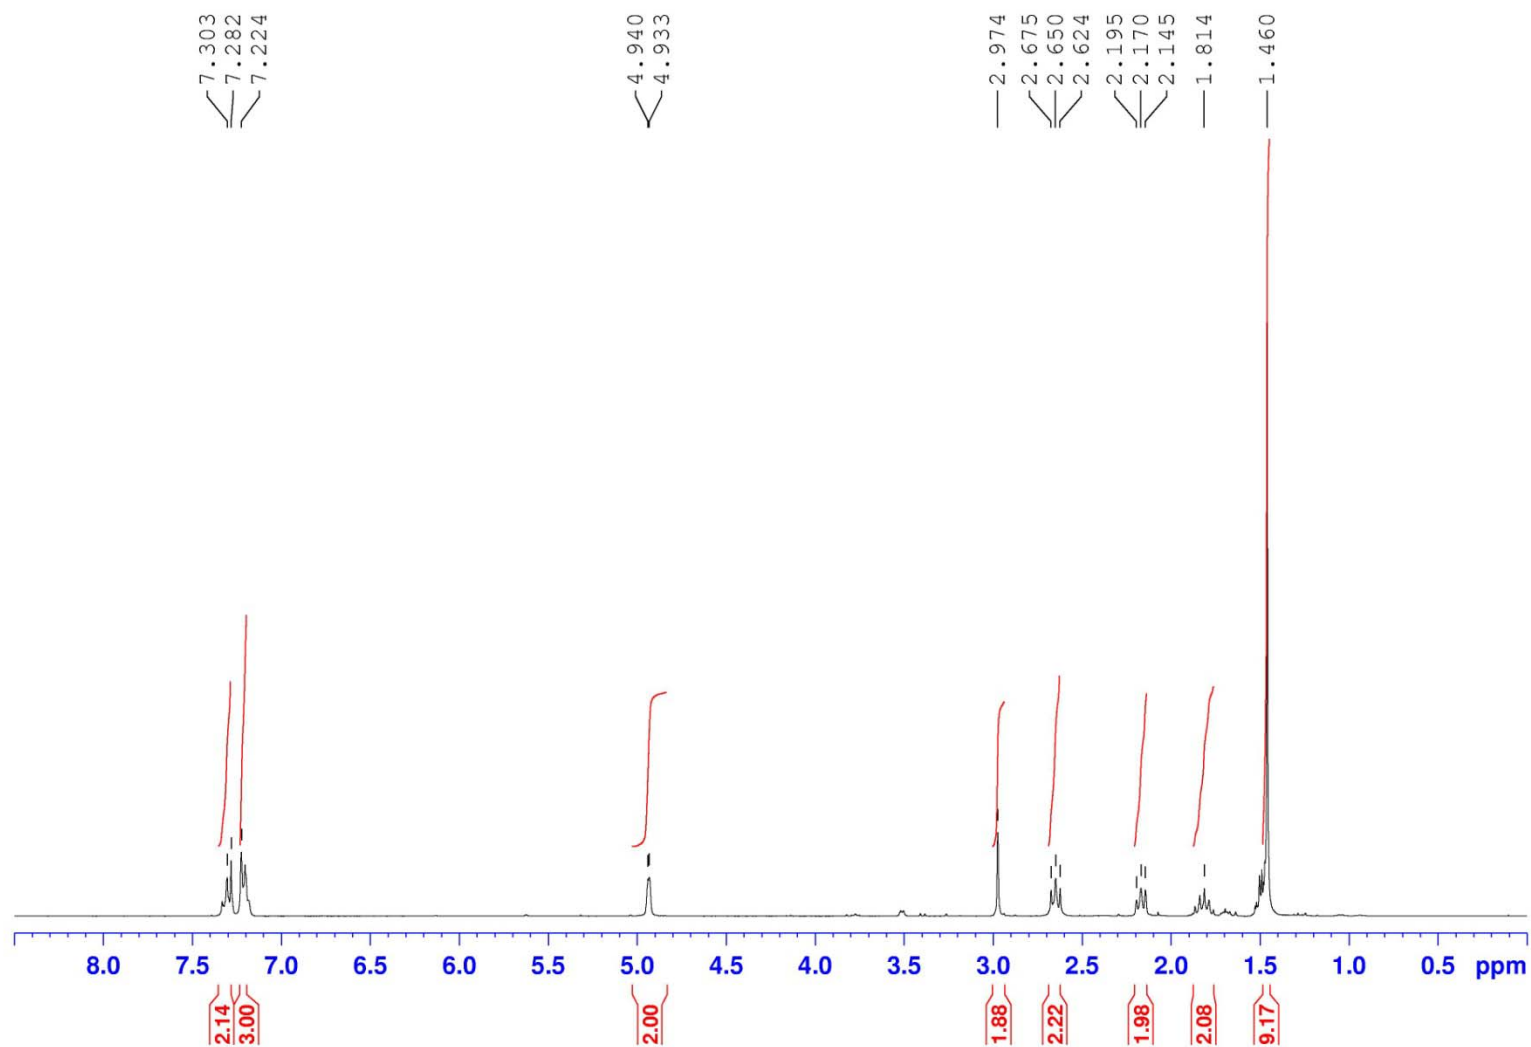

**<sup>13</sup>C NMR of 3-methylidene-6-phenylhexanoic acid *tert*-butyl ester**

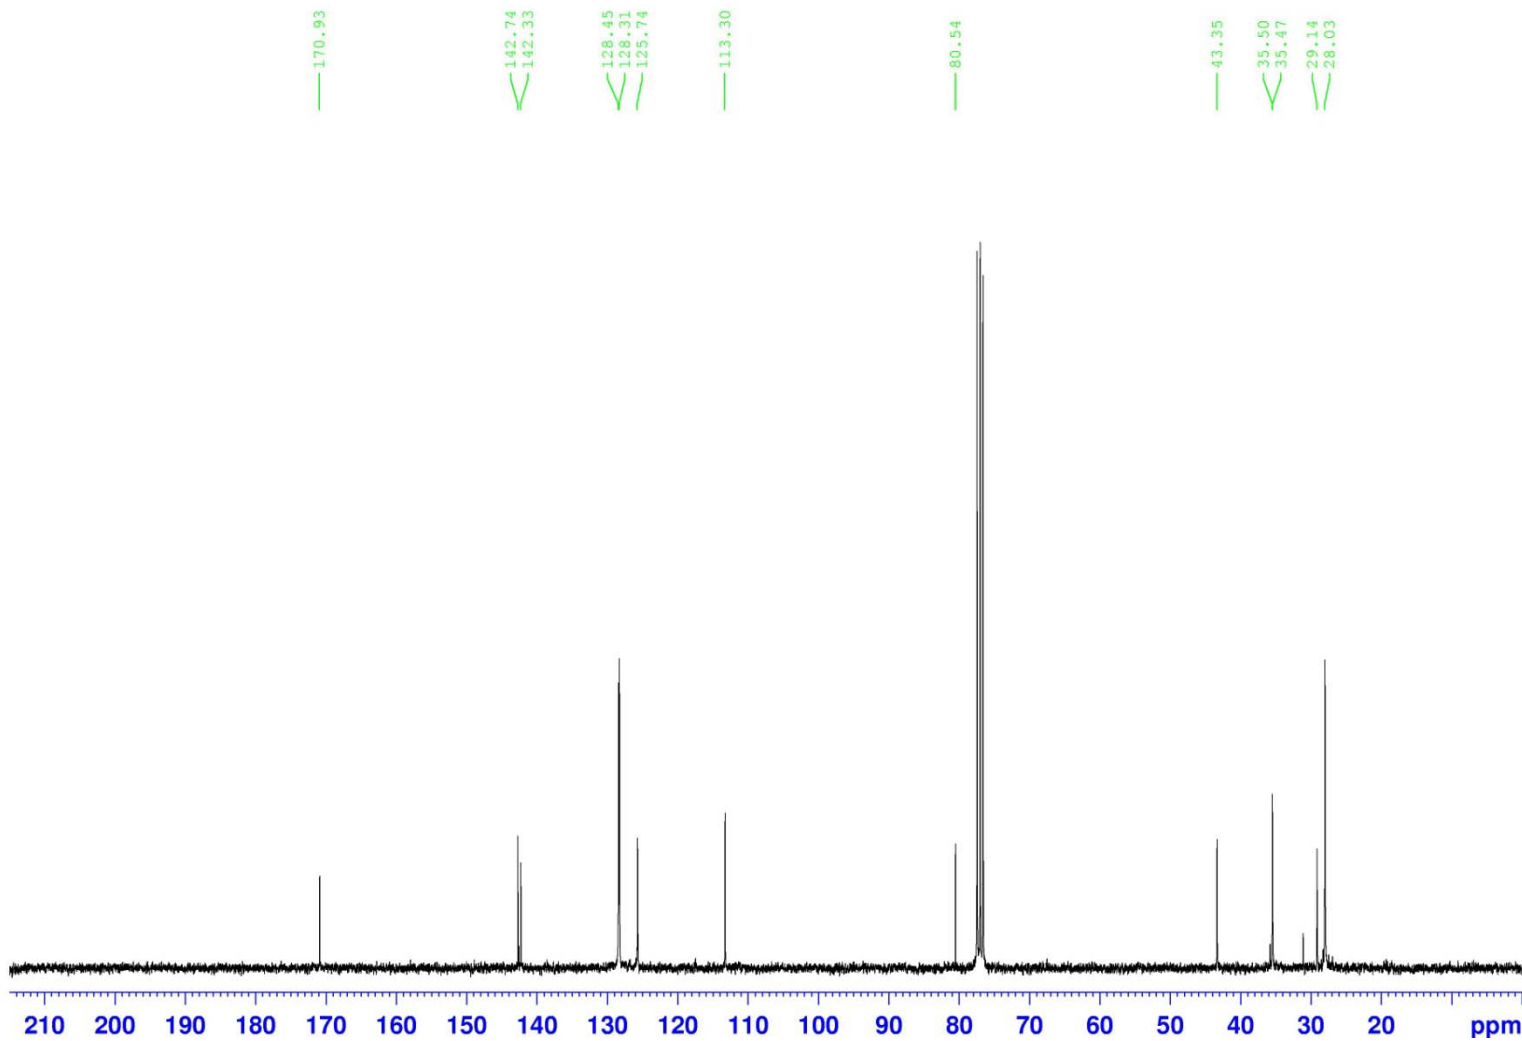



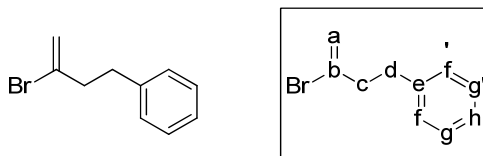

Following the general procedure for the preparation of vinyl bromides by the direct insertion of magnesium into benzylic chlorides affords, after flash chromatography on silica gel (hexanes), the title compound (55%) as a light brown oil.

|                                                                            |                                                                                                                                                                       |
|----------------------------------------------------------------------------|-----------------------------------------------------------------------------------------------------------------------------------------------------------------------|
| <b>TLC analysis</b>                                                        | $R_f$ 0.7 (hexanes)                                                                                                                                                   |
| <b><math>^1\text{H}</math> NMR (300 MHz, <math>\text{CDCl}_3</math>)</b>   | $\delta$ 7.37 (2H, t, $J$ = 7.9 Hz, g,g'), 7.30–7.20 (3H, m, f,f',h), 5.58 (1H, s, a), 5.47 (1H, s, a), 2.97 (2H, t, $J$ = 6.9 Hz, c), 2.80 (2H, t, $J$ = 8.1 Hz, d). |
| <b><math>^{13}\text{C}</math> NMR (75 MHz, <math>\text{CDCl}_3</math>)</b> | $\delta$ 140.42 (e), 133.62 (b), 128.56 (f,f'), 128.48 (g,g'), 126.26 (h), 117.20 (a), 43.36 (c), 34.44 (d).                                                          |
| <b>IR (neat)</b>                                                           | 3027, 2949, 2858, 1756, 1628, 1495, 1428, 1233, 1115, 1071 (C-Br stretch), 886, 766, 747, 696, 646, 559 $\text{cm}^{-1}$ .                                            |

**<sup>1</sup>H NMR of 2-bromo-4-phenylbutene**

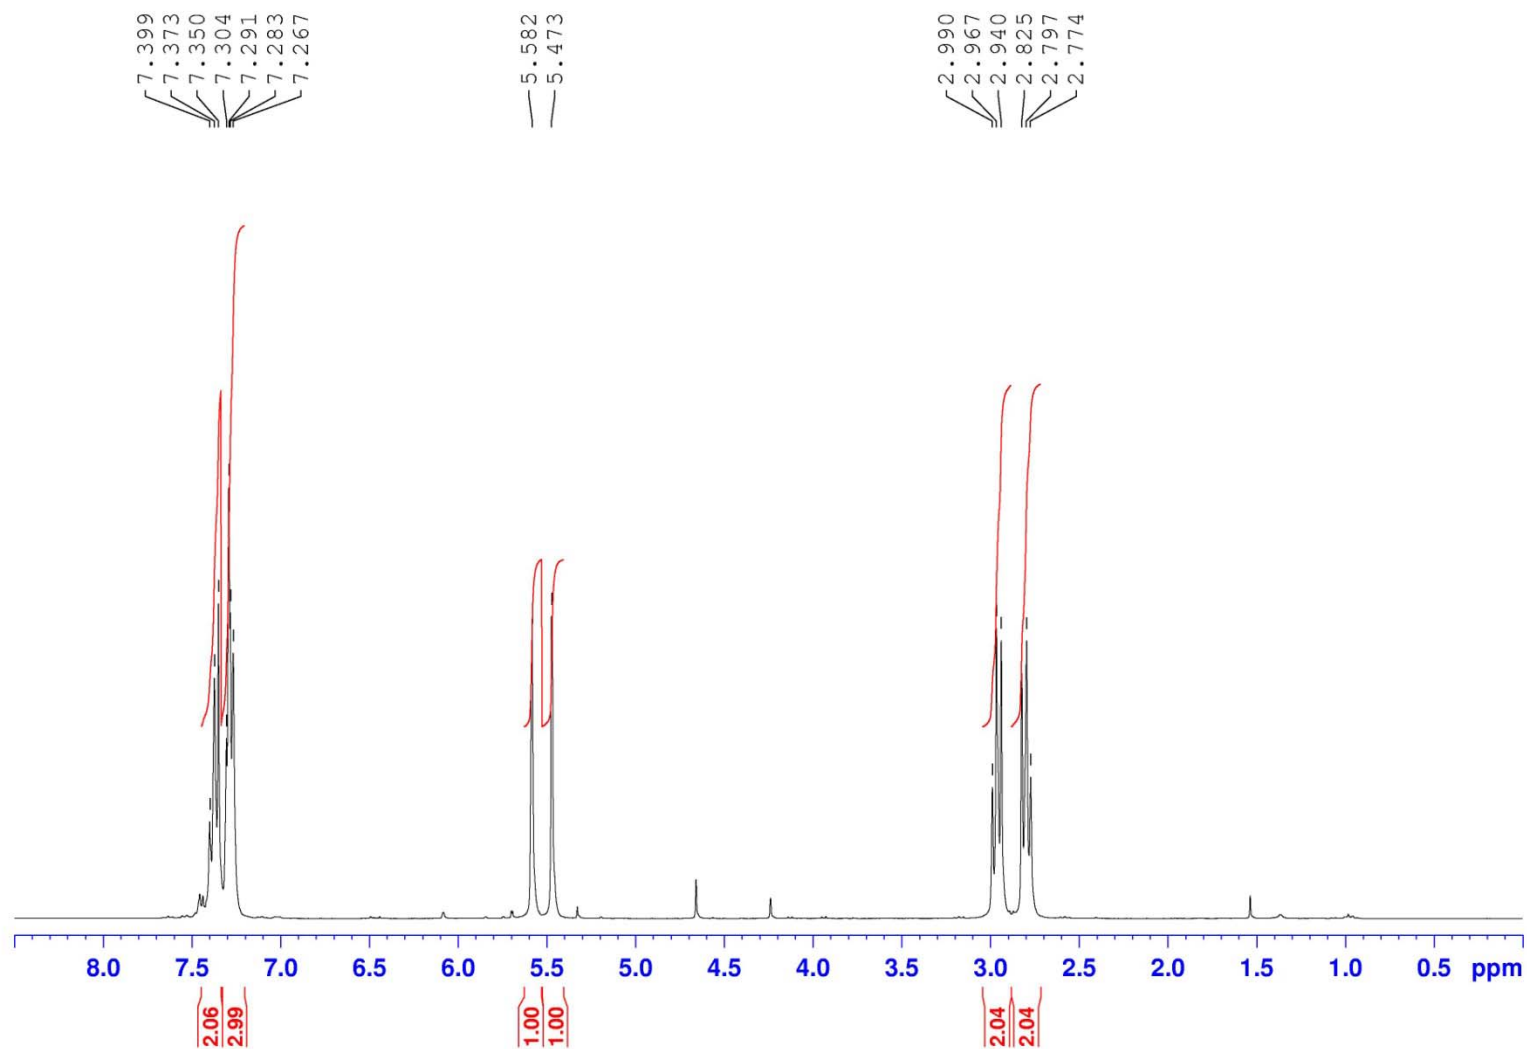

**<sup>13</sup>C NMR of 2-bromo-4-phenylbutene**

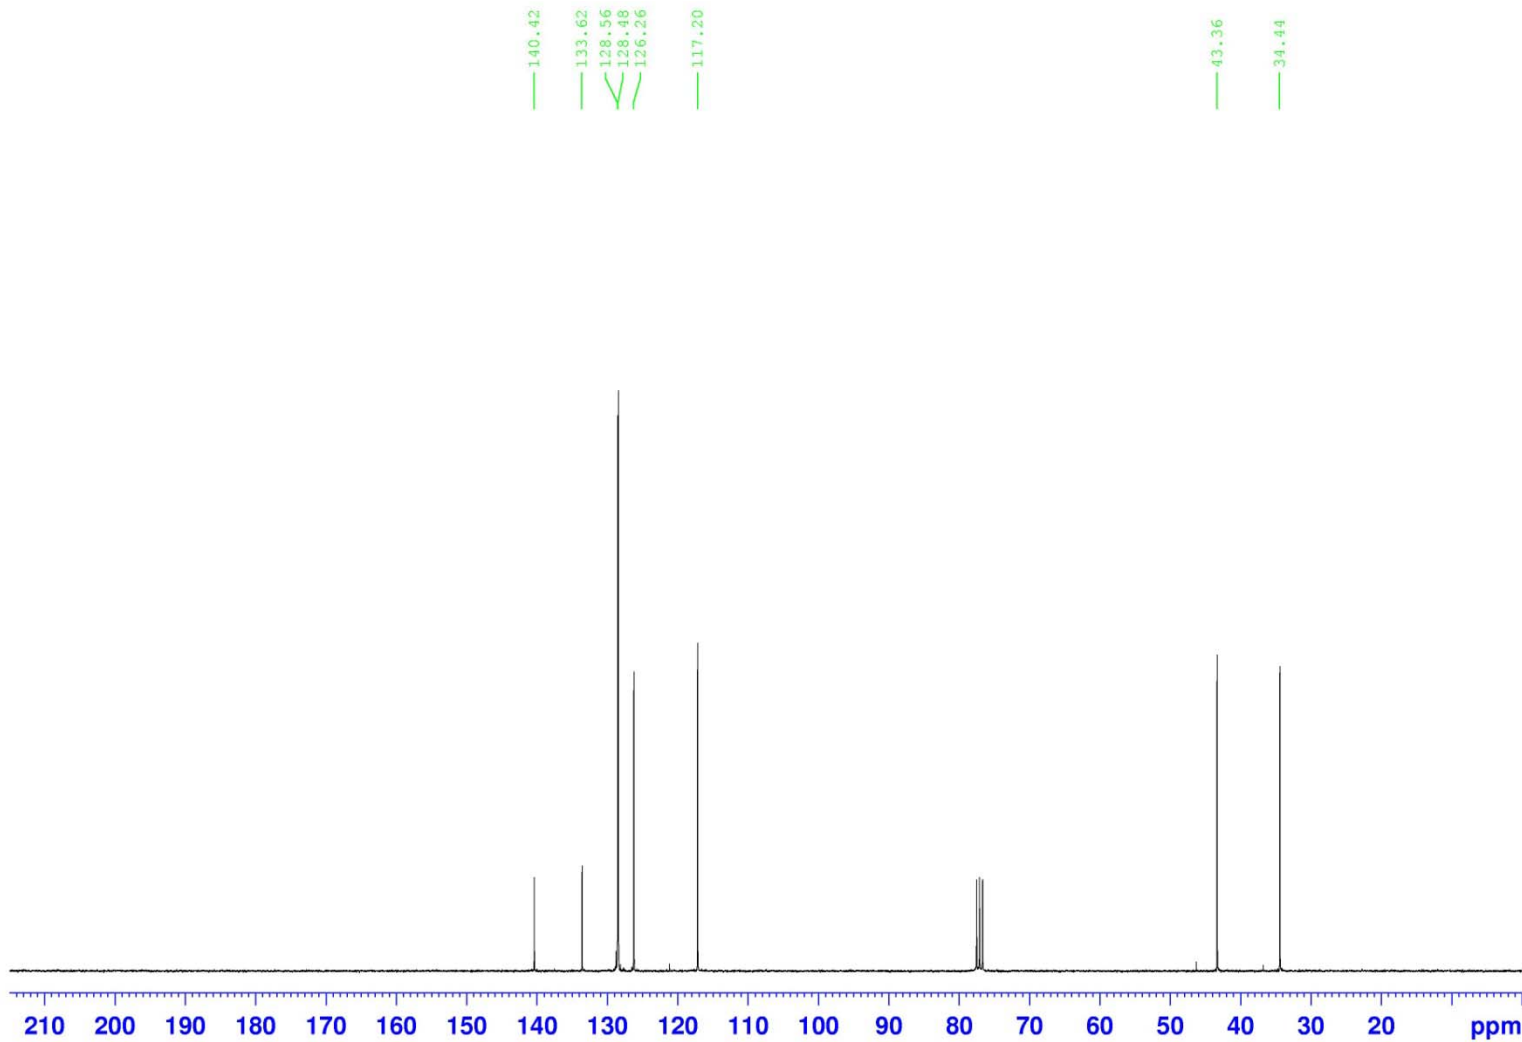

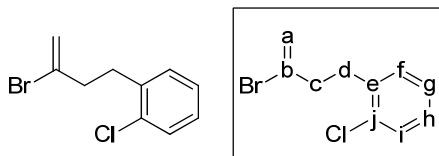

Following the general procedure for the preparation of vinyl bromides by the direct insertion of magnesium into benzylic chlorides affords, after flash chromatography on silica gel (hexanes), the title compound (59%) as a colorless oil.

|                                                                            |                                                                                                                                                                           |
|----------------------------------------------------------------------------|---------------------------------------------------------------------------------------------------------------------------------------------------------------------------|
| <b>TLC analysis</b>                                                        | $R_f$ 0.70 (hexanes)                                                                                                                                                      |
| <b><math>^1\text{H}</math> NMR (300 MHz, <math>\text{CDCl}_3</math>)</b>   | $\delta$ 7.40–7.35 (1H, m, i), 7.30–7.25 (1H, m, g), 7.25–7.15 (2H, m, f,h), 5.56 (1H, s, a), 5.44 (1H, s, a), 3.04 (2H, t, $J$ = 7.2 Hz, c), 2.77 (2H, $J$ = 8.0 Hz, d). |
| <b><math>^{13}\text{C}</math> NMR (75 MHz, <math>\text{CDCl}_3</math>)</b> | $\delta$ 137.89 (e), 133.94 (j), 133.20 (b), 130.74 (i), 129.55 (h), 127.79 (g), 126.80 (f), 117.36 (a), 41.28 (c), 32.39 (d).                                            |
| <b>IR (neat)</b>                                                           | 3027, 1628, 1474, 1282, 1189 (C-Cl stretch), 1052 (C-Br stretch), 1038, 890, 824, 751, 734, 684, 669, 550, 506 $\text{cm}^{-1}$ .                                         |
| <b>HRMS (EI)</b>                                                           | Calcd. for $\text{C}_{10}\text{H}_{10}\text{BrCl}$ : 243.9654, found 243.9660 $m/z$ .                                                                                     |

**<sup>1</sup>H NMR of 2-bromo-4-(2chlorophenyl)butene**

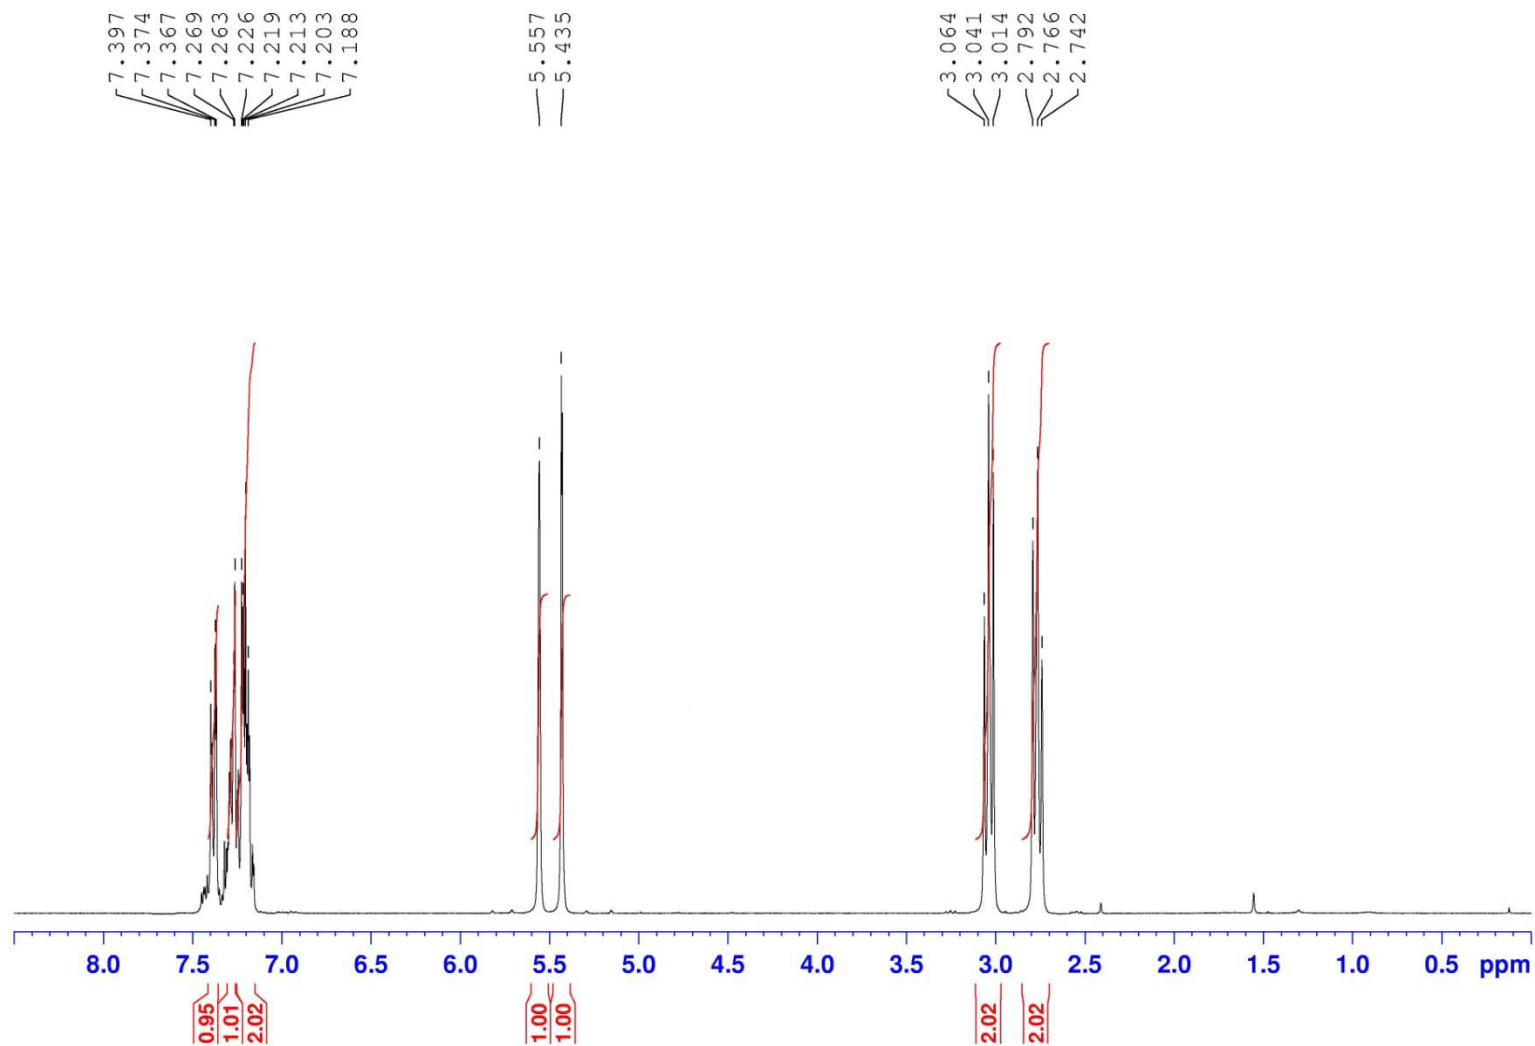

**<sup>13</sup>C NMR of 2-bromo-4-(2chlorophenyl)butene**

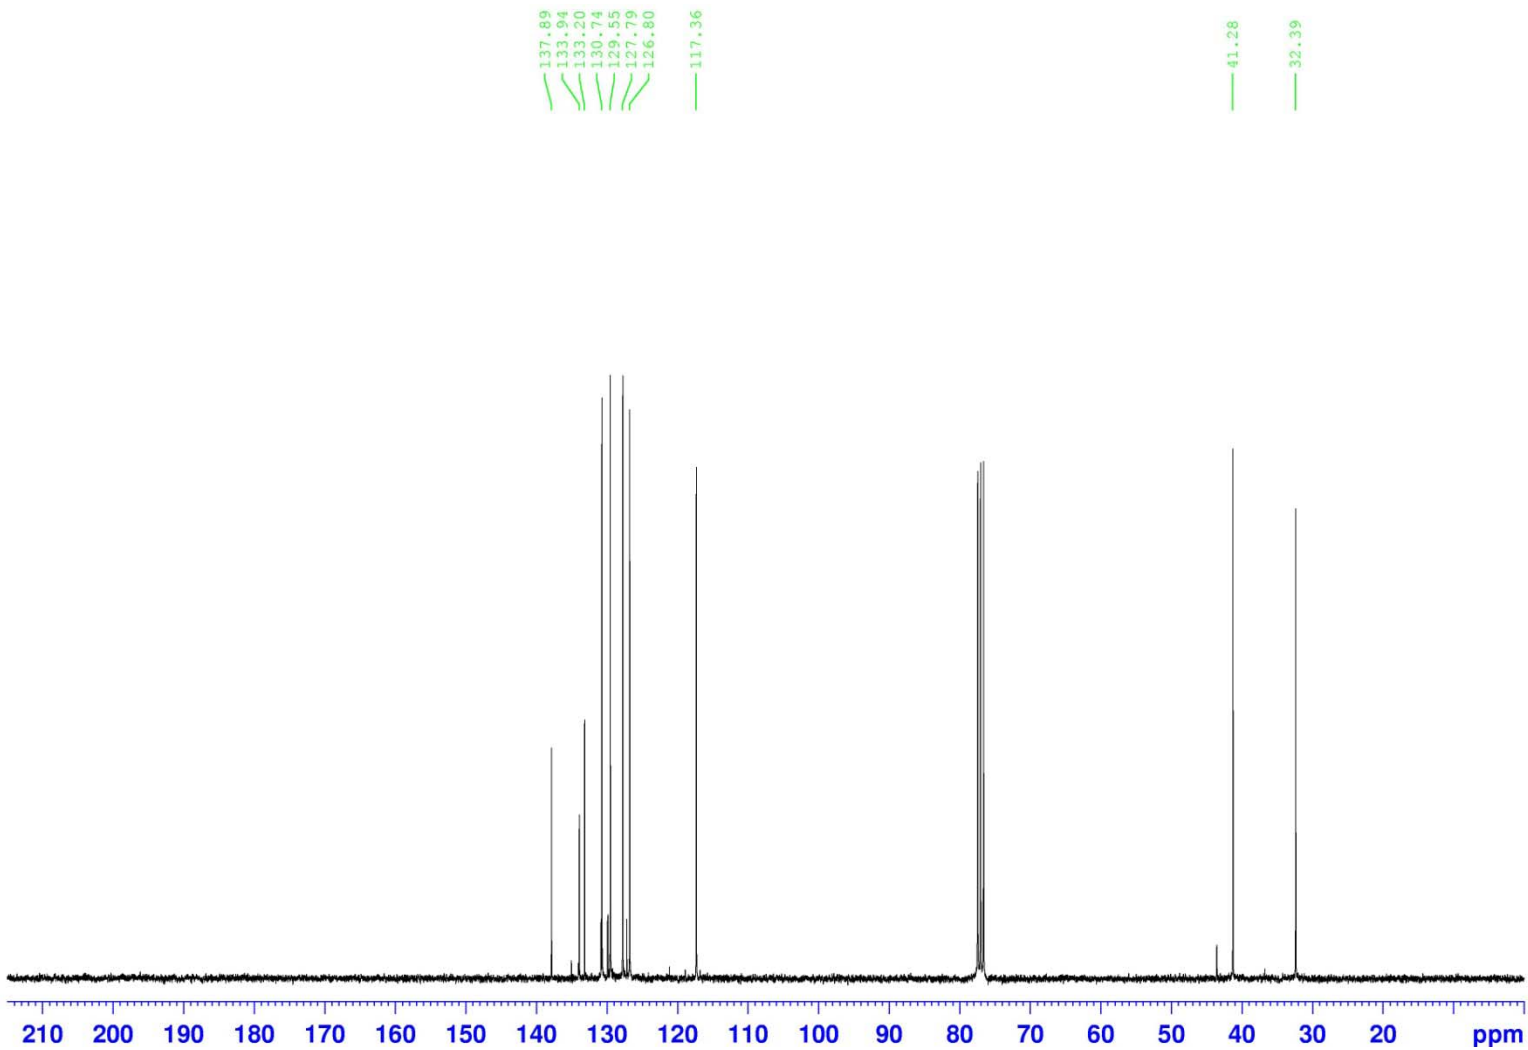

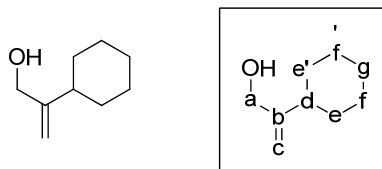

Following the general procedure for the preparation of allylic alcohols affords, after flash chromatography on silica gel (80:20 hexanes:ethyl acetate), the title compound (79%) as a colorless oil.

|                                                      |                                                                                                                                                                   |
|------------------------------------------------------|-------------------------------------------------------------------------------------------------------------------------------------------------------------------|
| <b>TLC analysis</b>                                  | <i>R<sub>f</sub></i> 0.35 (75:25 hexanes:ethyl acetate)                                                                                                           |
| <b><sup>1</sup>H NMR (300 MHz, CDCl<sub>3</sub>)</b> | δ 5.00 (1H, s, c), 4.86 (1H, s, c), 4.10 (2H, s, a), 2.00–1.85 (2H, m, a,OH), 1.85–1.70 (4H, m, e,e',f,f'), 1.70–1.65 (1H, m, g), 1.30–1.10 (5H, m, e,e',f,f',g). |
| <b><sup>13</sup>C NMR (75 MHz, CDCl<sub>3</sub>)</b> | δ 154.53 (b), 107.40 (c), 65.05 (a), 41.25 (d), 32.43 (e,e'), 26.70 (f,f'), 26.29 (g).                                                                            |
| <b>IR (neat)</b>                                     | 3306 (O-H stretch), 2850, 1649, 1060, 1019 (C-O stretch), 889, 625 cm <sup>-1</sup> .                                                                             |
| <b>HRMS (EI)</b>                                     | Calcd. for C <sub>9</sub> H <sub>16</sub> O: 140.1201, found 140.1204 <i>m/z</i> .                                                                                |

**<sup>1</sup>H NMR of 2-cyclohexyl-2-propenol**

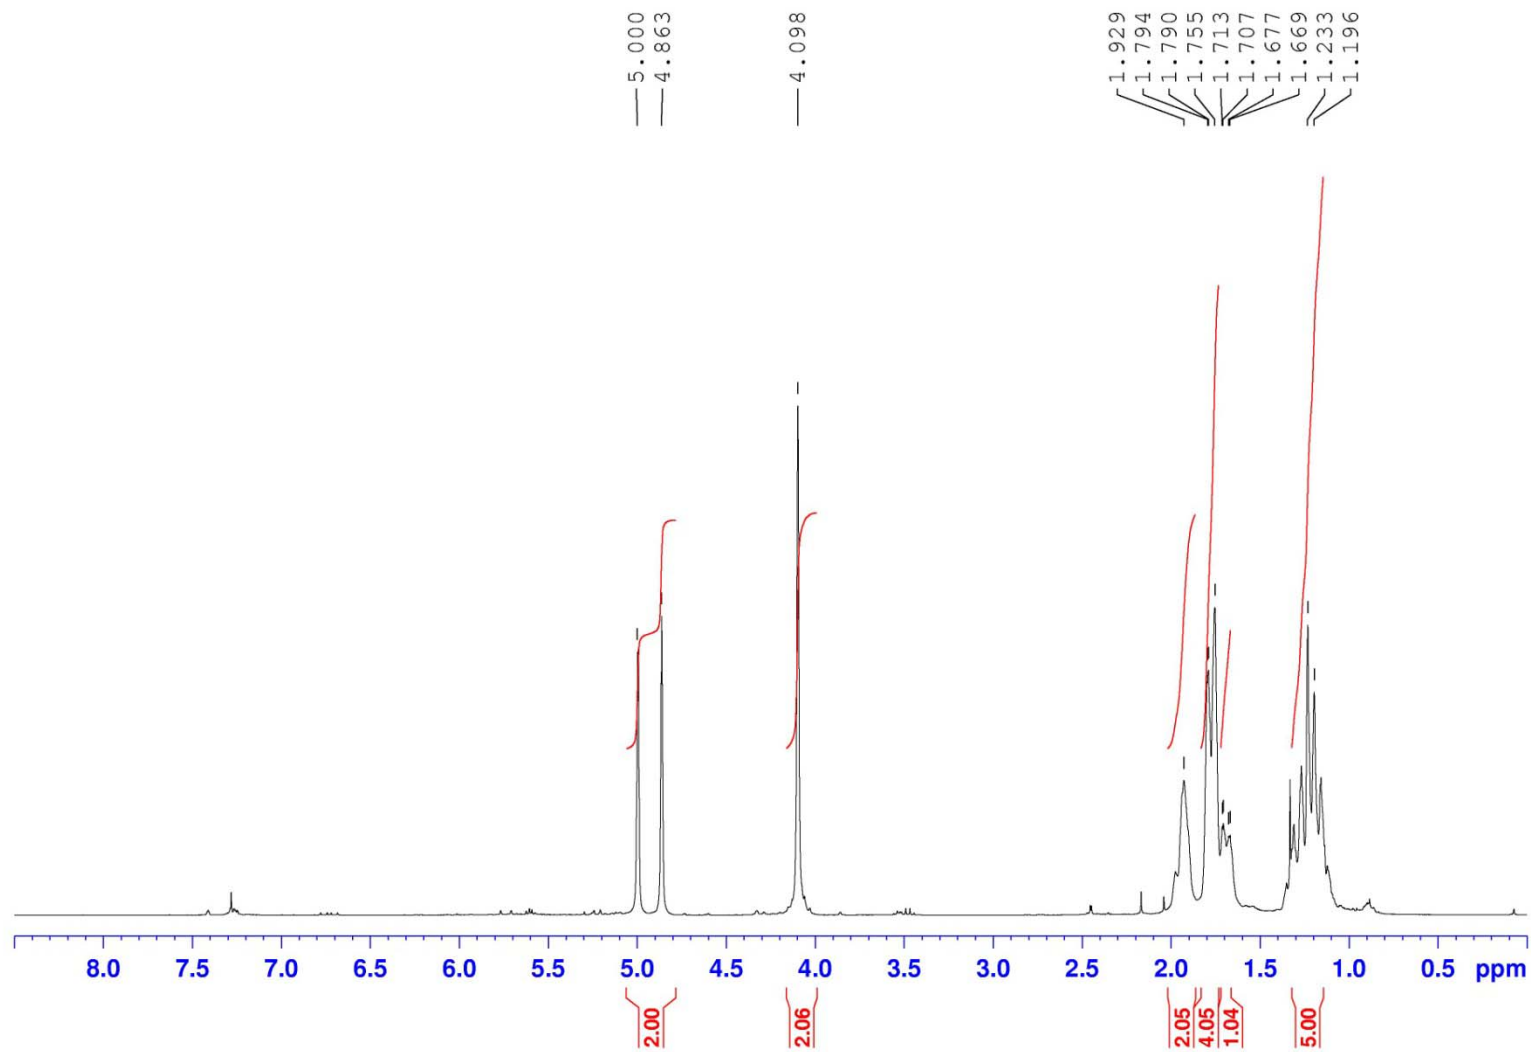



**<sup>13</sup>C NMR of 2-cyclohexyl-2-propenol**

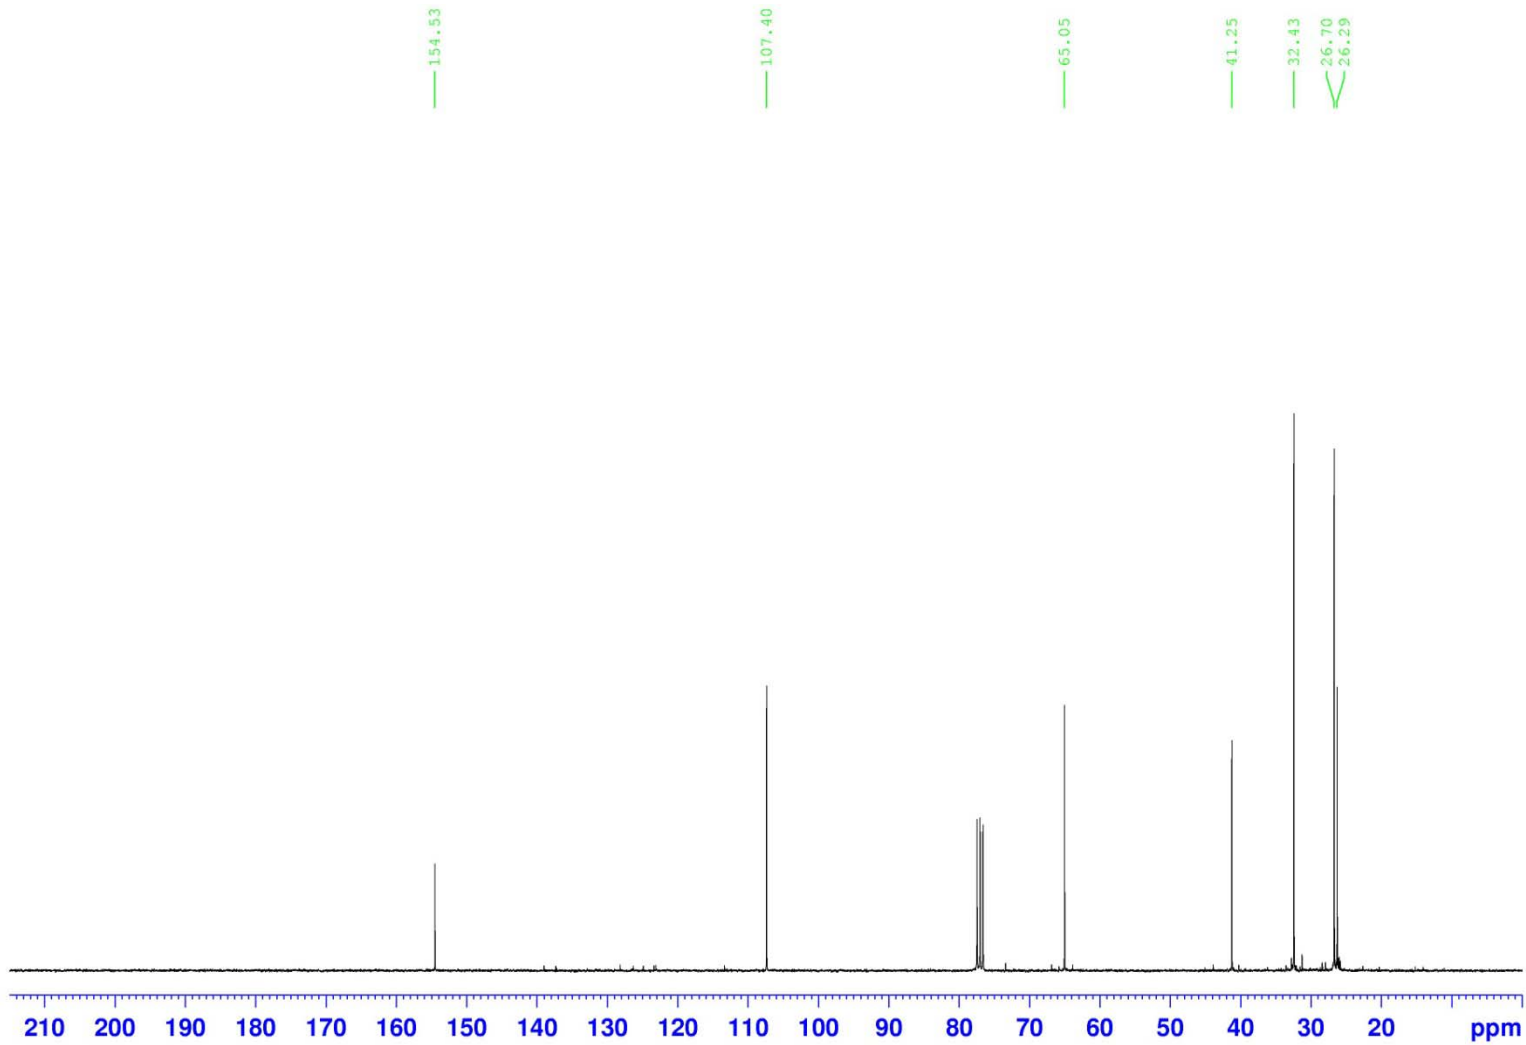

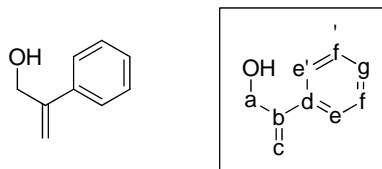

Following the general procedure for the preparation of allylic alcohols affords, after flash chromatography on silica gel (80:20 hexanes:ethyl acetate), the title compound (77%) as a light yellow oil.

|                                                      |                                                                                                                                      |
|------------------------------------------------------|--------------------------------------------------------------------------------------------------------------------------------------|
| <b>TLC analysis</b>                                  | <i>R<sub>f</sub></i> 0.30 (75:25 hexanes:ethyl acetate)                                                                              |
| <b><sup>1</sup>H NMR (300 MHz, CDCl<sub>3</sub>)</b> | δ 7.55–7.45 (2H, m, e,e'), 7.45–7.30 (3H, m, f,f',g), 5.50 (1H, s, c), 5.39 (1H, s, c), 4.55 (2H, s, a), 2.28 (1H, br s, OH).        |
| <b><sup>13</sup>C NMR (75 MHz, CDCl<sub>3</sub>)</b> | δ 147.30 (b), 138.60 (d), 128.53 (f,f'), 127.94 (g), 126.10 (e,e'), 112.55 (c), 64.87 (a).                                           |
| <b>IR (neat)</b>                                     | 3370 (O-H stretch), 2945, 2883, 1735, 1632, 1495, 1444, 1372, 1239, 1043 (C-O stretch), 1024, 902, 778, 706, 609 cm <sup>-1</sup> .. |

**<sup>1</sup>H NMR of 2-phenyl-2-propenol**

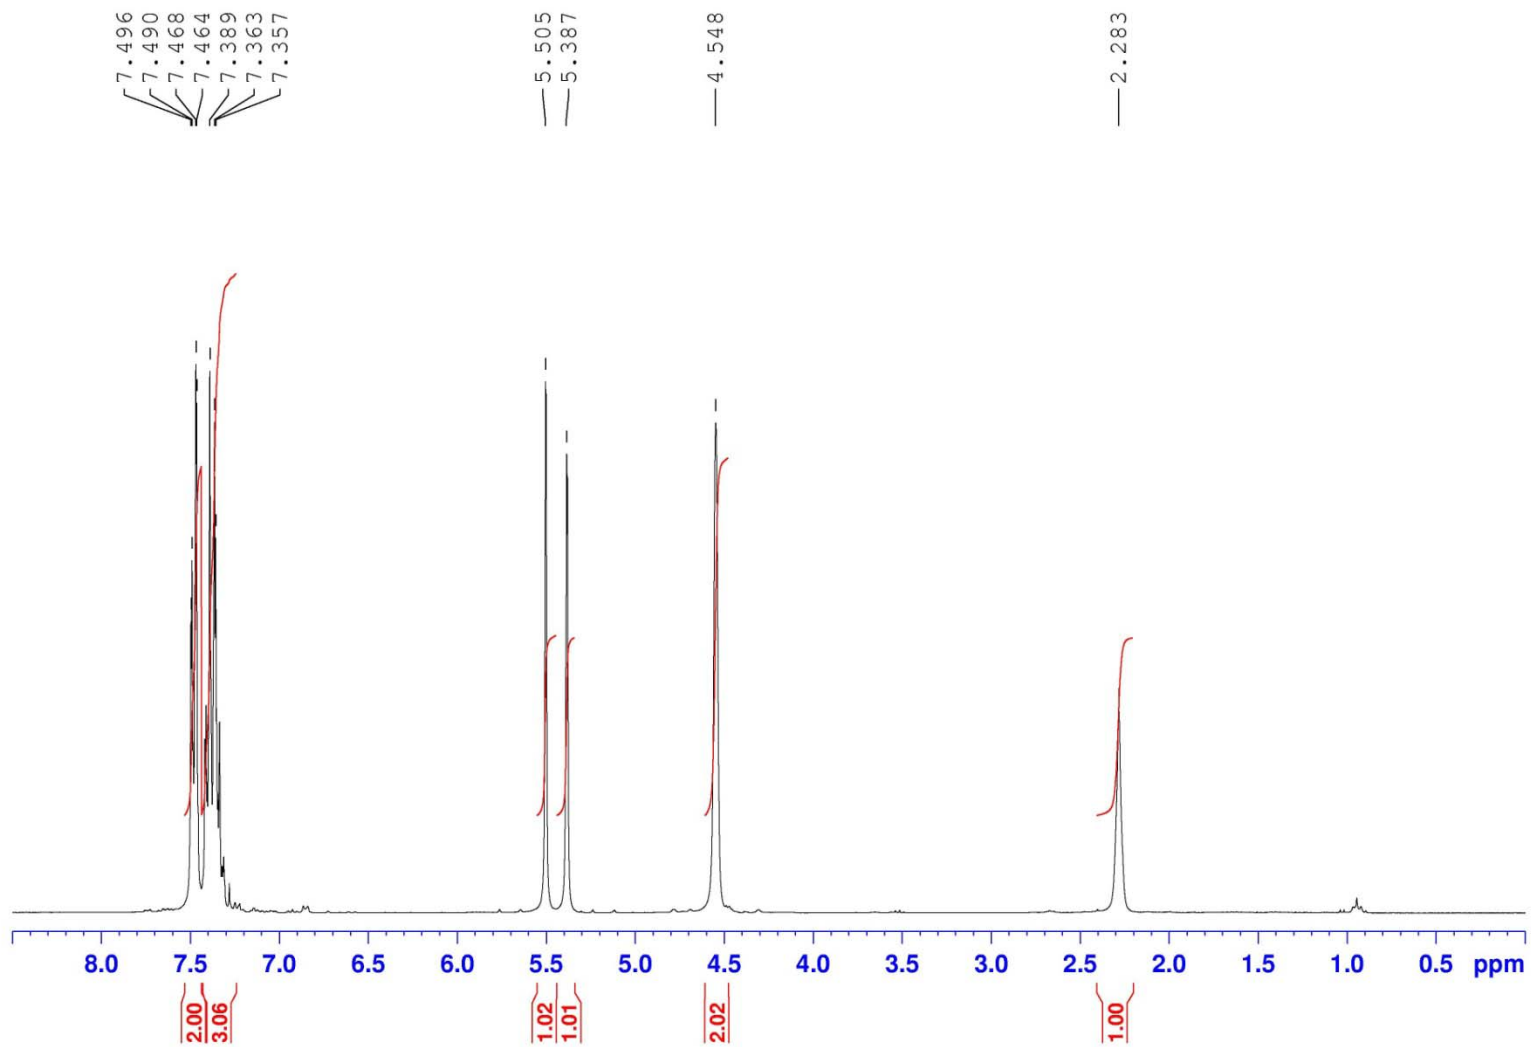

**<sup>13</sup>C NMR of 2-phenyl-2-propenol**

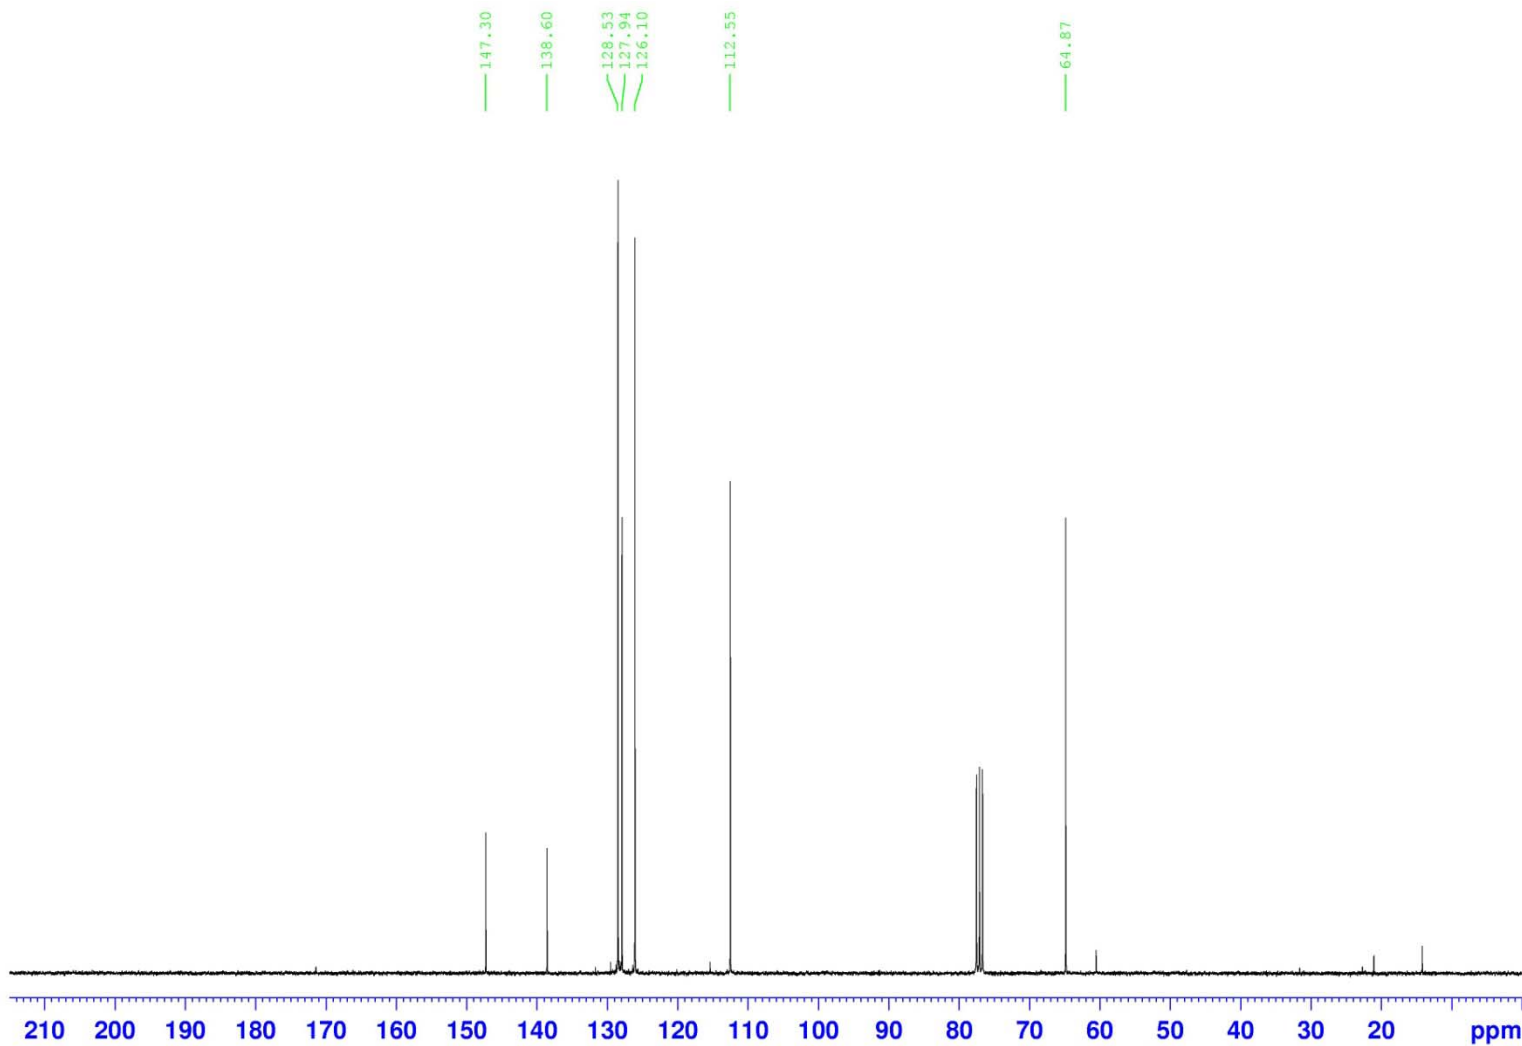

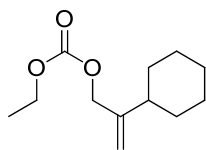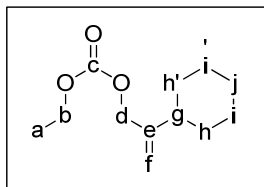

Following the general procedure for the preparation of allylic carbonates affords, after flash chromatography on silica gel (98–95:2–5 hexanes:ethyl acetate), the title compound (87%) as a colorless oil.

|                                                                            |                                                                                                                                                                                                                                     |
|----------------------------------------------------------------------------|-------------------------------------------------------------------------------------------------------------------------------------------------------------------------------------------------------------------------------------|
| <b>TLC analysis</b>                                                        | $R_f$ 0.75 (95:5 hexanes:ethyl acetate)                                                                                                                                                                                             |
| <b><math>^1\text{H}</math> NMR (300 MHz, <math>\text{CDCl}_3</math>)</b>   | $\delta$ 5.04 (1H, s, f), 4.96 (1H, s, f), 4.60 (2H, s, d), 4.20 (2H, q, $J = 7.1$ Hz, b), 2.00–1.90 (1H, m, g), 1.90–1.75 (4H, m, h,h',i,i'), 1.75–1.65 (1H, m, j), 1.31 (3H, t, $J = 7.1$ Hz, a), 1.30–1.10 (5H, m, h,h',i,i',j). |
| <b><math>^{13}\text{C}</math> NMR (75 MHz, <math>\text{CDCl}_3</math>)</b> | $\delta$ 155.07 (c), 148.66 (e), 111.07 (f), 69.35 (d), 63.92 (b), 41.19 (g), 32.09 (h,h'), 26.56 (i,i'), 26.21 (j), 14.25 (a).                                                                                                     |
| <b>IR (neat)</b>                                                           | 2926, 2853, 1742 (C=O stretch), 1649, 1448, 1374, 1241 (C-O stretch), 1004, 908, 890, 790, 630 $\text{cm}^{-1}$ .                                                                                                                   |
| <b>HRMS (CI)</b>                                                           | Calcd. for $\text{C}_{12}\text{H}_{21}\text{O}_3$ (M+H): 213.1491, found 213.1493 $m/z$ .                                                                                                                                           |

**<sup>1</sup>H NMR of 2-cyclohexylallyl ethyl carbonate**

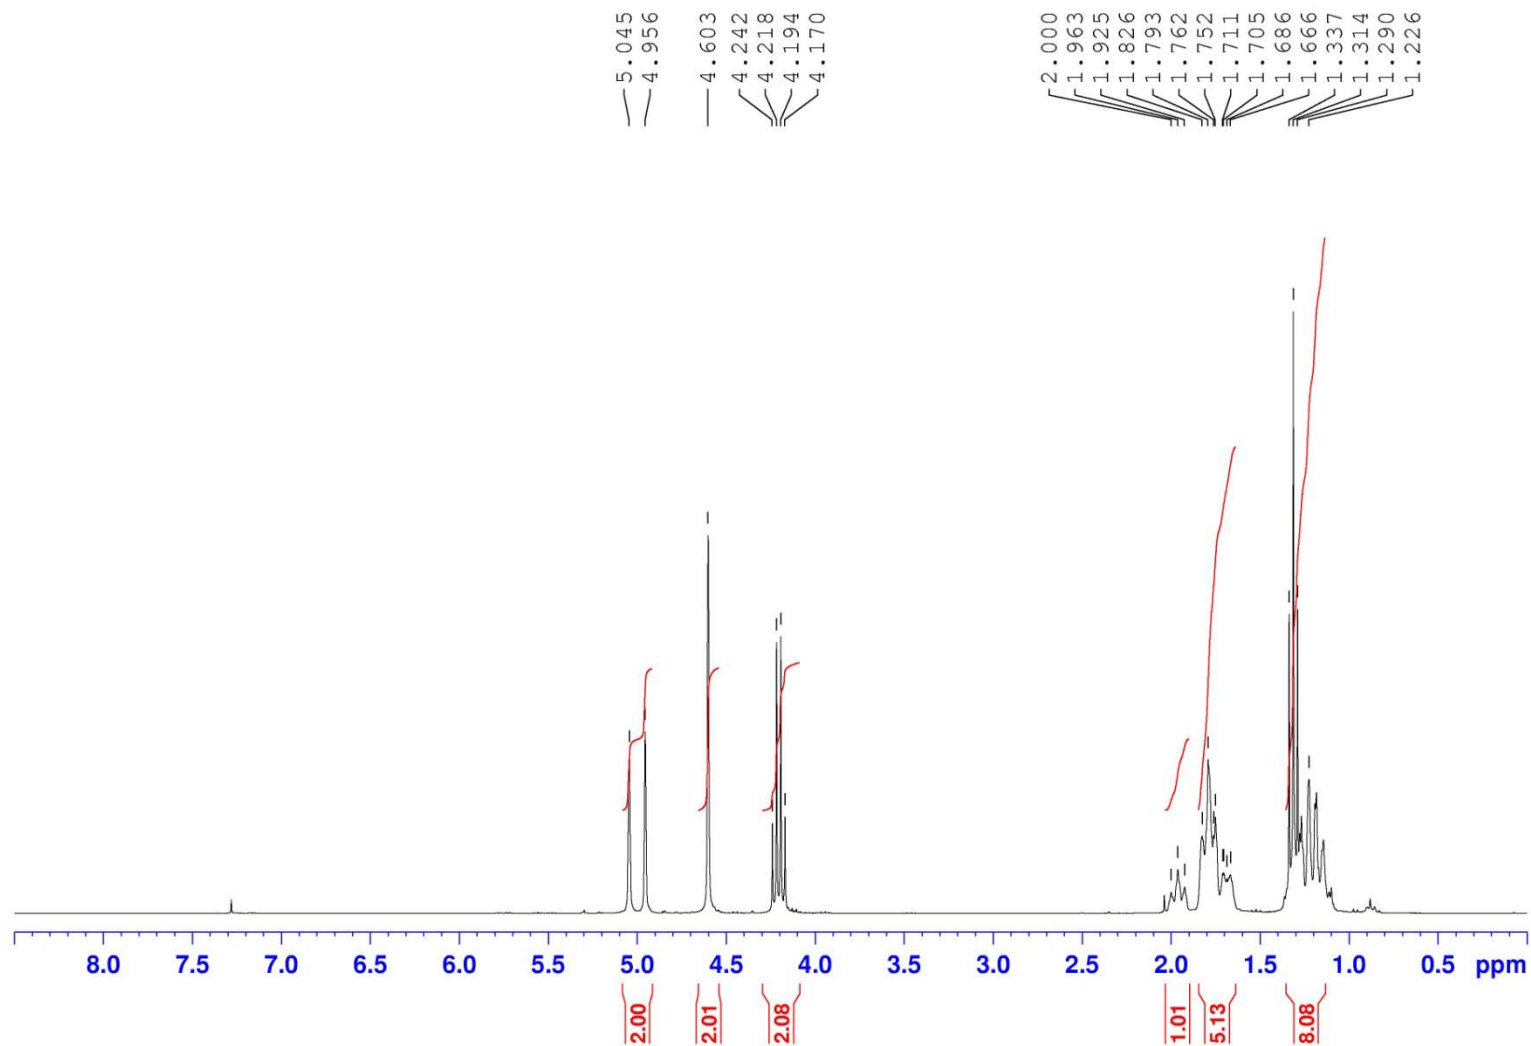

**<sup>13</sup>C NMR of 2-cyclohexylallyl ethyl carbonate**

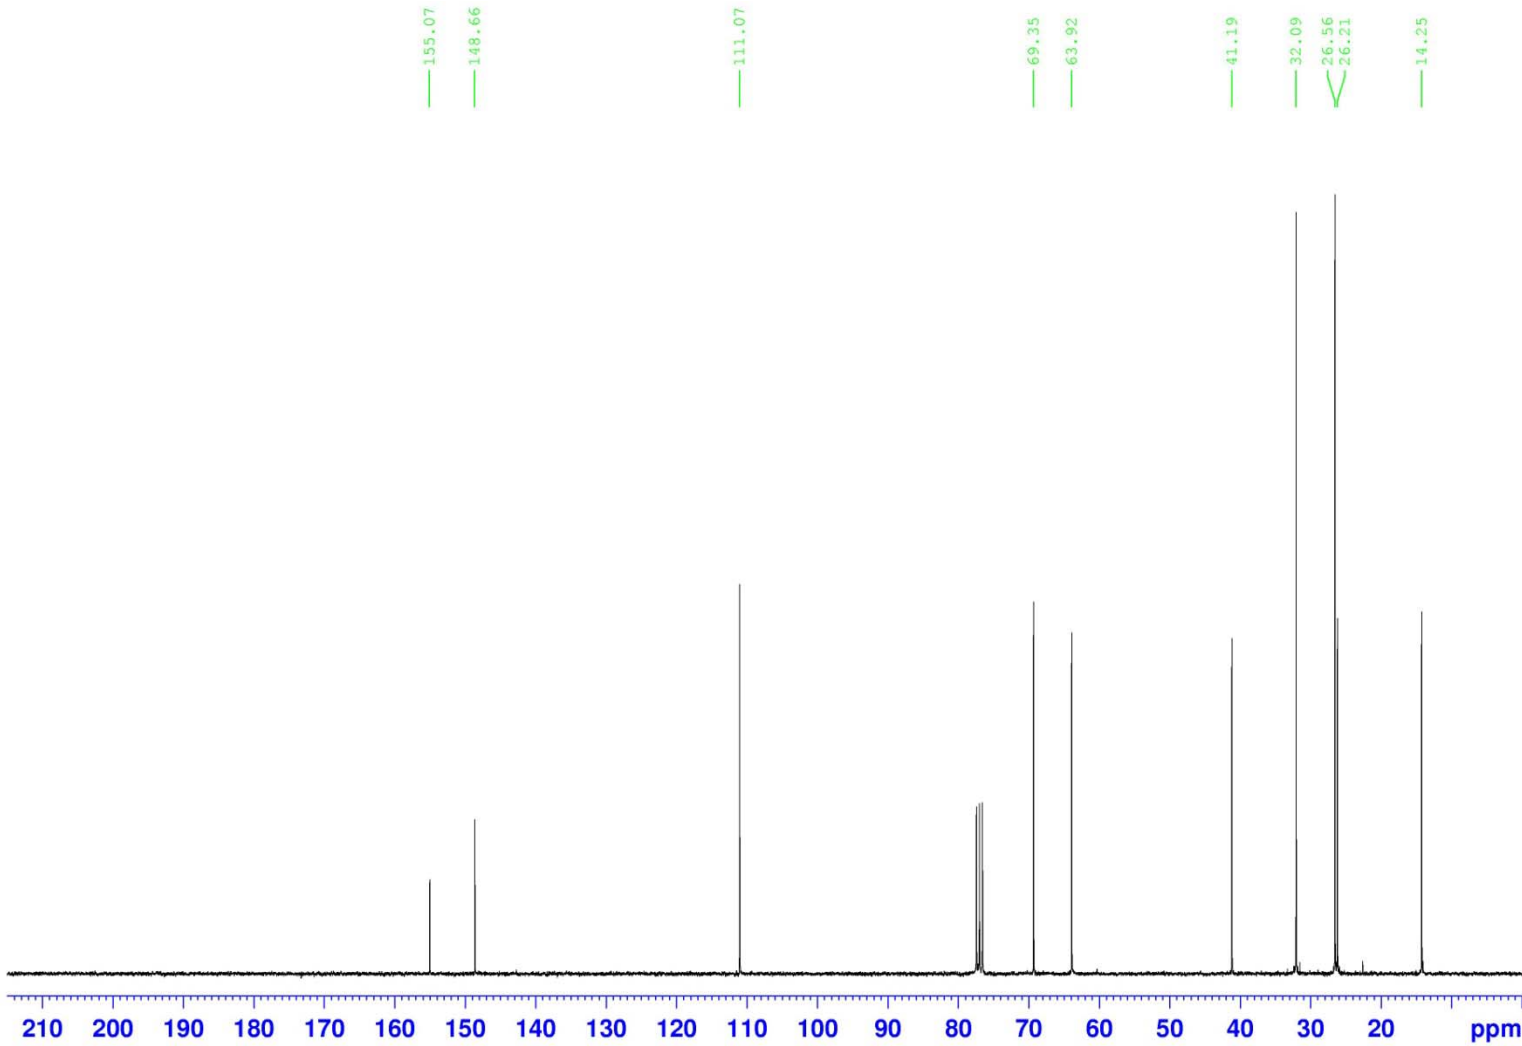

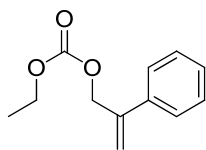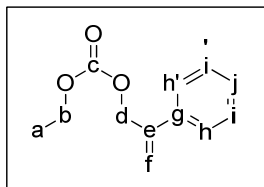

Following the general procedure for the preparation of allylic carbonates affords, after flash chromatography on silica gel ((98–95:2–5 hexanes:ethyl acetate), the title compound (84%) as a colorless oil.

|                                                                            |                                                                                                                                                                               |
|----------------------------------------------------------------------------|-------------------------------------------------------------------------------------------------------------------------------------------------------------------------------|
| <b>TLC analysis</b>                                                        | $R_f$ 0.75 (95:5 hexanes:ethyl acetate)                                                                                                                                       |
| <b><math>^1\text{H}</math> NMR (300 MHz, <math>\text{CDCl}_3</math>)</b>   | $\delta$ 7.50–7.45 (2H, m, h,h'), 7.45–7.30 (3H, m, i,i',j), 5.60 (1H, s, f), 5.45 (1H, s, f), 5.06 (2H, s, d), 4.23 (2H, q, $J$ = 7.1 Hz, b), 1.33 (3H, t, $J$ = 7.1 Hz, a). |
| <b><math>^{13}\text{C}</math> NMR (75 MHz, <math>\text{CDCl}_3</math>)</b> | $\delta$ 155.06 (c), 142.15 (e), 137.86 (g), 128.54 (i,i'), 128.14 (j), 126.04 (h,h'), 115.62 (f), 68.87 (d), 64.15 (b), 14.25 (a).                                           |
| <b>IR (neat)</b>                                                           | IR (neat) 2984, 1740 (C=O stretch), 1634, 1375, 1242 (C-O stretch), 1006, 910, 872, 789, 705, 547 $\text{cm}^{-1}$ .                                                          |



**<sup>1</sup>H NMR of 2-phenylallyl ethyl carbonate**

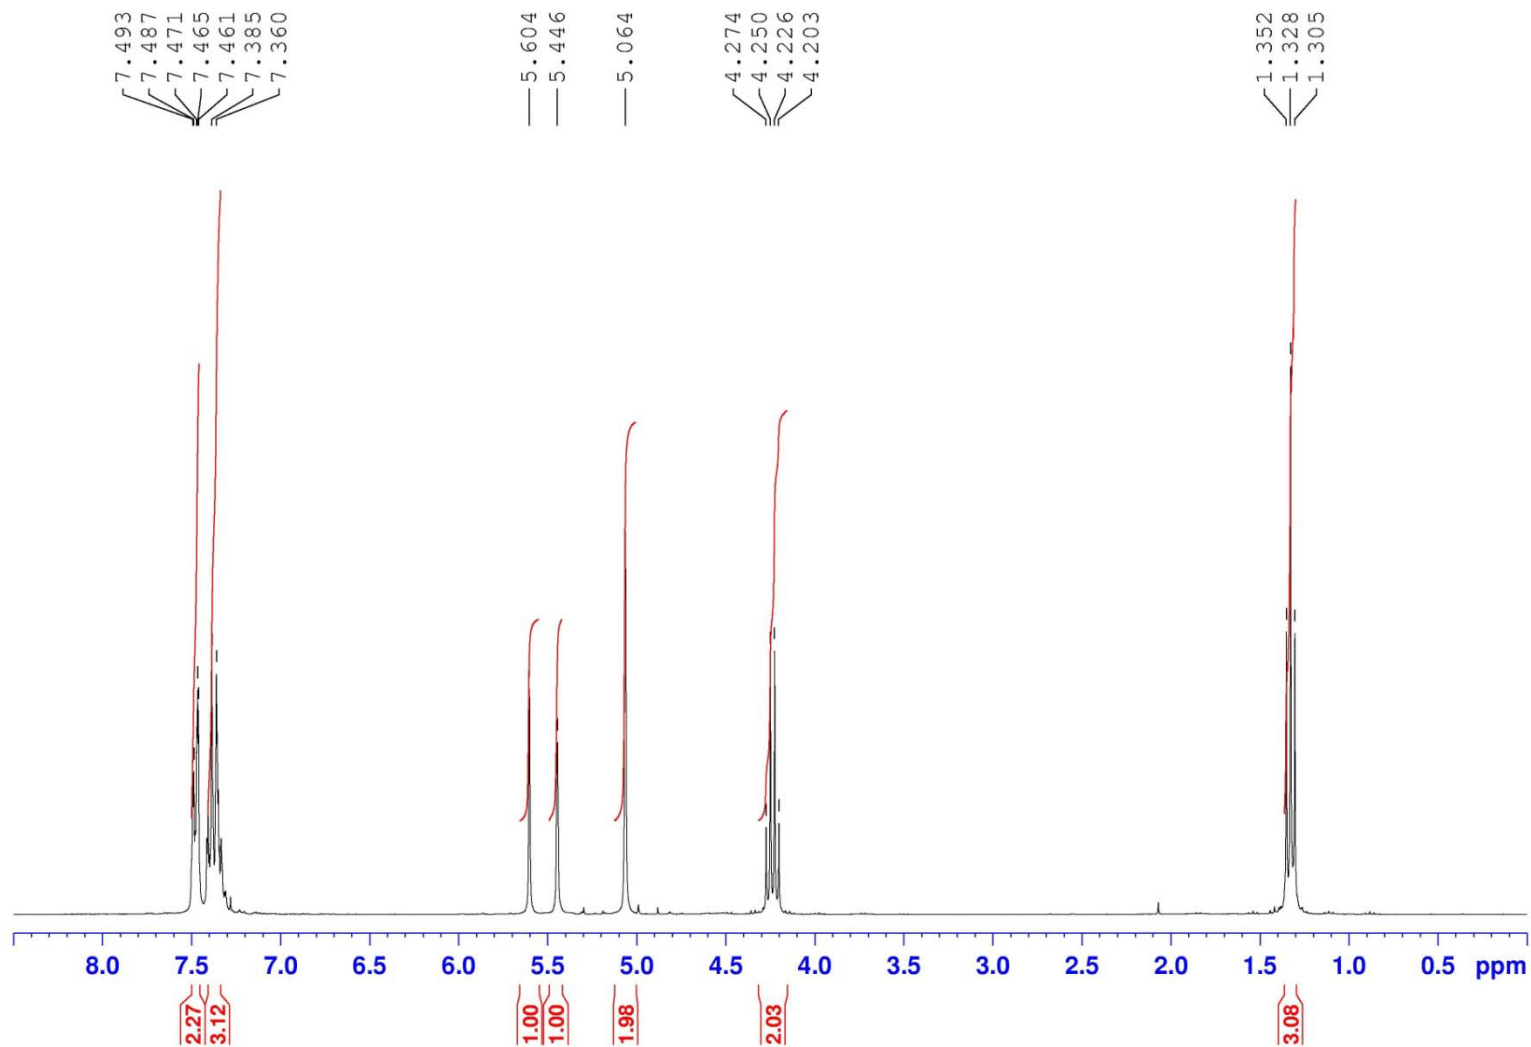

**<sup>13</sup>C NMR of 2-phenylallyl ethyl carbonate**

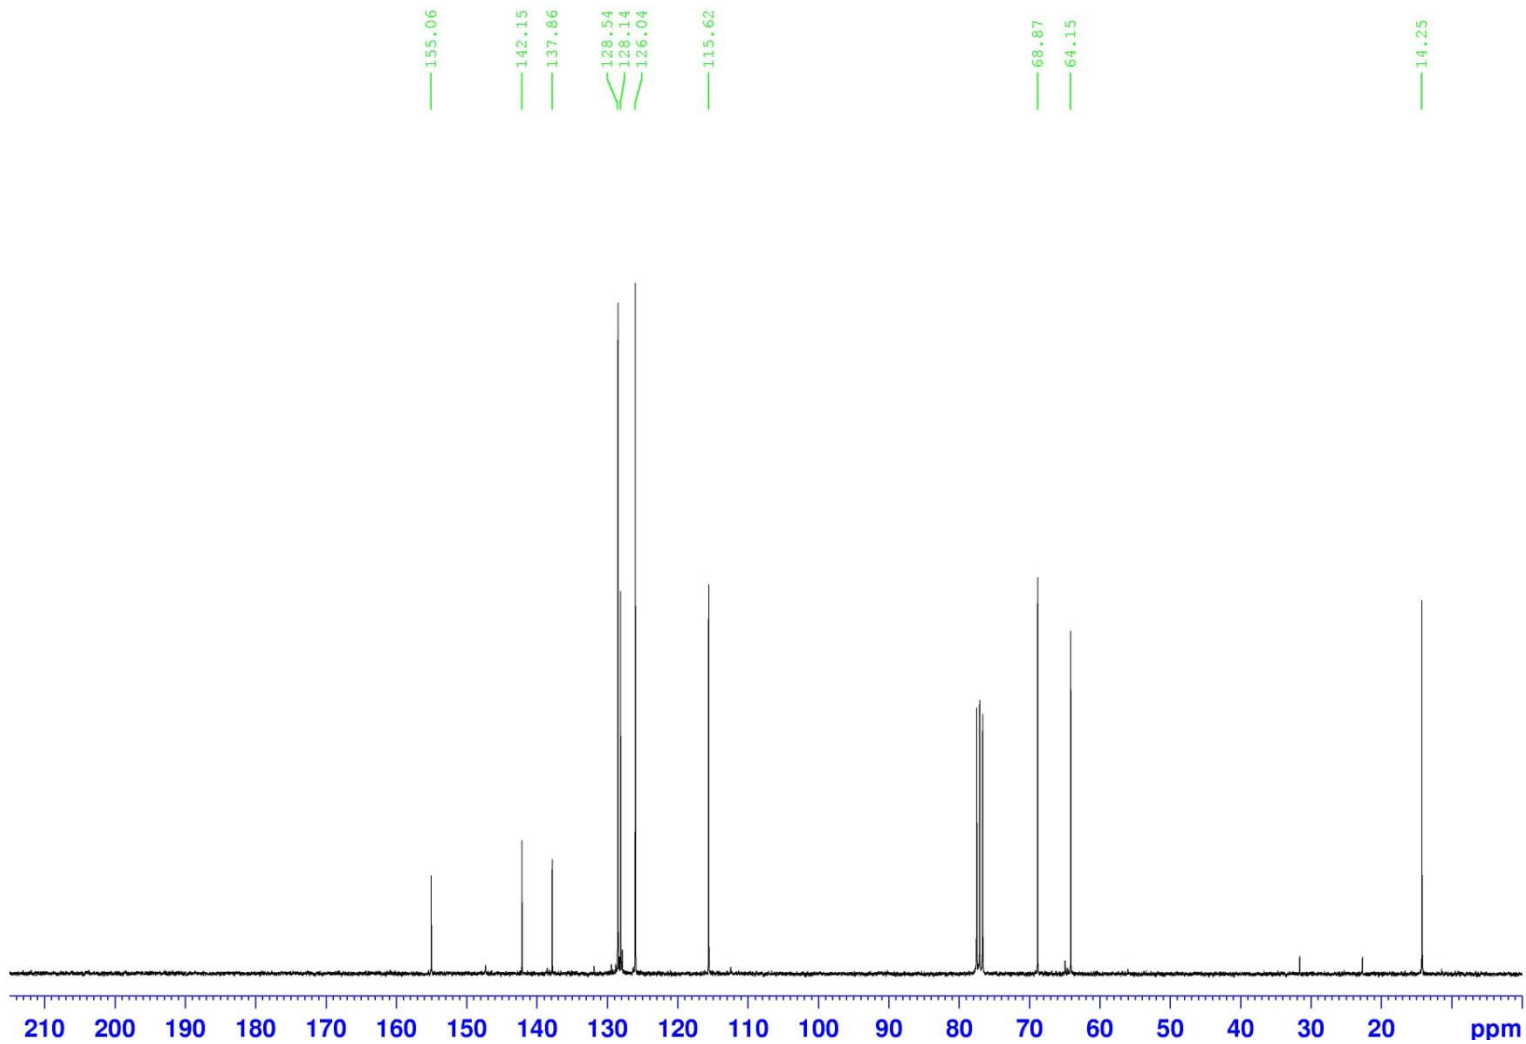

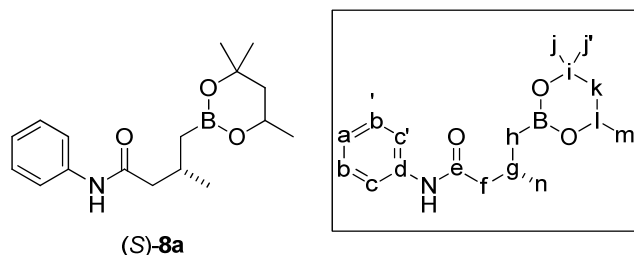

After following the general procedure for the directed CAHB of **7a**, flash chromatography on silica gel (80:20 hexanes:ethyl acetate) affords the title compound (53%) as a light yellow oil.

|                                                      |                                                                                                                                                                                                                                                                                                                                                                                                                     |
|------------------------------------------------------|---------------------------------------------------------------------------------------------------------------------------------------------------------------------------------------------------------------------------------------------------------------------------------------------------------------------------------------------------------------------------------------------------------------------|
| <b>Optical rotation</b>                              | $[\alpha]_{\text{D}}^{20} = -18.8^{\circ}$ ( <i>c</i> 0.5, CHCl <sub>3</sub> )                                                                                                                                                                                                                                                                                                                                      |
| <b>TLC analysis</b>                                  | R <sub>f</sub> 0.7 (60:40 hexanes:ethyl acetate)                                                                                                                                                                                                                                                                                                                                                                    |
| <b><sup>1</sup>H NMR (300 MHz, CDCl<sub>3</sub>)</b> | δ 7.82 (1H, br s, NH), 7.56 (2H, d, <i>J</i> = 7.9 Hz, c,c'), 7.33 (2H, t, <i>J</i> = 7.8 Hz, b,b'), 7.11 (1H, t, <i>J</i> = 7.4 Hz, a), 4.30–4.20 (1H, m, l), 2.40–2.20 (3H, m, g,f), 1.82 (1H, dd, <i>J</i> = 14.0 Hz, 2.9 Hz, k), 1.51 (1H, dd, <i>J</i> = 13.6 Hz, 11.8 Hz, k), 1.33 (6H, s, j,j'), 1.29 (3H, d, <i>J</i> = 6.2 Hz, m), 1.05 (3H, d, <i>J</i> = 6.2 Hz, n), 0.81 (2H, d, <i>J</i> = 5.7 Hz, h). |
| <b><sup>13</sup>C NMR (75 MHz, CDCl<sub>3</sub>)</b> | δ 171.38 (e), 138.33 (d), 128.92 (b,b'), 123.85 (a), 119.62 (c,c'), 71.02 (i), 64.79 (l), 46.97 (k), 45.89 (f), 31.35 (h), 28.38 (j,j'), 28.20 (m), 23.24 (n), 22.85 (g).                                                                                                                                                                                                                                           |
| <b>IR (neat)</b>                                     | 3301 (N-H stretch), 2972, 1660 (C=O stretch), 1600, 1554 (N-H bend), 1499, 1442, 1390, 1302 (C-O stretch), 1209 (C-N stretch), 1161, 755, 692 cm <sup>-1</sup> .                                                                                                                                                                                                                                                    |
| <b>HRMS (EI)</b>                                     | Calcd. for C <sub>17</sub> H <sub>26</sub> BNO <sub>3</sub> : 303.2006, found 303.1996 <i>m/z</i> .                                                                                                                                                                                                                                                                                                                 |

**<sup>1</sup>H NMR of (S)-8a**

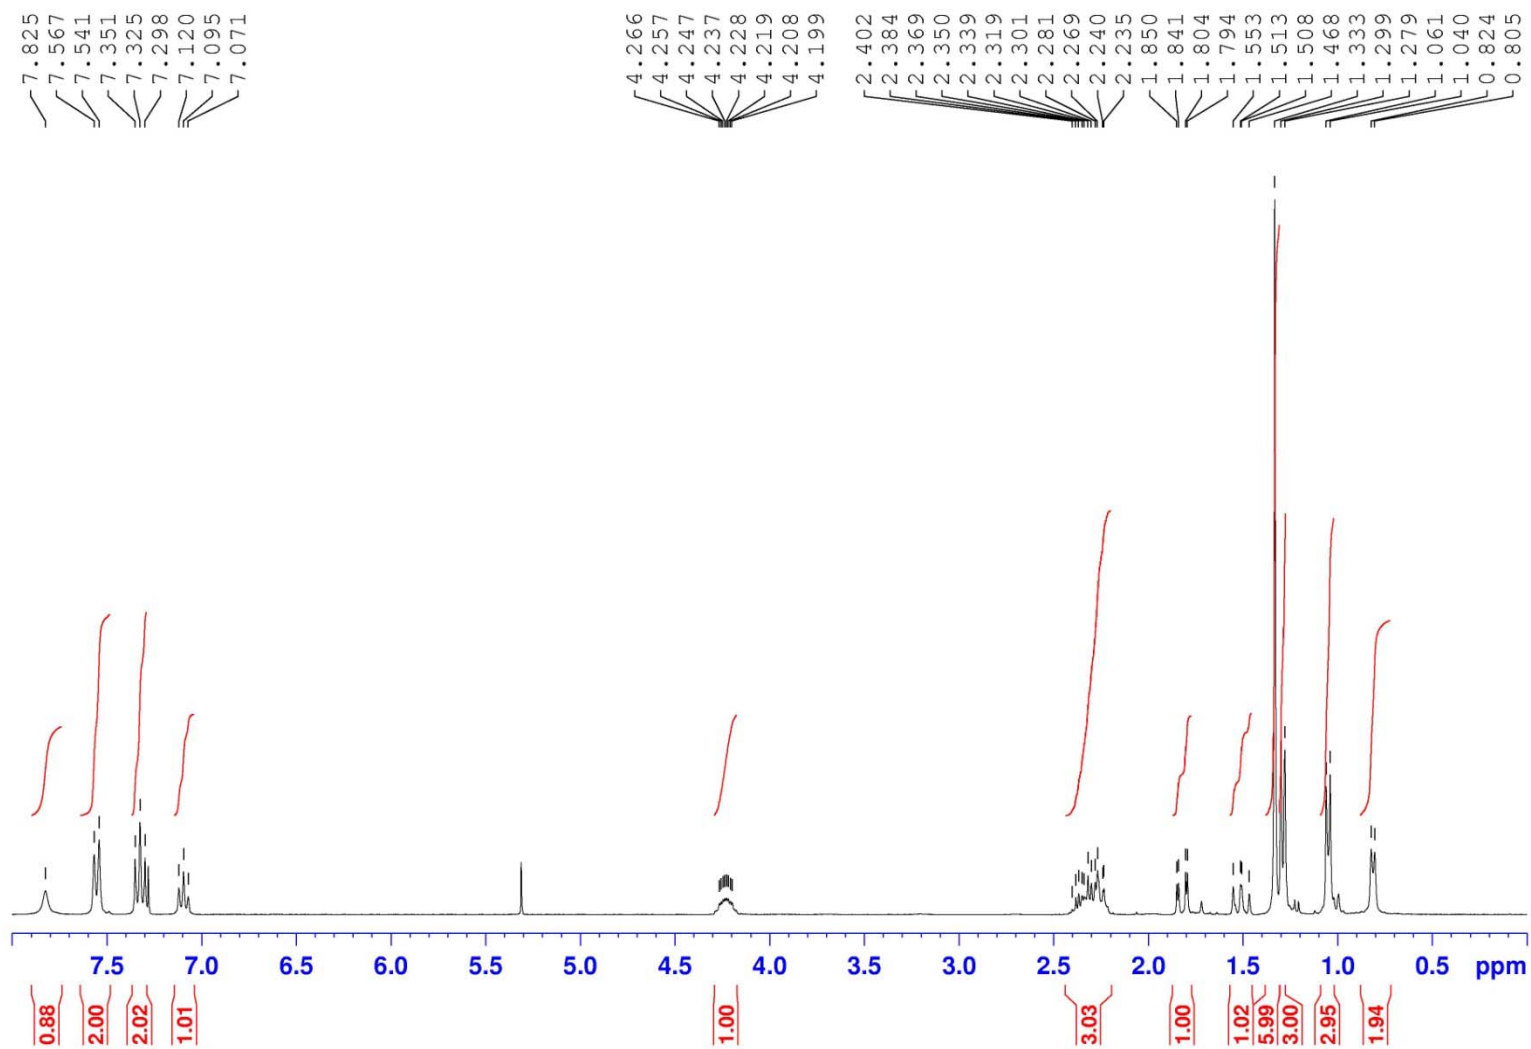

<sup>13</sup>C NMR of XX

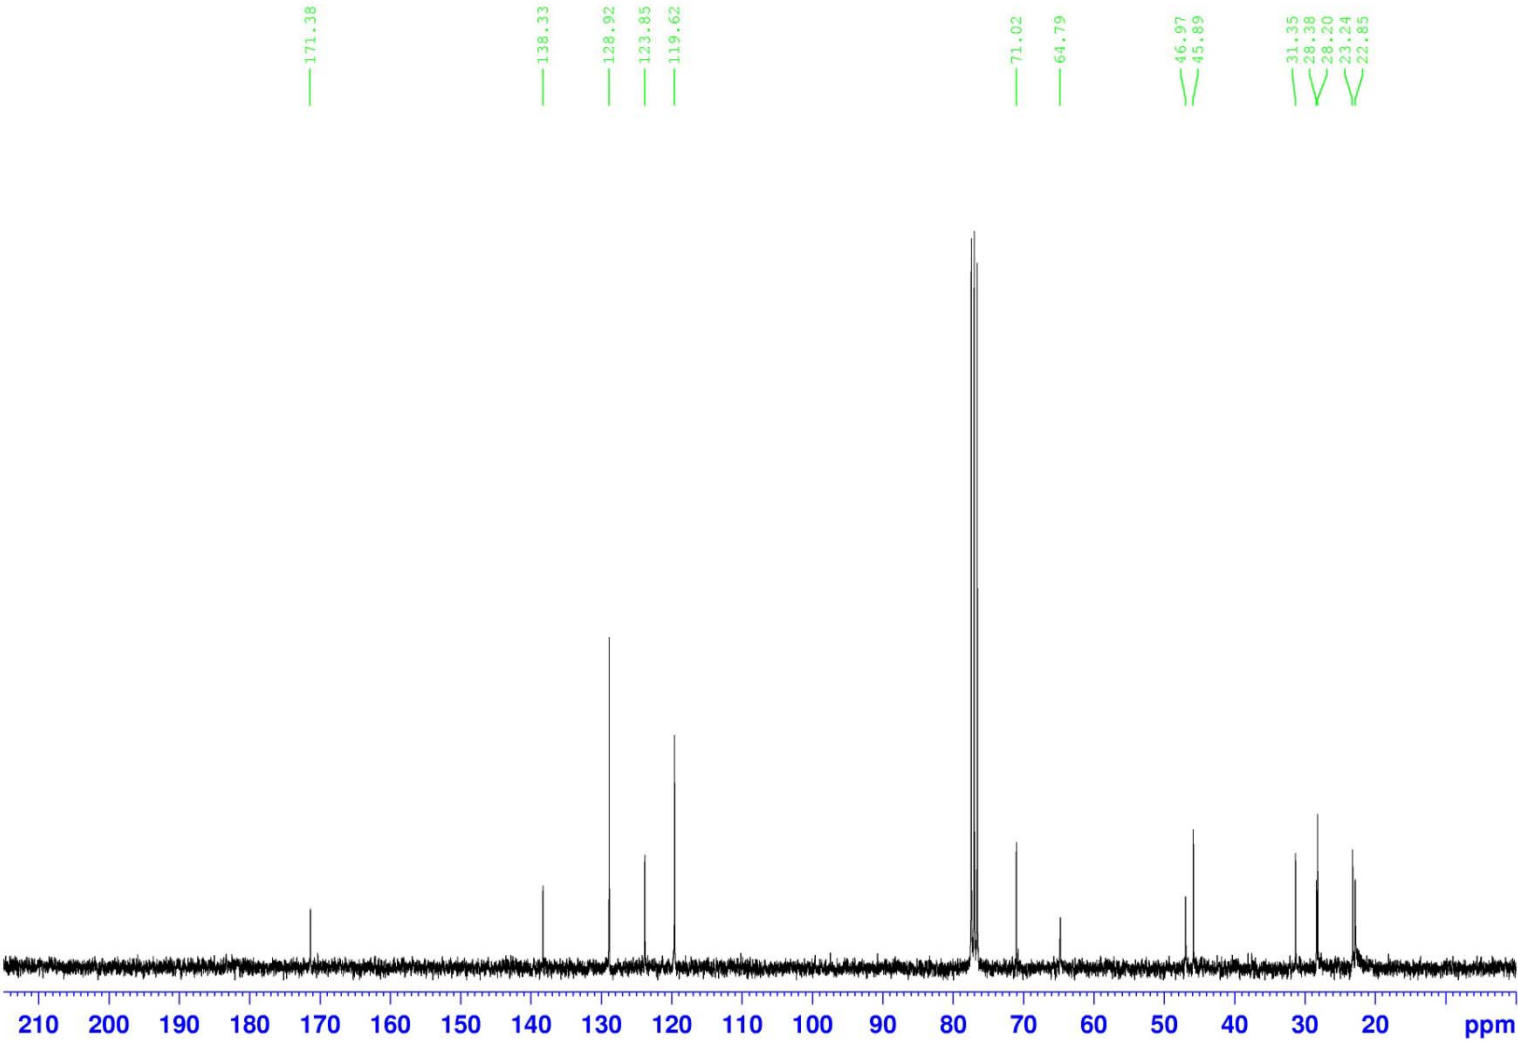

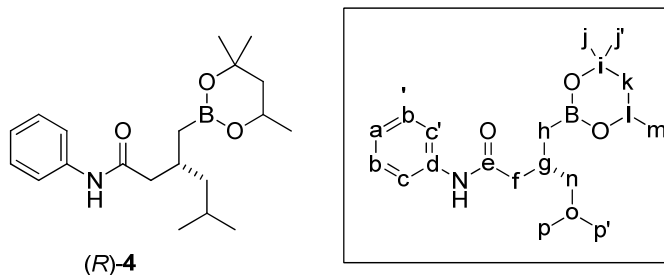

After following the general procedure for the directed CAHB of **3**, flash chromatography on silica gel (80:20 hexanes:ethyl acetate) affords the title compound (72%) as a light yellow oil.

|                                                       |                                                                                                                                                                                                                                                                                                                                                                                                                                                                                                   |
|-------------------------------------------------------|---------------------------------------------------------------------------------------------------------------------------------------------------------------------------------------------------------------------------------------------------------------------------------------------------------------------------------------------------------------------------------------------------------------------------------------------------------------------------------------------------|
| <b>Optical rotation</b>                               | $[\alpha]_D^{20} = -17.9^\circ$ ( <i>c</i> 0.5, CHCl <sub>3</sub> )                                                                                                                                                                                                                                                                                                                                                                                                                               |
| <b>TLC analysis</b>                                   | R <sub>f</sub> 0.7 (60:40 hexanes:ethyl acetate)                                                                                                                                                                                                                                                                                                                                                                                                                                                  |
| <b><sup>1</sup>H NMR (400 MHz, CDCl<sub>3</sub>)</b>  | δ 8.13 (1H, br s, NH), 7.56 (2H, d, <i>J</i> = 8.3 Hz, c,c'), 7.33 (2H, t, <i>J</i> = 7.9 Hz, b,b'), 7.10 (1H, t, <i>J</i> = 7.4 Hz, a), 4.30–4.20 (1H, m, l), 2.40–2.25 (2H, m, f), 2.25–2.15 (1H, m, g), 1.84 (1H, dd, <i>J</i> = 13.9 Hz, 2.9 Hz, k), 1.80–1.70 (1H, m, o), 1.53 (1H, dd, <i>J</i> = 13.7 Hz, 11.8 Hz, k), 1.35 (6H, s, j,j'), 1.31 (3H, dd, <i>J</i> = 6.2 Hz, 2.0 Hz, m), 1.20 (2H, t, <i>J</i> = 6.8 Hz, n), 0.95–0.85 (6H, t, <i>J</i> = 7.1 Hz, p), 0.90–0.70 (2H, m, h). |
| <b><sup>13</sup>C NMR (100 MHz, CDCl<sub>3</sub>)</b> | δ 171.62 (e), 138.45 (d), 128.91 (b,b'), 123.77 (a), 119.61 (c,c'), 71.21 and 71.16 (i), 64.90 (l), 46.75 (n), 45.88 (k), 44.99 (f), 31.40 (h), 30.96 (g), 28.26 and 28.20 (j,j'), 25.14 and 25.11 (o), 23.30 and 23.28 (m), 23.08, 23.06, and 23.34 (p,p').                                                                                                                                                                                                                                      |
| <b>IR (neat)</b>                                      | 3304 (N-H stretch), 2954, 1659 (C=O stretch), 1600, 1544 (N-H bend), 1499, 1442, 1389, 1302 (C-O stretch), 1208 (C-N stretch), 1161, 755 cm <sup>-1</sup> .                                                                                                                                                                                                                                                                                                                                       |
| <b>HRMS (EI)</b>                                      | Calcd. for C <sub>20</sub> H <sub>32</sub> BNO <sub>3</sub> : 345.2475, found 345.2486 <i>m/z</i> .                                                                                                                                                                                                                                                                                                                                                                                               |

**<sup>1</sup>H NMR of (R)-4**

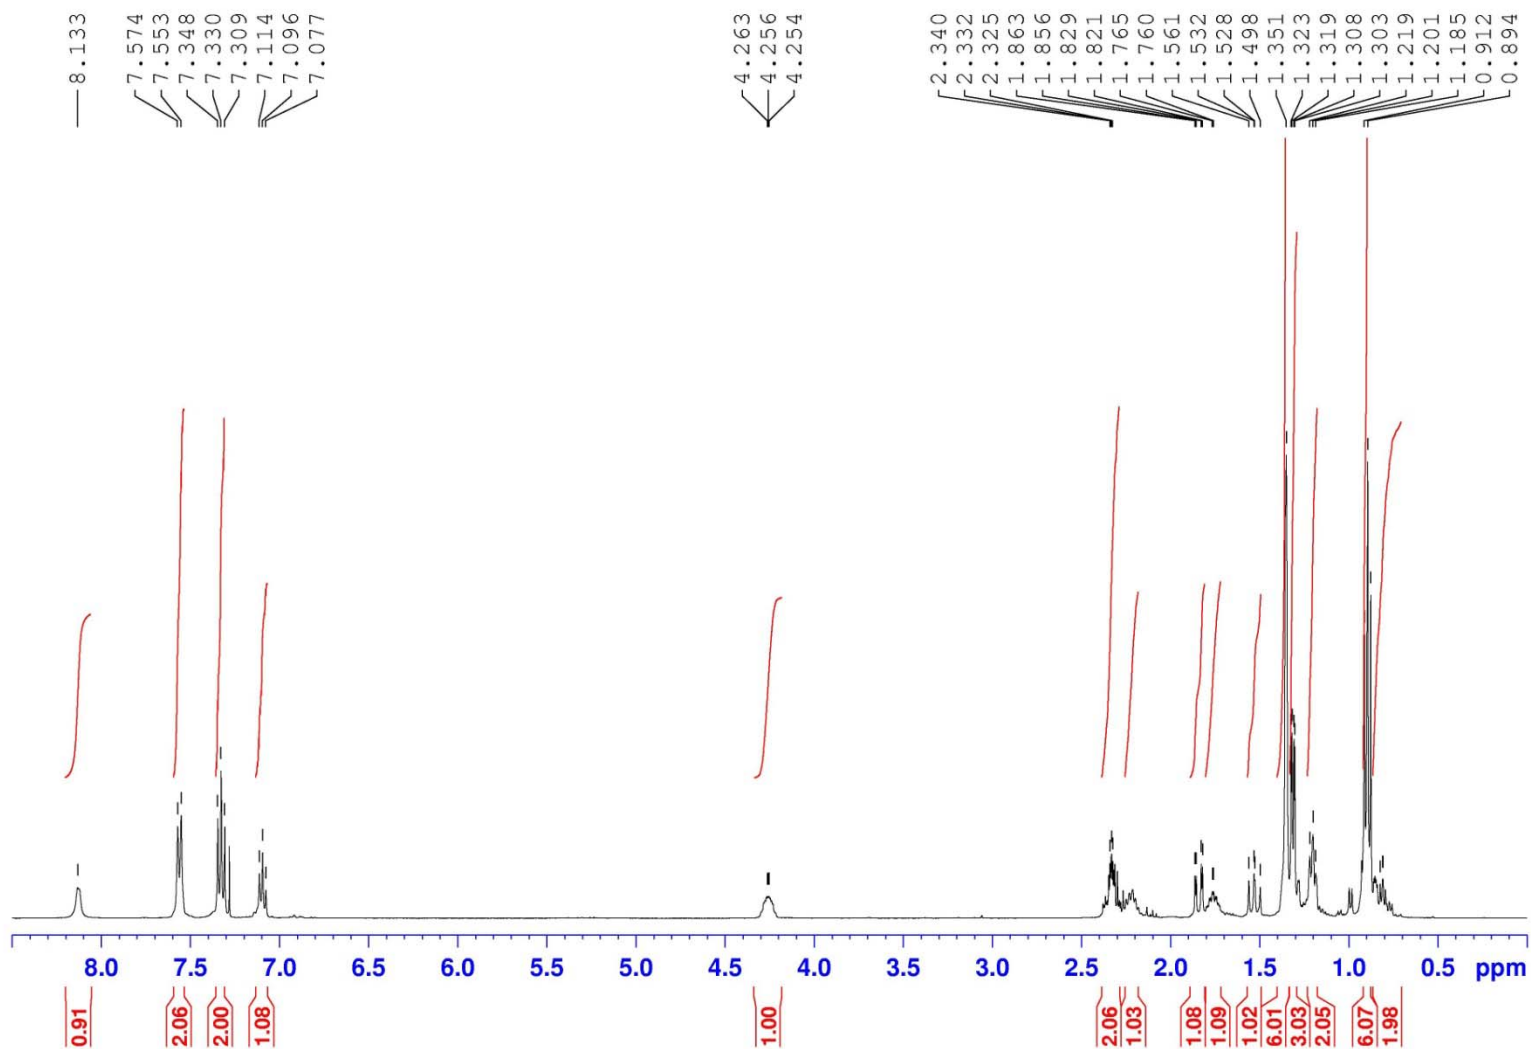

**$^{13}\text{C}$  NMR of (*R*)-4**

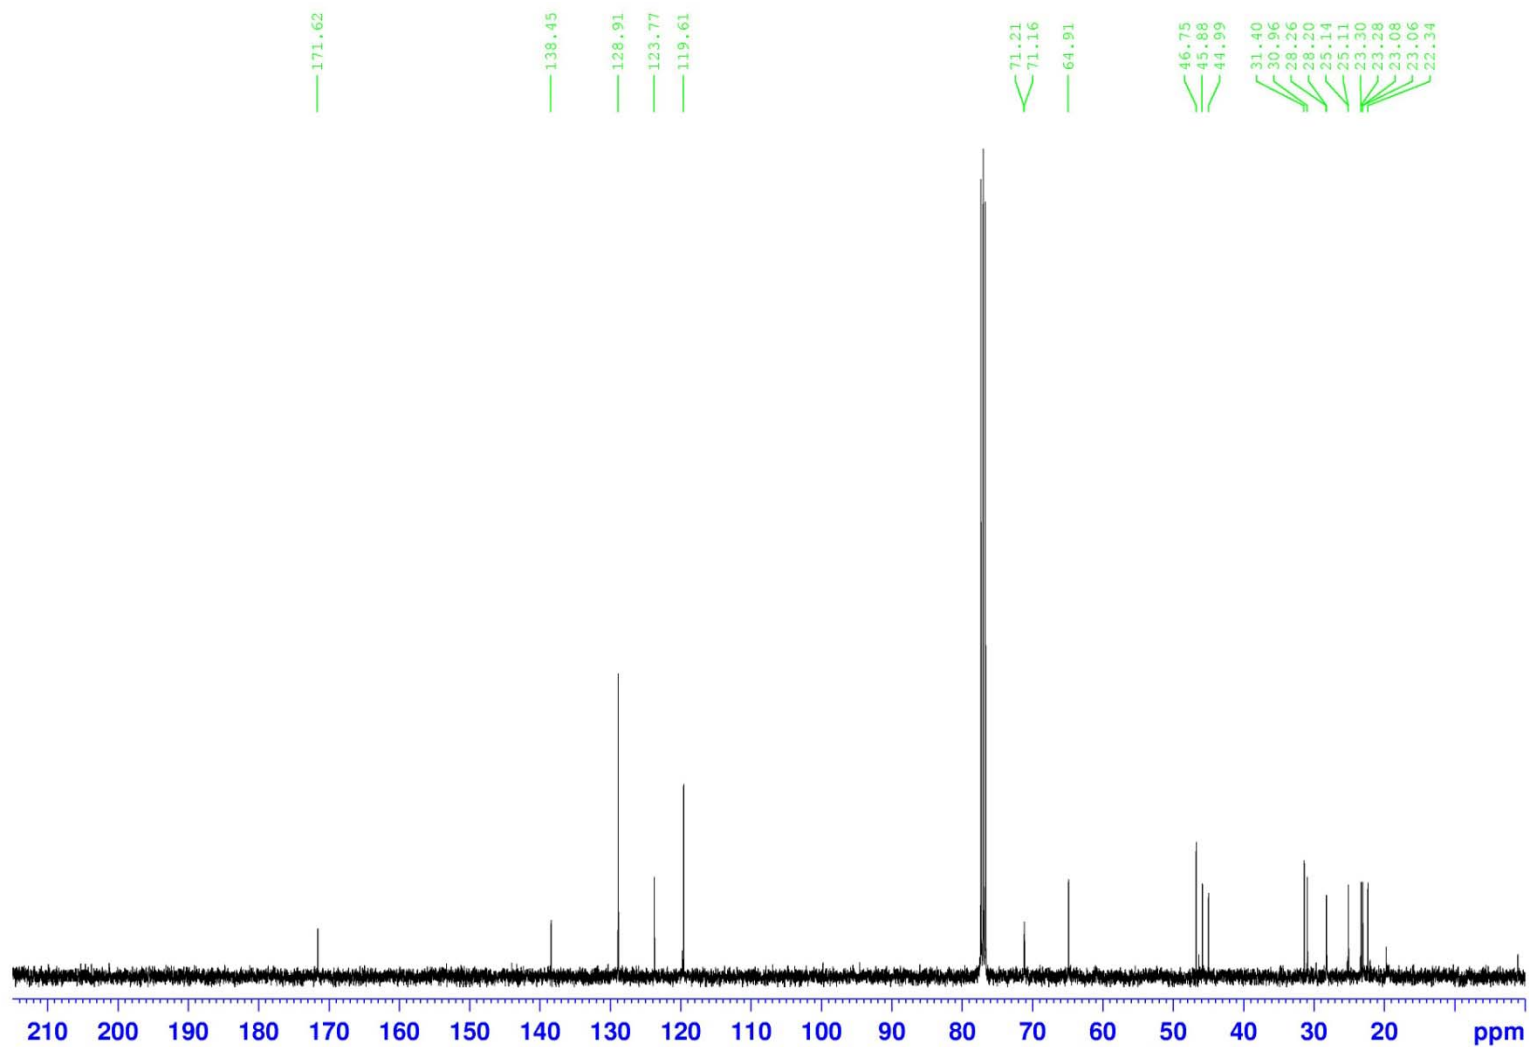



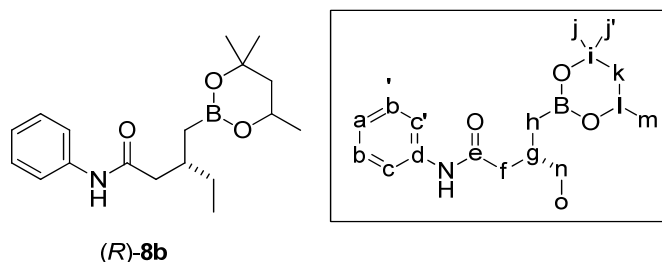

After following the general procedure for the directed CAHB of **7b**, flash chromatography on silica gel (80:20 hexanes:ethyl acetate) affords the title compound (60%) as a light yellow oil.

|                                                       |                                                                                                                                                                                                                                                                                                                                                                                                                                                                                |
|-------------------------------------------------------|--------------------------------------------------------------------------------------------------------------------------------------------------------------------------------------------------------------------------------------------------------------------------------------------------------------------------------------------------------------------------------------------------------------------------------------------------------------------------------|
| <b>Optical rotation</b>                               | $[\alpha]_{\text{D}}^{20} = -22.4^{\circ}$ ( <i>c</i> 0.5, CHCl <sub>3</sub> )                                                                                                                                                                                                                                                                                                                                                                                                 |
| <b>TLC analysis</b>                                   | $R_f$ 0.7 (60:40 hexanes:ethyl acetate)                                                                                                                                                                                                                                                                                                                                                                                                                                        |
| <b><sup>1</sup>H NMR (400 MHz, CDCl<sub>3</sub>)</b>  | δ 8.04 (1H, br s, NH), 7.56 (2H, d, <i>J</i> = 8.0 Hz, c,c'), 7.33 (2H, t, <i>J</i> = 7.9 Hz, b,b'), 7.10 (1H, t, <i>J</i> = 7.4 Hz, a), 4.30–4.20 (1H, m, l), 2.40–2.30 (2H, m, f), 2.15–2.00 (1H, m, g), 1.83 (1H, dd, <i>J</i> = 14.0 Hz, 2.9 Hz, k), 1.52 (1H, dd, <i>J</i> = 13.8 Hz, 11.9 Hz, k), 1.50–1.35 (2H, m, n), 1.35 (6H, s, j,j'), 1.30 (3H, dd, <i>J</i> = 6.2 Hz, 1.5 Hz, m), 0.95 (3H, t, <i>J</i> = 7.4 Hz, o), 0.95–0.85 (1H, m, h), 0.85–0.75 (1H, m, h). |
| <b><sup>13</sup>C NMR (100 MHz, CDCl<sub>3</sub>)</b> | δ 171.73 (e), 138.46 (d), 128.89 (b,b'), 123.77 (a), 119.63 (c,c'), 71.13 and 71.09 (i), 64.86 (l), 45.84 (k), 44.34 (f), 34.88 (g), 31.37 (h), 29.92 (n), 28.22 and 28.18 (j,j'), 23.26 (m), 11.66 (o).                                                                                                                                                                                                                                                                       |
| <b>IR (neat)</b>                                      | 3296 (N-H stretch), 2971, 2926, 1660 (C=O stretch), 1600, 1543 (N-H bend), 1499, 1441, 1389, 1302 (C-O stretch), 1209 (C-N stretch), 755 cm <sup>-1</sup> .                                                                                                                                                                                                                                                                                                                    |
| <b>HRMS (EI)</b>                                      | Calcd. for C <sub>18</sub> H <sub>28</sub> BNO <sub>3</sub> : 317.2162, found 317.2172 <i>m/z</i> .                                                                                                                                                                                                                                                                                                                                                                            |

**<sup>1</sup>H NMR of (*R*)-8b**

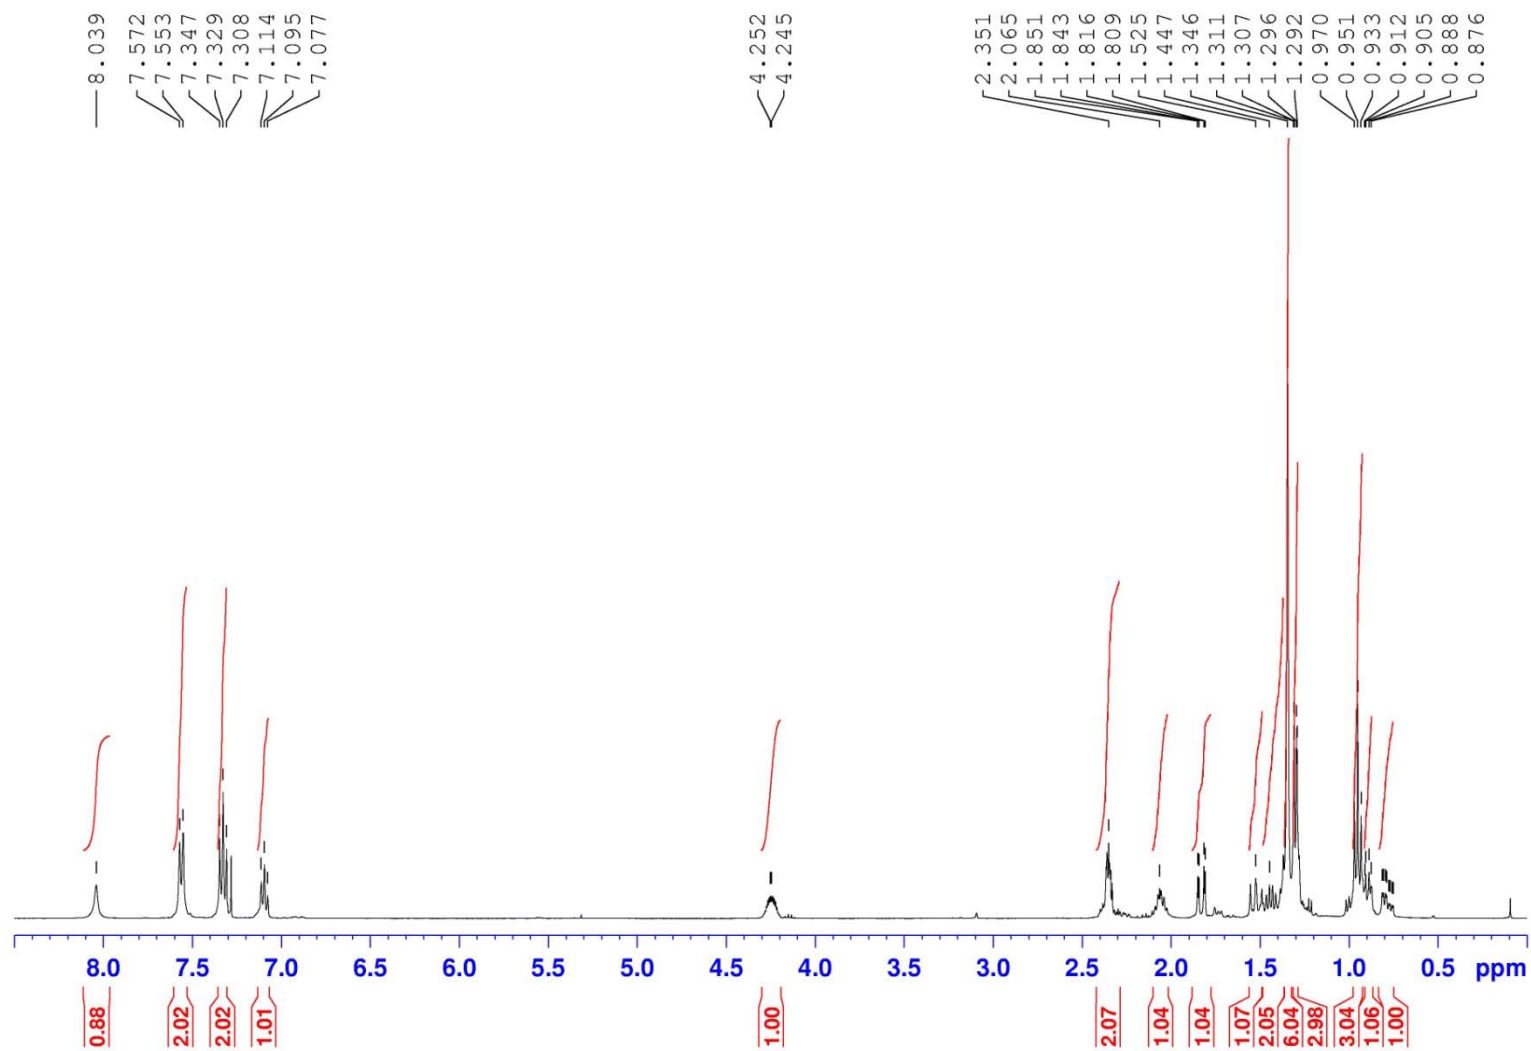

**<sup>13</sup>C NMR of (*R*)-8b**

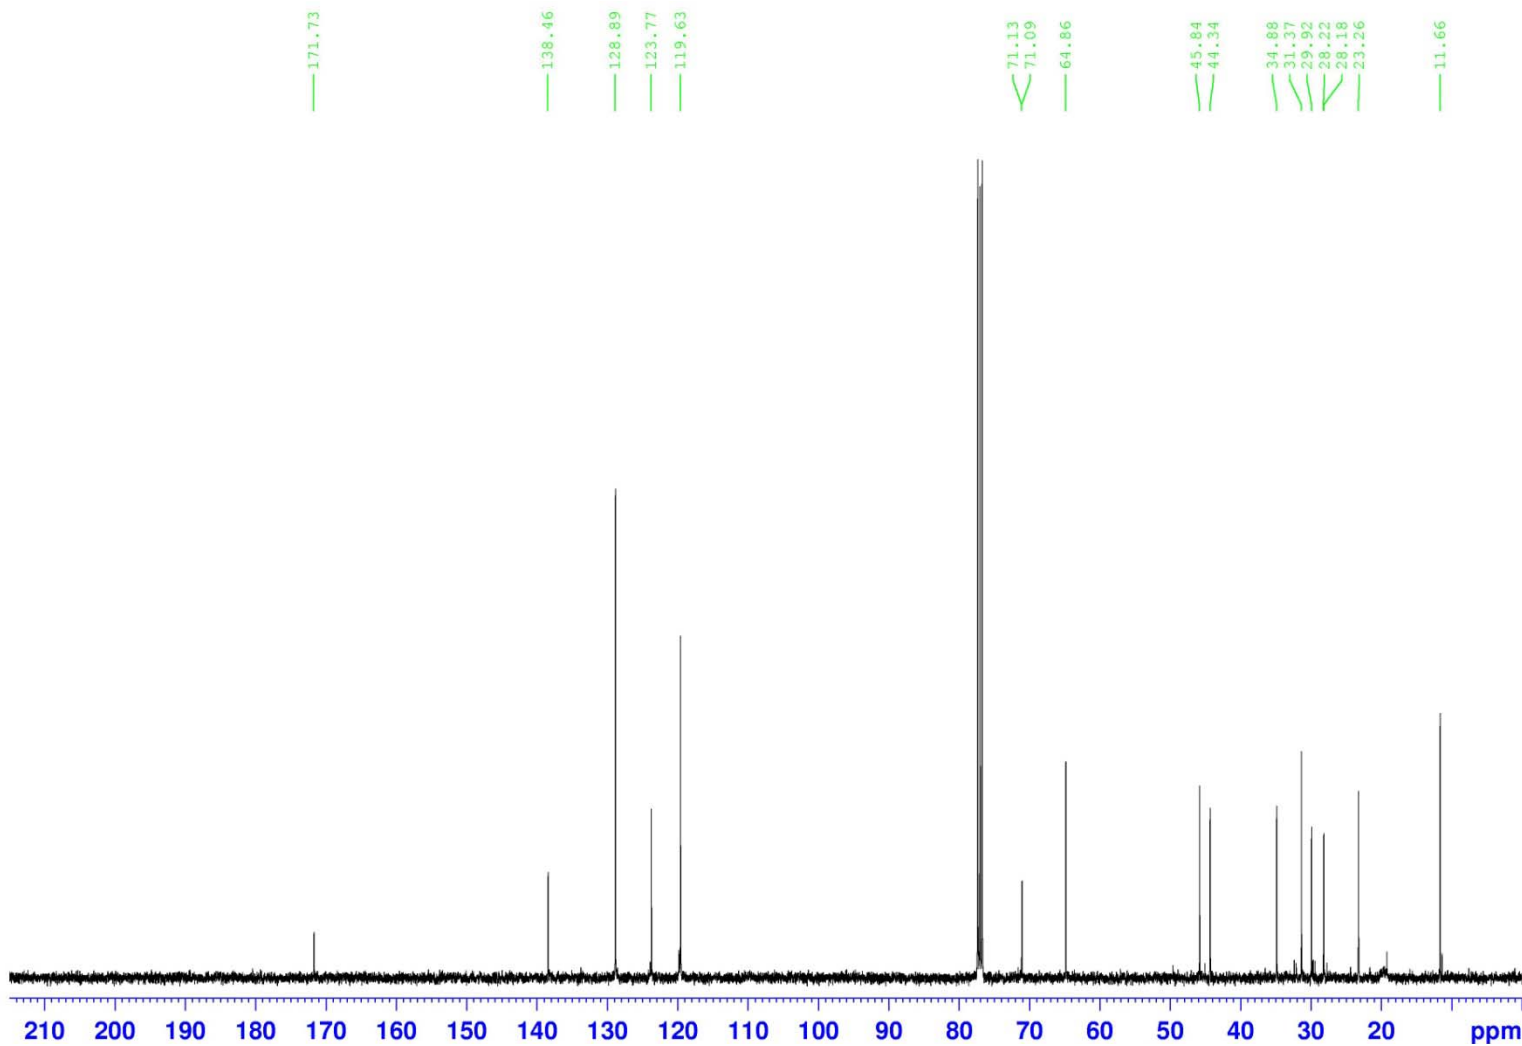

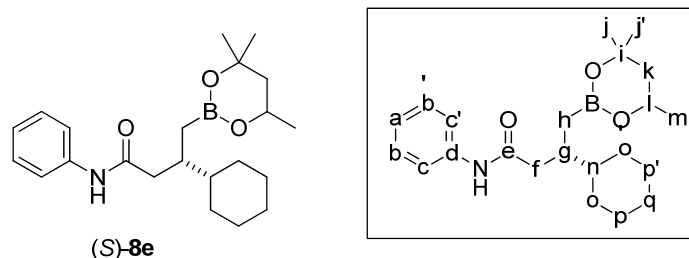

After following the general procedure for the directed CAHB of **7e**, flash chromatography on silica gel (80:20 hexanes:ethyl acetate) affords the title compound (72%) as a light yellow oil.

|                                                       |                                                                                                                                                                                                                                                                                                                                                                                                                                                                                 |
|-------------------------------------------------------|---------------------------------------------------------------------------------------------------------------------------------------------------------------------------------------------------------------------------------------------------------------------------------------------------------------------------------------------------------------------------------------------------------------------------------------------------------------------------------|
| <b>Optical rotation</b>                               | $[\alpha]_{\text{D}}^{20} = -16.4^{\circ}$ ( <i>c</i> 0.5, CHCl <sub>3</sub> )                                                                                                                                                                                                                                                                                                                                                                                                  |
| <b>TLC analysis</b>                                   | R <sub>f</sub> 0.7 (60:40 hexanes:ethyl acetate)                                                                                                                                                                                                                                                                                                                                                                                                                                |
| <b><sup>1</sup>H NMR (400 MHz, CDCl<sub>3</sub>)</b>  | δ 8.03 (1H, br s, NH), 7.56 (2H, d, <i>J</i> = 7.9 Hz, c,c'), 7.32 (2H, t, <i>J</i> = 7.9 Hz, b,b'), 7.09 (1H, t, <i>J</i> = 7.4 Hz, a), 4.30–4.15 (1H, m, l), 2.50–2.30 (2H, m, f), 2.10–2.00 (1H, m, g), 1.80 (1H, dd, <i>J</i> = 14.1 Hz, 2.6 Hz, k), 1.80–1.65 (5H, m, n,p,p'), 1.51 (1H, t, <i>J</i> = 12.8 Hz, k), 1.32 (6H, s, j,j'), 1.28 (3H, d, <i>J</i> = 6.0 Hz, m), 1.25–0.95 (6H, m, o,o',q), 0.87 (1H, dd, <i>J</i> = 15.3 Hz, 5.2 Hz, h), 0.80–0.70 (1H, m, h). |
| <b><sup>13</sup>C NMR (100 MHz, CDCl<sub>3</sub>)</b> | δ 172.35 (e), 138.48 (d), 128.90 (b,b'), 123.76 (a), 119.64 (c,c'), 71.09 and 71.00 (i), 64.86 and 64.80 (l), 45.78 (k), 43.29 and 43.26 (n), 42.25 and 42.21 (f), 38.48 (g), 31.36 (h), 30.49 (o,o'), 29.81, 29.70, 28.16, and 28.08 (j,j'), 26.73 (p,p'), 26.68 (q), 23.25 (m).                                                                                                                                                                                               |
| <b>IR (neat)</b>                                      | 3298 (N-H stretch), 3255, 2928, 1656 (C=O stretch), 1595 (N-H bend), 1414, 1318 (C-O stretch), 1246, 1206 (C-N stretch), 1141, 755 cm <sup>-1</sup> .                                                                                                                                                                                                                                                                                                                           |
| <b>HRMS (EI)</b>                                      | Calcd. for C <sub>22</sub> H <sub>34</sub> BNO <sub>3</sub> : 371.2632, found 371.2627 <i>m/z</i> .                                                                                                                                                                                                                                                                                                                                                                             |

**<sup>1</sup>H NMR of (S)-8e**

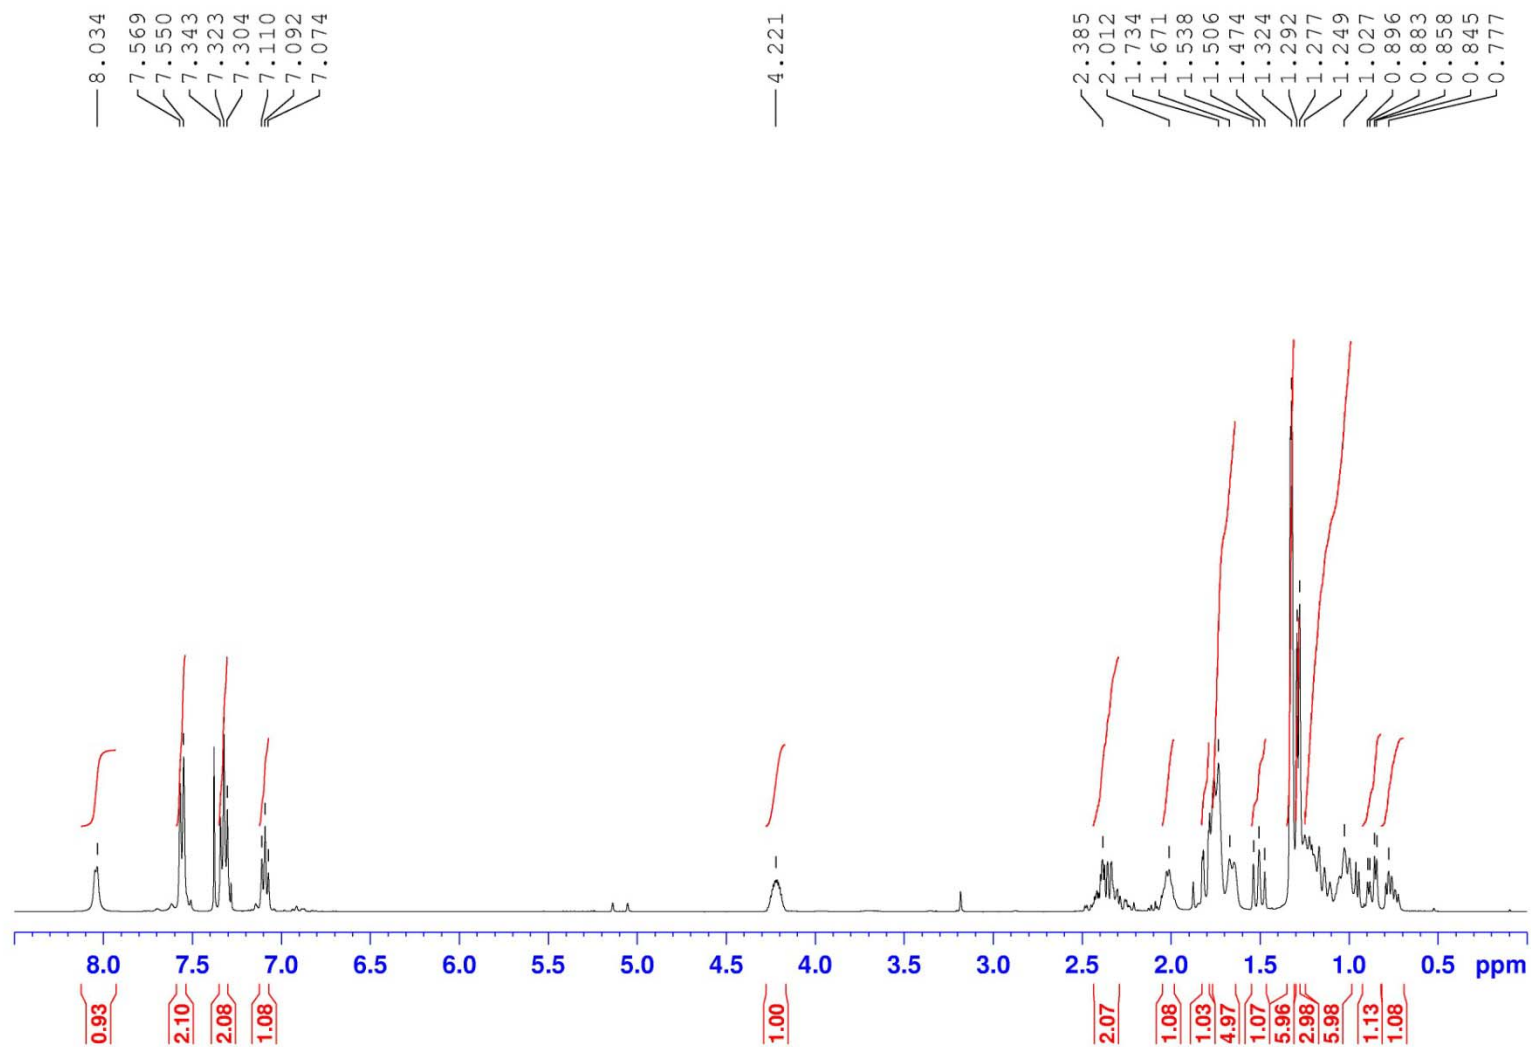

**$^{13}\text{C}$  NMR of (*S*)-8e**

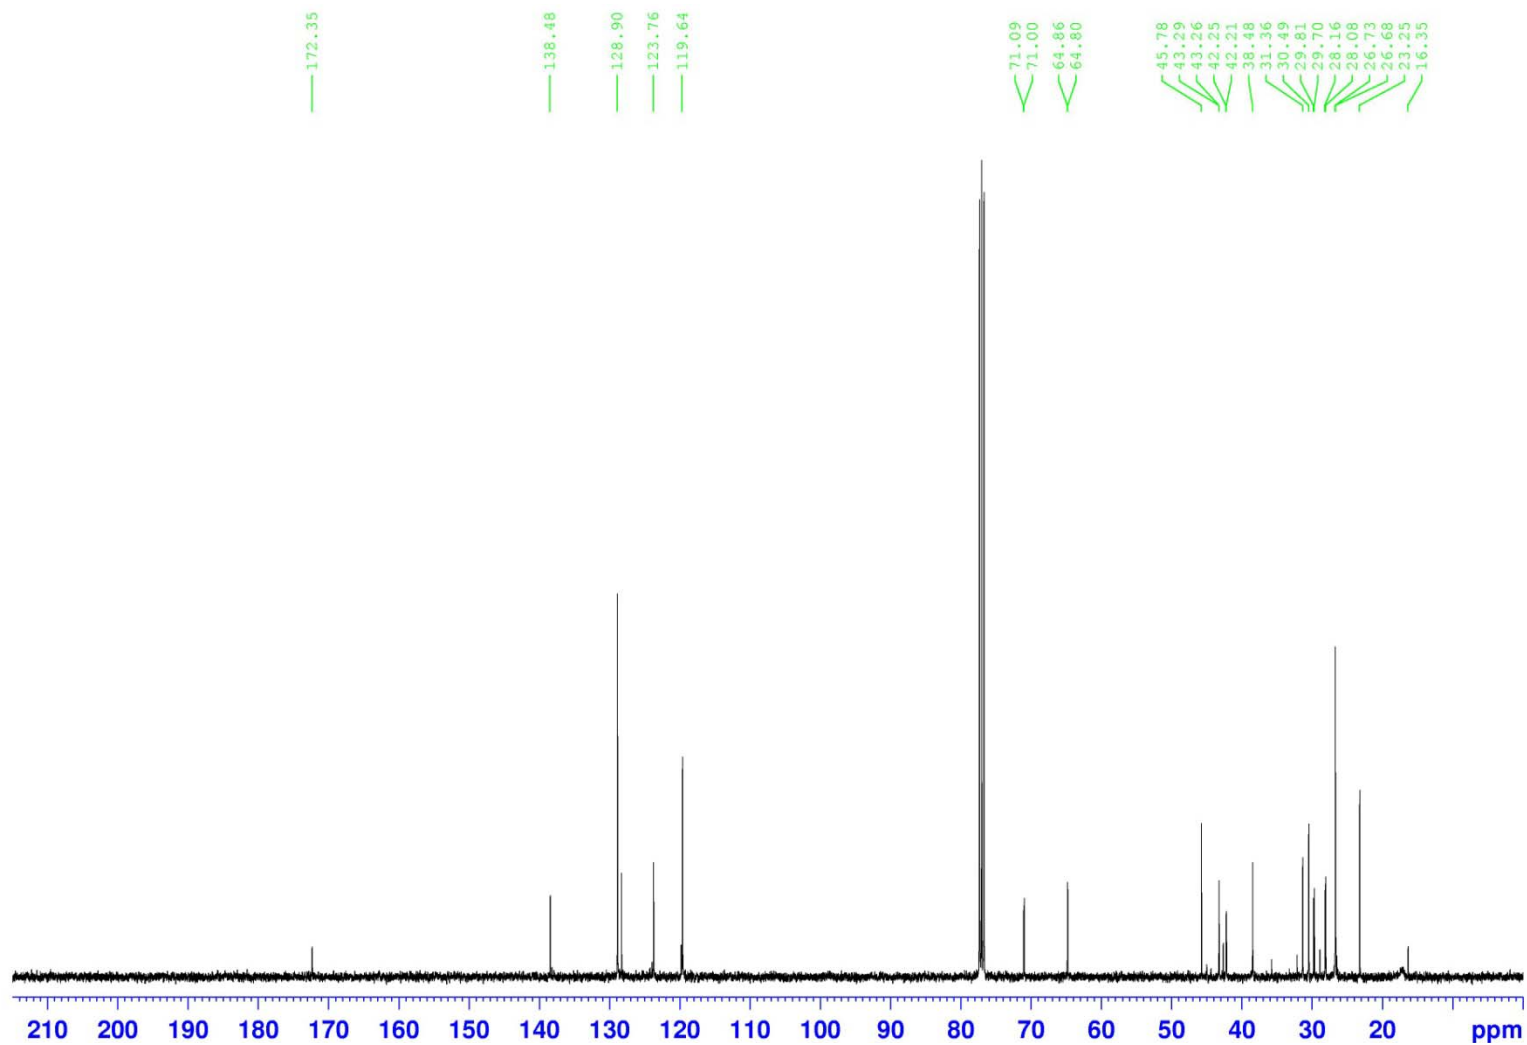

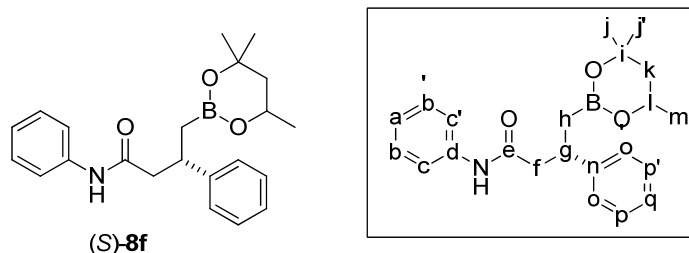

After following the general procedure for the directed CAHB of **7f**, flash chromatography on silica gel (80:20 hexanes:ethyl acetate) affords the title compound (71%) as a light yellow oil.

|                                                       |                                                                                                                                                                                                                                                                                                                                                         |
|-------------------------------------------------------|---------------------------------------------------------------------------------------------------------------------------------------------------------------------------------------------------------------------------------------------------------------------------------------------------------------------------------------------------------|
| <b>Optical rotation</b>                               | $[\alpha]_{\text{D}}^{20} = -18.8^{\circ}$ ( <i>c</i> 0.5, CHCl <sub>3</sub> )                                                                                                                                                                                                                                                                          |
| <b>TLC analysis</b>                                   | R <sub>f</sub> 0.7 (60:40 hexanes:ethyl acetate)                                                                                                                                                                                                                                                                                                        |
| <b><sup>1</sup>H NMR (400 MHz, CDCl<sub>3</sub>)</b>  | δ 7.36 (2H, d, <i>J</i> = 7.8 Hz, c,c'), 7.35–7.25 (6H, m, b,b',o,o',p,p'), 7.25–7.15 (1H, m, q), 7.07 (1H, t, <i>J</i> = 7.2 Hz, a), 4.15–4.00 (1H, m, l), 3.50–3.40 (1H, m, g), 2.80–2.70 (1H, m, f), 2.62 (1H, dd, <i>J</i> = 13.6 Hz, 2.8 Hz, f), 1.69 (1H, dd, <i>J</i> = 13.9 Hz, 2.8 Hz, k), 1.35–1.25 (1H, m, k), 1.25–1.05 (11H, m, h,j,j',m). |
| <b><sup>13</sup>C NMR (100 MHz, CDCl<sub>3</sub>)</b> | δ 170.56 (e), 146.23 (n), 137.95 (d), 128.84 (b,b'), 128.41 (p,p'), 127.32 and 127.30 (o,o'), 126.29 (q), 123.99 (a), 119.80 (c,c'), 70.80 (i), 64.71 and 64.68 (l), 47.15 and 47.11 (f), 45.70 (k), 39.05 (g), 31.15 and 31.11 (h), 27.97 and 27.90 (j,j'), 23.08 and 23.07 (m).                                                                       |
| <b>IR (neat)</b>                                      | 3299 (N-H stretch), 2973, 1657 (C=O stretching), 1600, 1544 (N-H bend), 1499, 1442, 1392, 1302 (C-O stretch), 1208 (C-N stretch), 1187, 909, 755, 731 cm <sup>-1</sup> .                                                                                                                                                                                |
| <b>HRMS (EI)</b>                                      | Calcd. for C <sub>22</sub> H <sub>28</sub> BNO <sub>3</sub> : 365.2162, found 365.2169 <i>m/z</i> .                                                                                                                                                                                                                                                     |

**<sup>1</sup>H NMR of (S)-8f**

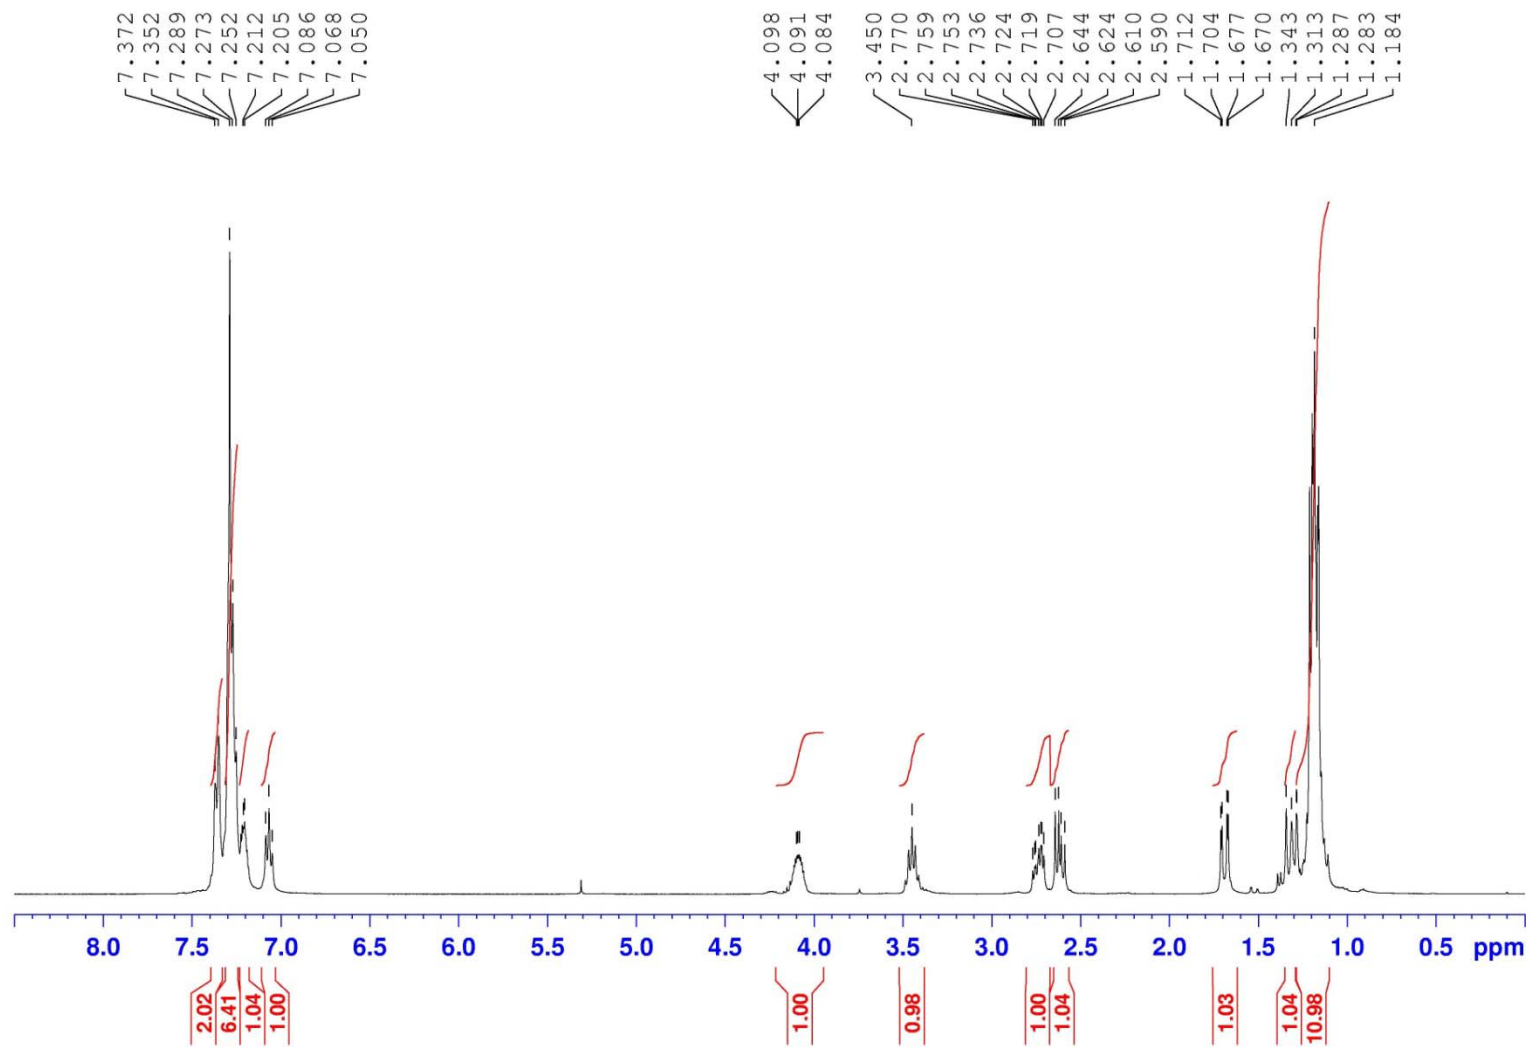



**$^{13}\text{C}$  NMR of (*S*)-8f**

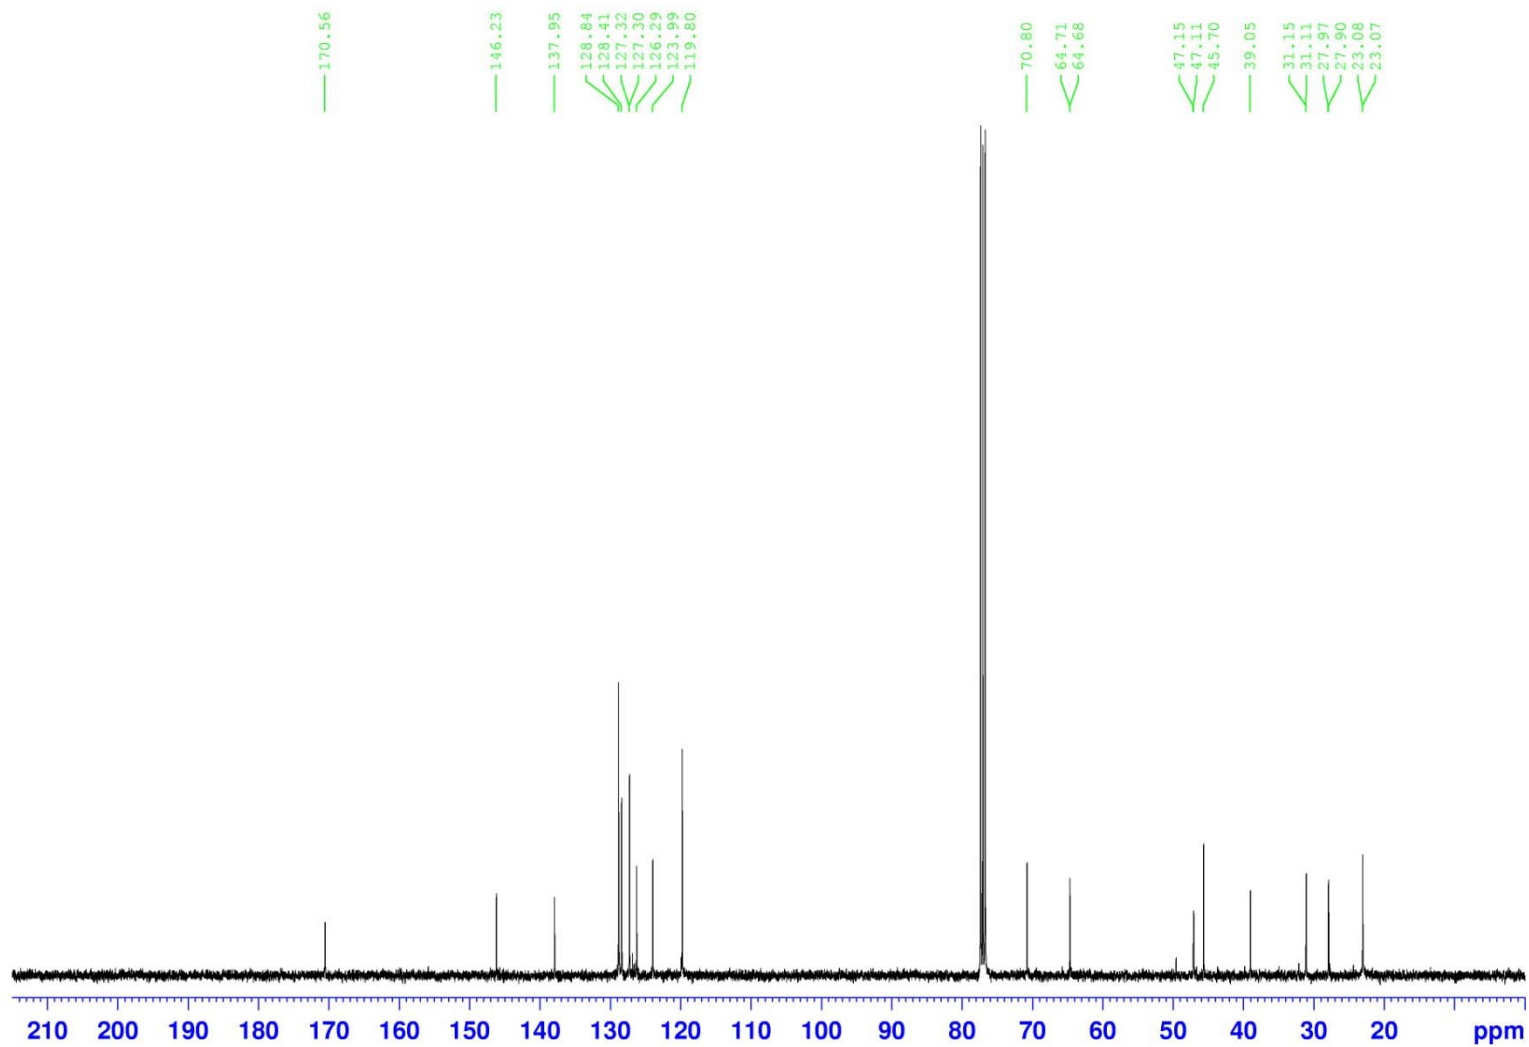

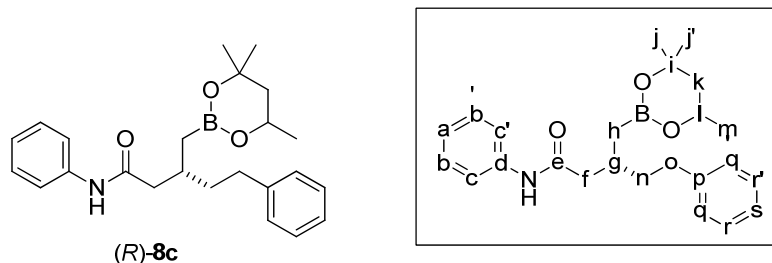

After following the general procedure for the directed CAHB of **7c**, flash chromatography on silica gel (80:20 hexanes:ethyl acetate) affords the title compound (73%) as a light yellow oil.

|                                                      |                                                                                                                                                                                                                                                                                                                                                                                                        |
|------------------------------------------------------|--------------------------------------------------------------------------------------------------------------------------------------------------------------------------------------------------------------------------------------------------------------------------------------------------------------------------------------------------------------------------------------------------------|
| <b>Optical rotation</b>                              | $[\alpha]_{\text{D}}^{20} = -12.6^{\circ}$ (c 0.5, CHCl <sub>3</sub> )                                                                                                                                                                                                                                                                                                                                 |
| <b>TLC analysis</b>                                  | R <sub>f</sub> 0.7 (60:40 hexanes:ethyl acetate)                                                                                                                                                                                                                                                                                                                                                       |
| <b><sup>1</sup>H NMR (300 MHz, CDCl<sub>3</sub>)</b> | δ 8.05 (1H, br s, NH), 7.56 (2H, d, <i>J</i> = 8.0 Hz, c,c'), 7.40–7.15 (7H, m, b,b',o,o',p,p',q), 7.11 (1H, t, <i>J</i> = 7.3 Hz, a), 4.35–4.15 (1H, m, l), 2.85–2.60 (2H, m, o), 2.45–2.35 (2H, m, f), 2.30–2.15 (1H, m, g), 1.85 (1H, dd, <i>J</i> = 14.0 Hz, 2.8 Hz, k), 1.80–1.60 (2H, m, n), 1.60–1.45 (1H, m, k), 1.36 (6H, s, j,j'), 1.32 (3H, d, <i>J</i> = 6.2 Hz, m), 1.00–0.90 (2H, m, h). |
| <b><sup>13</sup>C NMR (75 MHz, CDCl<sub>3</sub>)</b> | δ 171.35 (e), 142.74 (p), 138.36 (d), 128.93 (b,b'), 128.43 (r,r'), 128.29 (q,q'), 125.62 (s), 123.87 (a), 119.66 (c,c'), 71.28 and 71.24 (i), 64.95 (l), 45.86 (k), 44.63 (f), 39.24 (n), 33.59 (o), 33.09 (g), 31.40 (h), 28.29 and 28.24 (j,j'), 23.29 and 23.27 (m).                                                                                                                               |
| <b>IR (neat)</b>                                     | 3305 (N-H stretch), 2972, 2929, 1659 (C=O stretch), 1600, 1541 (N-H bend), 1498, 1442, 1390, 1303 (C-O stretch), 1209 (C-N stretch), 906, 754 cm <sup>-1</sup> .                                                                                                                                                                                                                                       |
| <b>HRMS (ESI)</b>                                    | Calcd. for C <sub>24</sub> H <sub>32</sub> BNaNO <sub>3</sub> (M+Na): 416.2373, found 416.2379 <i>m/z</i> .                                                                                                                                                                                                                                                                                            |

**<sup>1</sup>H NMR of (*R*)-8c**

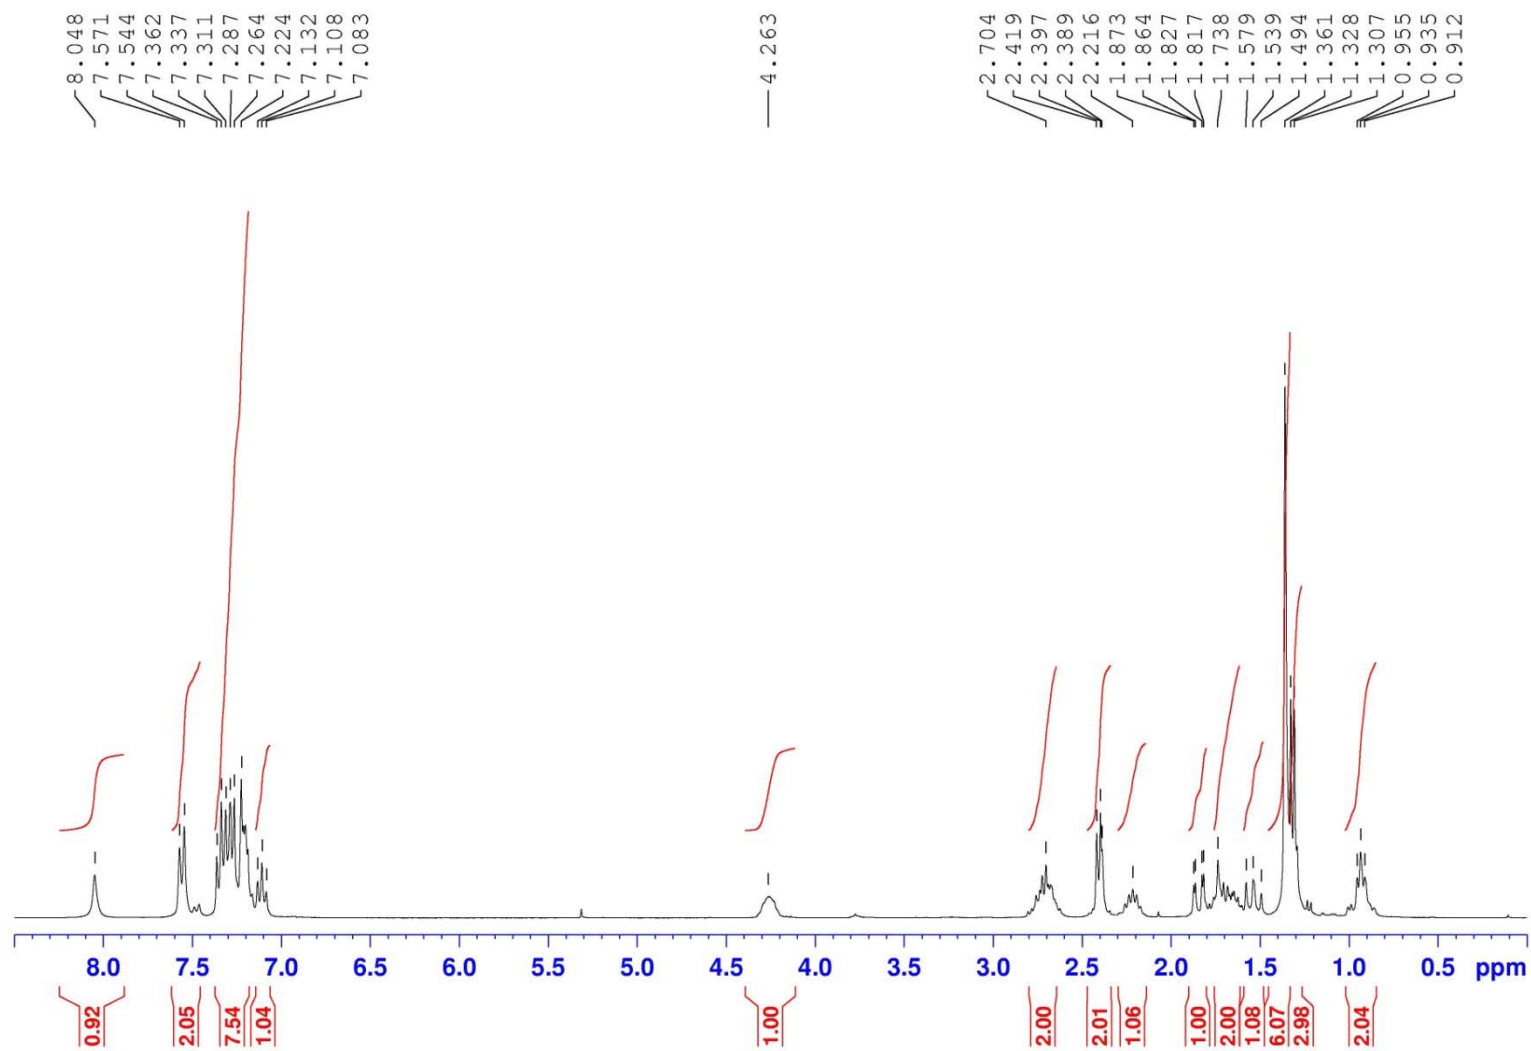

<sup>13</sup>C NMR of (*R*)-8c

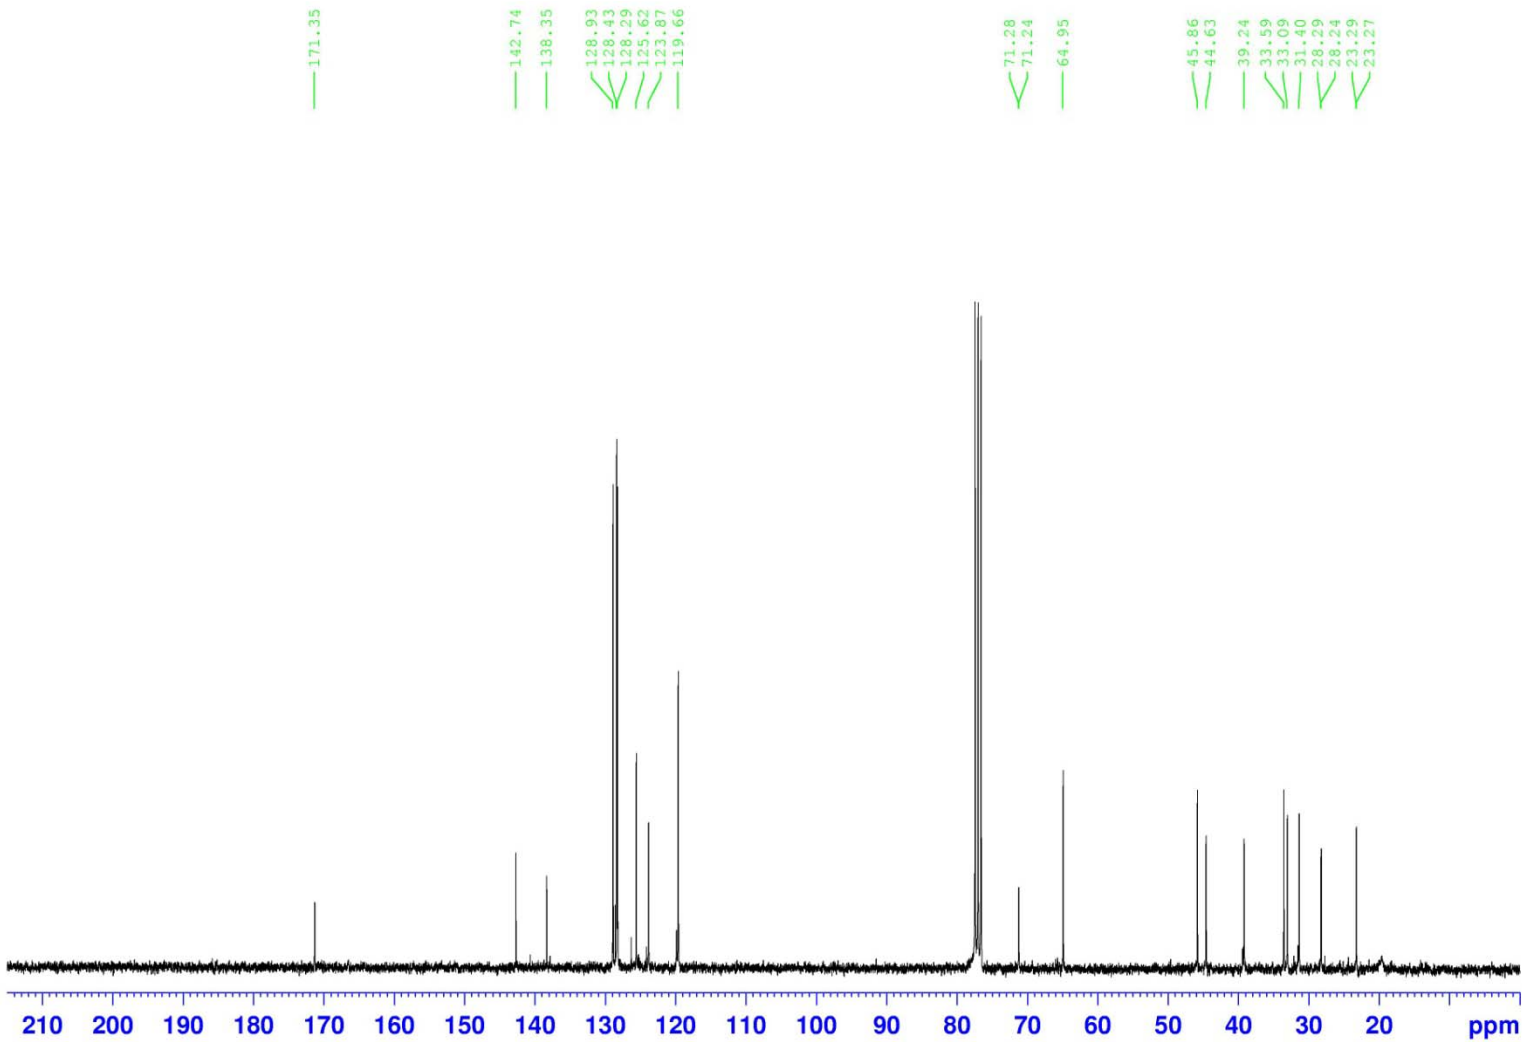

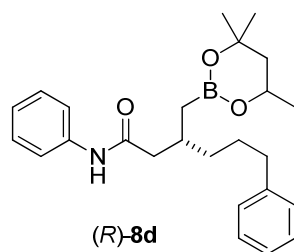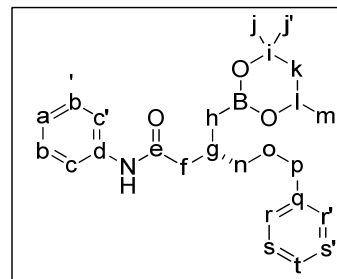

After following the general procedure for the directed CAHB of **7d**, flash chromatography on silica gel (80:20 hexanes:ethyl acetate) affords the title compound (70%) as a light yellow oil.

|                                                       |                                                                                                                                                                                                                                                                                                                                                                                                                                      |
|-------------------------------------------------------|--------------------------------------------------------------------------------------------------------------------------------------------------------------------------------------------------------------------------------------------------------------------------------------------------------------------------------------------------------------------------------------------------------------------------------------|
| <b>Optical rotation</b>                               | $[\alpha]_D^{20} = -14.5^\circ$ ( <i>c</i> 0.5, CHCl <sub>3</sub> )                                                                                                                                                                                                                                                                                                                                                                  |
| <b>TLC analysis</b>                                   | R <sub>f</sub> 0.7 (60:40 hexanes:ethyl acetate)                                                                                                                                                                                                                                                                                                                                                                                     |
| <b><sup>1</sup>H NMR (400 MHz, CDCl<sub>3</sub>)</b>  | δ 7.99 (1H, br s, NH), 7.55 (2H, d, <i>J</i> = 7.8 Hz, c,c'), 7.33 (2H, t, <i>J</i> = 7.7 Hz, b,b'), 7.30–7.25 (2H, m, s,s'), 7.25–7.15 (3H, m, r,r',t), 7.11 (1H, t, <i>J</i> = 7.3 Hz, a), 4.25–4.15 (1H, m, l), 2.70–2.50 (2H, m, p), 2.40–2.30 (2H, m, f), 2.25–2.10 (1H, m, g), 1.81 (1H, dd, <i>J</i> = 14.0 Hz, 2.6 Hz, k), 1.80–1.65 (2H, m, o), 1.55–1.40 (2H, m, k,n), 1.35–1.25 (10H, m, n,j,j',m), 0.95–0.85 (2H, m, h). |
| <b><sup>13</sup>C NMR (100 MHz, CDCl<sub>3</sub>)</b> | δ 171.51 (e), 142.71 (q), 138.36 (d), 128.92 (b,b'), 128.42 (s,s'), 128.20 (r,r'), 125.57 (t), 123.84 (a), 119.63 (c,c'), 71.13 (i), 64.86 (l), 45.81 (k), 44.77 (f), 36.82 (n), 36.04 (p), 33.20 (g), 31.35 (h), 29.71 and 29.04 (j,j'), 28.15 (o), and 23.23 (m).                                                                                                                                                                  |
| <b>IR (neat)</b>                                      | 2973 (N-H stretch), 2925, 2854, 1649 (C=O stretch), 1595, 1495 (N-H bend), 1386, 1378, 1307, 1239 (C-N stretch), 1143 (C-O stretch), 1119 (C-O stretch), 966, 868, 772, 749, 698 cm <sup>-1</sup> .                                                                                                                                                                                                                                  |
| <b>HRMS (CI)</b>                                      | Calcd. for C <sub>25</sub> H <sub>35</sub> BNO <sub>3</sub> (M+H): 408.2710, found 408.2711 <i>m/z</i> .                                                                                                                                                                                                                                                                                                                             |

**<sup>1</sup>H NMR of (*R*)-8d**

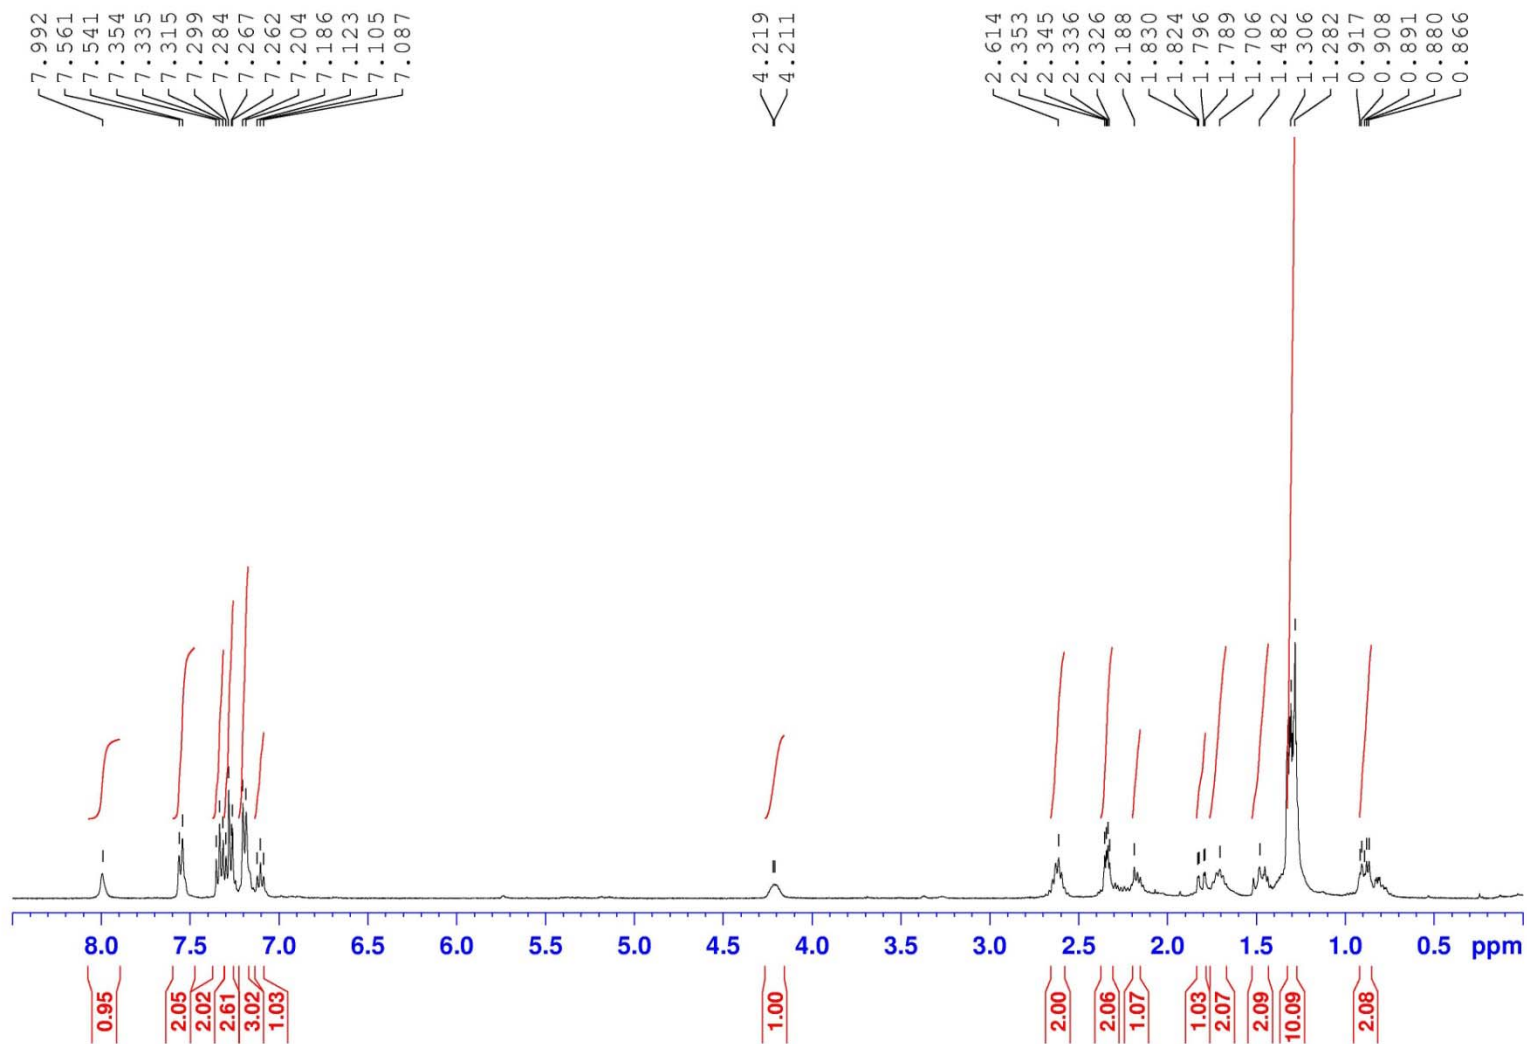

**<sup>13</sup>C NMR of (*R*)-8d**

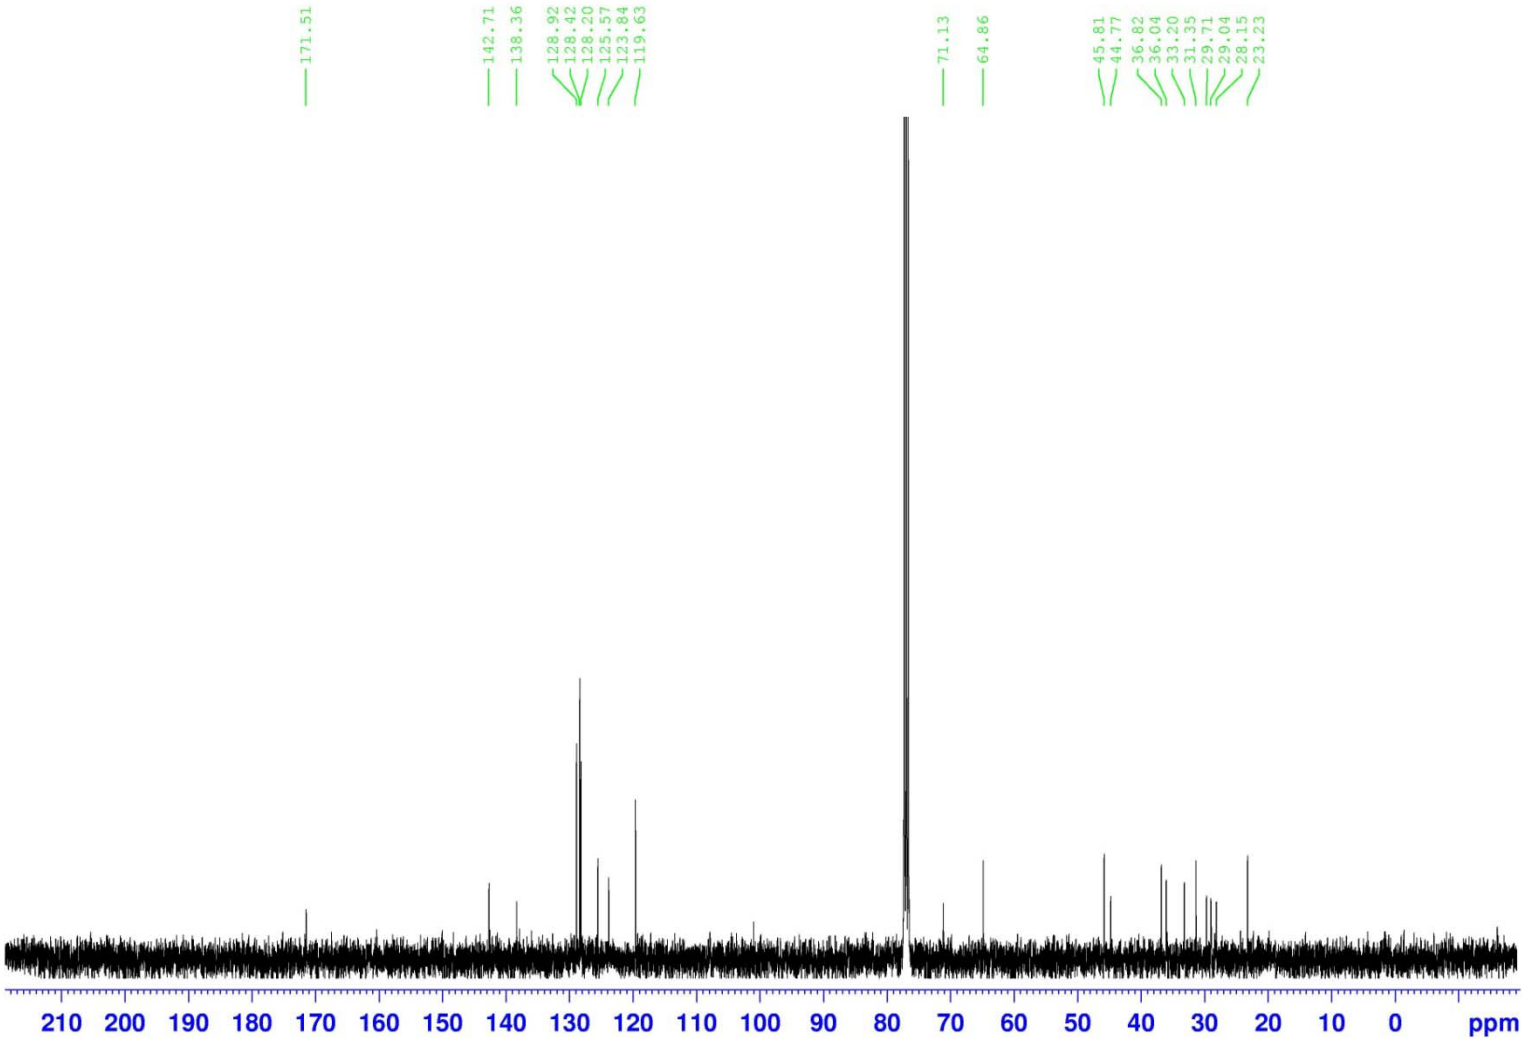

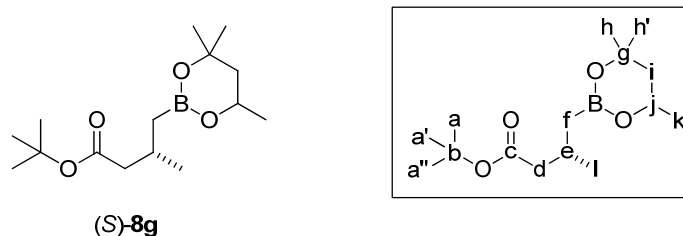

After following the general procedure for the directed CAHB of **7g**, flash chromatography on silica gel (95:5 hexanes:ethyl acetate) affords the title compound (62%) as a light yellow oil.

|                                                       |                                                                                                                                                                                                                                                                                                                                  |
|-------------------------------------------------------|----------------------------------------------------------------------------------------------------------------------------------------------------------------------------------------------------------------------------------------------------------------------------------------------------------------------------------|
| <b>Optical rotation</b>                               | $[\alpha]_{\text{D}}^{20} = -4.0^{\circ}$ ( <i>c</i> 0.5, CHCl <sub>3</sub> )                                                                                                                                                                                                                                                    |
| <b>TLC analysis</b>                                   | R <sub>f</sub> 0.5 (80:20 hexanes:ethyl acetate)                                                                                                                                                                                                                                                                                 |
| <b><sup>1</sup>H NMR (400 MHz, CDCl<sub>3</sub>)</b>  | δ 4.20–4.05 (1H, m, j), 2.25–2.15 (1H, m, d), 2.15–2.05 (1H, m, e), 2.05–1.95 (1H, m, d), 1.75 (1H, dd, <i>J</i> = 13.8 Hz, 2.7 Hz, i), 1.50–1.40 (1H, m, i), 1.43 (9H, s, a, a', a''), 1.26 (6H, s, h, h'), 1.22 (3H, d, <i>J</i> = 5.8 Hz, k), 0.93 (3H, d, <i>J</i> = 6.3 Hz, l), 0.80–0.70 (1H, m, f), 0.65–0.50 (1H, m, f). |
| <b><sup>13</sup>C NMR (100 MHz, CDCl<sub>3</sub>)</b> | δ 172.96 (c), 79.50 (b), 70.39 (g), 64.44 (j), 45.95 (i), 45.19 (e), 45.15 (d), 31.25 (f), 28.13 (a, a', a''), 27.24 and 27.21 (h, h'), 23.18 (k), 22.01 and 21.98 (l).                                                                                                                                                          |
| <b>IR (neat)</b>                                      | 2979, 2930, 1725 (C=O stretch), 1474, 1440, 1366, 1319, 1248, 1141 (C-O stretch), 1051, 968, 917, 846, 750, 733, 681, 667 cm <sup>-1</sup> .                                                                                                                                                                                     |
| <b>HRMS (CI)</b>                                      | Calcd. for C <sub>15</sub> H <sub>30</sub> BO <sub>4</sub> (M+H): 285.2237, found 285.2243 <i>m/z</i> .                                                                                                                                                                                                                          |



**<sup>1</sup>H NMR of (S)-8g**

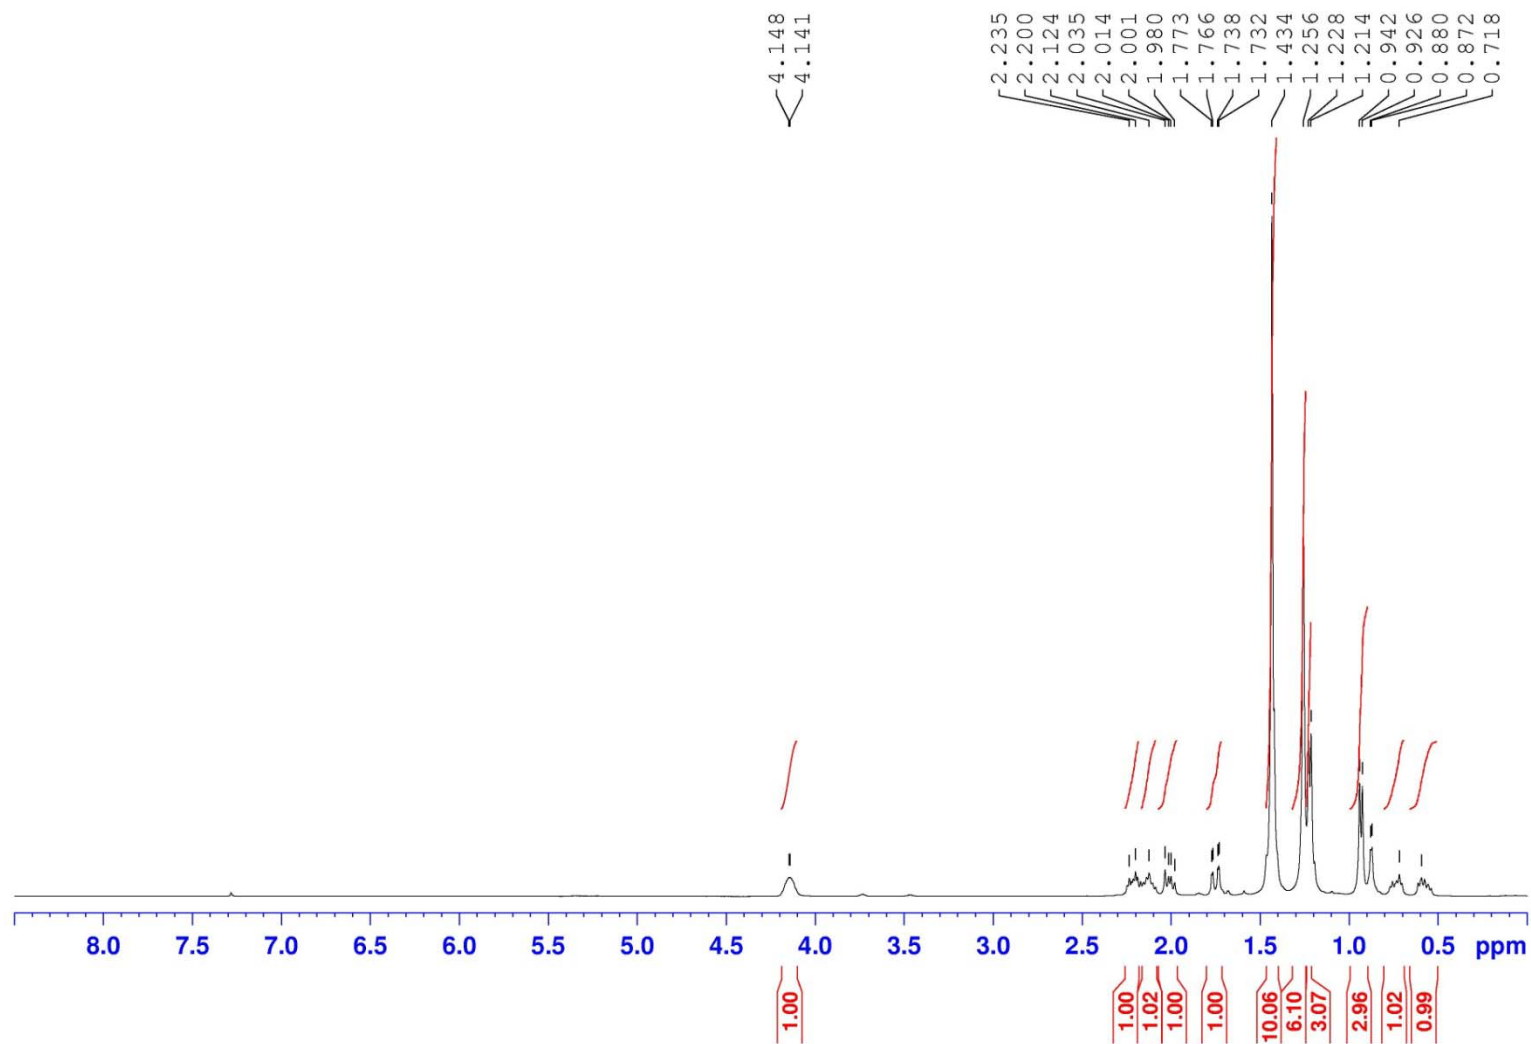

<sup>13</sup>C NMR of (*S*)-8g

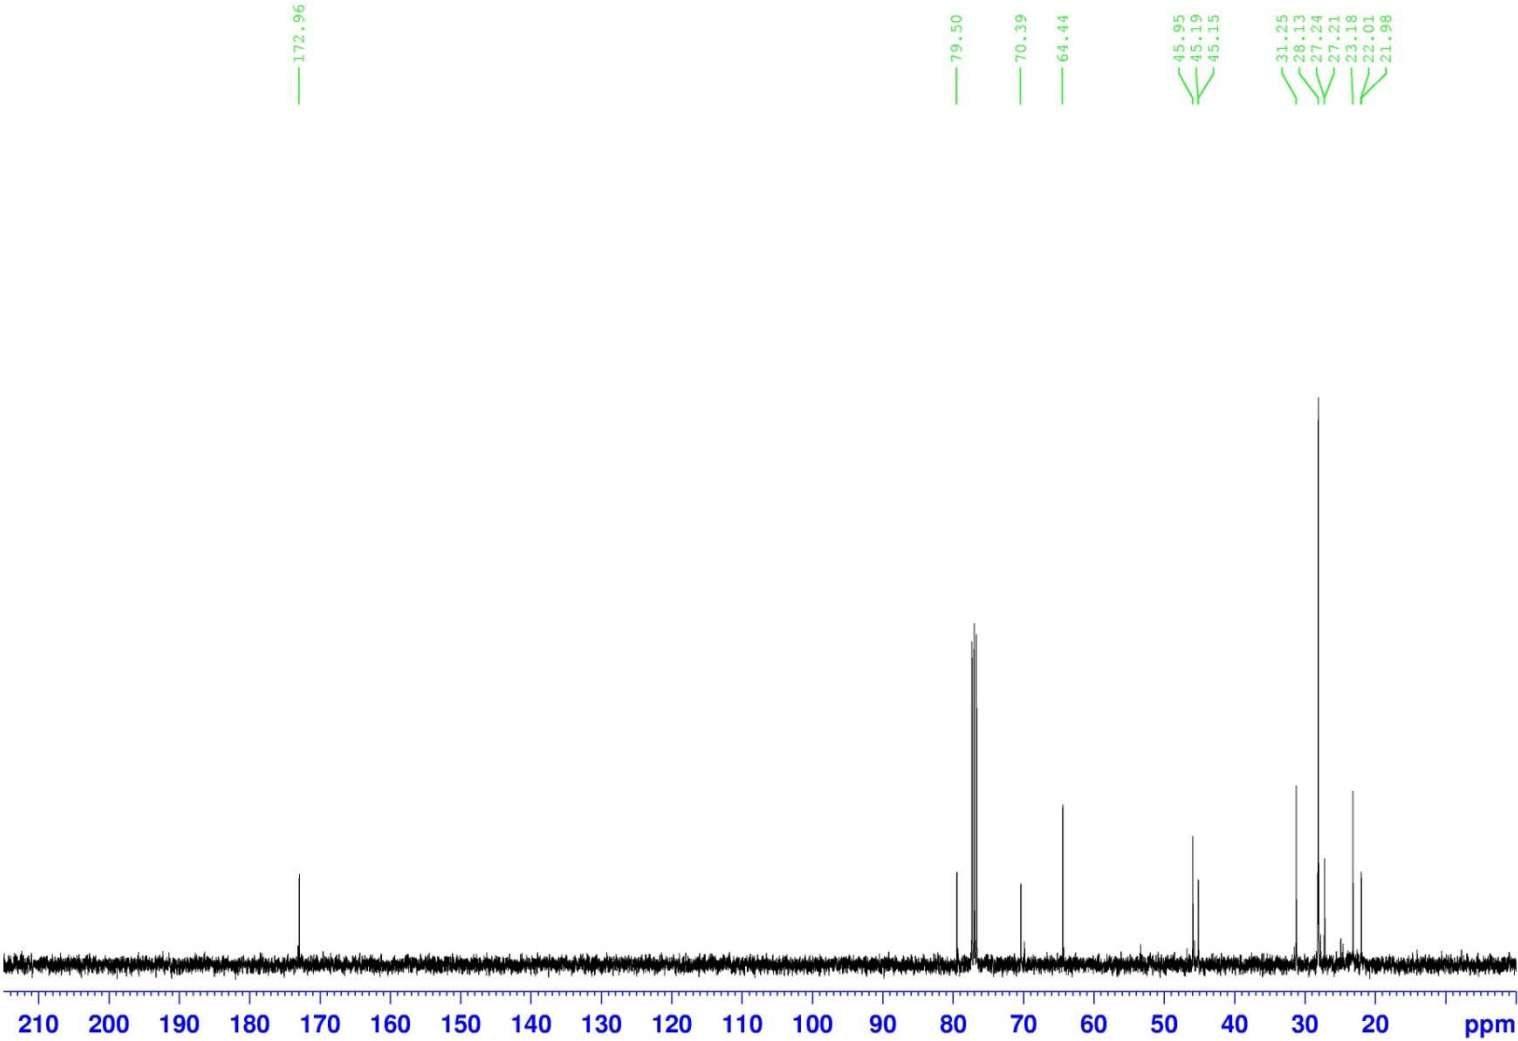

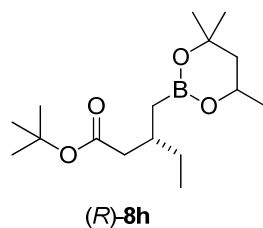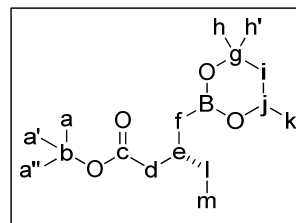

After following the general procedure for the directed CAHB of **7h**, flash chromatography on silica gel (95:5 hexanes:ethyl acetate) affords the title compound (65%) as a light yellow oil.

|                                                      |                                                                                                                                                                                                                                                                                                                                                 |
|------------------------------------------------------|-------------------------------------------------------------------------------------------------------------------------------------------------------------------------------------------------------------------------------------------------------------------------------------------------------------------------------------------------|
| <b>Optical rotation</b>                              | $[\alpha]_{\text{D}}^{20} = -3.8^{\circ}$ ( <i>c</i> 0.5, CHCl <sub>3</sub> )                                                                                                                                                                                                                                                                   |
| <b>TLC analysis</b>                                  | <i>R<sub>f</sub></i> 0.5 (80:20 hexanes:ethyl acetate)                                                                                                                                                                                                                                                                                          |
| <b><sup>1</sup>H NMR (300 MHz, CDCl<sub>3</sub>)</b> | δ 4.25–4.10 (1H, m, j), 2.19 (2H, dd, <i>J</i> = 6.9 Hz, 2.6 Hz, d), 2.05–1.95 (1H, m, e), 1.77 (1H, dd, <i>J</i> = 13.8 Hz, 3.0 Hz, i), 1.50–1.40 (1H, m, i), 1.46 (9H, s, a, a', a''), 1.40–1.30 (2H, m, l), 1.28 (6H, s, h, h'), 1.24 (3H, d, <i>J</i> = 6.2 Hz, k), 0.88 (3H, t, <i>J</i> = 7.4 Hz, m), 0.69 (2H, d, <i>J</i> = 6.8 Hz, f). |
| <b><sup>13</sup>C NMR (75 MHz, CDCl<sub>3</sub>)</b> | δ 173.24 (c), 79.51 (b), 70.39 (g), 64.41 (j), 45.96 (i), 42.33 (d), 33.27 (e), 31.28 (f), 28.94 (l), 28.16 (a, a', a''), 28.06 (h, h'), 23.21 (k), 11.19 (m).                                                                                                                                                                                  |
| <b>IR (neat)</b>                                     | 2976, 2926, 1726 (C=O stretch), 1456, 1379, 1315, 1246, 1213, 1138 (C-O stretch), 966, 850, 669, 518 cm <sup>-1</sup> .                                                                                                                                                                                                                         |
| <b>HRMS (CI)</b>                                     | calcd. for C <sub>16</sub> H <sub>32</sub> BO <sub>4</sub> (M+H): 299.2394, found 299.2397 <i>m/z</i> .                                                                                                                                                                                                                                         |

**<sup>1</sup>H NMR of (*R*)-8h**

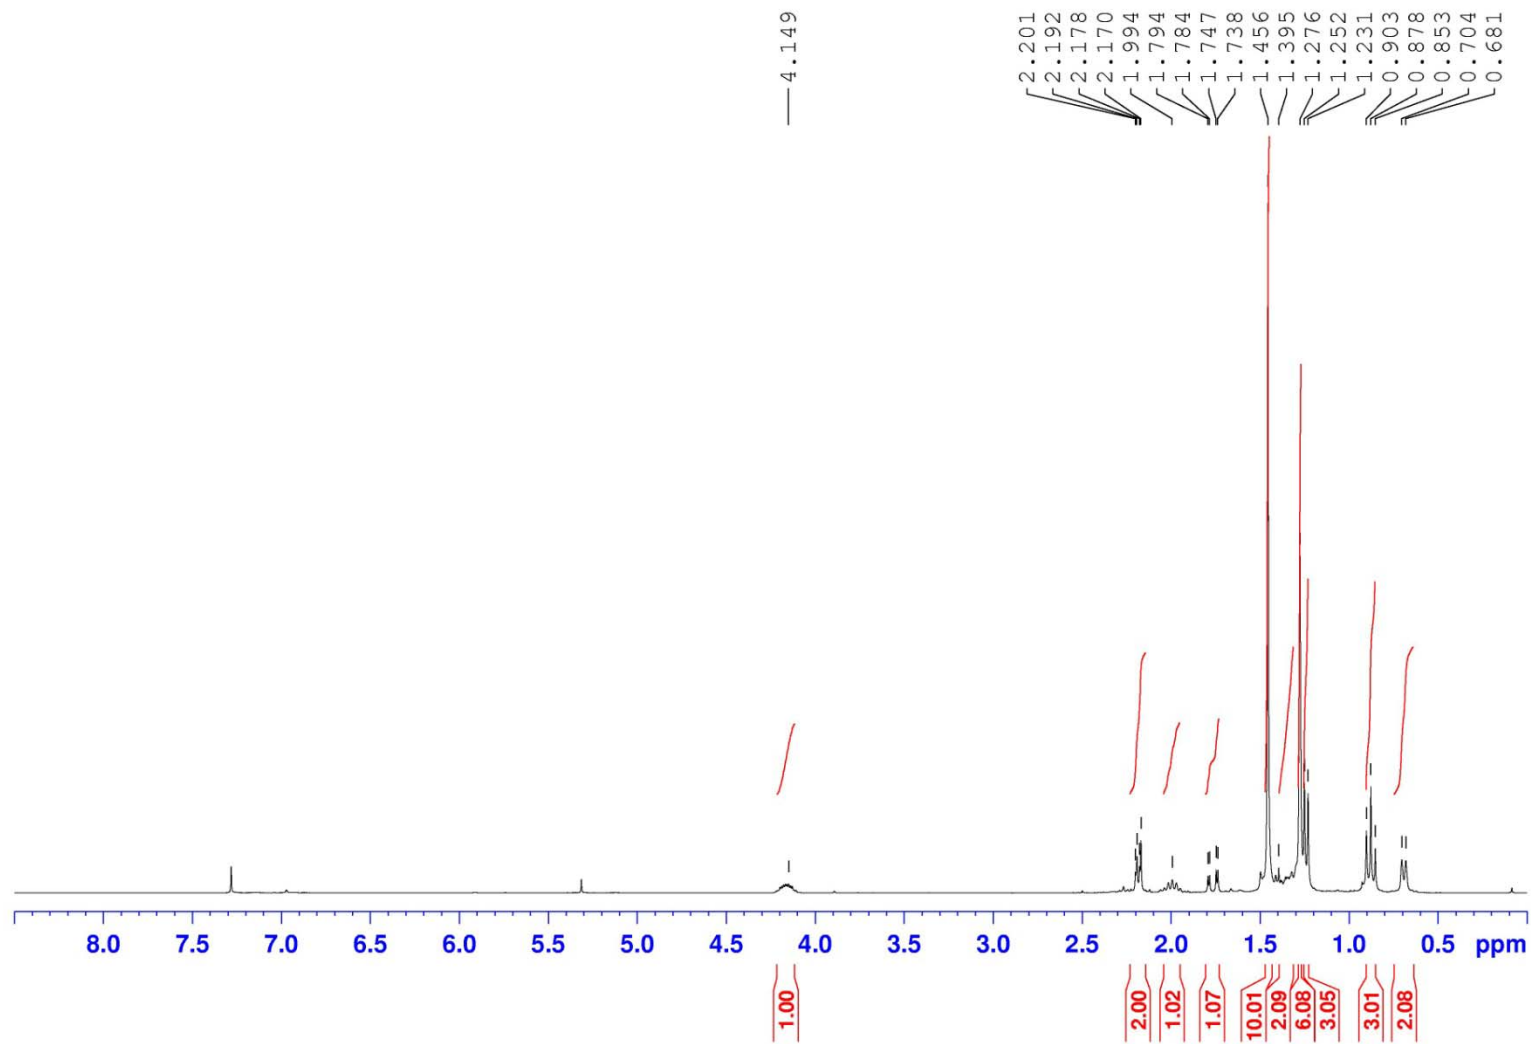

**$^{13}\text{C}$  NMR of (*R*)-8h**

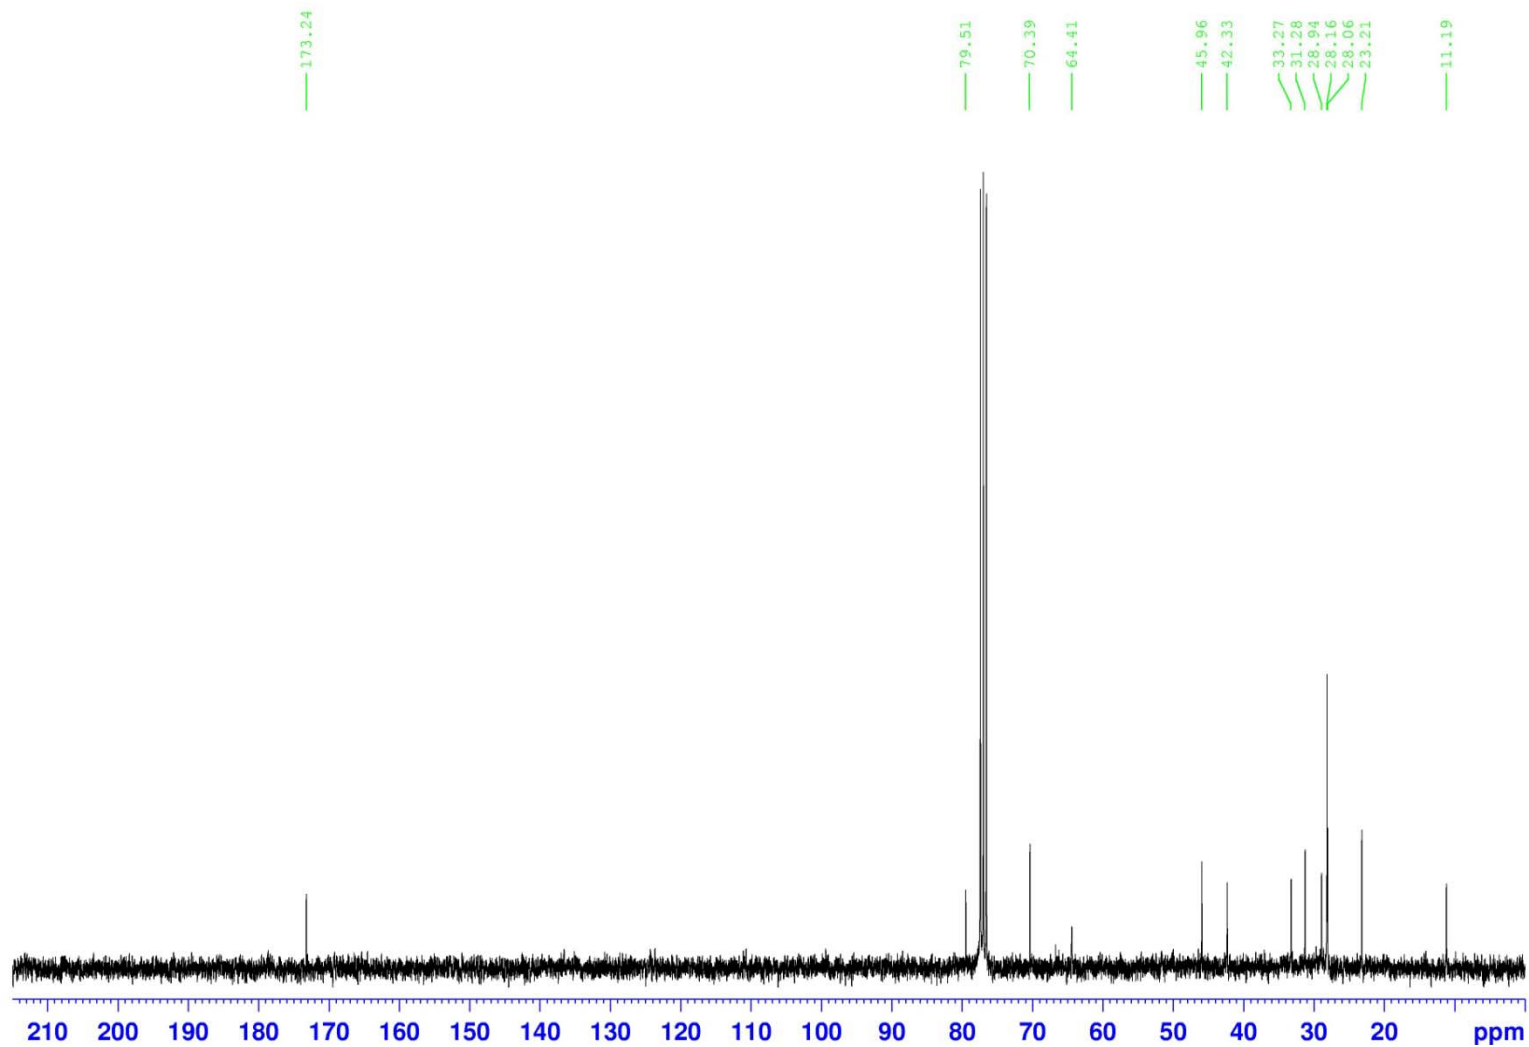

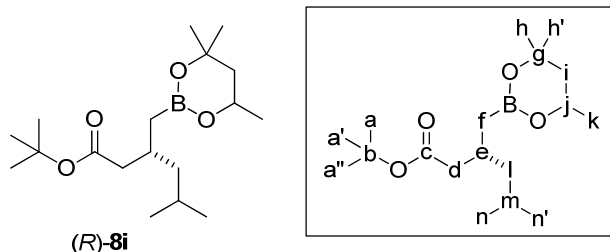

After following the general procedure for the directed CAHB of **7i**, flash chromatography on silica gel (95:5 hexanes:ethyl acetate) affords the title compound (78%) as a light yellow oil.

|                                                      |                                                                                                                                                                                                                                                                                                                            |
|------------------------------------------------------|----------------------------------------------------------------------------------------------------------------------------------------------------------------------------------------------------------------------------------------------------------------------------------------------------------------------------|
| <b>Optical rotation</b>                              | $[\alpha]_{\text{D}}^{20} = -2.7^{\circ}$ ( <i>c</i> 0.5, CHCl <sub>3</sub> )                                                                                                                                                                                                                                              |
| <b>TLC analysis</b>                                  | R <sub>f</sub> 0.5 (80:20 hexanes:ethyl acetate)                                                                                                                                                                                                                                                                           |
| <b><sup>1</sup>H NMR (300 MHz, CDCl<sub>3</sub>)</b> | δ 4.20–4.10 (1H, m, j), 2.20–2.05 (3H, m, d,e), 1.77 (1H, dd, <i>J</i> = 13.8 Hz, 2.8 Hz, i), 1.70–1.55 (1H, m, m), 1.50–1.40 (1H, m, i), 1.46 (9H, s, a,a',a''), 1.28 (6H, s, h,h'), 1.24 (3H, d, <i>J</i> = 6.2 Hz, k), 1.13 (2H, t, <i>J</i> = 5.9 Hz, l), 0.90–0.85 (6H, m, n,n'), 0.69 (2H, d, <i>J</i> = 5.9 Hz, f). |
| <b><sup>13</sup>C NMR (75 MHz, CDCl<sub>3</sub>)</b> | δ 173.16 (c), 79.51 (b), 70.39 (g), 64.43 (j), 46.21 (l), 45.97 (i), 43.17 (d), 31.30 (f), 29.62 (e), 28.16 (a,a',a''), 28.06 (h,h'), 25.32 (m), 23.21 (k), 23.15, 23.04, 22.83, 22.64 (n,n').                                                                                                                             |
| <b>IR (neat)</b>                                     | 2971, 2931, 2870, 1725 (C=O stretch), 1456, 1389, 1366, 1300, 1206, 1156 (C-O stretch), 1134 (C-O stretch), 956, 846, 739 cm <sup>-1</sup> .                                                                                                                                                                               |
| <b>HRMS (ESI)</b>                                    | Calcd. for C <sub>18</sub> H <sub>35</sub> NaBO <sub>4</sub> (M+Na): 349.2526, found 349.2515 <i>m/z</i> .                                                                                                                                                                                                                 |

**<sup>1</sup>H NMR of (*R*)-8i**

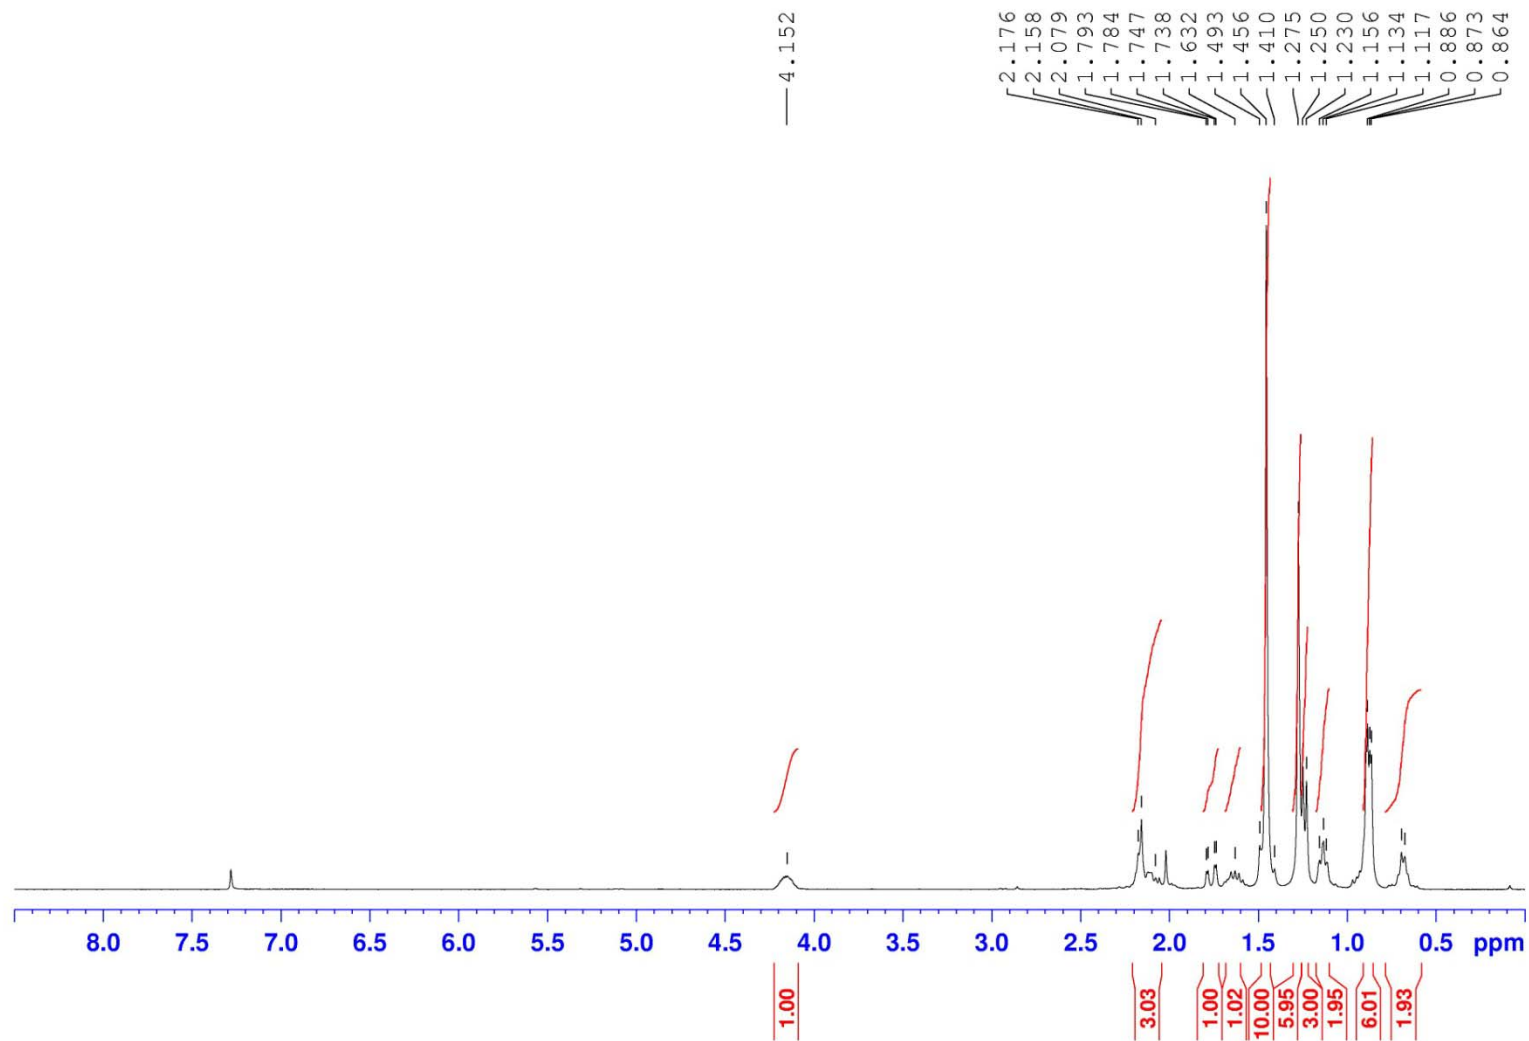

**<sup>13</sup>C NMR of (R)-8i**

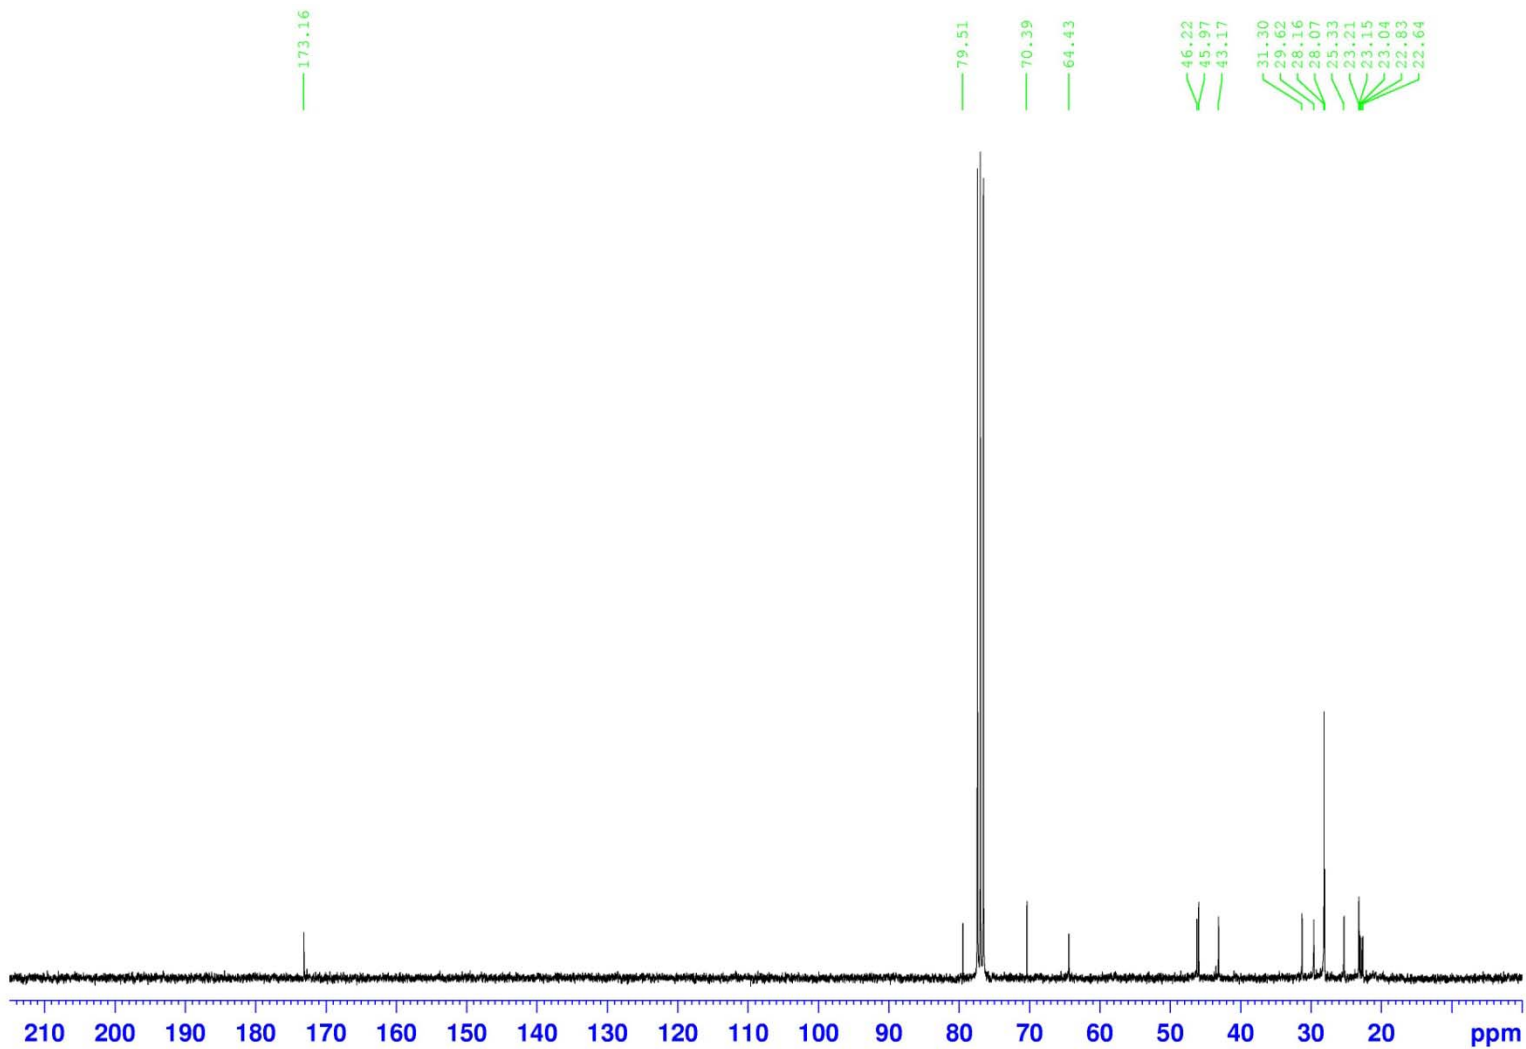



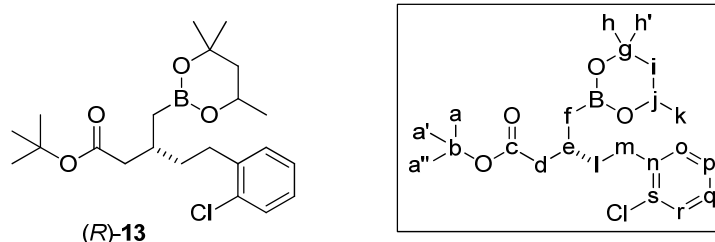

After following the general procedure for the directed CAHB of **12**, flash chromatography on silica gel (95:5 hexanes:ethyl acetate) affords the title compound (74%) as a light yellow oil.

|                                                      |                                                                                                                                                                                                                                                                                                                                                                                                                                                                                                |
|------------------------------------------------------|------------------------------------------------------------------------------------------------------------------------------------------------------------------------------------------------------------------------------------------------------------------------------------------------------------------------------------------------------------------------------------------------------------------------------------------------------------------------------------------------|
| <b>Optical rotation</b>                              | $[\alpha]_{\text{D}}^{20} = -4.5^{\circ}$ ( <i>c</i> 0.5, CHCl <sub>3</sub> )                                                                                                                                                                                                                                                                                                                                                                                                                  |
| <b>TLC analysis</b>                                  | R <sub>f</sub> 0.5 (80:20 hexanes:ethyl acetate)                                                                                                                                                                                                                                                                                                                                                                                                                                               |
| <b><sup>1</sup>H NMR (300 MHz, CDCl<sub>3</sub>)</b> | δ 7.32 (1H, dd, <i>J</i> = 7.6 Hz, 1.2 Hz, r), 7.23 (1H, dd, <i>J</i> = 7.5 Hz, 1.9 Hz, p), 7.18 (1H, dd, <i>J</i> = 7.2 Hz, 1.5 Hz, o), 7.12 (1H, dd, <i>J</i> = 7.6 Hz, 2.1 Hz, q), 4.25–4.10 (1H, m, j), 2.80–2.70 (2H, m, m), 2.35–2.25 (2H, m, d), 2.25–2.10 (1H, m, e), 1.77 (1H, dd, <i>J</i> = 13.8 Hz, 2.9 Hz, i), 1.70–1.55 (2H, m, l), 1.55–1.40 (1H, m, i), 1.46 (9H, s, a, a', a''), 1.28 (6H, s, h, h'), 1.24 (3H, d, <i>J</i> = 6.2 Hz, k), 0.82 (2H, d, <i>J</i> = 6.2 Hz, f). |
| <b><sup>13</sup>C NMR (75 MHz, CDCl<sub>3</sub>)</b> | δ 172.90 (c), 140.65 (n), 133.84 (s), 130.29 (r), 129.33 (q), 126.99 (o), 126.67 (p), 79.71 and 79.70 (b), 70.51 (g), 64.52 (j), 45.94 (i), 42.56 (d), 36.45 (l), 31.82 (m), 31.28 (f), 31.08 (e), 28.16 (a, a', a''), 28.11 (h, h'), 23.20 (k).                                                                                                                                                                                                                                               |
| <b>IR (neat)</b>                                     | 2978, 2930, 1724 (C=O stretch), 1475, 1443, 1366, 1320, 1240, 1142 (C-O stretch), 1050, 968, 917, 846, 750, 732, 680, 647 cm <sup>-1</sup> .                                                                                                                                                                                                                                                                                                                                                   |
| <b>HRMS (ESI)</b>                                    | Calcd. for C <sub>22</sub> H <sub>34</sub> NaBClO <sub>4</sub> (M+Na): 431.2136, found 431.2145 <i>m/z</i> .                                                                                                                                                                                                                                                                                                                                                                                   |

**<sup>1</sup>H NMR of (*R*)-13**

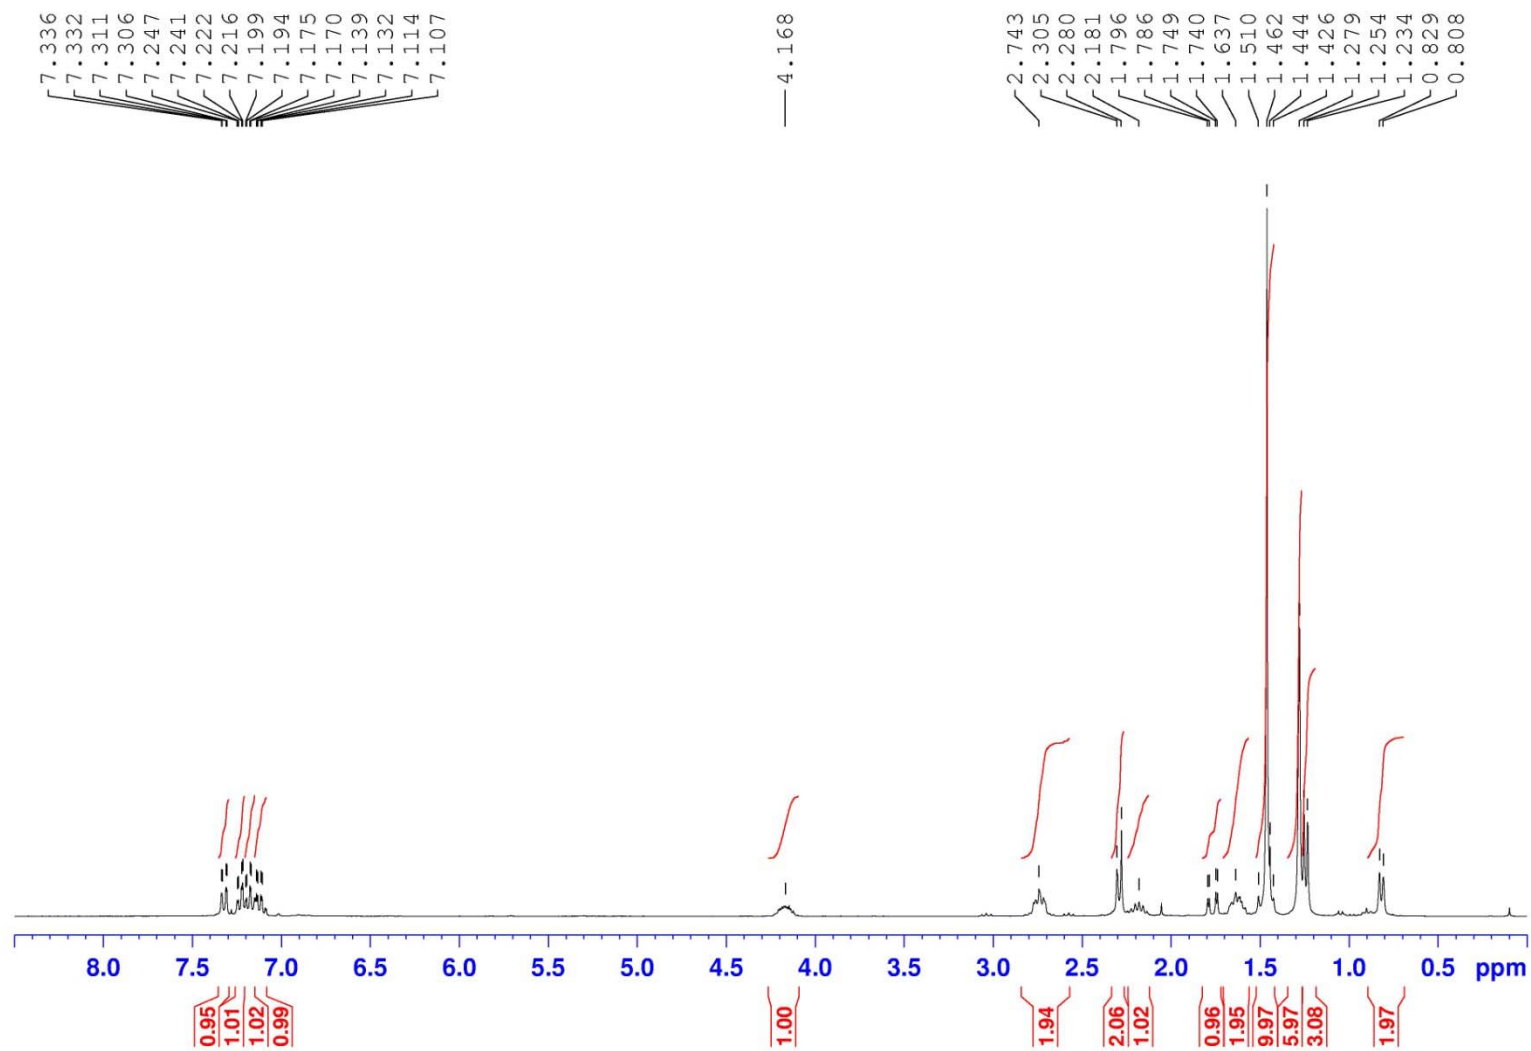

**$^{13}\text{C}$  NMR of (*R*)-13**

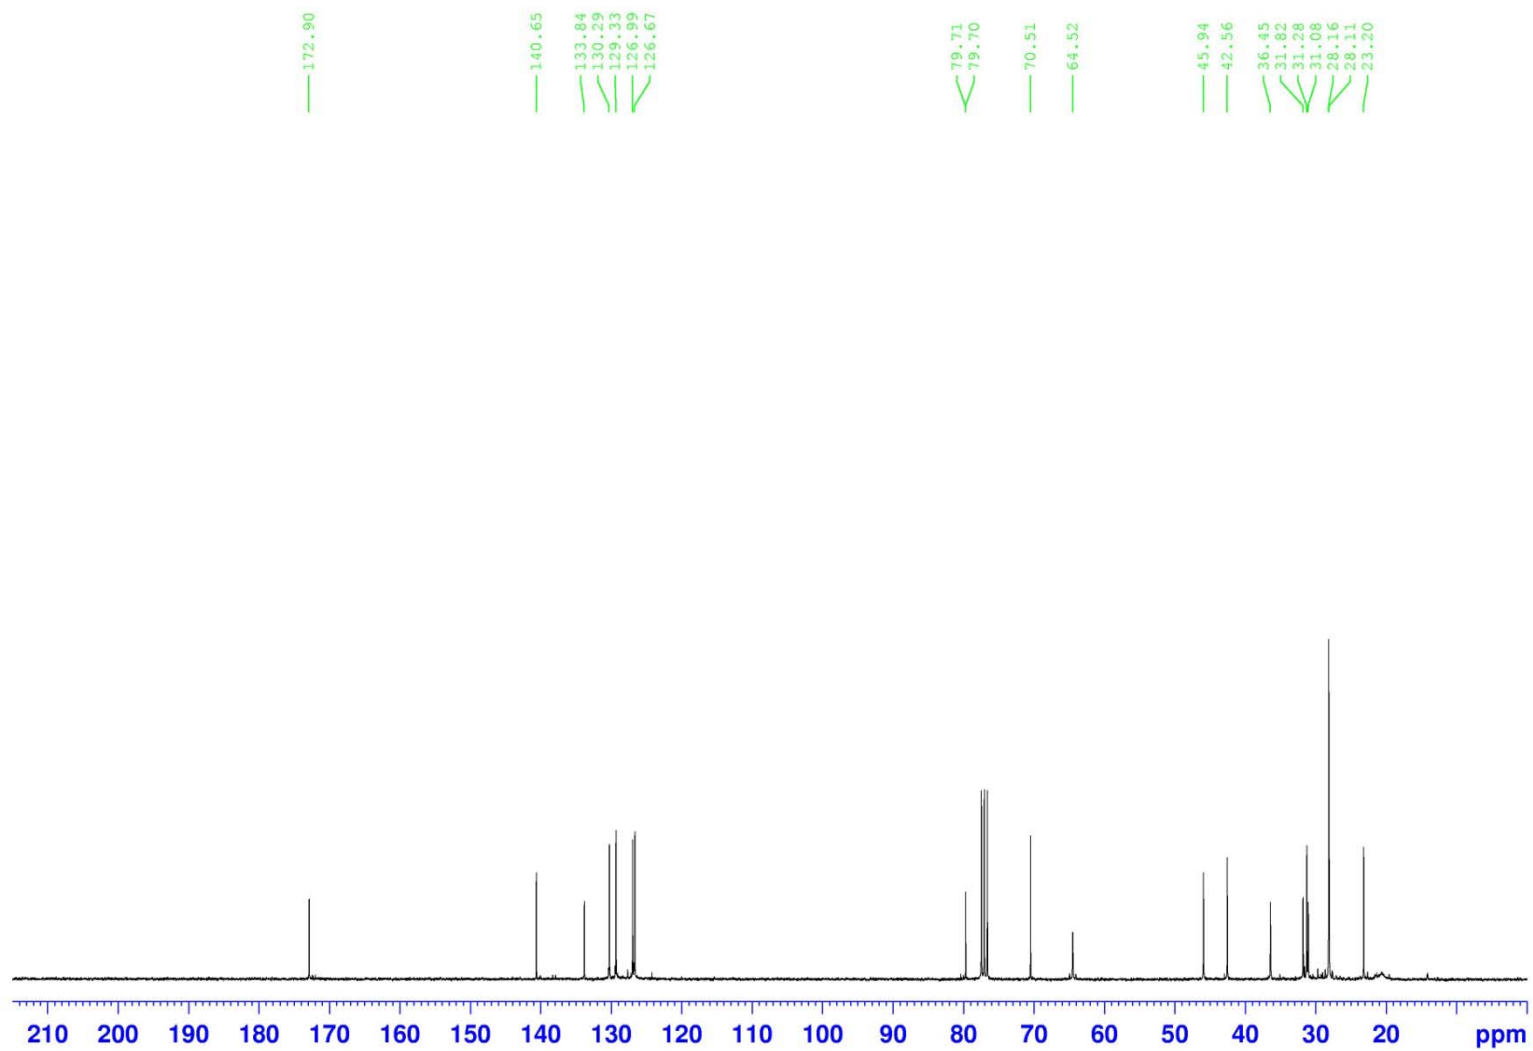

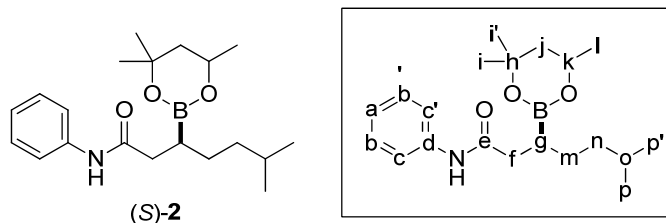

After following the general procedure for the directed CAHB of **1**, flash chromatography on silica gel (95:5 hexanes:ethyl acetate) affords the title compound (79%) as a light yellow oil.

|                                                       |                                                                                                                                                                                                                                                                                                                                                                                              |
|-------------------------------------------------------|----------------------------------------------------------------------------------------------------------------------------------------------------------------------------------------------------------------------------------------------------------------------------------------------------------------------------------------------------------------------------------------------|
| <b>Optical rotation</b>                               | $[\alpha]_{\text{D}}^{20} = -7.9^{\circ}$ ( <i>c</i> 0.5, CHCl <sub>3</sub> )                                                                                                                                                                                                                                                                                                                |
| <b>TLC analysis</b>                                   | R <sub>f</sub> 0.7 (80:20 hexanes:ethyl acetate)                                                                                                                                                                                                                                                                                                                                             |
| <b><sup>1</sup>H NMR (400 MHz, CDCl<sub>3</sub>)</b>  | δ 7.59 (1H, br s, NH), 7.52 (2H, d, <i>J</i> = 7.1 Hz, c,c'), 7.32 (2H, t, <i>J</i> = 7.4 Hz, b,b'), 7.09 (1H, t, <i>J</i> = 7.2 Hz, a), 4.30–4.15 (1H, m, k), 4.30–4.10 (1H, m, k), 2.55–2.40 (1H, m, f), 2.40–2.20 (4H, m, f,g,m), 1.85–1.65 (2H, m, j,o), 1.60–1.45 (3H, m, j,n), 1.29 (6H, s, j,j'), 1.26 (3H, dd, <i>J</i> = 6.2 Hz, 2.1 Hz, l), 0.89 (6H, d, <i>J</i> = 6.4 Hz, p,p'). |
| <b><sup>13</sup>C NMR (100 MHz, CDCl<sub>3</sub>)</b> | δ 172.34 (e), 138.39 (d), 128.90 (b,b'), 123.72 (a), 119.60 (c,c'), 70.80 (h), 64.80 and 64.76 (k), 45.93 and 45.89 (j), 39.79 (f), 38.67 (n), 38.11 and 38.05 (g), 31.28 and 27.99 (i,i'), 29.08 (o), 28.20 (m), 23.22 (l), 22.59 (p,p').                                                                                                                                                   |
| <b>IR (neat)</b>                                      | 3304 (N-H stretch), 2973, 1660 (C=O stretch), 1600, 1541 (N-H stretch), 1442, 1391, 1369, 1302 (C-O stretch), 1209 (C-N stretch), 1161, 898, 756 cm <sup>-1</sup> .                                                                                                                                                                                                                          |
| <b>HRMS (ESI)</b>                                     | Calcd. for C <sub>20</sub> H <sub>32</sub> NaBNO <sub>3</sub> (M+Na): 368.2373, found 368.2364 <i>m/z</i> .                                                                                                                                                                                                                                                                                  |

**<sup>1</sup>H NMR of (S)-2**

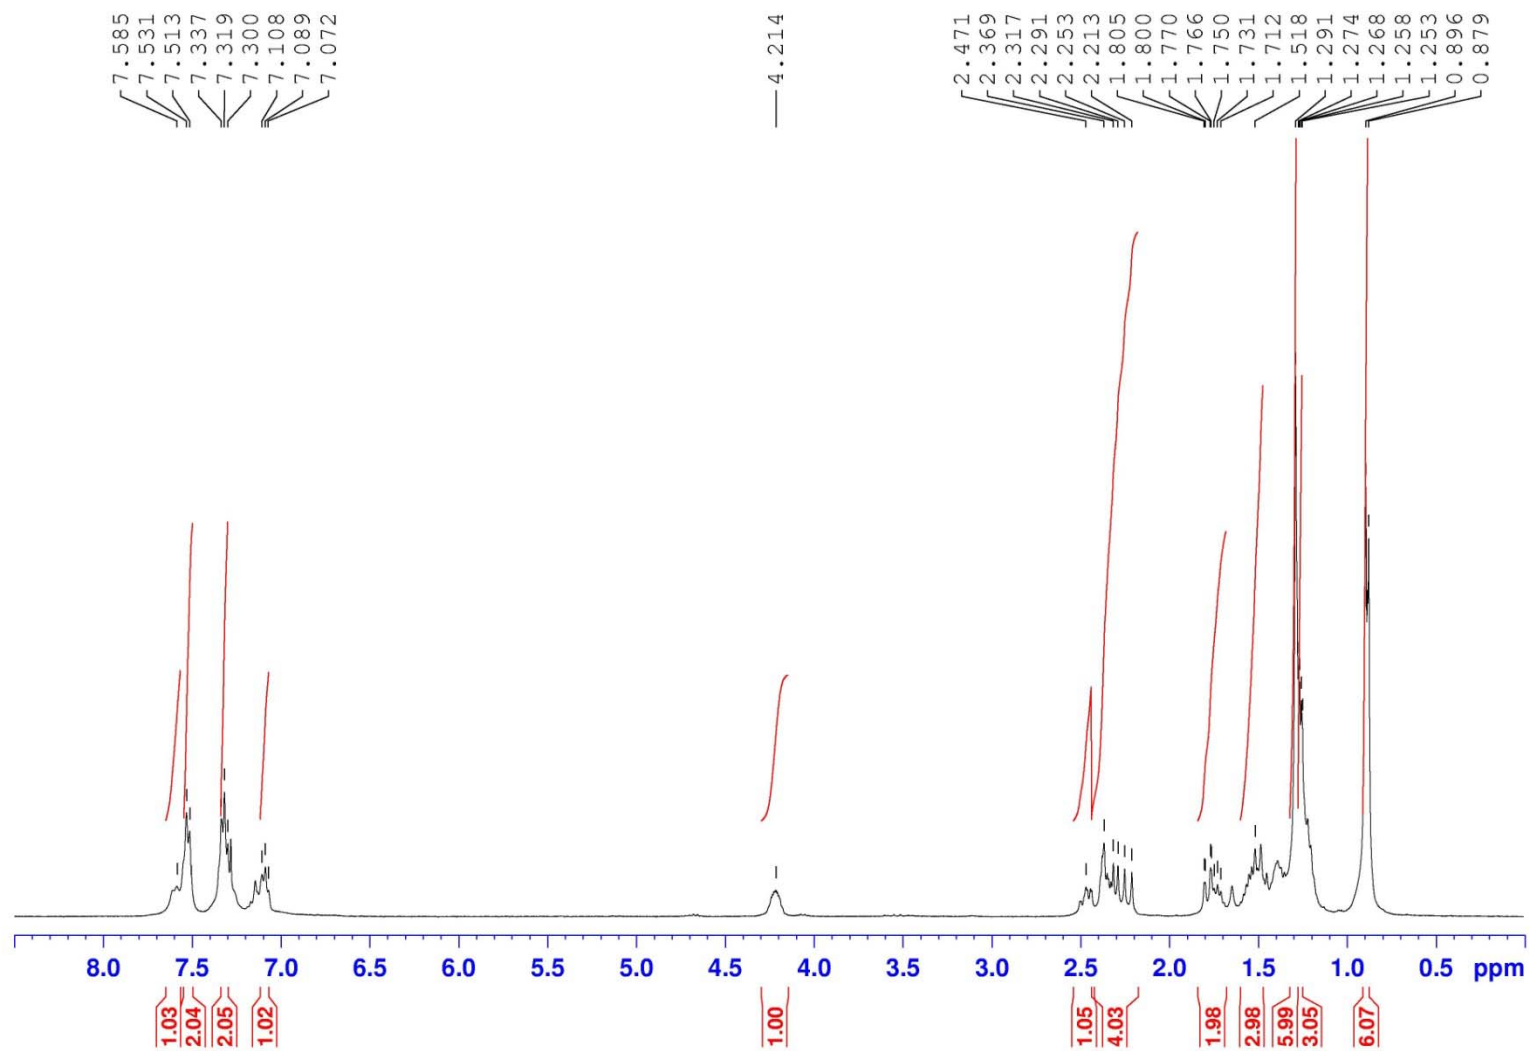

**$^{13}\text{C}$  NMR of (*S*)-2**

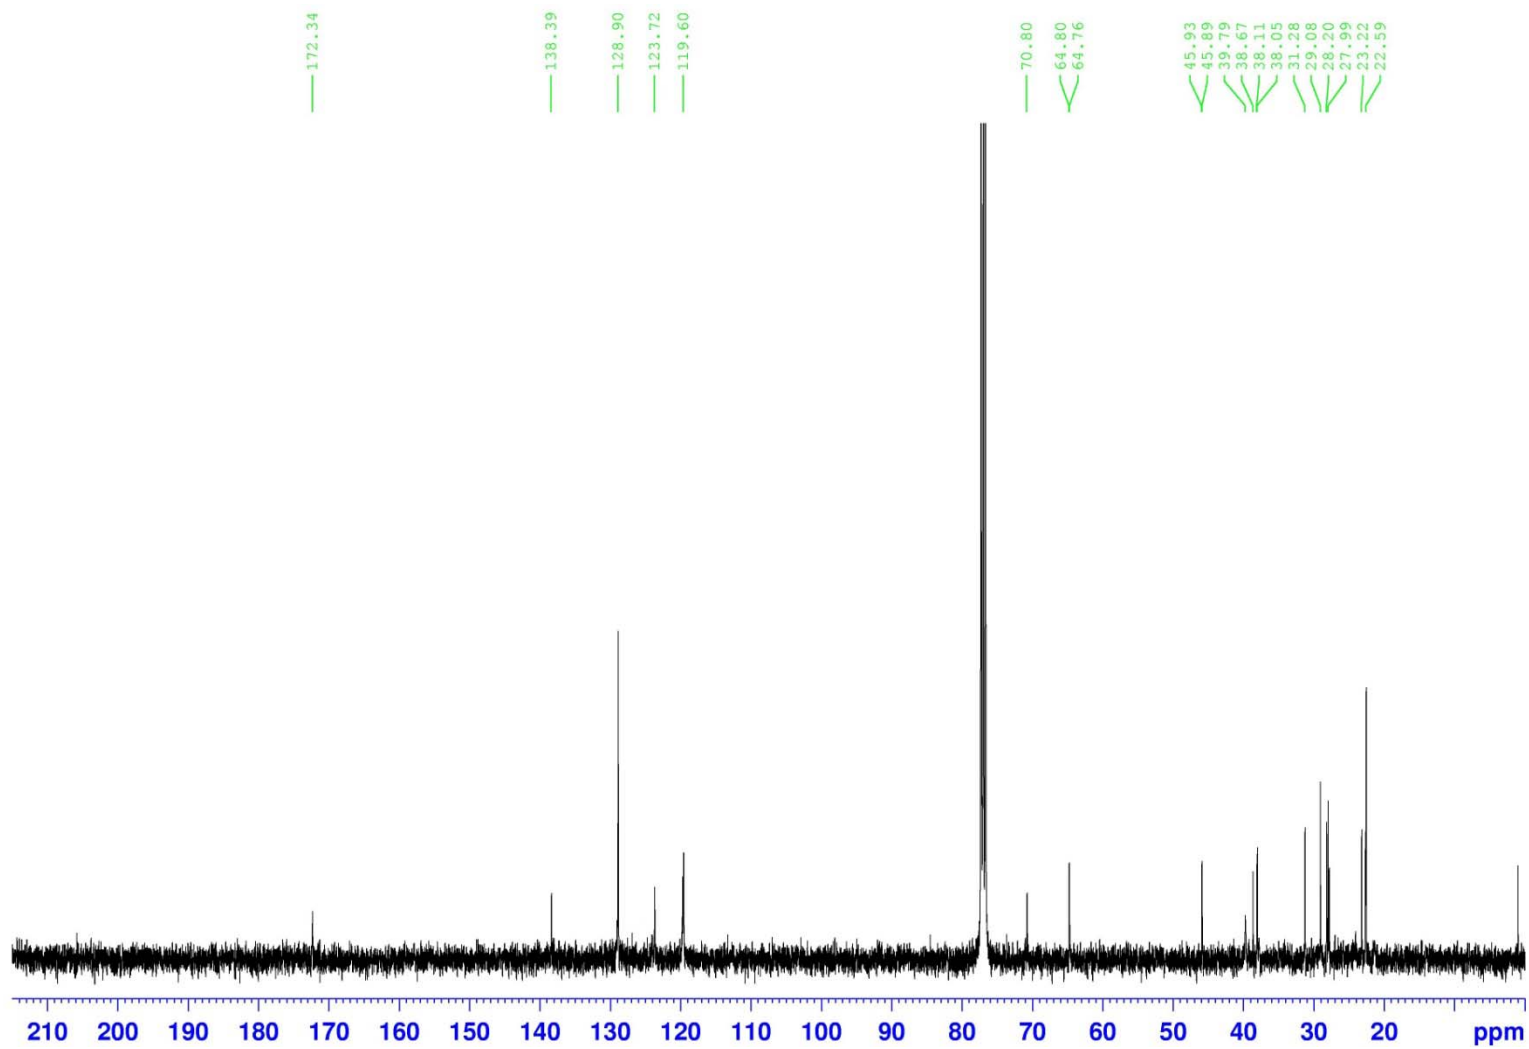

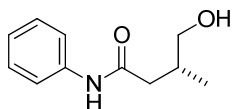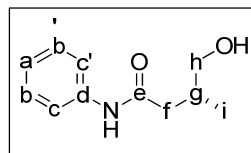

Oxidation of (*S*)-**8a** using the general procedure for small scale oxidation of purified organoboronates with H<sub>2</sub>O<sub>2</sub> affords, after flash chromatography on silica gel (80–40:20–60 hexanes:ethyl acetate), the title compound (97%) as a white solid.

|                                                      |                                                                                                                                                                                                                                                                                                                                                                             |
|------------------------------------------------------|-----------------------------------------------------------------------------------------------------------------------------------------------------------------------------------------------------------------------------------------------------------------------------------------------------------------------------------------------------------------------------|
| <b>m.p.</b>                                          | 115–117 °C                                                                                                                                                                                                                                                                                                                                                                  |
| <b>Optical rotation</b>                              | $[\alpha]_{\text{D}}^{20} = +2.5^{\circ}$ ( <i>c</i> 0.5, CHCl <sub>3</sub> )                                                                                                                                                                                                                                                                                               |
| <b>HPLC analysis</b>                                 | (Chiralpak-IC, 80:20 hexanes:isopropanol) showed peaks at 19 minutes (2.5% ( <i>S</i> )) and 36 minutes (97.5% ( <i>R</i> ))                                                                                                                                                                                                                                                |
| <b>TLC analysis</b>                                  | <i>R<sub>f</sub></i> 0.3 (30:70 hexanes:ethyl acetate)                                                                                                                                                                                                                                                                                                                      |
| <b><sup>1</sup>H NMR (300 MHz, CDCl<sub>3</sub>)</b> | δ 8.21 (1H, br s, OH), 7.51 (2H, d, <i>J</i> = 7.8 Hz, c,c'), 7.30 (2H, t, <i>J</i> = 7.6 Hz, b,b'), 7.10 (1H, t, <i>J</i> = 7.4 Hz, a), 3.70–3.55 (1H, m, h), 3.55–3.40 (2H, m, h,OH), 2.52 and 2.29 (2H, overlapping dd's, <i>J<sub>1</sub></i> = 14.0 Hz, 6.8 Hz, <i>J<sub>2</sub></i> = 14.0 Hz, 6.00 Hz, f), 2.30–2.20 (1H, m, g), 1.00 (3H, d, <i>J</i> = 6.7 Hz, i). |
| <b><sup>13</sup>C NMR (75 MHz, CDCl<sub>3</sub>)</b> | δ 171.71 (e), 137.88 (d), 128.94 (b,b'), 124.40 (a), 120.19 (c,c'), 67.46 (h), 42.16 (f), 33.36 (g), 17.03 (i).                                                                                                                                                                                                                                                             |
| <b>IR (neat)</b>                                     | 3286 (O-H stretch), 3195 (N-H stretch), 3139, 2957, 2928, 1667 (C=O stretch), 1599, 1549 (N-H bend), 1487, 1444, 1376, 1319 (C-O stretch), 1257, 1231 (C-N stretch), 1132, 1047, 754 cm <sup>-1</sup> .                                                                                                                                                                     |
| <b>HRMS (CI)</b>                                     | Calcd. for C <sub>11</sub> H <sub>16</sub> NO <sub>2</sub> (M+H): 194.1181, found 194.1180 <i>m/z</i> .                                                                                                                                                                                                                                                                     |

**<sup>1</sup>H NMR of (*R*)-4-hydroxy-3-methylbutanoic acid phenyl amide**

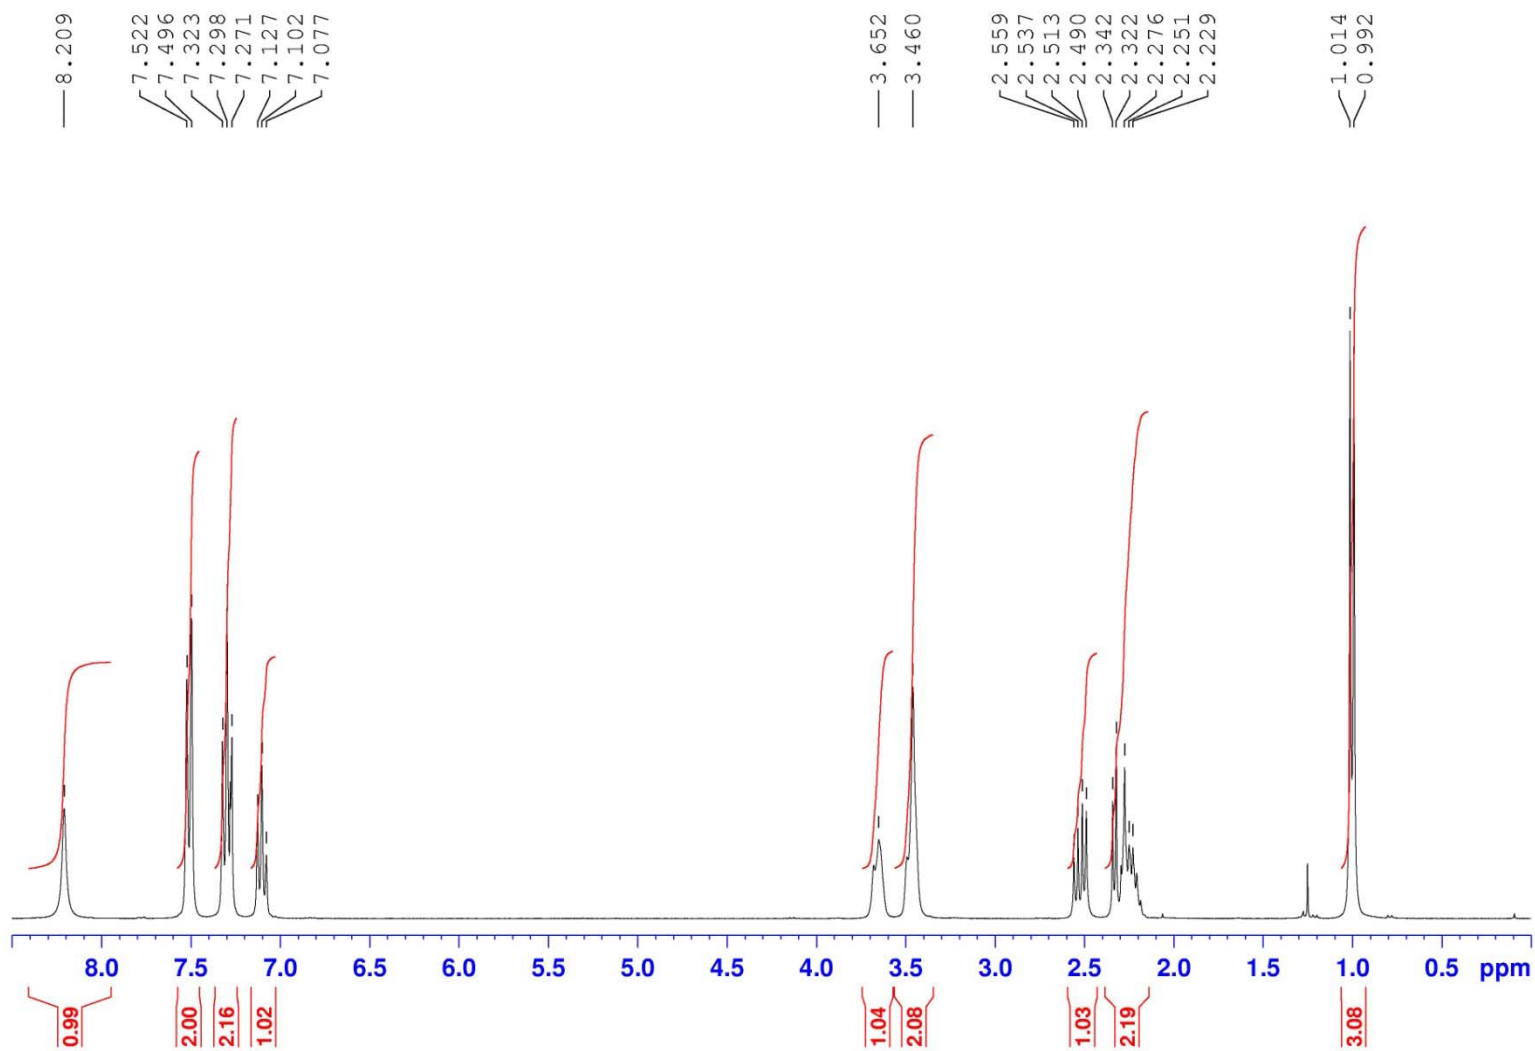



**$^{13}\text{C}$  NMR of (*R*)-4-hydroxy-3-methylbutanoic acid phenyl amide**

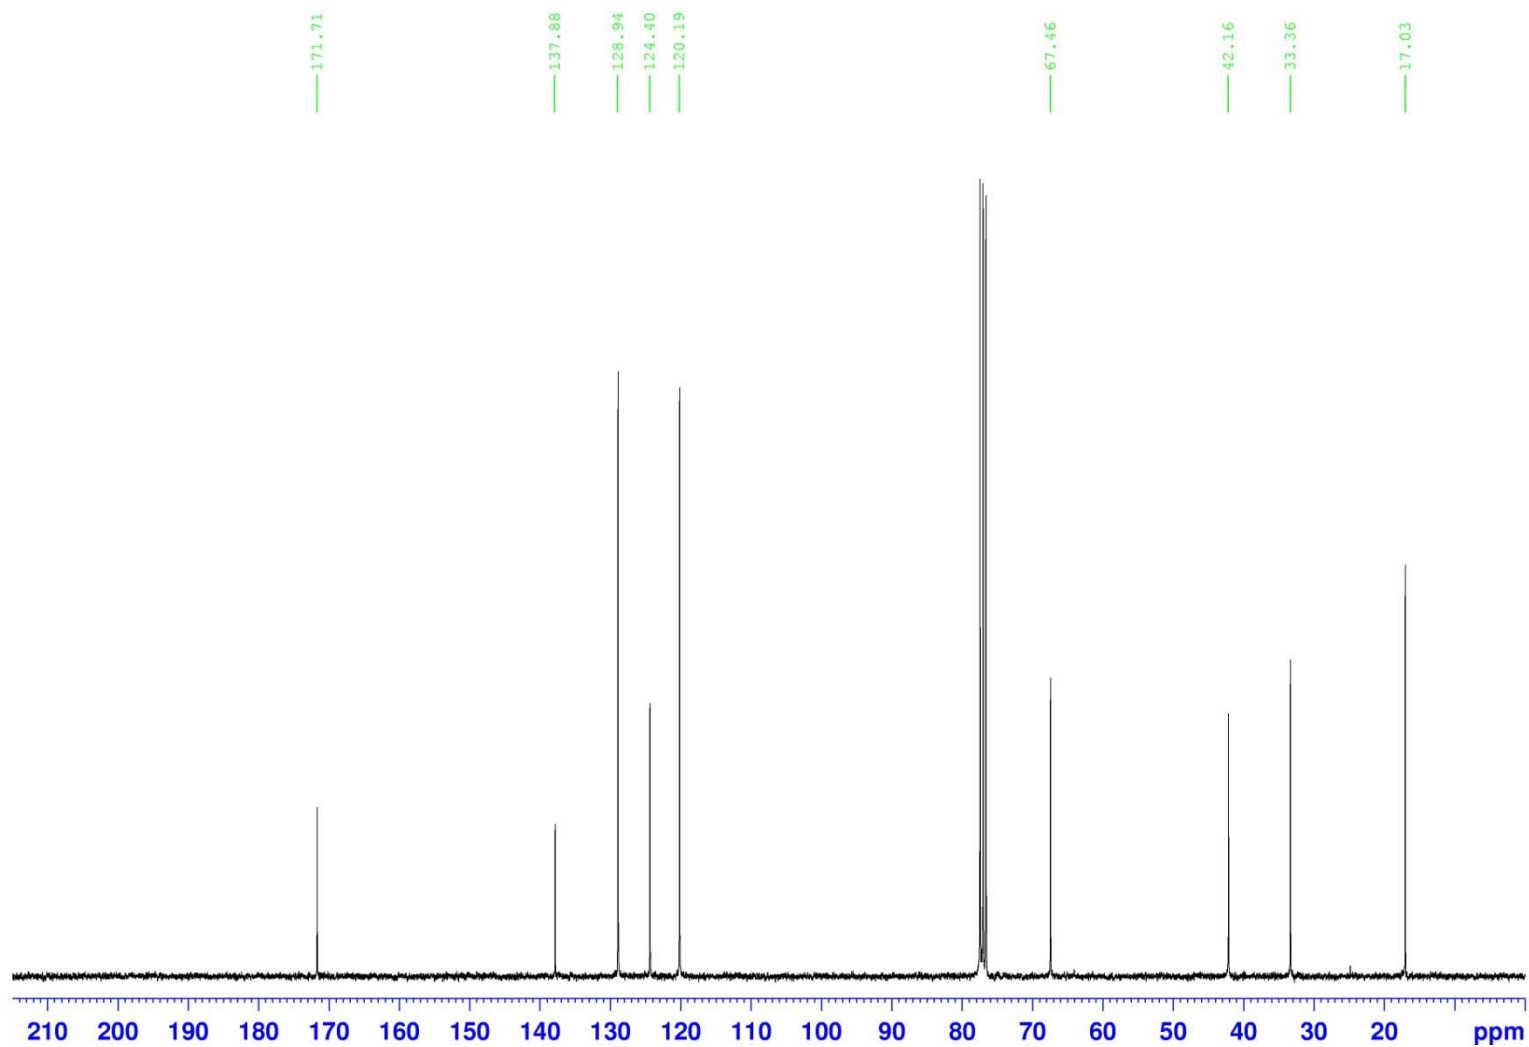

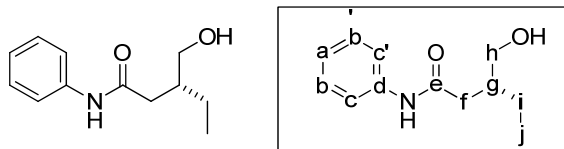

Oxidation of (*R*)-**8b** using the general procedure for small scale oxidation of purified organoboronates with H<sub>2</sub>O<sub>2</sub> affords, after flash chromatography on silica gel (80–40:20–60 hexanes:ethyl acetate), the title compound (98%) as a white solid.

|                                                       |                                                                                                                                                                                                                                                                                                                                                                                                                                    |
|-------------------------------------------------------|------------------------------------------------------------------------------------------------------------------------------------------------------------------------------------------------------------------------------------------------------------------------------------------------------------------------------------------------------------------------------------------------------------------------------------|
| <b>m.p.</b>                                           | 118–119.5 °C                                                                                                                                                                                                                                                                                                                                                                                                                       |
| <b>Optical rotation</b>                               | $[\alpha]_{\text{D}}^{20} = +2.1^{\circ}$ ( <i>c</i> 0.5, CHCl <sub>3</sub> )                                                                                                                                                                                                                                                                                                                                                      |
| <b>HPLC analysis</b>                                  | (Chiralpak-IC, 90:10 hexanes:isopropanol) showed peaks at 40 minutes (4.0% (S)) and 46 minutes (96.0% (R))                                                                                                                                                                                                                                                                                                                         |
| <b>TLC analysis</b>                                   | <i>R<sub>f</sub></i> 0.3 (30:70 hexanes:ethyl acetate)                                                                                                                                                                                                                                                                                                                                                                             |
| <b><sup>1</sup>H NMR (400 MHz, CDCl<sub>3</sub>)</b>  | δ 7.83 (1H, br s, NH), 7.52 (2H, d, <i>J</i> = 7.9 Hz, c,c'), 7.33 (2H, t, <i>J</i> = 7.8 Hz, b,b'), 7.12 (1H, t, <i>J</i> = 7.3 Hz, a), 3.78 (1H, dd, <i>J<sub>1</sub></i> = 10.5 Hz, <i>J<sub>2</sub></i> = 3.0 Hz, h), 3.59 (1H, dd, <i>J<sub>1</sub></i> = 10.5 Hz, <i>J<sub>2</sub></i> = 6.8 Hz, h), 2.87 (1H, br s, OH), 2.55–2.45 (2H, m, f), 2.10–2.00 (1H, g), 1.50–1.35 (2H, m, i), 0.98 (3H, t, <i>J</i> = 7.4 Hz, j). |
| <b><sup>13</sup>C NMR (100 MHz, CDCl<sub>3</sub>)</b> | δ 171.63 (e), 137.83 (d), 128.99 (c,c'), 124.38 (a), 119.99 (b,b'), 65.32 (h), 40.46 (f), 39.75 (g), 24.36 (i), 11.59 (j).                                                                                                                                                                                                                                                                                                         |
| <b>IR (neat)</b>                                      | 3349 (O-H stretch), 3253 (N-H stretch), 2959, 1670 (C=O stretch), 1599, 1551 (N-H bend), 1443, 1319 (C-O stretch), 1255 (C-N stretch), 1143, 1074, 758 cm <sup>-1</sup> .                                                                                                                                                                                                                                                          |
| <b>HRMS (CI)</b>                                      | Calcd. for C <sub>12</sub> H <sub>18</sub> NO <sub>2</sub> (M+H): 208.1338, found 208.1333 <i>m/z</i> .                                                                                                                                                                                                                                                                                                                            |

**<sup>1</sup>H NMR of (*R*)-3-(hydroxymethyl)pentanoic acid phenyl amide**

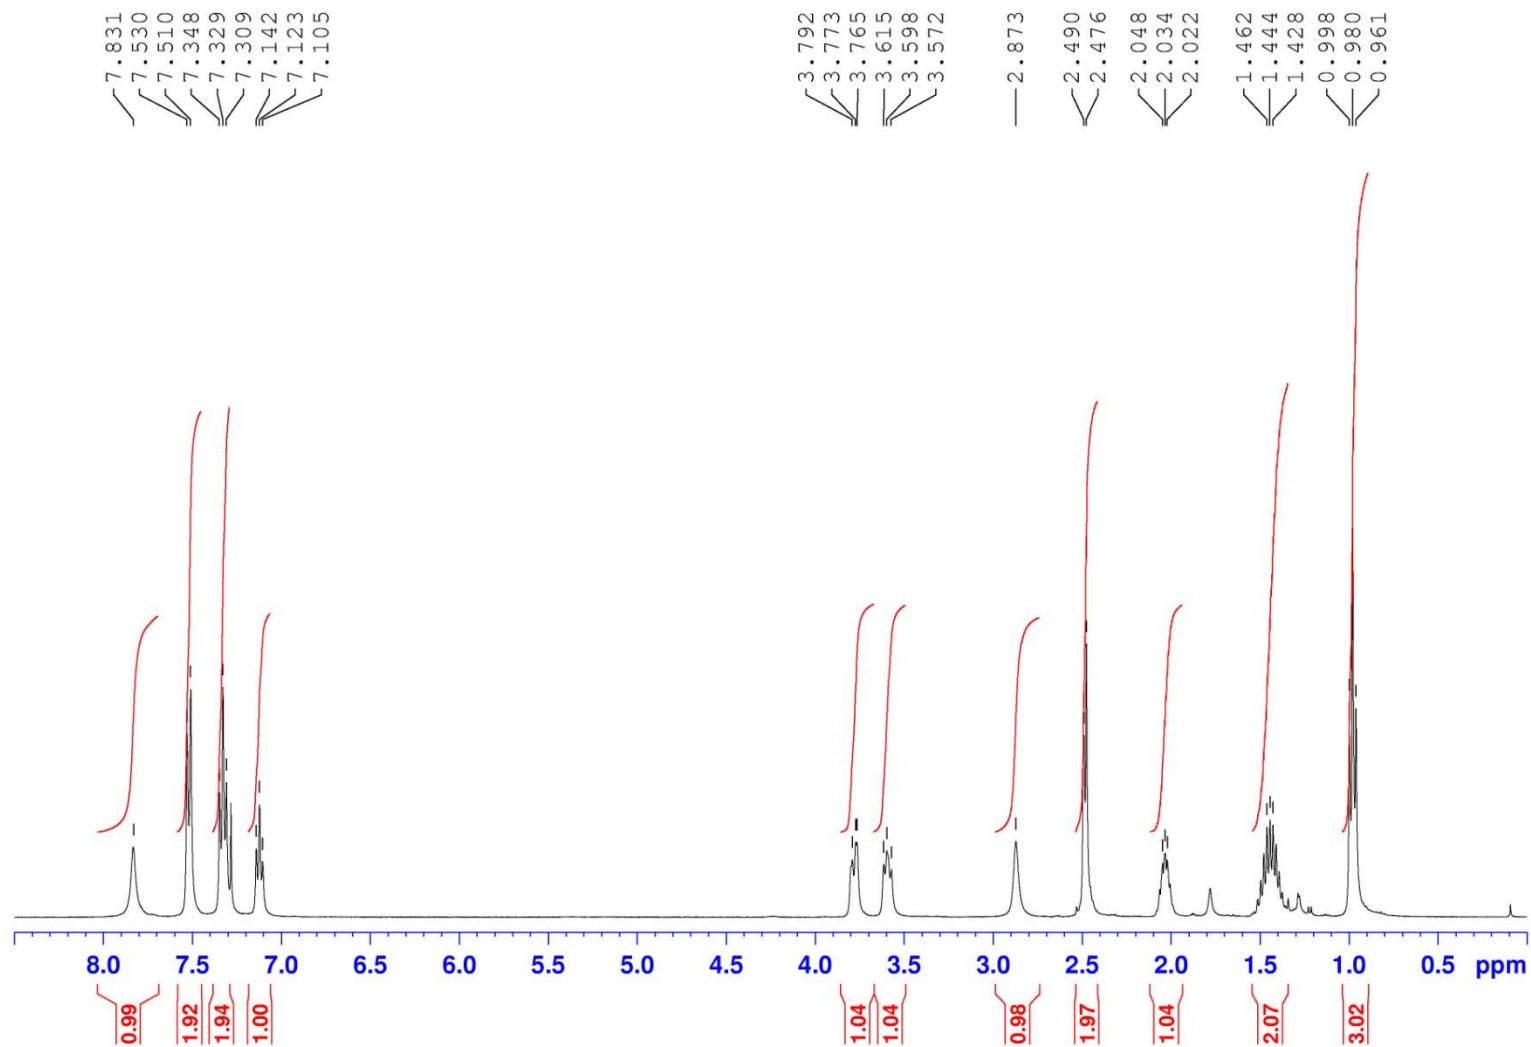

**<sup>13</sup>C NMR of (*R*)-3-(hydroxymethyl)pentanoic acid phenyl amide**

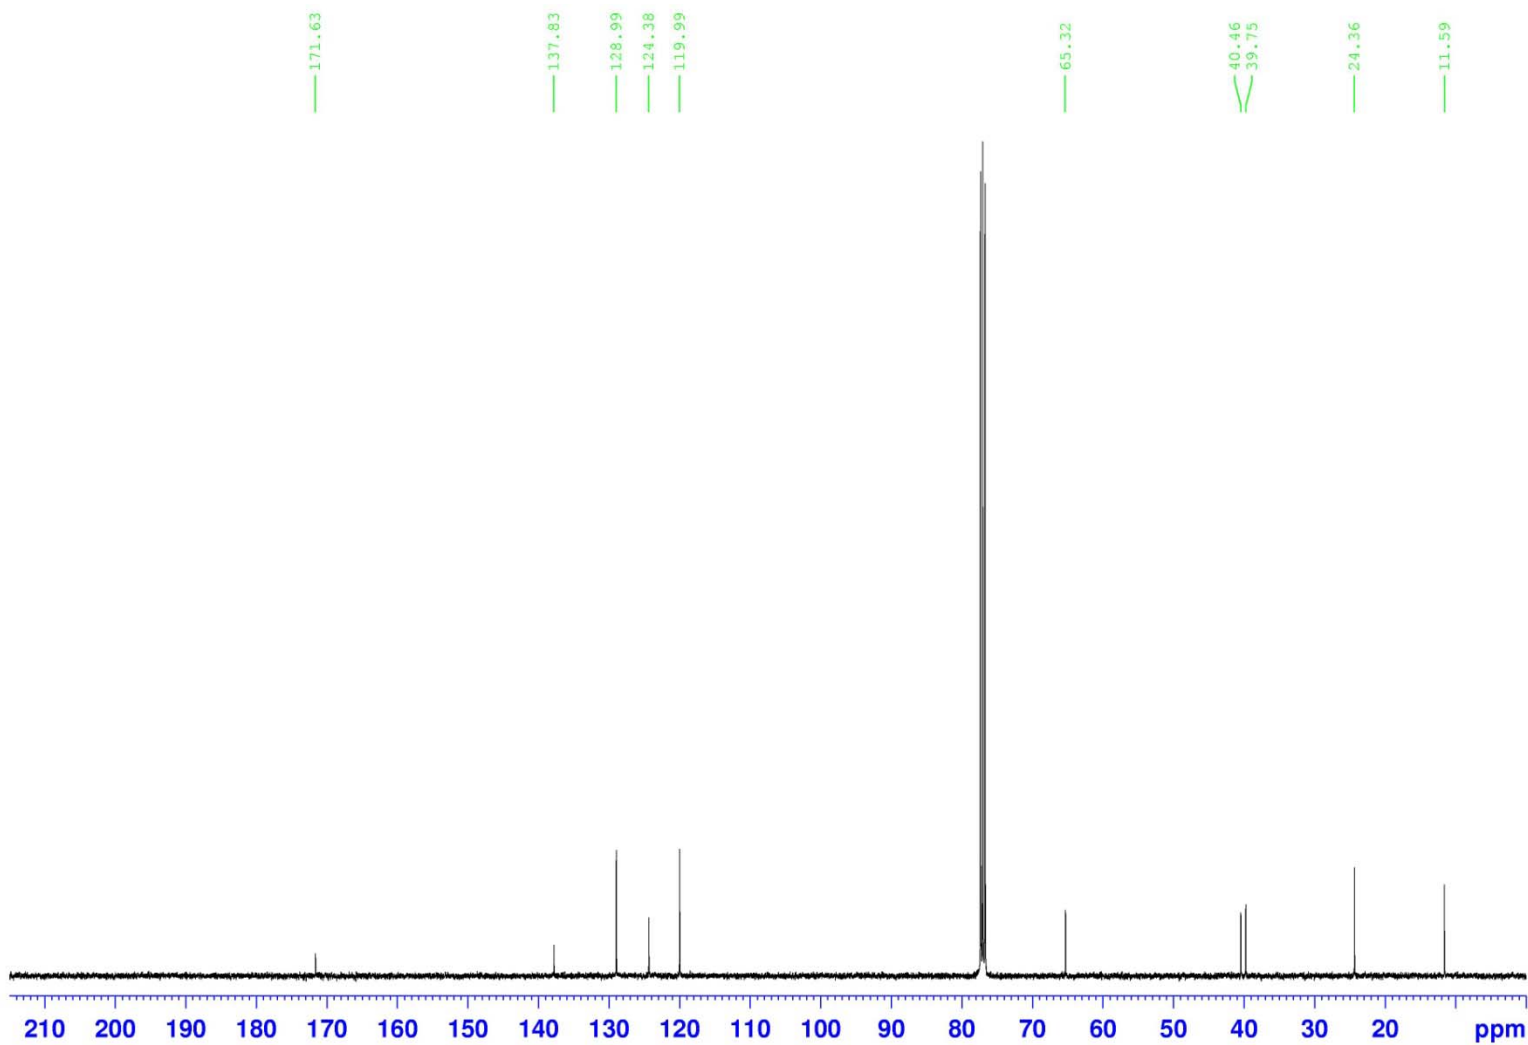

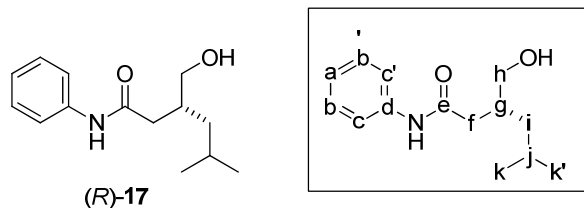

Using the general procedure for CAHB-oxidation of **3** affords, after flash chromatography on silica gel (80–40:20–60 hexanes:ethyl acetate), the title compound (71%) as a white solid.

|                                                      |                                                                                                                                                                                                                                                                                                                                                                                                                   |
|------------------------------------------------------|-------------------------------------------------------------------------------------------------------------------------------------------------------------------------------------------------------------------------------------------------------------------------------------------------------------------------------------------------------------------------------------------------------------------|
| <b>m.p.</b>                                          | 92.5–94 °C                                                                                                                                                                                                                                                                                                                                                                                                        |
| <b>Optical rotation</b>                              | $[\alpha]_{\text{D}}^{20} = +5.1^{\circ}$ ( <i>c</i> 0.5, CHCl <sub>3</sub> )                                                                                                                                                                                                                                                                                                                                     |
| <b>HPLC analysis</b>                                 | (Chiralpak-IC, 90:10 hexanes:isopropanol) showed peaks at 27 minutes (2.5% (S)) and 30 minutes (97.5% (R))                                                                                                                                                                                                                                                                                                        |
| <b>TLC analysis</b>                                  | <i>R<sub>f</sub></i> 0.4 (30:70 hexanes:ethyl acetate)                                                                                                                                                                                                                                                                                                                                                            |
| <b><sup>1</sup>H NMR (300 MHz, CDCl<sub>3</sub>)</b> | δ 7.98 (1H, br s, NH), 7.51 (2H, d, <i>J</i> = 7.8 Hz, c, c'), 7.32 (2H, t, <i>J</i> = 7.6 Hz, b, b'), 7.11 (1H, t, <i>J</i> = 7.4 Hz, a), 3.75 (1H, dd, <i>J</i> = 10.9 and 3.8 Hz, h), 3.52 (1H, dd, <i>J</i> = 10.9 and 6.8 Hz, h), 3.14 (1H, br s, OH), 2.45–2.40 (2H, m, f), 2.30–2.15 (1H, m, g), 1.75–1.60 (1H, m, j), 1.30–1.10 (2H, m, i), 0.92 and 0.91 (6H, overlapping d's, <i>J</i> = 6.5 Hz, k, k') |
| <b><sup>13</sup>C NMR (75 MHz, CDCl<sub>3</sub>)</b> | δ 171.71 (e), 137.85 (d), 128.97 (b, b'), 124.36 (a), 120.06 (c, c'), 65.73 (h), 40.89 (i), 40.72 (f), 35.80 (g), 25.27 (j), 22.78 (k), 22.65 (k').                                                                                                                                                                                                                                                               |
| <b>IR (neat)</b>                                     | 3307 (O-H stretch), 3150 (N-H stretch), 2951, 2925, 2856, 1641 (C=O stretch), 1547 (N-H bend), 1452, 1355 (C-O stretch), 1205 (C-N stretch), 1143, 1077, 1032, 878, 735, 695 cm <sup>-1</sup> .                                                                                                                                                                                                                   |
| <b>HRMS (CI)</b>                                     | Calcd. for C <sub>14</sub> H <sub>22</sub> NO <sub>2</sub> (M+H): 236.1651, found 236.1651 <i>m/z</i> .                                                                                                                                                                                                                                                                                                           |

**<sup>1</sup>H NMR of (R)-17**

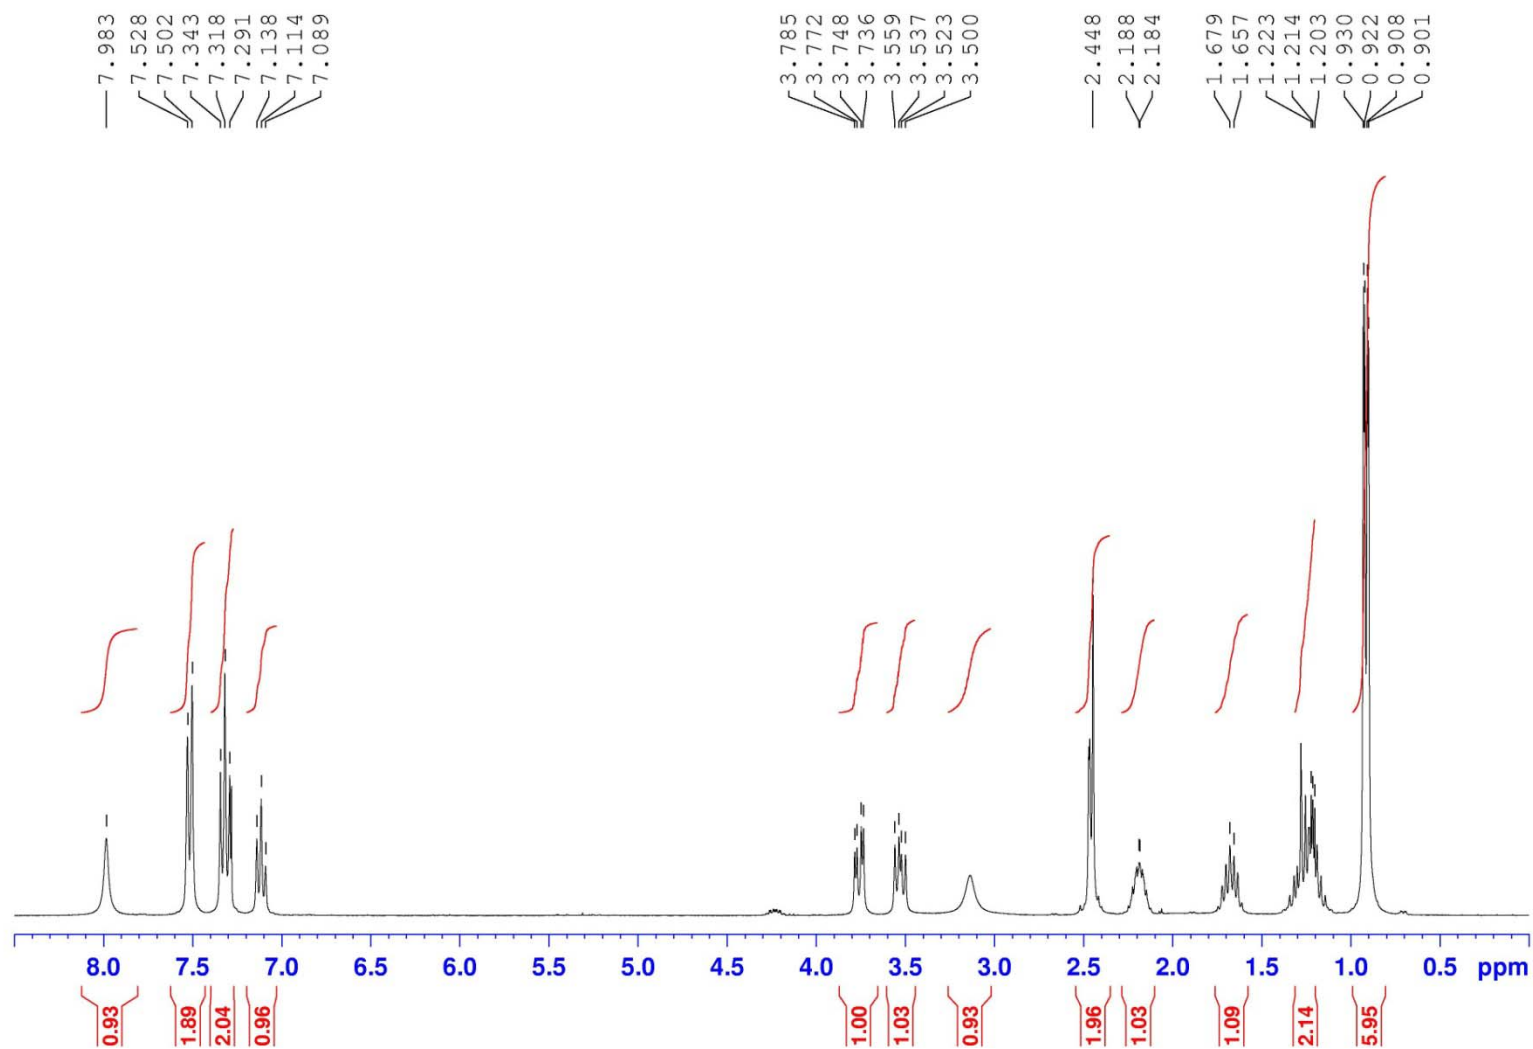

<sup>13</sup>C NMR of (R)-17

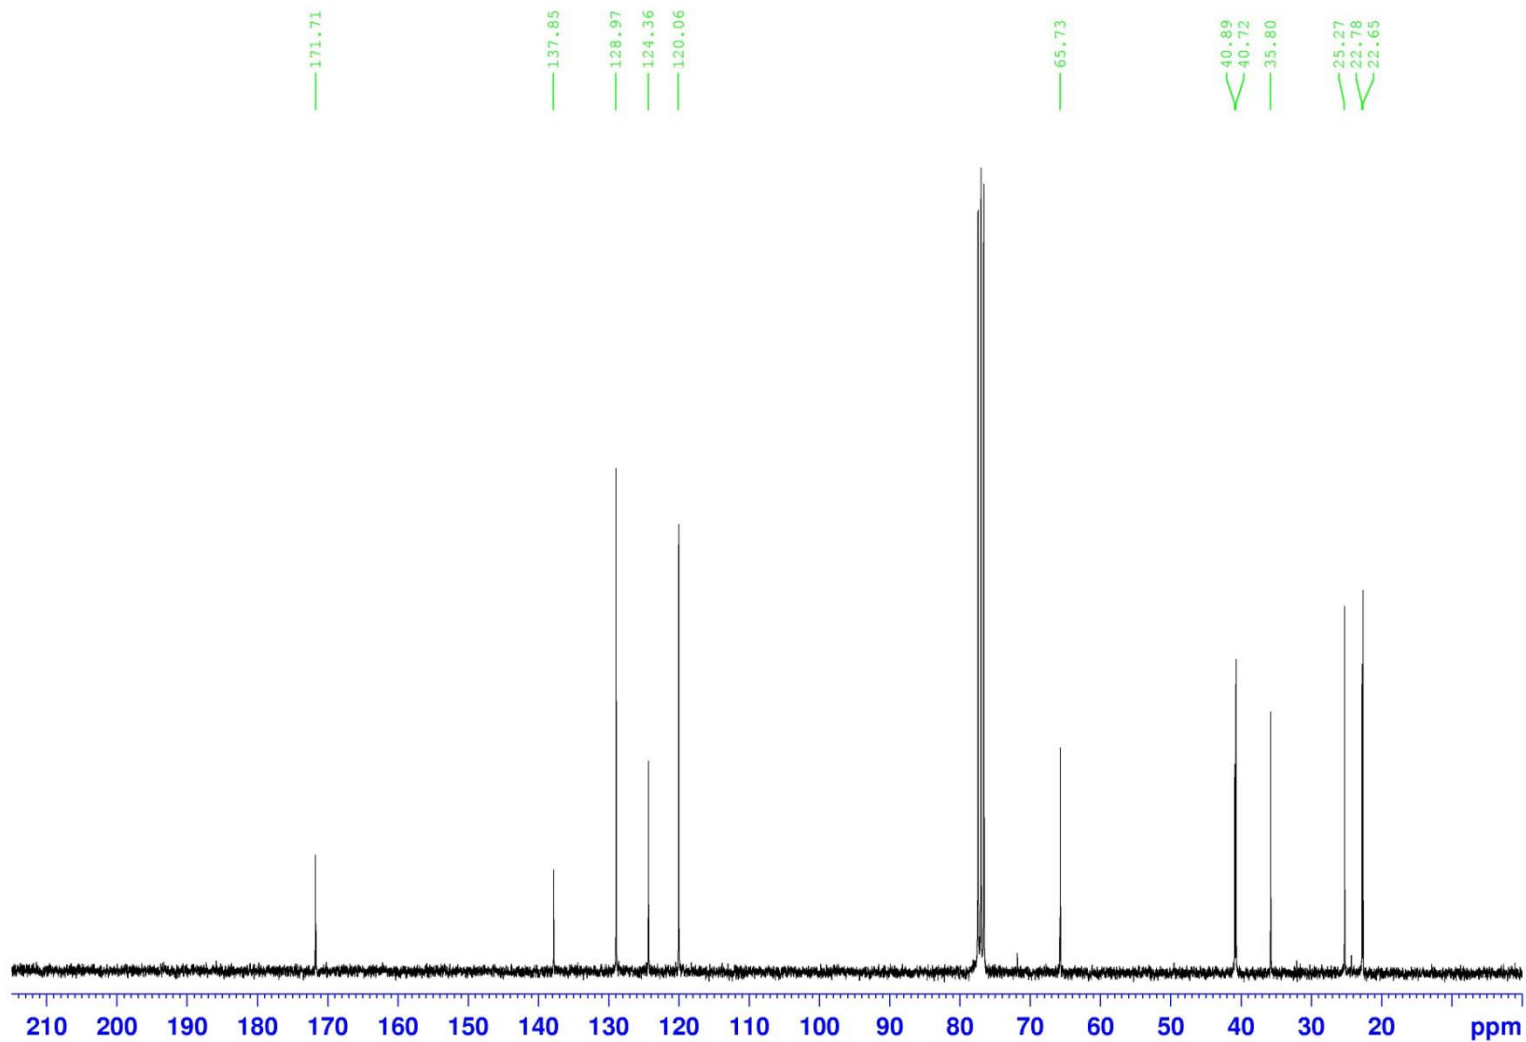

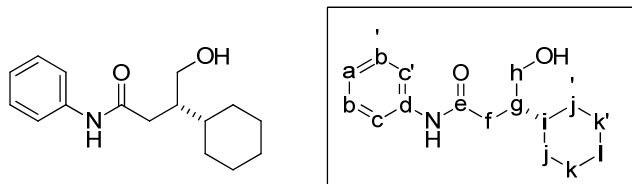

Oxidation of (*S*)-**8e** using the general procedure for small scale oxidation of purified organoboronates with H<sub>2</sub>O<sub>2</sub> affords, after flash chromatography on silica gel (80–40:20–60 hexanes:ethyl acetate), the title compound (96%) as a white solid.

|                                                      |                                                                                                                                                                                                                                                                                                                                                                   |
|------------------------------------------------------|-------------------------------------------------------------------------------------------------------------------------------------------------------------------------------------------------------------------------------------------------------------------------------------------------------------------------------------------------------------------|
| <b>m.p.</b>                                          | 88–89 °C                                                                                                                                                                                                                                                                                                                                                          |
| <b>Optical rotation</b>                              | $[\alpha]_D^{20} = +3.1^\circ$ ( <i>c</i> 0.5, CHCl <sub>3</sub> )                                                                                                                                                                                                                                                                                                |
| <b>HPLC analysis</b>                                 | (Chiralpak-IC, 90:10 hexanes:isopropanol) showed peaks at 48 minutes (5.0% ( <i>S</i> )) and 52 minutes (95.0% ( <i>R</i> ))                                                                                                                                                                                                                                      |
| <b>TLC analysis</b>                                  | <i>R<sub>f</sub></i> 0.4 (30:70 hexanes:ethyl acetate)                                                                                                                                                                                                                                                                                                            |
| <b><sup>1</sup>H NMR (300 MHz, CDCl<sub>3</sub>)</b> | δ 7.90 (1H, br s, NH), 7.52 (2H, d, <i>J</i> = 7.9 Hz, c,c'), 7.33 (2H, t, <i>J</i> = 7.9 Hz, b,b'), 7.12 (1H, t, <i>J</i> = 7.2 Hz, a), 3.82 (1H, dd, <i>J</i> = 10.8 and 4.0 Hz, h), 3.67 (1H, dd, <i>J</i> = 10.8 and 7.1 Hz, h), 2.51 (2H, d, <i>J</i> = 6.2 Hz, f), 2.00–1.80 (1H, m, g), 1.80–1.60 (5H, m, j,j',k,k',OH), 1.35–1.00 (7H, m, i,j,j',k,k',l). |
| <b><sup>13</sup>C NMR (75 MHz, CDCl<sub>3</sub>)</b> | δ 172.23 (e), 137.94 (d), 128.97 (c,c'), 124.27 (a), 119.92 (b,b'), 64.38 (h), 49.20 (g), 43.41 (f), 39.54 (i), 38.64 (j), 33.93 (j'), 30.36 (l), 26.55 (k), 26.48 (k').                                                                                                                                                                                          |
| <b>IR (neat)</b>                                     | 3292 (O-H stretch), 3100 (N-H stretch), 2957, 2893, 1655 (C=O stretch), 1599, 1540 (N-H bend), 1444, 1327 (C-O stretch), 1268 (C-N stretch), 1121, 1053, 881, 753 cm <sup>-1</sup> .                                                                                                                                                                              |
| <b>HRMS (CI)</b>                                     | Calcd. for C <sub>16</sub> H <sub>24</sub> NO <sub>2</sub> (M+H): 262.1807, found 262.1808 <i>m/z</i> .                                                                                                                                                                                                                                                           |



**<sup>1</sup>H NMR of (S)-3-cyclohexyl-4-hydroxybutanoic acid phenyl amide**

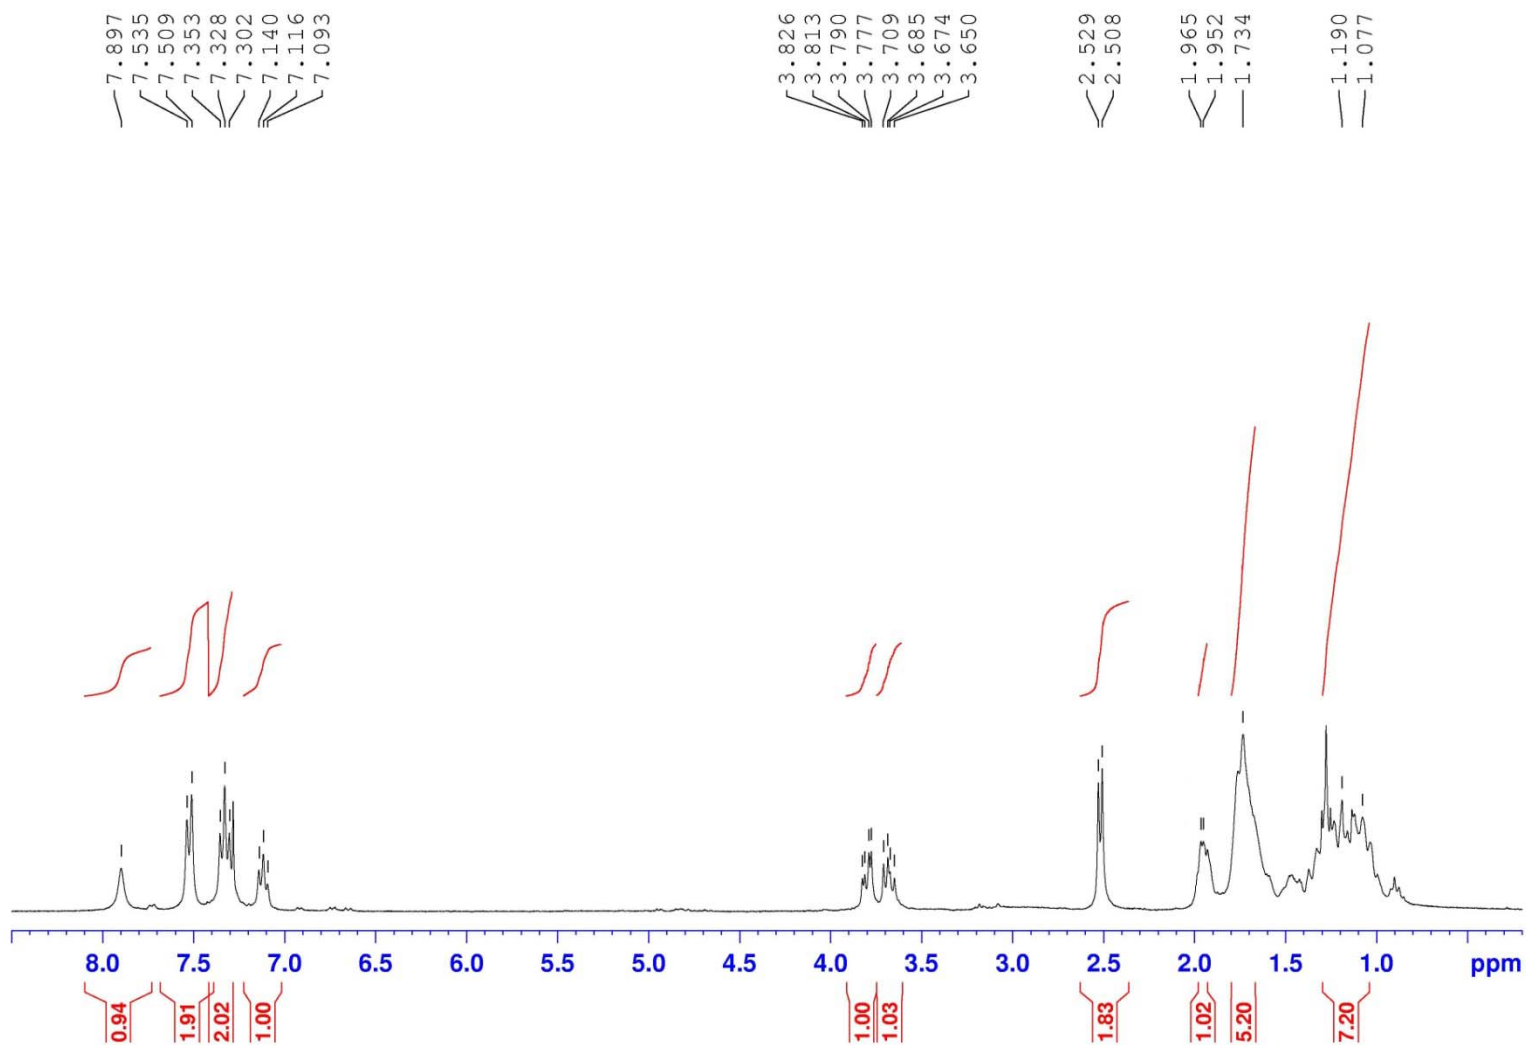

**<sup>13</sup>C NMR of (*S*)-3-cyclohexyl-4-hydroxybutanoic acid phenyl amide**

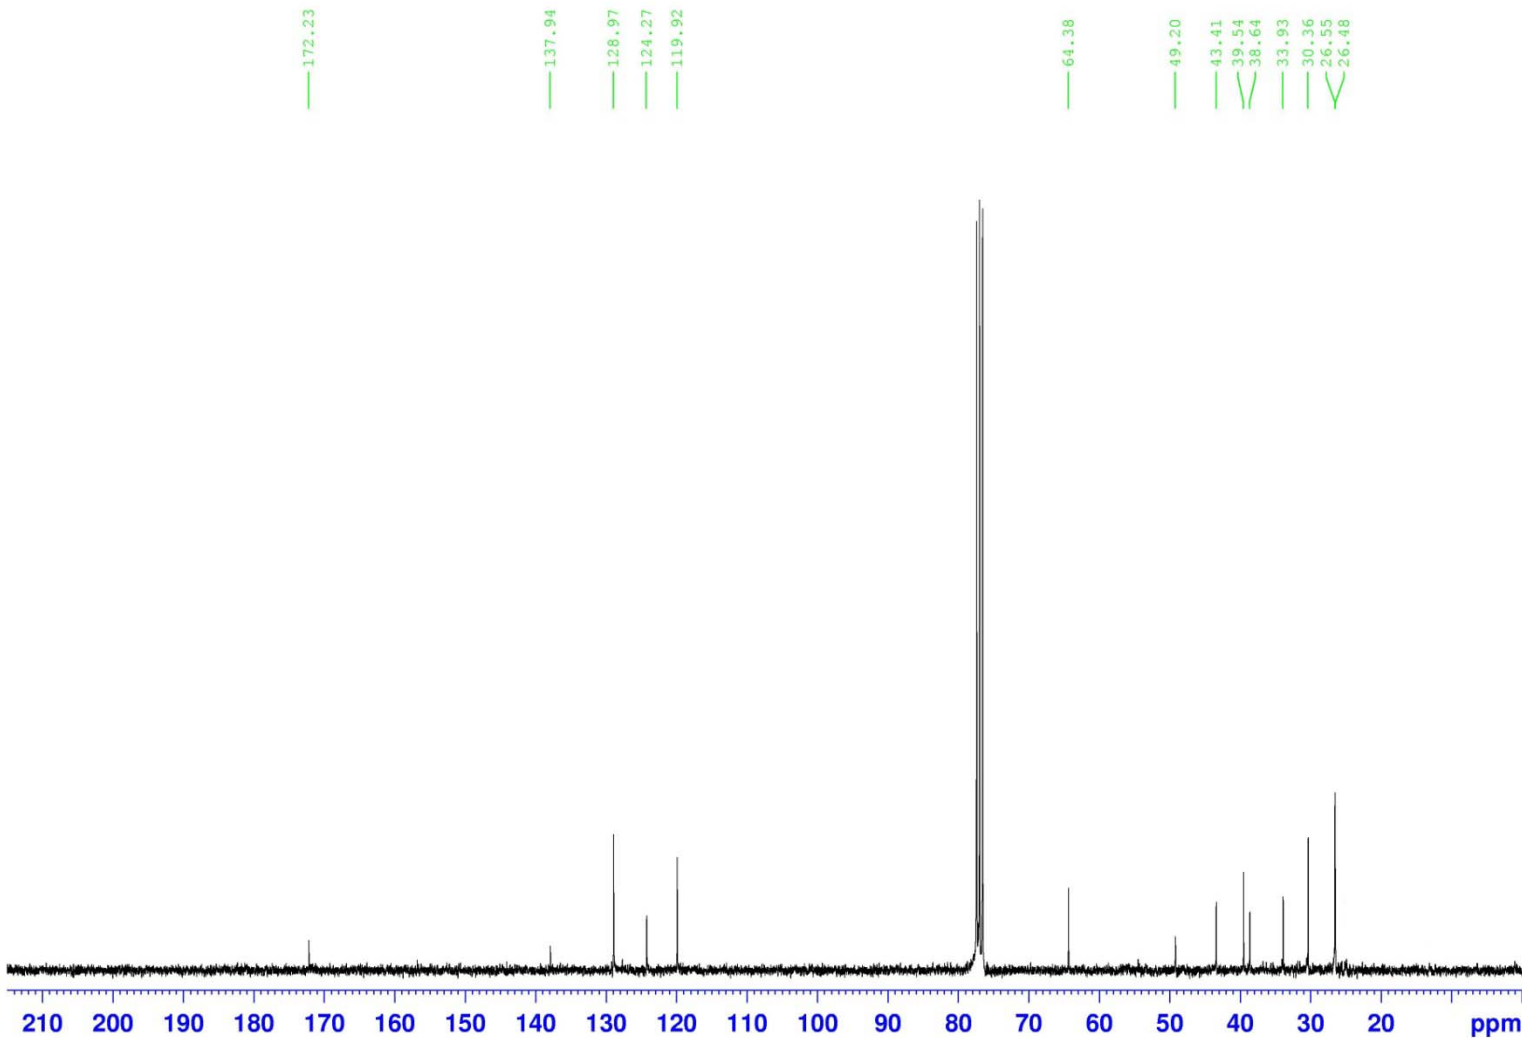

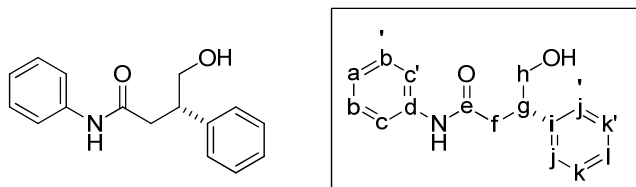

Oxidation of (*S*)-**8f** using the general procedure for small scale oxidation of purified organoboronates with H<sub>2</sub>O<sub>2</sub> affords, after flash chromatography on silica gel (80–40:20–60 hexanes:ethyl acetate), the title compound (98%) as a white solid.

|                                                               |                                                                                                                                                                                                                                                                                                                                                    |
|---------------------------------------------------------------|----------------------------------------------------------------------------------------------------------------------------------------------------------------------------------------------------------------------------------------------------------------------------------------------------------------------------------------------------|
| <b>m.p.</b>                                                   | 95.5–97 °C                                                                                                                                                                                                                                                                                                                                         |
| <b>Optical rotation</b>                                       | $[\alpha]_{\text{D}}^{20} = +3.8^{\circ}$ ( <i>c</i> 0.5, CHCl <sub>3</sub> )                                                                                                                                                                                                                                                                      |
| <b>HPLC analysis</b>                                          | (Chiralpak-IC, 90:10 hexanes:isopropanol) showed peaks at 56 minutes (3.5% ( <i>S</i> )) and 85 minutes (96.5% ( <i>R</i> ))                                                                                                                                                                                                                       |
| <b>TLC analysis</b>                                           | 0.4 (30:70 hexanes:ethyl acetate)                                                                                                                                                                                                                                                                                                                  |
| <b><sup>1</sup>H NMR (300 MHz, DMSO-<i>d</i><sub>6</sub>)</b> | δ 9.86 (1H, br s, NH), 7.51 (2H, d, <i>J</i> = 8.0 Hz, c,c'), 7.30–7.10 (7H, m, b,b',j,j',k,k',l), 6.98 (1H, t, <i>J</i> = 7.3 Hz, a), 4.79 (1H, t, <i>J</i> = 5.2 Hz, OH), 3.65–3.50 (2H, m, h), 3.35–3.20 (1H, m, g), 2.82 and 2.60 (2H, overlapping dd's, <i>J</i> <sub>1</sub> = 14.8 Hz, 5.9 Hz, <i>J</i> <sub>2</sub> = 14.8 Hz, 8.9 Hz, f). |
| <b><sup>13</sup>C NMR (75 MHz, DMSO-<i>d</i><sub>6</sub>)</b> | δ 170.55 (e), 143.16 (d), 139.67 (i), 129.06 (j,j'), 128.55 (b,b'), 128.32 (k,k'), 126.64 (l), 123.40 (a), 119.45 (c,c'), 65.84 (h), 44.92(f).                                                                                                                                                                                                     |
| <b>IR (neat)</b>                                              | 3365 (O-H stretch), 3254, 3191 (N-H stretch), 1667 (C=O stretch), 1607, 1597, 1550 (N-H bend), 1498, 1443, 1316 (C-O stretch), 1254 (C-N stretch), 1189, 1132, 960, 852, 756 cm <sup>-1</sup> .                                                                                                                                                    |
| <b>HRMS (FAB)</b>                                             | Calcd. for C <sub>16</sub> H <sub>18</sub> NO <sub>2</sub> (M+H): 256.1338, found 256.1337 <i>m/z</i> .                                                                                                                                                                                                                                            |

**<sup>1</sup>H NMR of (S)-4-hydroxy-3-phenylbutanoic acid phenyl amide**

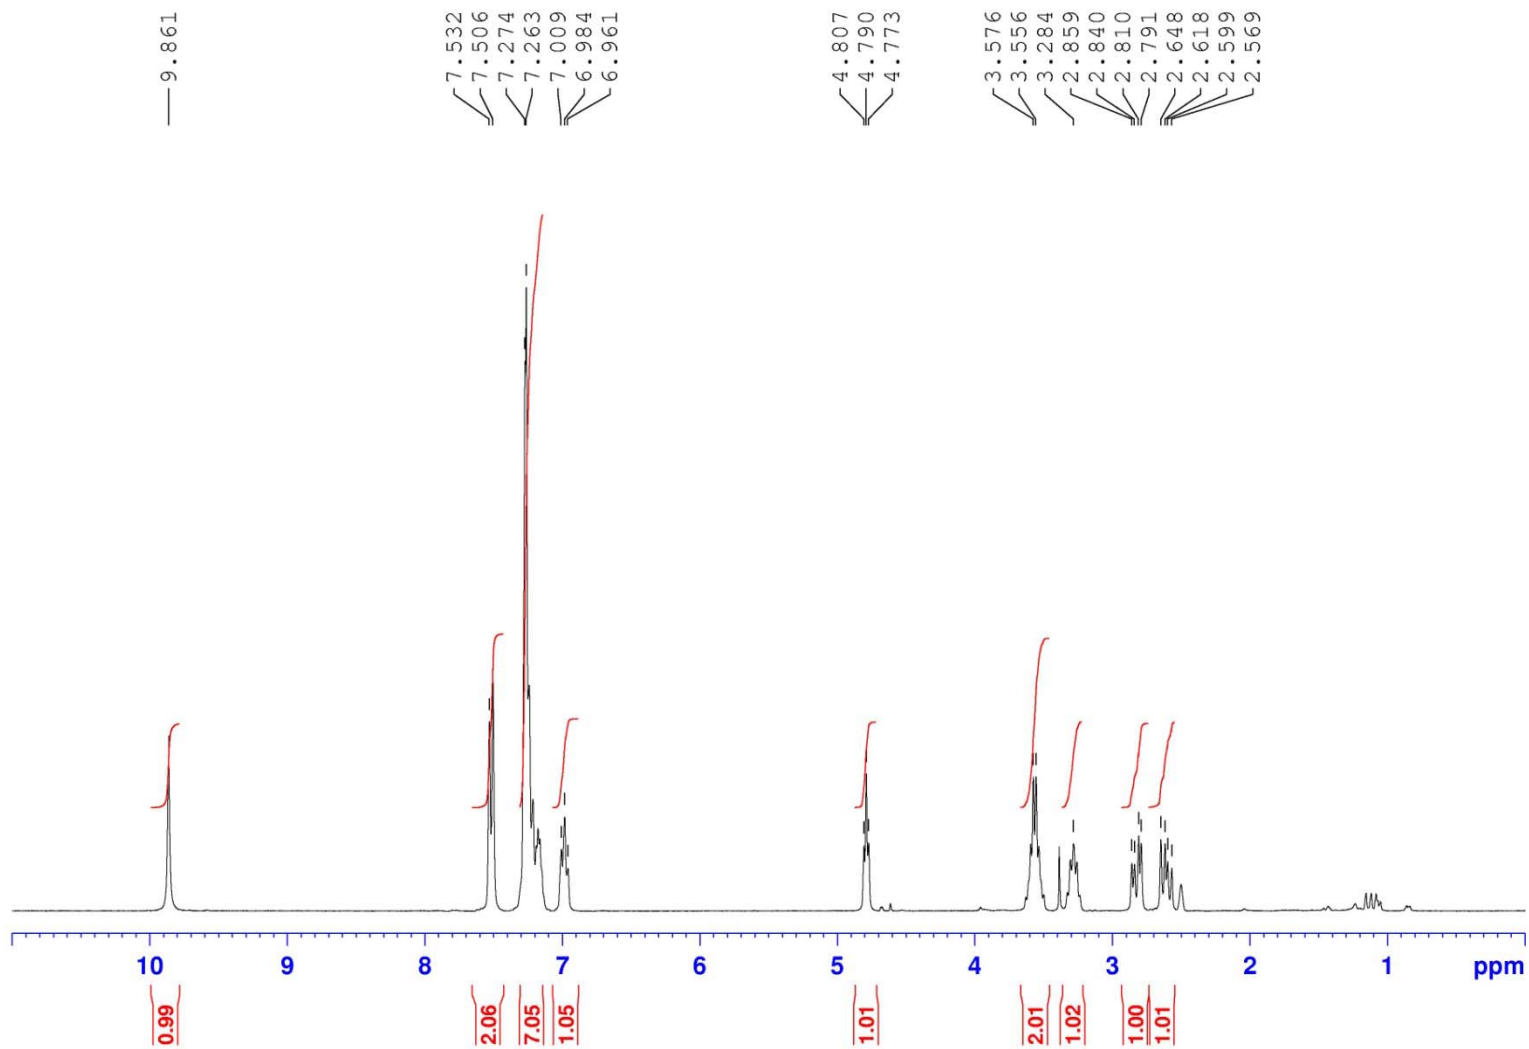

**$^{13}\text{C}$  NMR of (*S*)-4-hydroxy-3-phenylbutanoic acid phenyl amide**

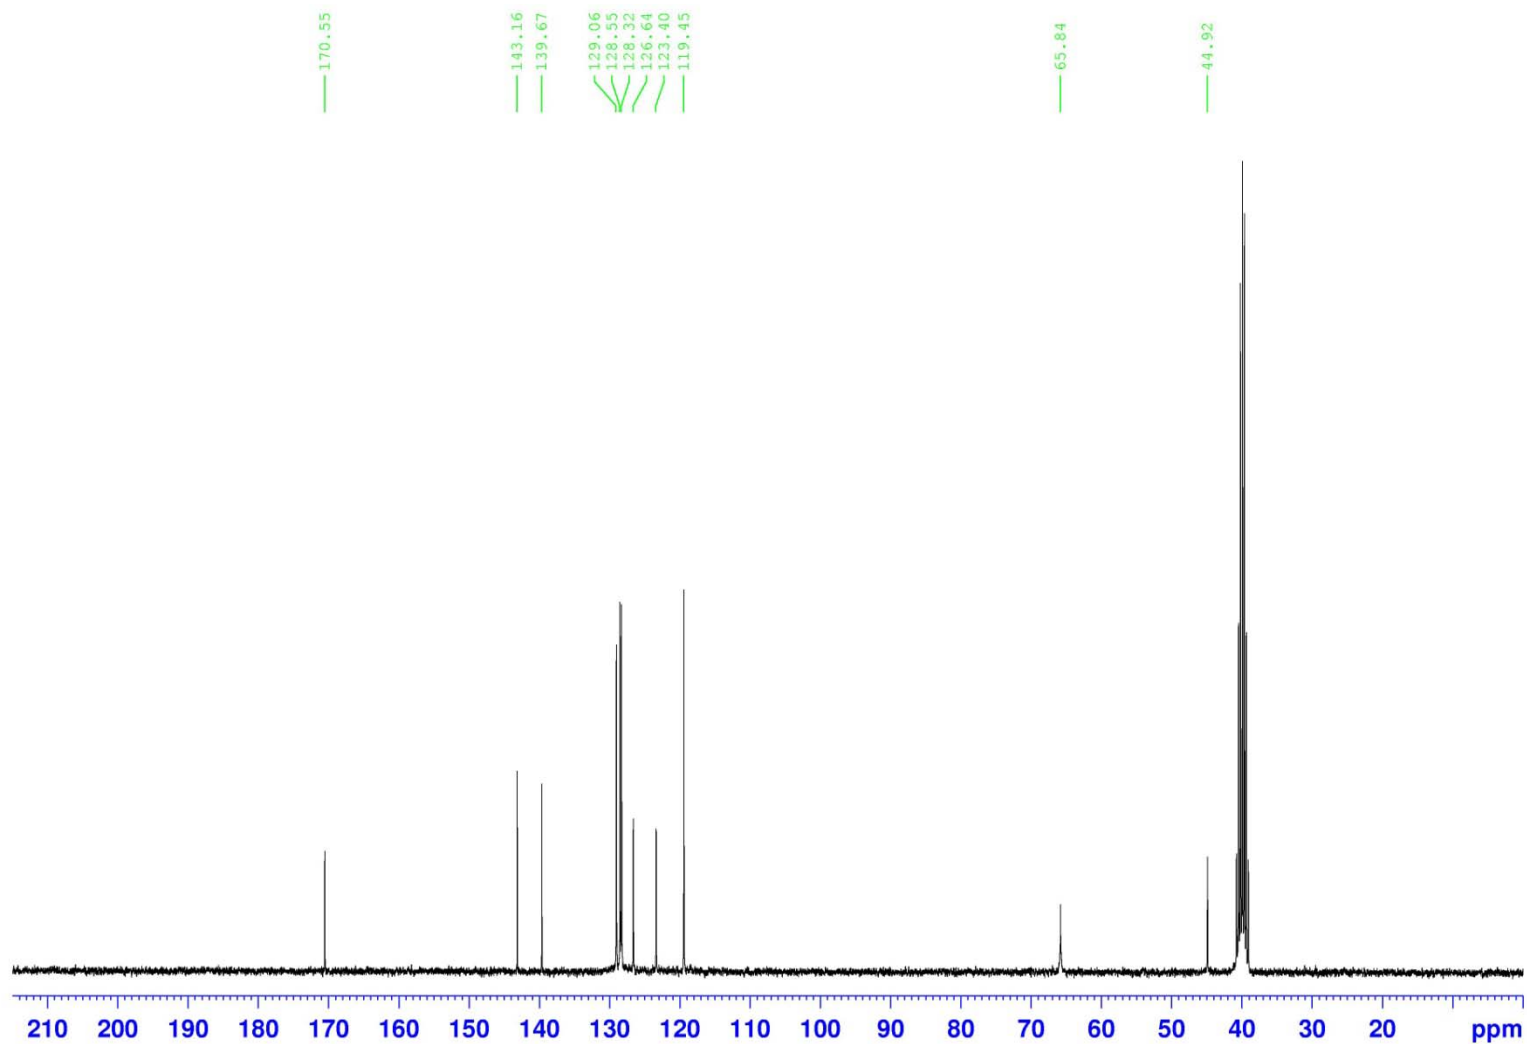

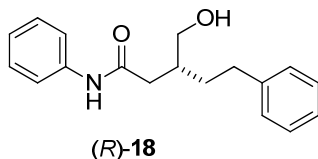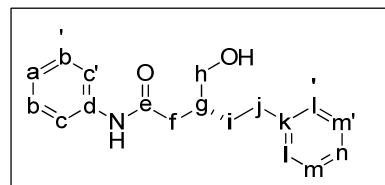

Using the general procedure for CAHB-oxidation of **7c** affords, after flash chromatography on silica gel (80–40:20–60 hexanes:ethyl acetate), the title compound (71%) as a white solid.

|                                                       |                                                                                                                                                                                                                                                                                                                     |
|-------------------------------------------------------|---------------------------------------------------------------------------------------------------------------------------------------------------------------------------------------------------------------------------------------------------------------------------------------------------------------------|
| <b>m.p.</b>                                           | 92–94 °C                                                                                                                                                                                                                                                                                                            |
| <b>Optical rotation</b>                               | $[\alpha]_D^{20} = +4.3^\circ$ ( <i>c</i> 0.5, CHCl <sub>3</sub> )                                                                                                                                                                                                                                                  |
| <b>HPLC analysis</b>                                  | (Chiralpak-IC, 85:15 hexanes:isopropanol) showed peaks at 23 minutes (3.0% (S)) and 26 minutes (97.0% (R))                                                                                                                                                                                                          |
| <b>TLC analysis</b>                                   | <i>R<sub>f</sub></i> 0.4 (30:70 hexanes:ethyl acetate)                                                                                                                                                                                                                                                              |
| <b><sup>1</sup>H NMR (400 MHz, CDCl<sub>3</sub>)</b>  | δ 7.75 (1H, br s, NH), 7.50 (2H, d, <i>J</i> = 7.8 Hz, c,c'), 7.35–7.25 (4H, m, b,b',l,l'), 7.25–7.15 (3H, m, m,m',n), 7.13 (1H, t, <i>J</i> = 7.4 Hz, a), 3.85–3.75 (1H, m, h), 3.70–3.60 (1H, m, h), 2.92 (1H, br s, OH), 2.80–2.65 (2H, m, j), 2.55–2.45 (2H, m, f), 2.20–2.10 (1H, m, g), 1.80–1.65 (2H, m, i). |
| <b><sup>13</sup>C NMR (100 MHz, CDCl<sub>3</sub>)</b> | δ 171.32 (e), 141.89 (k), 137.75 (d), 129.01 (l,l'), 128.48 (b,b'), 128.37 (m,m'), 125.98 (n), 124.44 (a), 120.02 (c,c'), 65.36 (h), 40.60 (f), 37.77 (j), 33.41 (g), 33.11 (i).                                                                                                                                    |
| <b>IR (neat)</b>                                      | 3679 (O-H stretch), 3150 (N-H stretch), 2993, 2950, 1678 (C=O stretch), 1598, 1498 (N-H bend), 1443, 1322 (C-O stretch), 1304, 1197 (C-N stretch), 1174, 1095, 957, 762 cm <sup>-1</sup> .                                                                                                                          |
| <b>HRMS (CI)</b>                                      | Calcd. for C <sub>18</sub> H <sub>22</sub> NO <sub>2</sub> (M+H): 284.1651, found 284.1656 <i>m/z</i> .                                                                                                                                                                                                             |

**<sup>1</sup>H NMR of (*R*)-18**

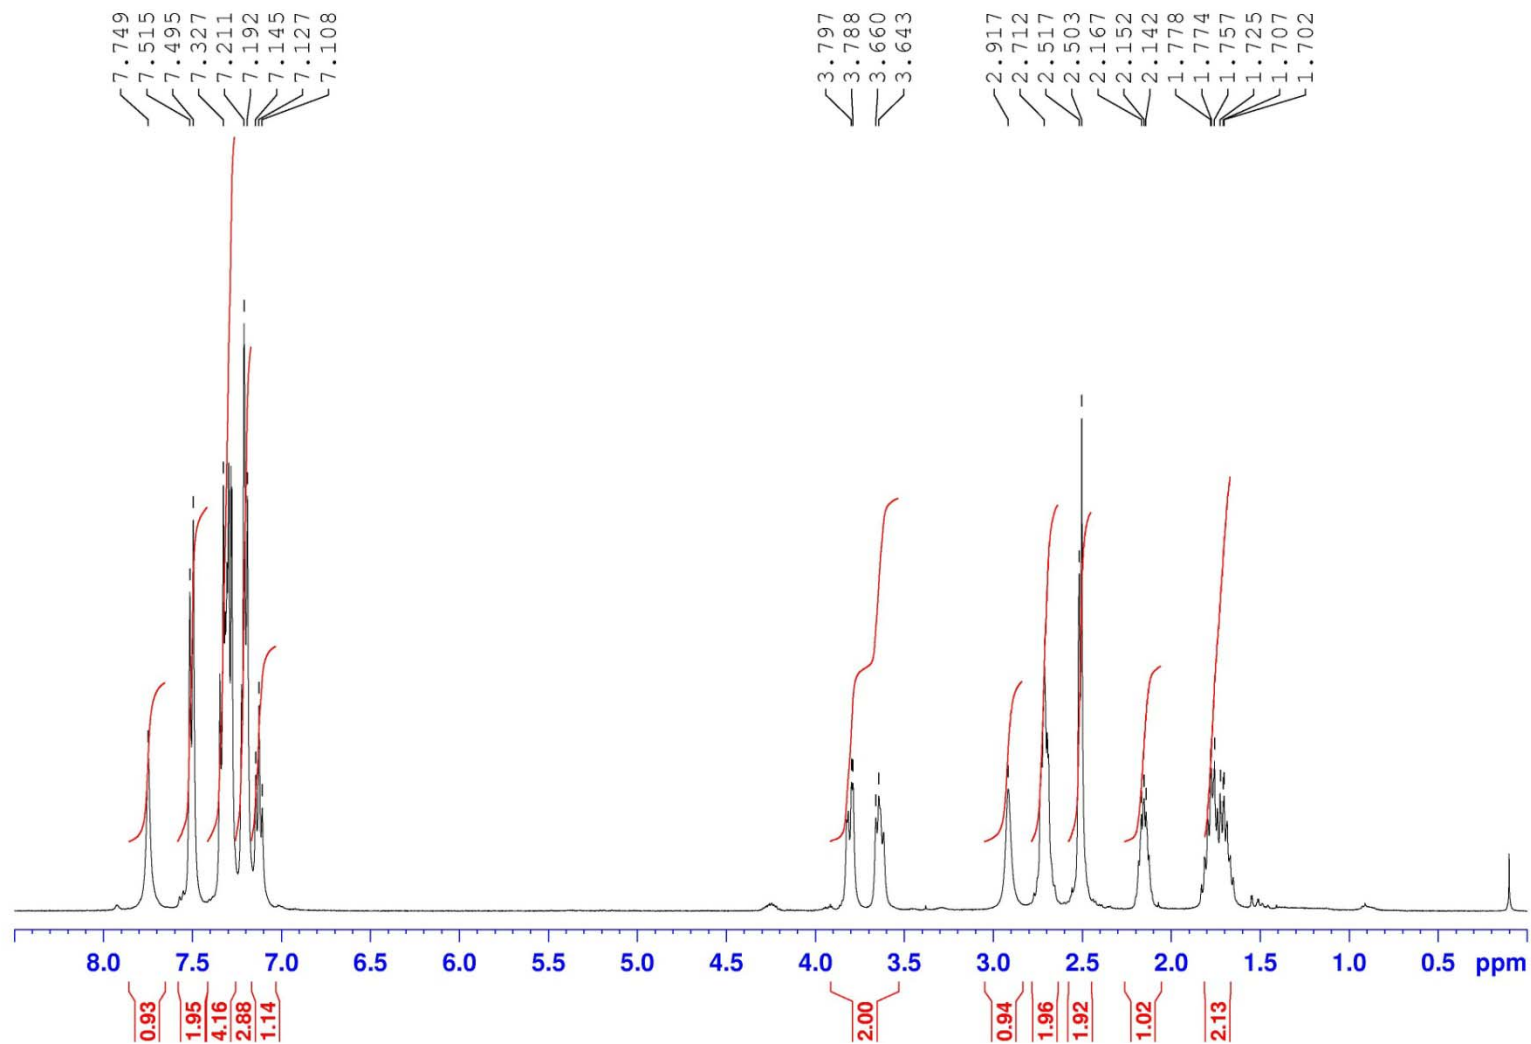

**<sup>13</sup>C NMR of (*R*)-18**

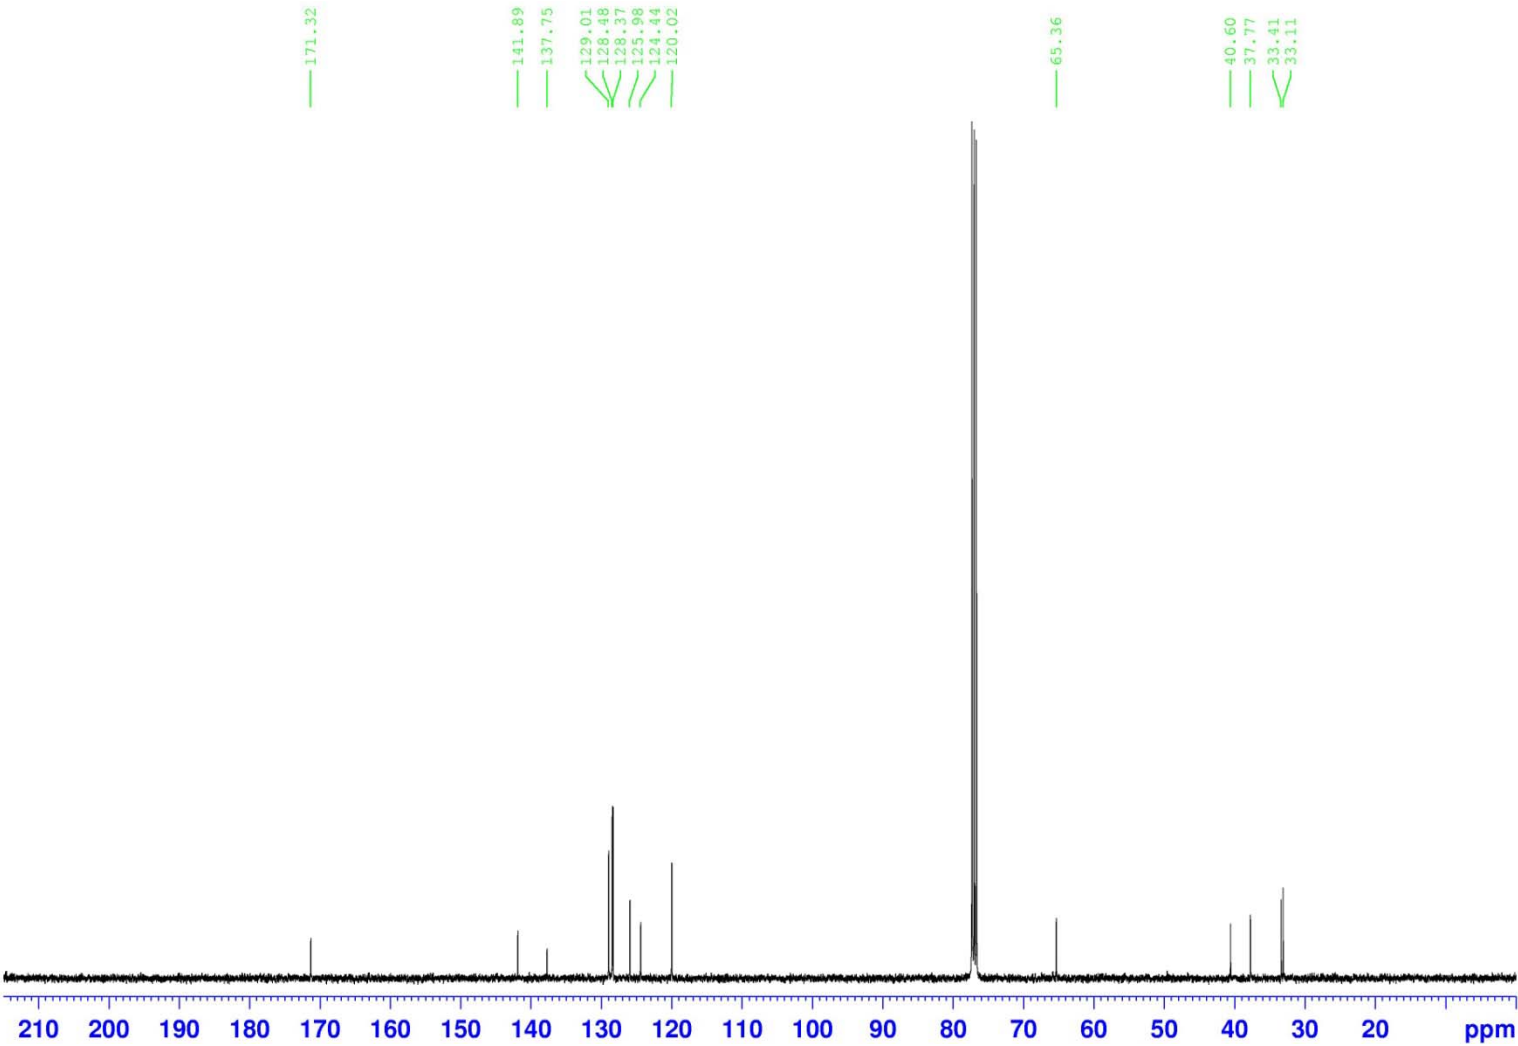



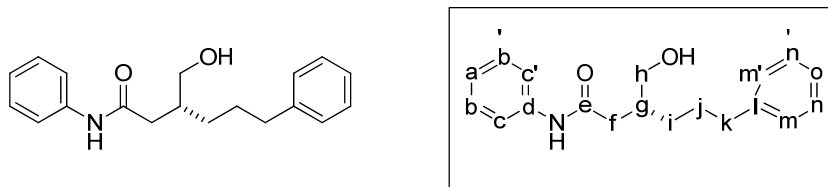

Following Oxidation of (*R*)-**8d** using the general procedure for small scale oxidation of purified organoboronates with H<sub>2</sub>O<sub>2</sub> affords, after flash chromatography on silica gel (80–40:20–60 hexanes:ethyl acetate), the title compound (98%) as a white solid.

|                                                      |                                                                                                                                                                                                                                                                                                                                                                                                        |
|------------------------------------------------------|--------------------------------------------------------------------------------------------------------------------------------------------------------------------------------------------------------------------------------------------------------------------------------------------------------------------------------------------------------------------------------------------------------|
| <b>m.p.</b>                                          | 78.5–80 °C                                                                                                                                                                                                                                                                                                                                                                                             |
| <b>Optical rotation</b>                              | $[\alpha]_{\text{D}}^{20} = +4.1^{\circ}$ ( <i>c</i> 0.5, CHCl <sub>3</sub> )                                                                                                                                                                                                                                                                                                                          |
| <b>HPLC analysis</b>                                 | (Chiralpak-IC, 90:10 hexanes:isopropanol) showed peaks at 35 minutes (4.0% (S)) and 37 minutes (96.0% (R))                                                                                                                                                                                                                                                                                             |
| <b>TLC analysis</b>                                  | <i>R<sub>f</sub></i> 0.5 (30:70 hexanes:ethyl acetate)                                                                                                                                                                                                                                                                                                                                                 |
| <b><sup>1</sup>H NMR (300 MHz, CDCl<sub>3</sub>)</b> | δ 7.58 (1H, br s, NH), 7.50 (2H, d, <i>J</i> = 7.9 Hz, m,m'), 7.40–7.30 (2H, m, c,c'), 7.30–7.25 (2H, m, b,b'), 7.25–7.15 (3H, m, n,n',o), 7.13 (1H, t, <i>J</i> = 7.5 Hz, a), 3.77 (1H, dd, <i>J</i> = 10.9 and 4.0 Hz, h), 3.58 (1H, dd, <i>J</i> = 10.9 and 6.7 Hz, h), 2.64 (2H, t, <i>J</i> = 7.3 Hz, k), 2.50–2.40 (2H, m, f), 2.20–2.10 (1H, m, g), 1.80–1.60 (2H, m, i), 1.60–1.40 (2H, m, j). |
| <b><sup>13</sup>C NMR (75 MHz, CDCl<sub>3</sub>)</b> | δ 171.29 (e), 142.18 (d), 137.73 (l), 129.00 (b,b'), 128.39 (m,m'), 128.34 (n,n'), 125.81 (o), 124.41 (a), 119.96 (c,c'), 65.53 (h), 40.65 (f), 38.02 (g), 35.96 (k), 31.06 (i), 28.95 (j).                                                                                                                                                                                                            |
| <b>IR (neat)</b>                                     | 3714 (O-H stretch), 3040 (N-H stretch), 2890, 1680 (C=O stretch), 1601, 1590, 1545 (N-H bend), 1499, 1451, 1369, 1308 (C-O stretch), 1204 (C-N stretch), 1186, 1100, 1020, 990, 756 cm <sup>-1</sup> .                                                                                                                                                                                                 |
| <b>HRMS (CI)</b>                                     | Calcd. for C <sub>19</sub> H <sub>24</sub> NO <sub>2</sub> (M+H): 298.1807, found 298.1800 <i>m/z</i> .                                                                                                                                                                                                                                                                                                |

**<sup>1</sup>H NMR of (*R*)-3-(hydroxymethyl)-6-phenylhexanoic acid phenyl amide**

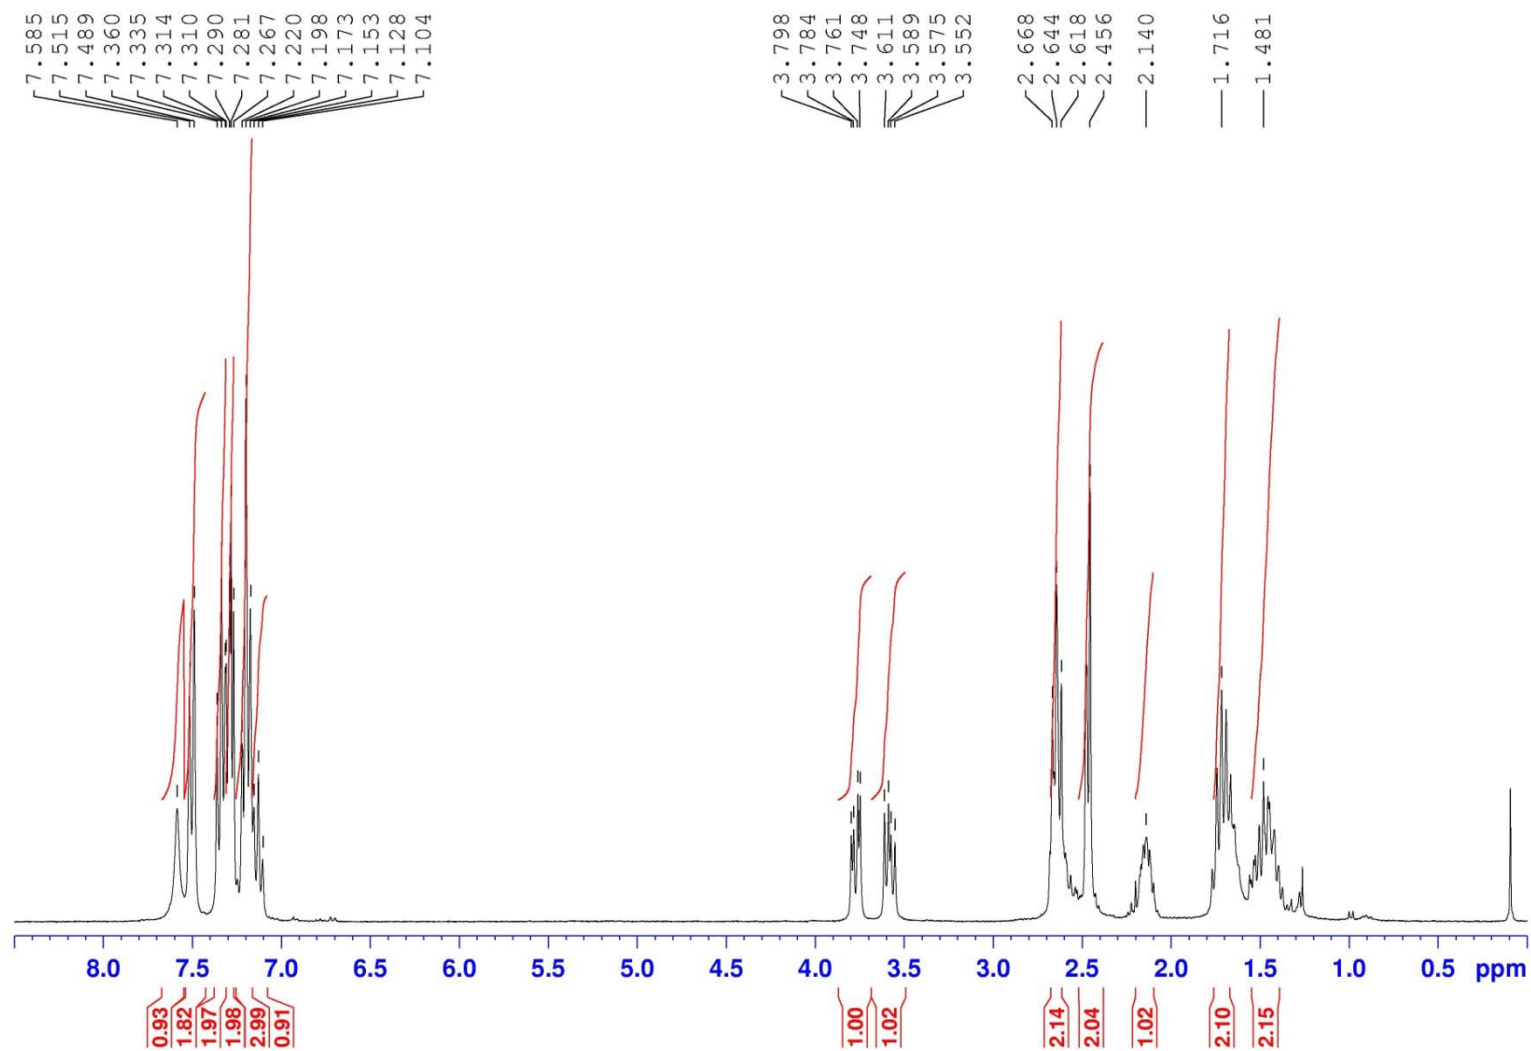

**<sup>13</sup>C NMR of (*R*)-3-(hydroxymethyl)-6-phenylhexanoic acid phenyl amide**

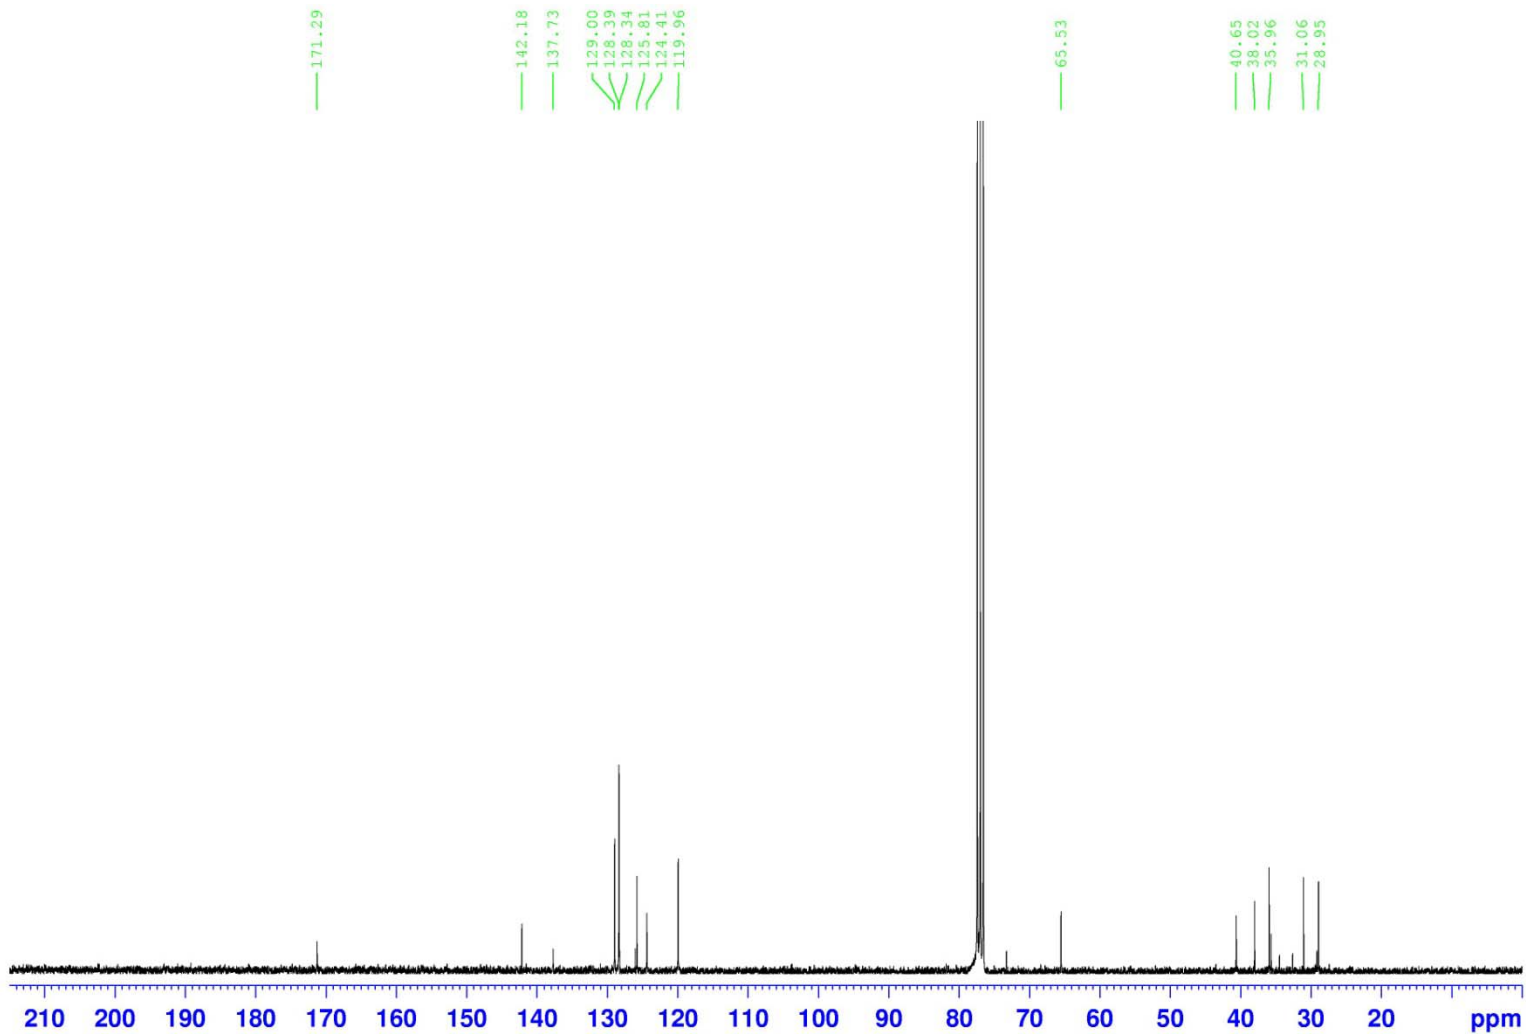

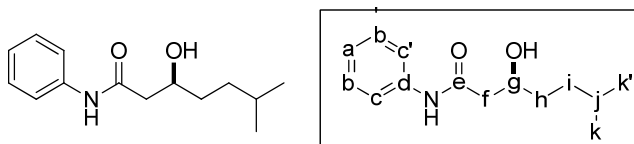

Following Oxidation of (*S*)-**2** using the general procedure for small scale oxidation of purified organoboronates with H<sub>2</sub>O<sub>2</sub> affords, after flash chromatography on silica gel (80–40:20–60 hexanes:ethyl acetate), the title compound (98%) as a white solid.

|                                                       |                                                                                                                                                                                                                                                                                                                                                                                                                                                            |
|-------------------------------------------------------|------------------------------------------------------------------------------------------------------------------------------------------------------------------------------------------------------------------------------------------------------------------------------------------------------------------------------------------------------------------------------------------------------------------------------------------------------------|
| <b>m.p.</b>                                           | 130.2-131.7 °C                                                                                                                                                                                                                                                                                                                                                                                                                                             |
| <b>Optical rotation</b>                               | $[\alpha]_D^{20} = +6.8^\circ$ ( <i>c</i> 0.5, ethanol)                                                                                                                                                                                                                                                                                                                                                                                                    |
| <b>HPLC analysis</b>                                  | (Chiralcel-ASH, 90:10 hexanes:isopropanol) showed peaks at 41.1 minutes (2.5% (R)) and 48.3 minutes (97.5% (S)).                                                                                                                                                                                                                                                                                                                                           |
| <b>TLC analysis</b>                                   | <i>R<sub>f</sub></i> 0.4 (50:50 hexanes:ethyl acetate)                                                                                                                                                                                                                                                                                                                                                                                                     |
| <b><sup>1</sup>H NMR (400 MHz, CDCl<sub>3</sub>)</b>  | δ 7.89 (1H, br s, NH), 7.52 (2H, d, <i>J</i> = 7.7 Hz, c,c'), 7.35 (2H, t, <i>J</i> = 7.6 Hz, b,b'), 7.14 (1H, t, <i>J</i> = 7.4 Hz, a), 4.15-4.00 (1H, m, g), 3.20 (1H, br s, OH), 2.58 and 2.49 (2H, overlapping dd's, <i>J</i> <sub>1</sub> = 15.5 Hz, 2.7 Hz, <i>J</i> <sub>2</sub> = 15.5 Hz, 8.8 Hz, f) 1.70-1.50 (3H, m, h,i), 1.40-1.30 (1H, m, i), 1.30-1.15 (1H, m, j), 0.92 (3H, d, <i>J</i> = 6.6 Hz, k), 0.91 (3H, d, <i>J</i> = 6.6 Hz, k'). |
| <b><sup>13</sup>C NMR (100 MHz, CDCl<sub>3</sub>)</b> | δ 170.56 (e), 137.59 (d), 129.04 (b,b'), 124.46 (a), 120.02 (c,c'), 69.15 (g), 43.78 (f), 34.85 (h), 34.59 (i), 28.00 (j), 22.61 (k), 22.52 (k').                                                                                                                                                                                                                                                                                                          |
| <b>IR (neat)</b>                                      | 3286 (N-H stretch), 2953, 2869, 1663 (C=O stretch), 1598, 1548, 1442, 1314, 1256, 1079, 716, 692 cm <sup>-1</sup> .                                                                                                                                                                                                                                                                                                                                        |
| <b>HRMS (FAB)</b>                                     | Calcd. for C <sub>14</sub> H <sub>22</sub> NO <sub>2</sub> (M+H): 236.1651, found 236.1645 <i>m/z</i> .                                                                                                                                                                                                                                                                                                                                                    |

**<sup>1</sup>H NMR of (*S*)-3-hydroxy-6-methylheptanoic acid phenyl amide**

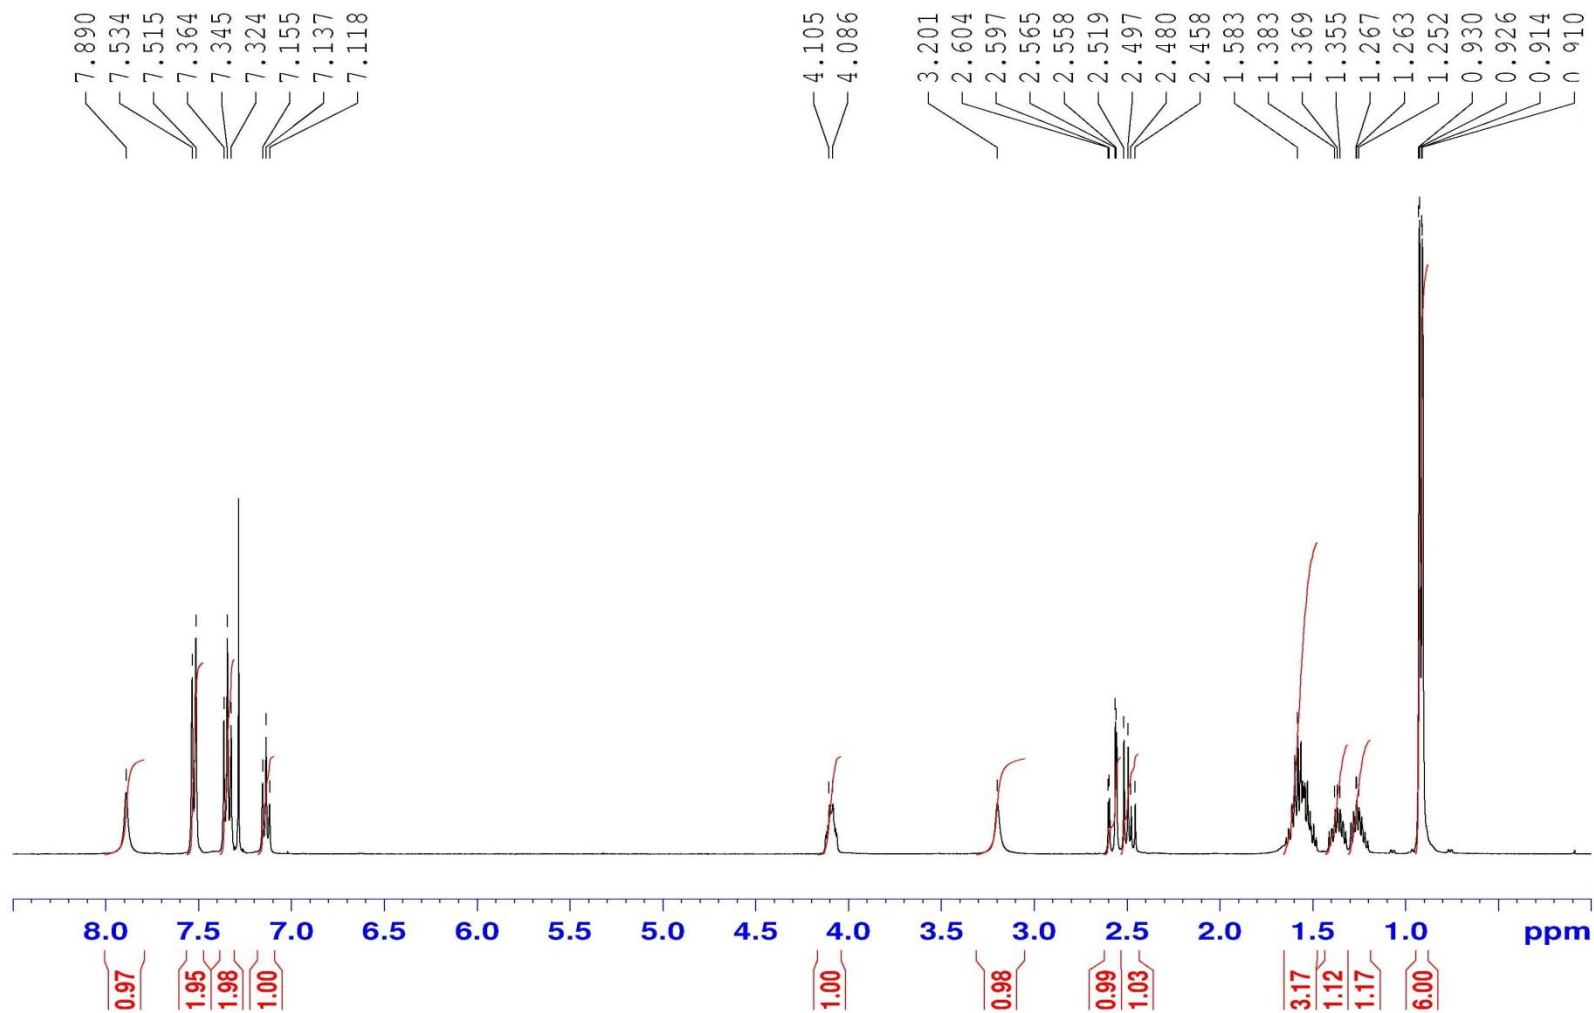

**$^{13}\text{C}$  NMR of (*S*)-3-hydroxy-6-methylheptanoic acid phenyl amide**

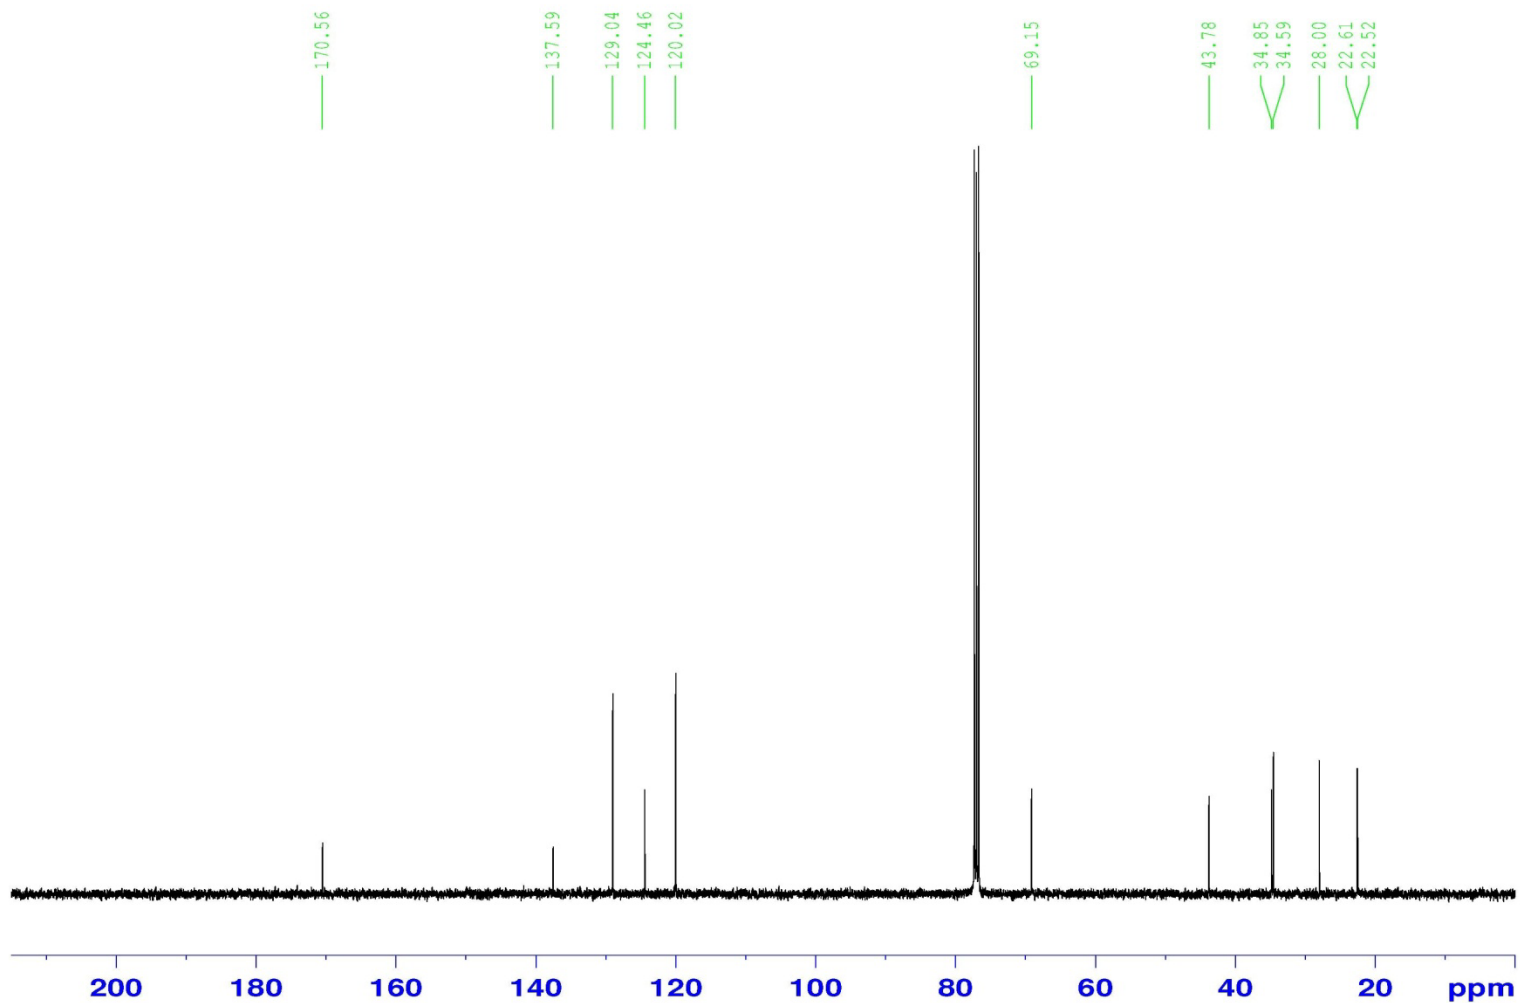

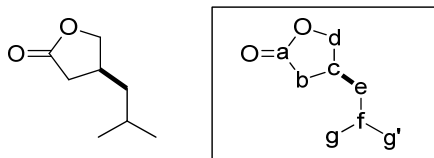

(S)-20

Following the procedure for lactonization via CAHB-oxidation of **7i** affords, after flash chromatography on silica gel (75:25 hexanes:ethyl acetate), the title compound (78%) as a light yellow oil.

|                                                       |                                                                                                                                                                                                                                                                                                                                                      |
|-------------------------------------------------------|------------------------------------------------------------------------------------------------------------------------------------------------------------------------------------------------------------------------------------------------------------------------------------------------------------------------------------------------------|
| <b>Optical rotation</b>                               | $[\alpha]_{\text{D}}^{20} = -1.5^{\circ}$ ( <i>c</i> 0.5, CHCl <sub>3</sub> )                                                                                                                                                                                                                                                                        |
| <b>TLC analysis</b>                                   | <i>R<sub>f</sub></i> 0.5 (75:25 hexanes:ethyl acetate)                                                                                                                                                                                                                                                                                               |
| <b><sup>1</sup>H NMR (400 MHz, CDCl<sub>3</sub>)</b>  | δ 4.41 (1H, dd, <i>J</i> <sub>1</sub> = 8.8 Hz, <i>J</i> <sub>2</sub> = 8.1 Hz, d), 3.88 (1H, dd, <i>J</i> <sub>1</sub> = 8.9 Hz, <i>J</i> <sub>2</sub> = 8.6 Hz, d), 2.70–2.55 (2H, m, b), 2.25–2.10 (1H, m, c), 1.65–1.50 (1H, m, f), 1.36 (2H, t, <i>J</i> = 7.1 Hz, e), 0.93 (3H, t, <i>J</i> = 6.6 Hz, g), 0.90 (3H, t, <i>J</i> = 6.6 Hz, g'). |
| <b><sup>13</sup>C NMR (100 MHz, CDCl<sub>3</sub>)</b> | δ 177.22 (a), 73.56 (d), 42.21 (e), 34.76 (b), 33.83 (c), 26.28 (f), 22.64 (g), 22.40 (g').                                                                                                                                                                                                                                                          |
| <b>IR (neat)</b>                                      | 2956, 2903, 1773 (C=O stretch), 1469, 1420, 1367, 1216, 1168 (C-O stretch), 1011, 913, 838, 730, 646, 557 cm <sup>-1</sup> .                                                                                                                                                                                                                         |

**<sup>1</sup>H NMR of (S)-20**

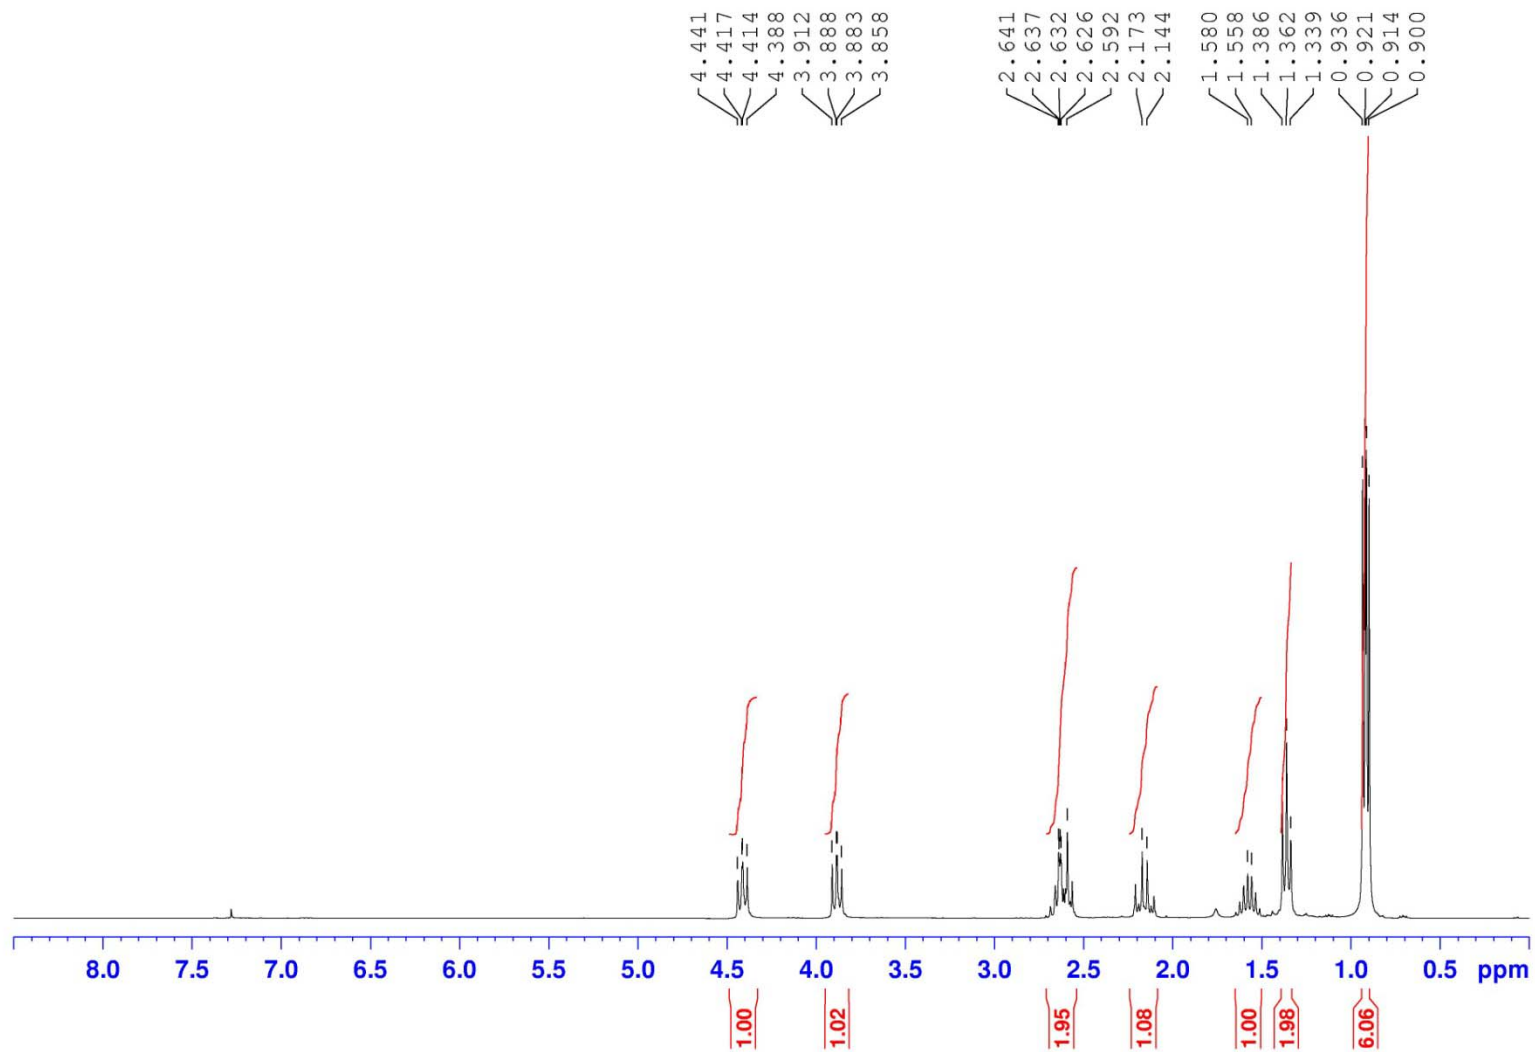



**<sup>13</sup>C NMR of (S)-20**

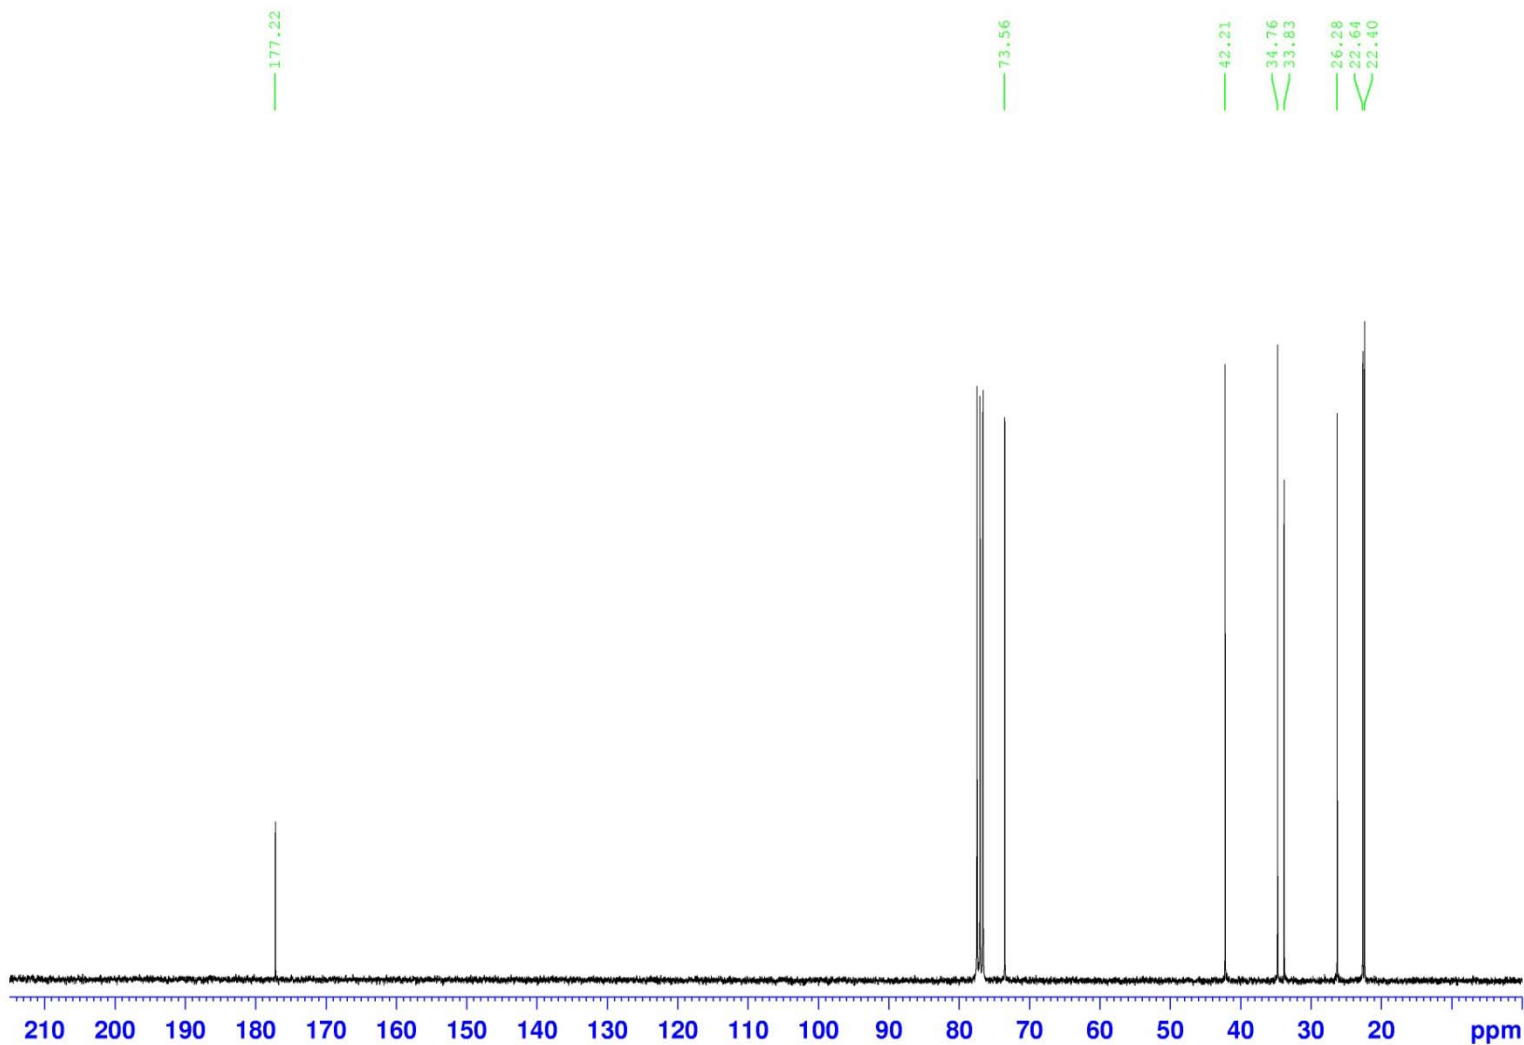

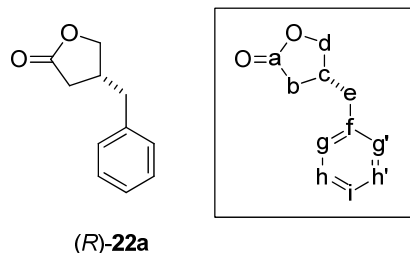

Following the procedure for lactonization via CAHB-oxidation of **21a** affords, after flash chromatography on silica gel (75:25 hexanes:ethyl acetate), the title compound (80%) as a light yellow oil.

|                                                       |                                                                                                                                                                                                                                                                                                                                                                                                                                                                                                     |
|-------------------------------------------------------|-----------------------------------------------------------------------------------------------------------------------------------------------------------------------------------------------------------------------------------------------------------------------------------------------------------------------------------------------------------------------------------------------------------------------------------------------------------------------------------------------------|
| <b>Optical rotation</b>                               | $[\alpha]_{\text{D}}^{20} = +5.3^{\circ}$ ( <i>c</i> 0.5, CHCl <sub>3</sub> )                                                                                                                                                                                                                                                                                                                                                                                                                       |
| <b>HPLC analysis</b>                                  | (Chiralpak-AD, 95:5 hexanes:isopropanol) shows peaks at 36 minutes (97.5% (R)) and 40 minutes (2.5% (S))                                                                                                                                                                                                                                                                                                                                                                                            |
| <b>TLC analysis</b>                                   | <i>R<sub>f</sub></i> 0.4 (75:25 hexanes:ethyl acetate)                                                                                                                                                                                                                                                                                                                                                                                                                                              |
| <b><sup>1</sup>H NMR (400 MHz, CDCl<sub>3</sub>)</b>  | δ 7.34 (2H, t, <i>J</i> = 7.2 Hz, h, h'), 7.27 (1H, d, <i>J</i> = 6.9 Hz, i), 7.17 (2H, d, <i>J</i> = 7.3 Hz, g, g'), 4.35 (1H, dd, <i>J<sub>1</sub></i> = 8.9 Hz, <i>J<sub>2</sub></i> = 8.9 Hz, d), 4.05 (1H, dd, <i>J<sub>1</sub></i> = 6.2 Hz, <i>J<sub>2</sub></i> = 6.1 Hz, d), 2.95–2.85 (1H, m, c), 2.85–2.75 (2H, m, e), 2.62 (1H, dd, <i>J<sub>1</sub></i> = 17.4 Hz, <i>J<sub>2</sub></i> = 7.9 Hz, b), 2.31 (1H, dd, <i>J<sub>1</sub></i> = 17.4 Hz, <i>J<sub>2</sub></i> = 6.9 Hz, b). |
| <b><sup>13</sup>C NMR (100 MHz, CDCl<sub>3</sub>)</b> | δ 176.84 (a), 138.25 (f), 128.81 (g, g'), 128.67 (h, h'), 126.83 (i), 72.66 (d), 38.95 (e), 37.18 (b), 34.25 (c).                                                                                                                                                                                                                                                                                                                                                                                   |
| <b>IR (neat)</b>                                      | 2963, 2909, 1773 (C=O stretch), 1496, 1417, 1257, 1166 (C-O stretch), 1088, 1012, 910, 797, 731, 699, 638, 531 cm <sup>-1</sup> .                                                                                                                                                                                                                                                                                                                                                                   |

**<sup>1</sup>H NMR of (R)-22a**

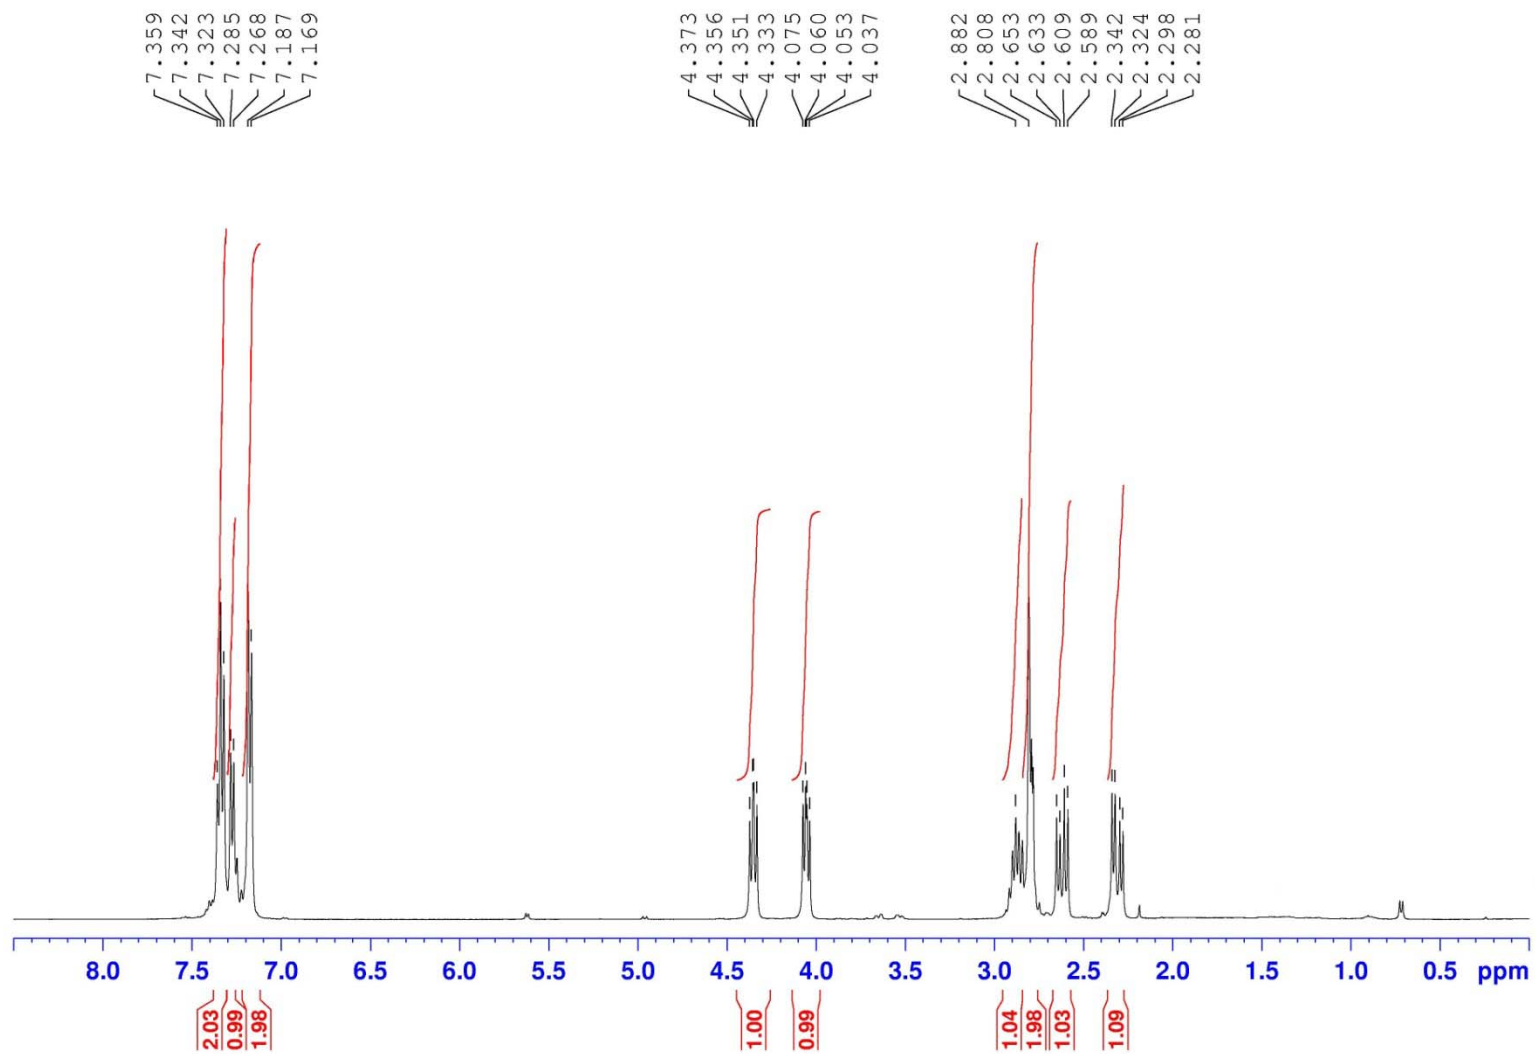

**<sup>13</sup>C NMR of (*R*)-22a**

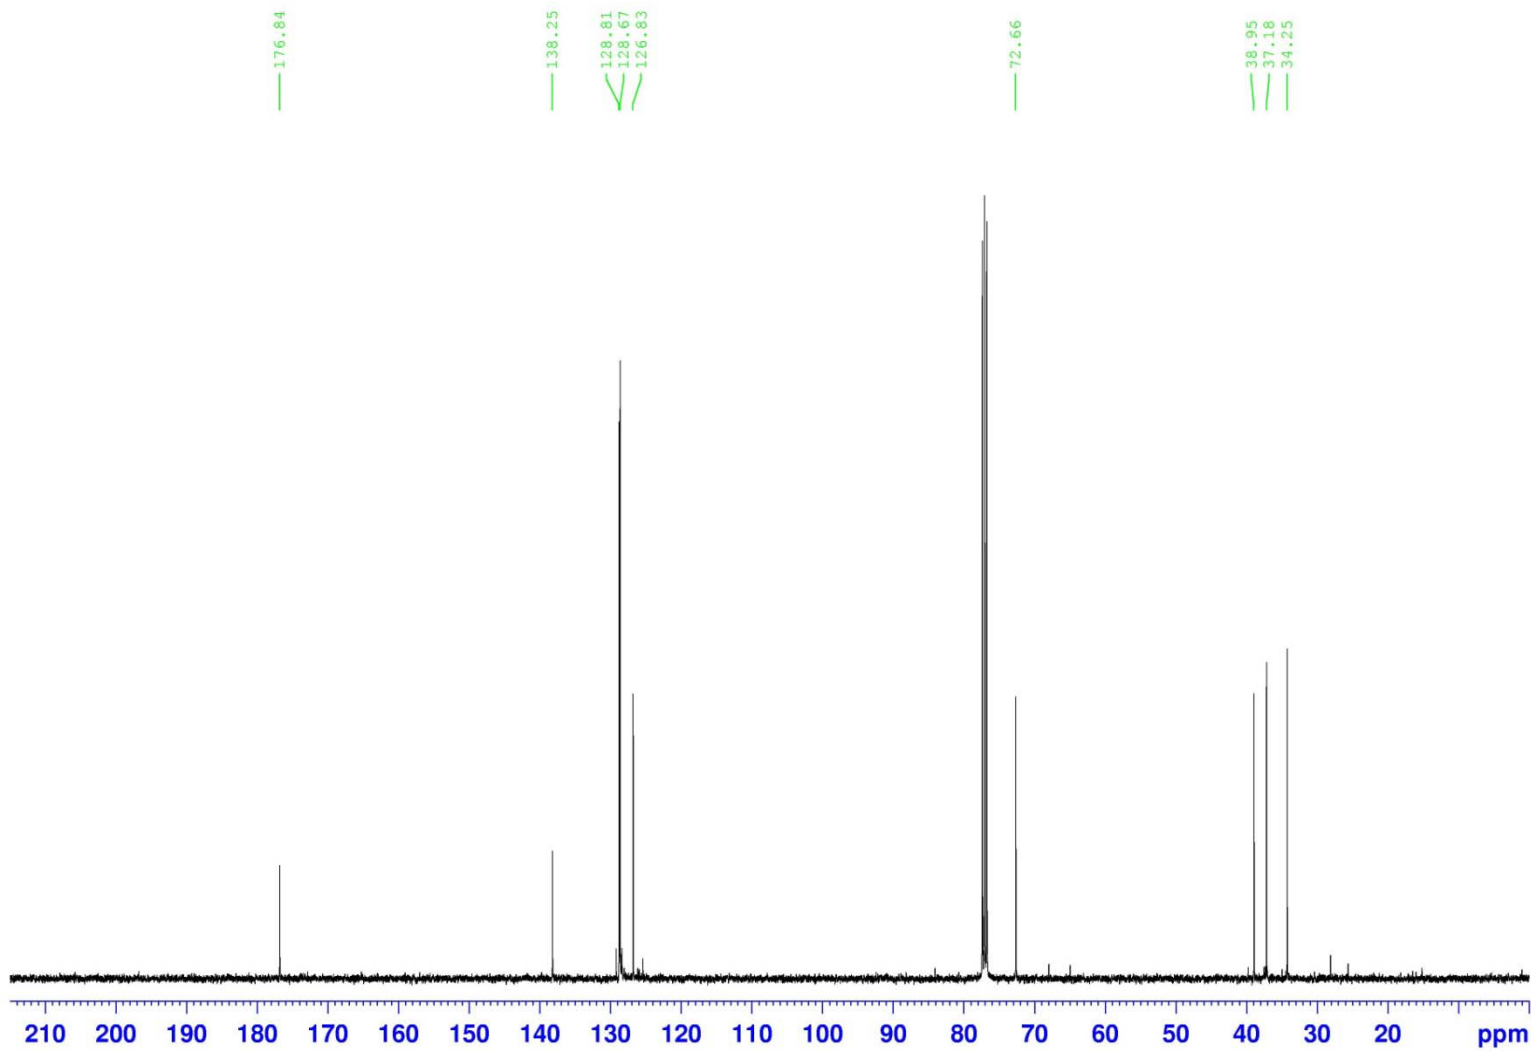

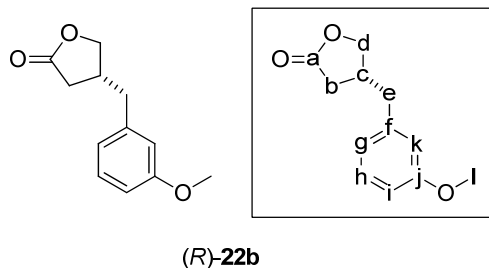

Following the procedure for lactonization via CAHB-oxidation of **21b** affords, after flash chromatography on silica gel (75:25 hexanes:ethyl acetate), the title compound (79%) as a light yellow oil.

|                                                      |                                                                                                                                                                                                                                                                                                                                                                                                                                                                                                                         |
|------------------------------------------------------|-------------------------------------------------------------------------------------------------------------------------------------------------------------------------------------------------------------------------------------------------------------------------------------------------------------------------------------------------------------------------------------------------------------------------------------------------------------------------------------------------------------------------|
| <b>Optical rotation</b>                              | $[\alpha]_{\text{D}}^{20} = +5.5^{\circ}$ ( <i>c</i> 0.5, CHCl <sub>3</sub> )                                                                                                                                                                                                                                                                                                                                                                                                                                           |
| <b>HPLC analysis</b>                                 | (Chiralpak-AD, 90:10 hexanes:isopropanol) showed peaks at 31 minutes (97.5% (R)) and 34 minutes (2.5% (S))                                                                                                                                                                                                                                                                                                                                                                                                              |
| <b>TLC analysis</b>                                  | 0.3 (75:25 hexanes:ethyl acetate)                                                                                                                                                                                                                                                                                                                                                                                                                                                                                       |
| <b><sup>1</sup>H NMR (300 MHz, CDCl<sub>3</sub>)</b> | δ 7.25 (1H, t, <i>J</i> = 8.1 Hz, h), 6.85–6.80 (1H, m, i), 6.75 (1H, d, <i>J</i> = 7.5 Hz, g), 7.71 (1H, s, k), 4.35 (1H, dd, <i>J</i> <sub>l</sub> = 9.1 Hz, <i>J</i> <sub>2</sub> = 6.9 Hz, d), 4.05 (1H, dd, <i>J</i> <sub>l</sub> = 9.1 Hz, <i>J</i> <sub>2</sub> = 6.0 Hz, d), 3.82 (3H, s, l), 2.95–2.80 (1H, m, c), 2.80–2.75 (2H, m, e), 2.62 (1H, dd, <i>J</i> <sub>l</sub> = 17.4 Hz, <i>J</i> <sub>2</sub> = 7.9 Hz, b), 2.30 (1H, dd, <i>J</i> <sub>l</sub> = 17.4 Hz, <i>J</i> <sub>2</sub> = 6.9 Hz, b). |
| <b><sup>13</sup>C NMR (75 MHz, CDCl<sub>3</sub>)</b> | δ 176.80 (a), 159.91 (j), 139.81 (f), 129.82 (h), 120.97 (g), 114.64 (k), 111.86 (i), 72.64 (d), 55.20 (l), 38.97 (e), 37.07 (b), 34.26 (c).                                                                                                                                                                                                                                                                                                                                                                            |
| <b>IR (neat)</b>                                     | 2913, 1774 (C=O stretch), 1601, 1584, 1481, 1454, 1261, 1165 (C-O stretch), 1152 (C-O stretch), 1039, 1013, 909, 784, 727, 698, 647 cm <sup>-1</sup> .                                                                                                                                                                                                                                                                                                                                                                  |

**<sup>1</sup>H NMR of (*R*)-22b**

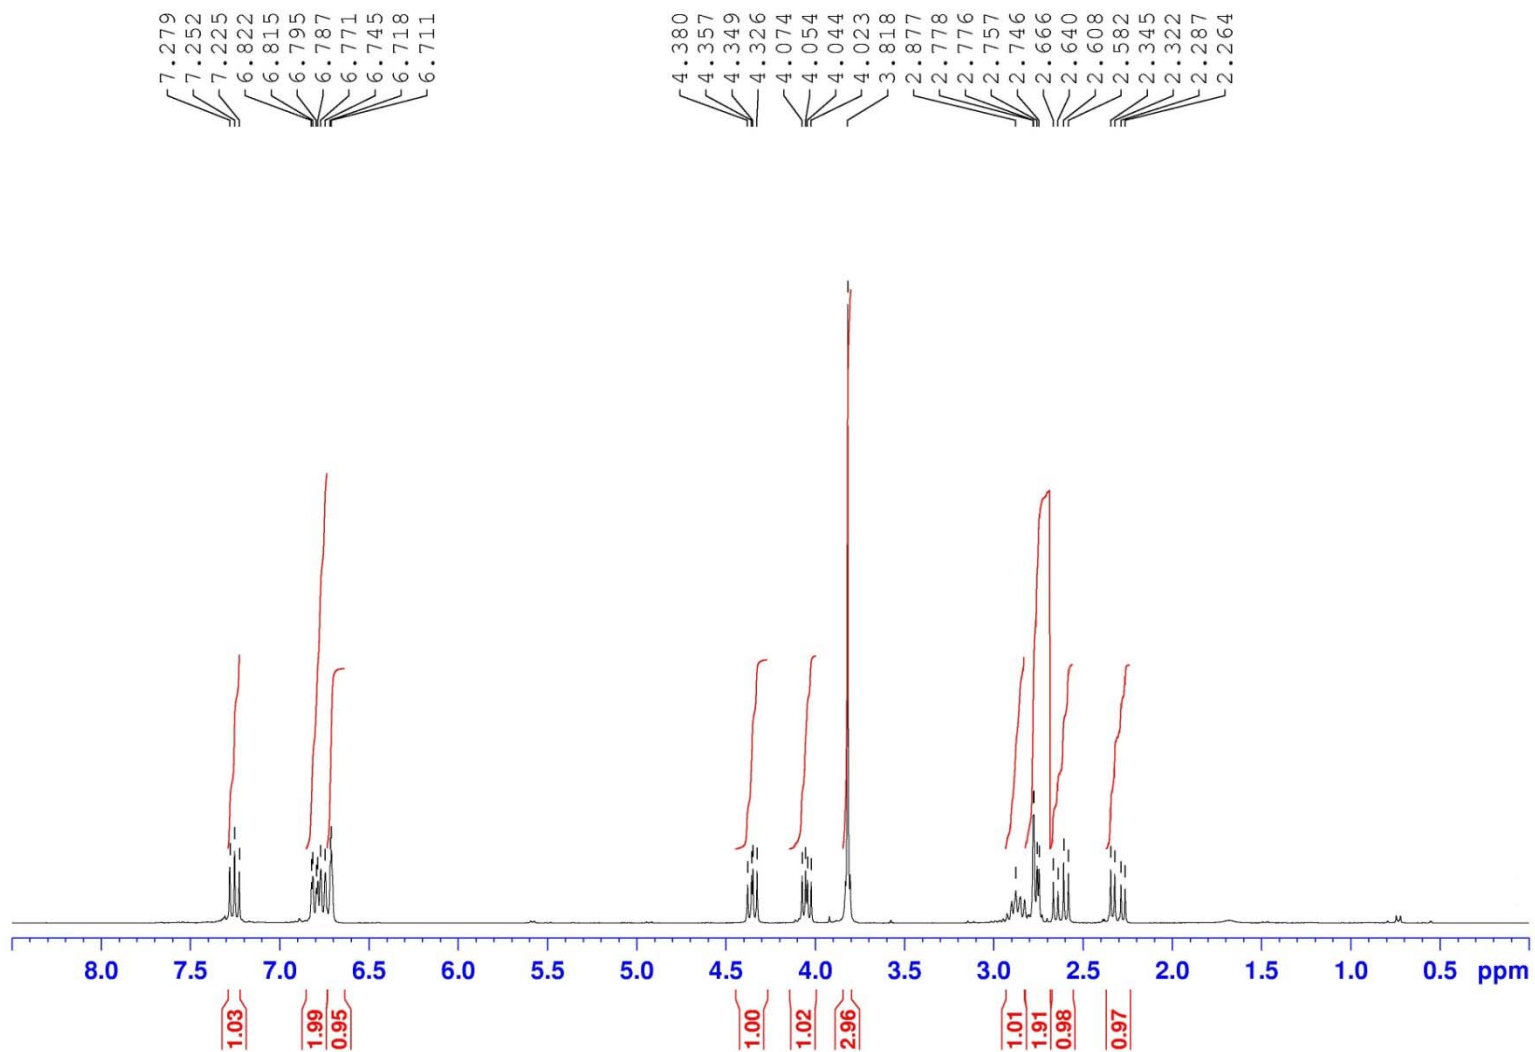

**$^{13}\text{C}$  NMR of (*R*)-22b**

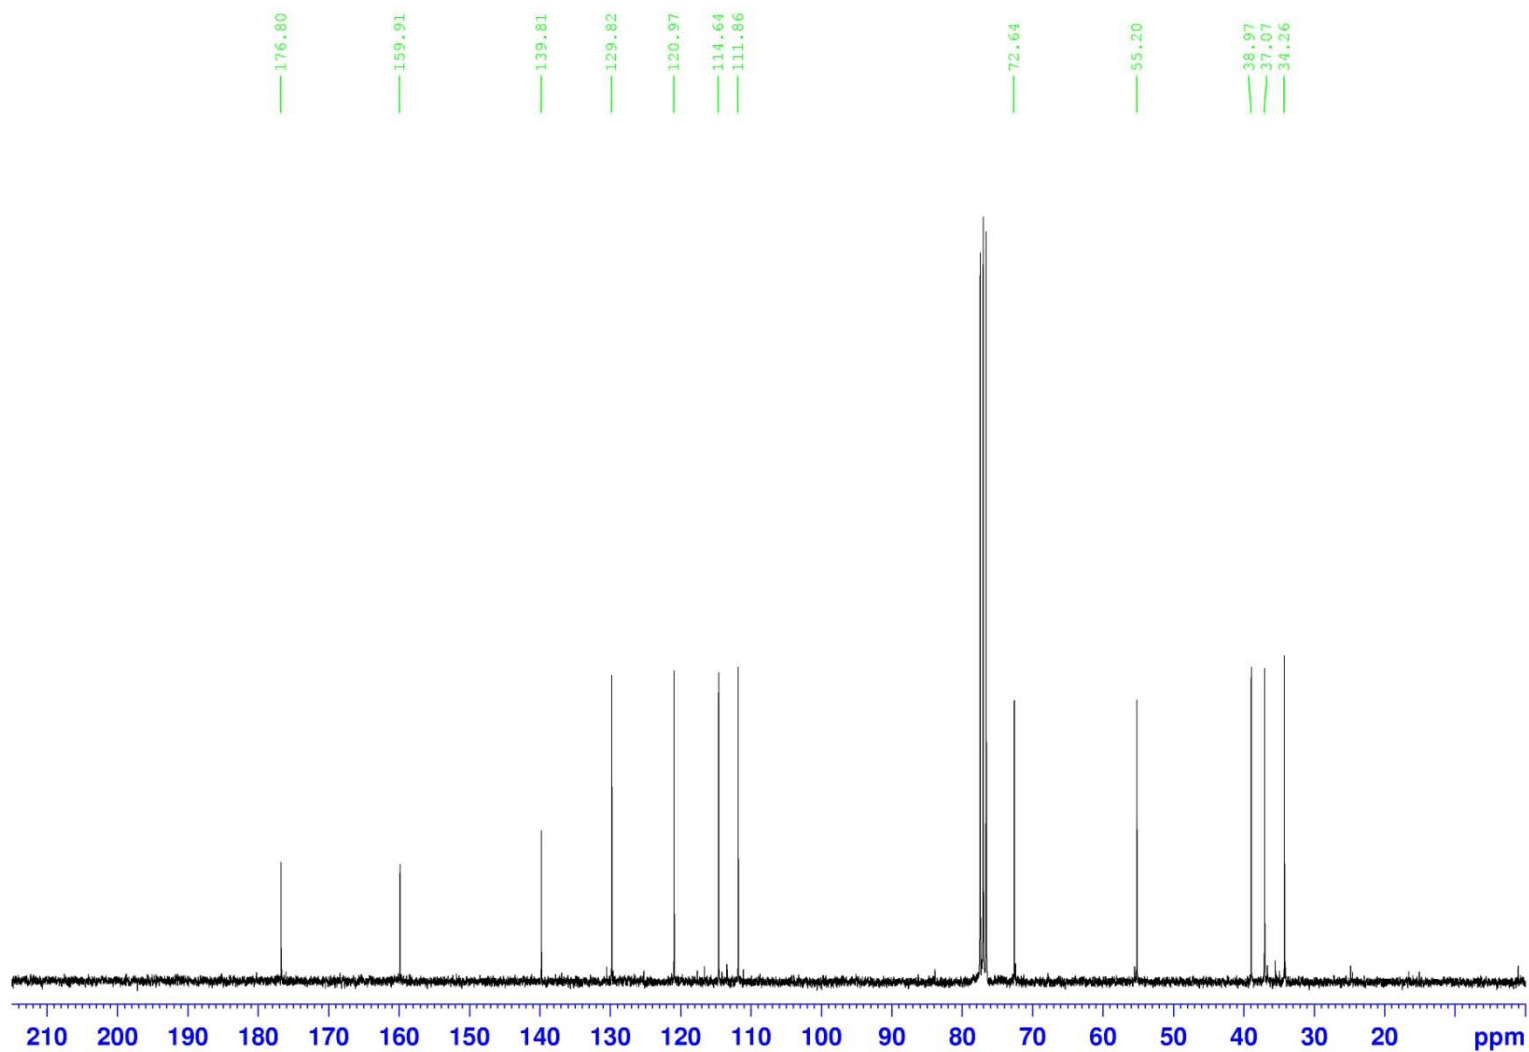

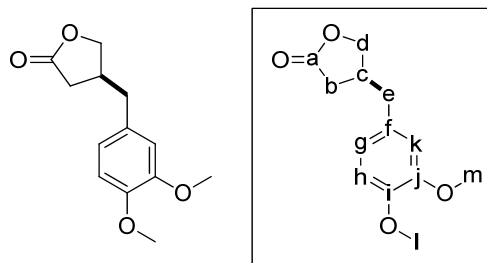

(S)-**22c**

Following the procedure for lactonization via CAHB-oxidation of **21c** affords, after flash chromatography on silica gel (75:25 hexanes:ethyl acetate), the title compound (75%) as a light yellow oil.

|                                                       |                                                                                                                                                                                                                                                                                                                                                                                                                                                                                              |
|-------------------------------------------------------|----------------------------------------------------------------------------------------------------------------------------------------------------------------------------------------------------------------------------------------------------------------------------------------------------------------------------------------------------------------------------------------------------------------------------------------------------------------------------------------------|
| <b>Optical rotation</b>                               | $[\alpha]_{\text{D}}^{20} = -5.8^{\circ}$ ( <i>c</i> 0.5, CHCl <sub>3</sub> )                                                                                                                                                                                                                                                                                                                                                                                                                |
| <b>HPLC analysis</b>                                  | (Chiralpak-AD, 90:10 hexanes:isopropanol) shows peaks at 30 minutes (4.0% (R)) and 34 minutes (96.0% (S))                                                                                                                                                                                                                                                                                                                                                                                    |
| <b>TLC analysis</b>                                   | <i>R<sub>f</sub></i> 0.3 (75:25 hexanes:ethyl acetate)                                                                                                                                                                                                                                                                                                                                                                                                                                       |
| <b><sup>1</sup>H NMR (400 MHz, CDCl<sub>3</sub>)</b>  | δ 6.81 (1H, d, <i>J</i> = 8.1 Hz, h), 6.75–6.70 (1H, m, g), 6.67 (1H, s, k), 4.33 (1H, dd, <i>J<sub>l</sub></i> = 9.0 Hz, <i>J<sub>2</sub></i> = 7.0 Hz, d), 4.04 (1H, dd, <i>J<sub>l</sub></i> = 9.0 Hz, <i>J<sub>2</sub></i> = 6.1 Hz, d), 3.88 (3H, s, m), 3.87 (3H, s, l), 2.90–2.80 (1H, m, c), 2.80–2.65 (2H, m, e), 2.61 (1H, dd, <i>J<sub>l</sub></i> = 17.5 Hz, <i>J<sub>2</sub></i> = 8.1 Hz, b), 2.30 (1H, dd, <i>J<sub>l</sub></i> = 17.5 Hz, <i>J<sub>2</sub></i> = 6.8 Hz, e). |
| <b><sup>13</sup>C NMR (100 MHz, CDCl<sub>3</sub>)</b> | δ 176.95 (a), 149.10 (j), 147.88 (i), 130.77 (f), 120.65 (g), 111.79 (k), 111.41 (h), 72.66 (d), 55.92 (l), 55.90 (m), 38.57 (e), 37.29 (b), 34.24 (c).                                                                                                                                                                                                                                                                                                                                      |
| <b>IR (neat)</b>                                      | 2908, 2836, 2253, 1770 (C=O stretch), 1514, 1464, 1418, 1262, 1234, 1158 (C-O stretch), 1139 (C-O stretch), 1014 (C-O stretch), 912, 805, 725, 646 cm <sup>-1</sup> .                                                                                                                                                                                                                                                                                                                        |



**<sup>1</sup>H NMR of (S)-22c**

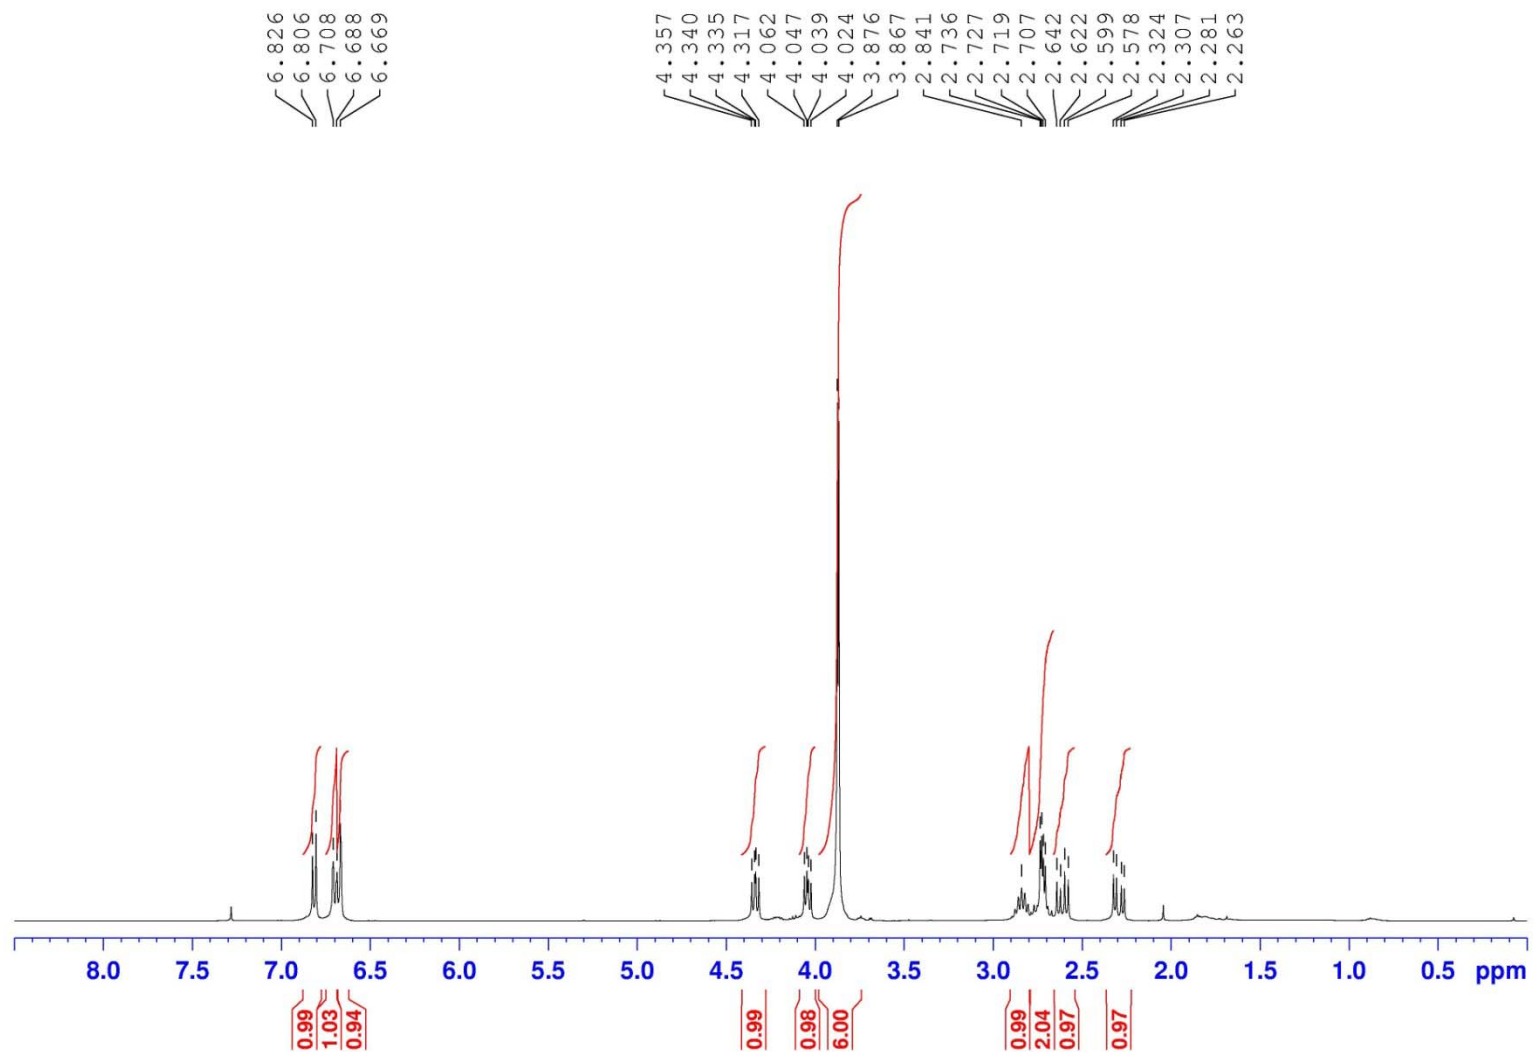

<sup>13</sup>C NMR of (*S*)-22c

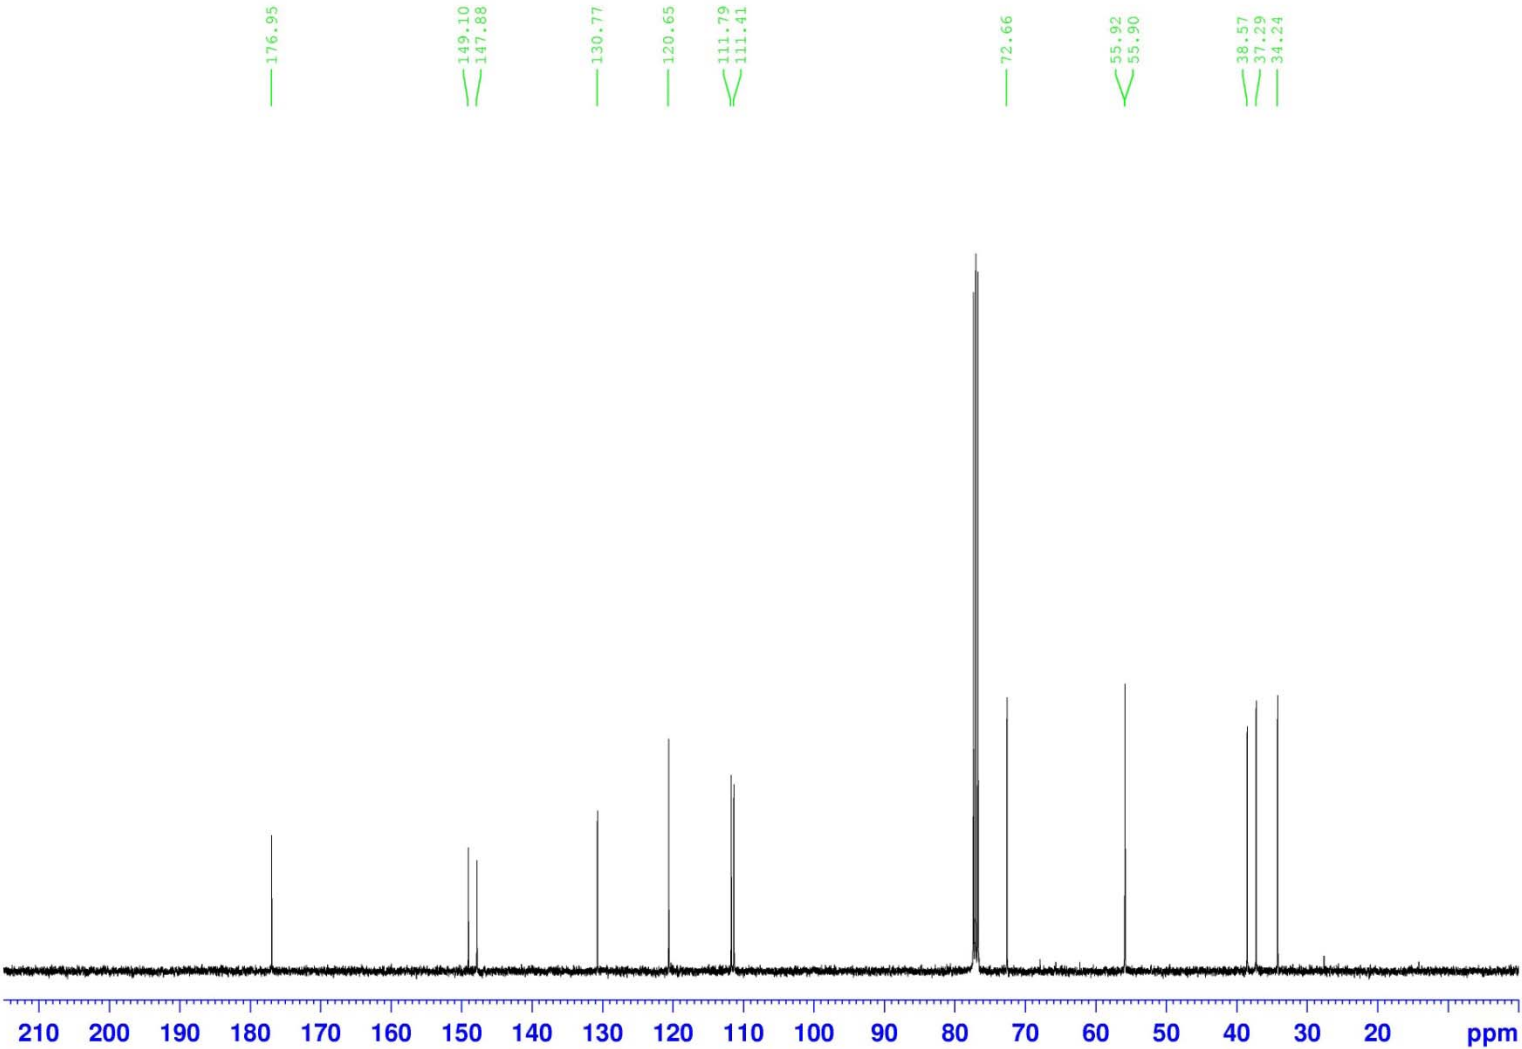

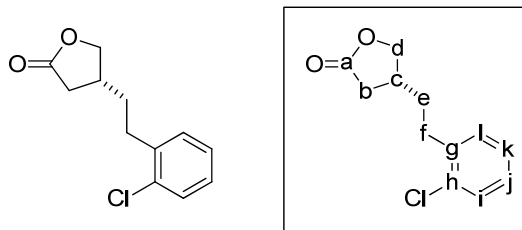

Following the procedure for lactonization via CAHB-oxidation of **12** affords, after flash chromatography on silica gel (75:25 hexanes:ethyl acetate), the title compound (73%) as a light yellow oil.

|                                                      |                                                                                                                                                                                                                                                                                                          |
|------------------------------------------------------|----------------------------------------------------------------------------------------------------------------------------------------------------------------------------------------------------------------------------------------------------------------------------------------------------------|
| <b>Optical rotation</b>                              | $[\alpha]_{\text{D}}^{20} = +4.4^{\circ}$ ( <i>c</i> 0.5, CHCl <sub>3</sub> )                                                                                                                                                                                                                            |
| <b>HPLC analysis</b>                                 | (Chiralpak-AD, 90:10 hexanes:isopropanol) shows peaks at 25 minutes (95.0% (R)) and 28 minutes (5.0% (S))                                                                                                                                                                                                |
| <b>TLC analysis</b>                                  | <i>R<sub>f</sub></i> 0.5 (75:25 hexanes:ethyl acetate)                                                                                                                                                                                                                                                   |
| <b><sup>1</sup>H NMR (300 MHz, CDCl<sub>3</sub>)</b> | δ 7.40 (1H, m, j), 7.25–7.15 (3H, m, i,k,l), 4.45 (1H, dd, <i>J</i> <sub>1</sub> = 9.0 Hz, <i>J</i> <sub>2</sub> = 7.5 Hz, d), 3.99 (1H, dd, <i>J</i> <sub>1</sub> = 9.0 Hz, <i>J</i> <sub>2</sub> = 7.0 Hz, d), 2.85–2.75 (2H, m, f), 2.75–2.50 (2H, m, b), 2.30–2.20 (1H, m, c), 1.90–1.75 (2H, m, e). |
| <b><sup>13</sup>C NMR (75 MHz, CDCl<sub>3</sub>)</b> | δ 177.06 (a), 138.44 (g), 133.77 (h), 130.30 (i), 129.71 (j), 127.89 (k), 127.07 (l), 73.22 (d), 35.26 (e), 34.46 (b), 33.25 (f), 31.46 (c).                                                                                                                                                             |
| <b>IR (neat)</b>                                     | 2923, 1771 (C=O stretch), 1474, 1170 (C-O stretch), 1050, 1020, 991, 908, 840, 752, 727, 680 cm <sup>-1</sup> .                                                                                                                                                                                          |
| <b>HRMS (ESI)</b>                                    | Calcd. for C <sub>12</sub> H <sub>13</sub> ClO <sub>2</sub> : 224.0604, found 224.0600 <i>m/z</i> .                                                                                                                                                                                                      |

**<sup>1</sup>H NMR of (*R*)-4-(2-(2-chlorophenyl)ethyl)butyrolactone**

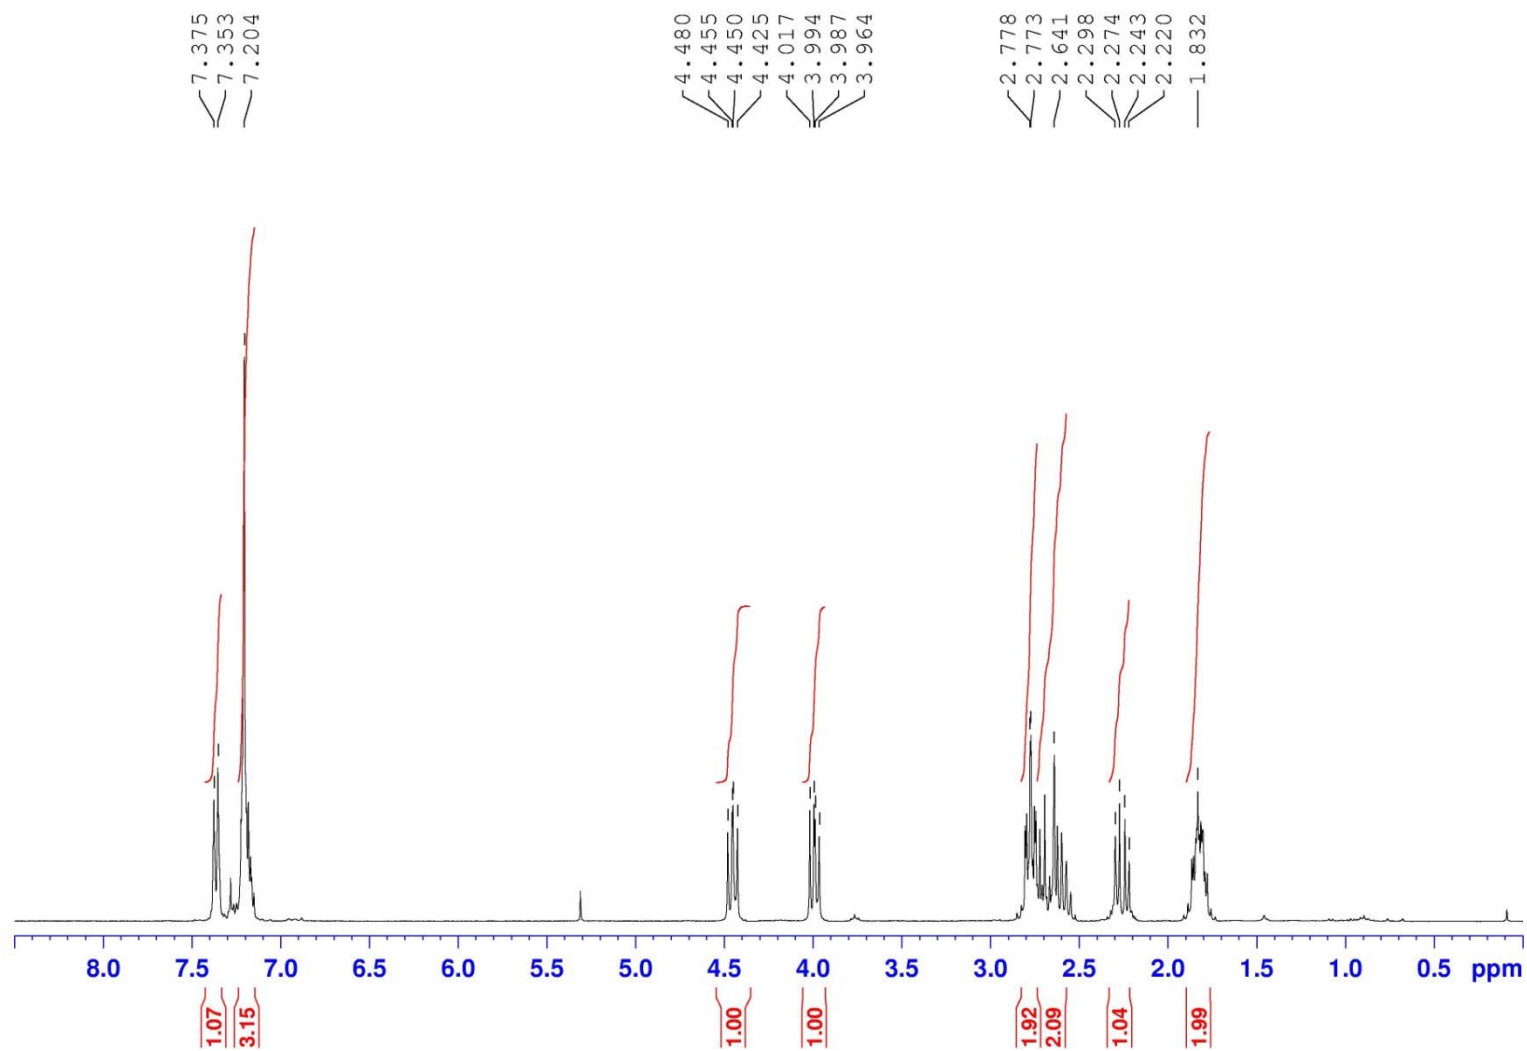

**<sup>13</sup>C NMR of (*R*)-4-(2-(2-chlorophenyl)ethyl)butyrolactone**

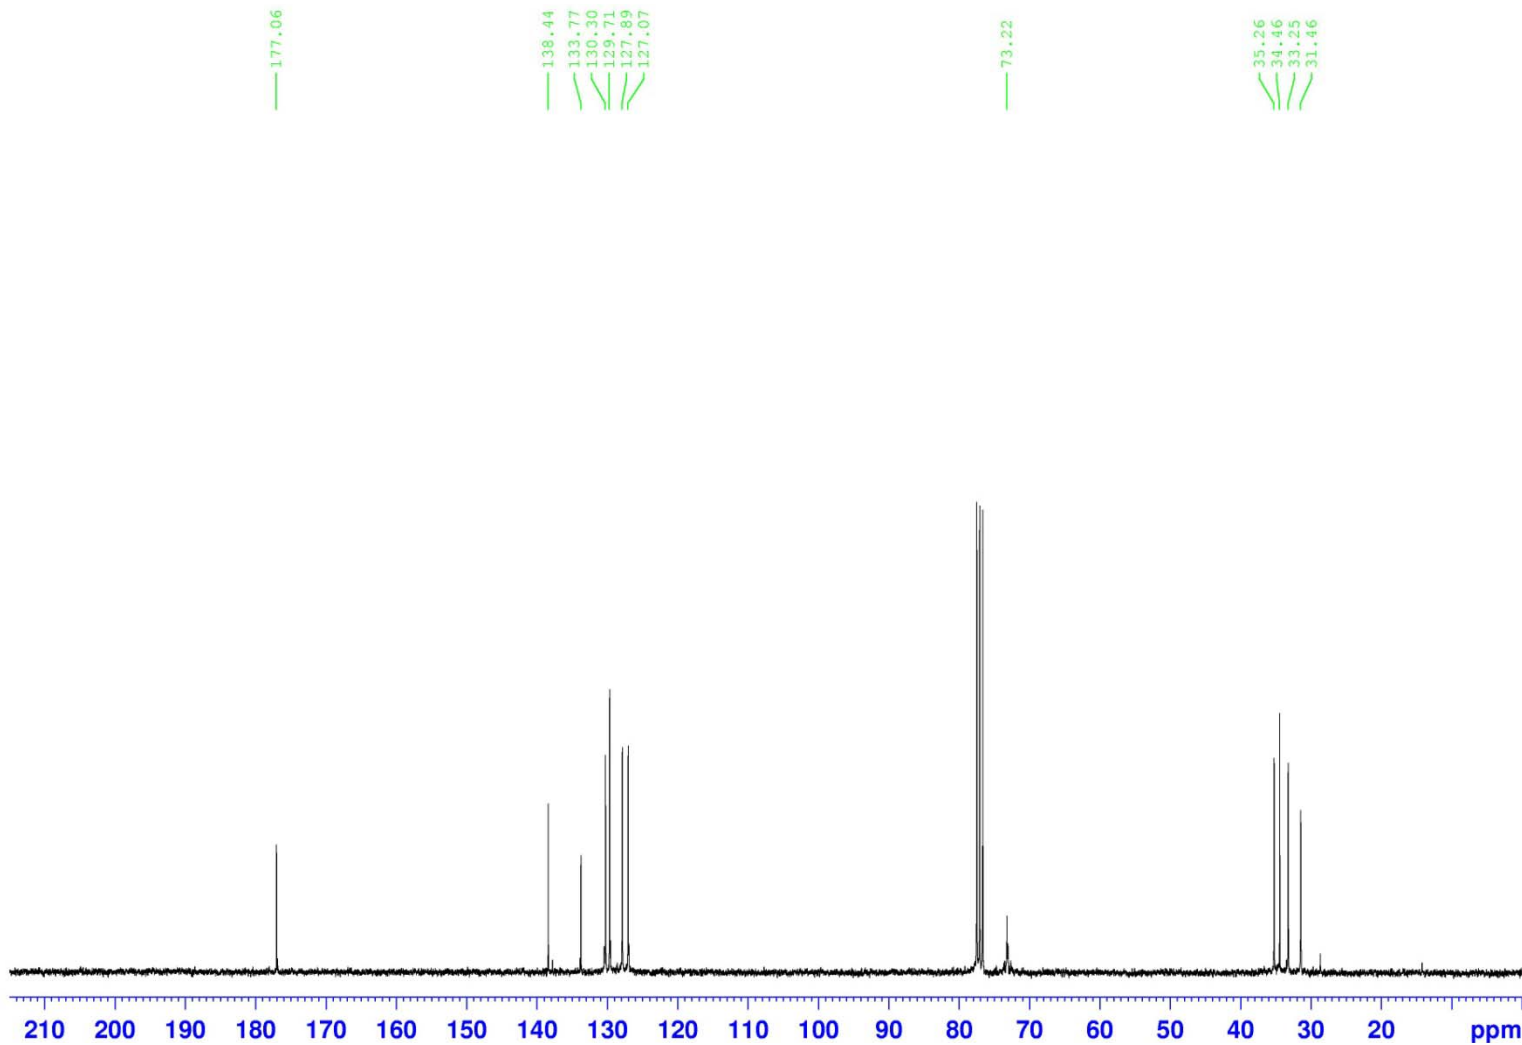

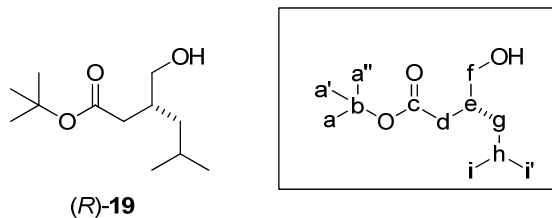

Following the general procedure for CAHB-oxidation of **7i** with NaBO<sub>3</sub> affords, after flash chromatography on silica gel (80–70:20–30 hexanes:dichloromethane), the title compound (77%) as a light yellow oil.

|                                                      |                                                                                                                                                                                                                                                                                                                           |
|------------------------------------------------------|---------------------------------------------------------------------------------------------------------------------------------------------------------------------------------------------------------------------------------------------------------------------------------------------------------------------------|
| <b>Optical rotation</b>                              | $[\alpha]_{\text{D}}^{20} = +2.3^{\circ}$ ( <i>c</i> 0.5, CHCl <sub>3</sub> )                                                                                                                                                                                                                                             |
| <b>TLC analysis</b>                                  | 0.6 (50:50 hexanes:dichloromethane)                                                                                                                                                                                                                                                                                       |
| <b><sup>1</sup>H NMR (300 MHz, CDCl<sub>3</sub>)</b> | δ 3.70–3.60 (1H, m, f), 3.60–3.40 (1H, m, f), 2.28 (2H, dd, <i>J</i> <sub>1</sub> = 4.4 Hz, <i>J</i> <sub>2</sub> = 2.5 Hz, d), 2.16 (1H, br s, OH), 2.10–2.00 (1H, m, e), 1.70–1.60 (1H, m, h), 1.47 (9H, s, a, a', a''), 1.30–1.20 (2H, m, g), 0.92 (3H, d, <i>J</i> = 4.7 Hz, i), 0.90 (3H, d, <i>J</i> = 4.7 Hz, i'). |
| <b><sup>13</sup>C NMR (75 MHz, CDCl<sub>3</sub>)</b> | δ 173.32 (c), 80.62 (b), 66.07 (f), 40.43 (g), 38.46 (d), 35.71 (e), 28.08 (a, a', a''), 25.19 (h), 22.80 (i), 22.67 (i').                                                                                                                                                                                                |
| <b>IR (neat)</b>                                     | 3404 (O-H stretch), 2956, 2930, 1728 (C=O stretch), 1468, 1367, 1311 (C-O stretch), 1254, 1154, 1062, 959, 733 cm <sup>-1</sup> .                                                                                                                                                                                         |

**<sup>1</sup>H NMR of (R)-19**

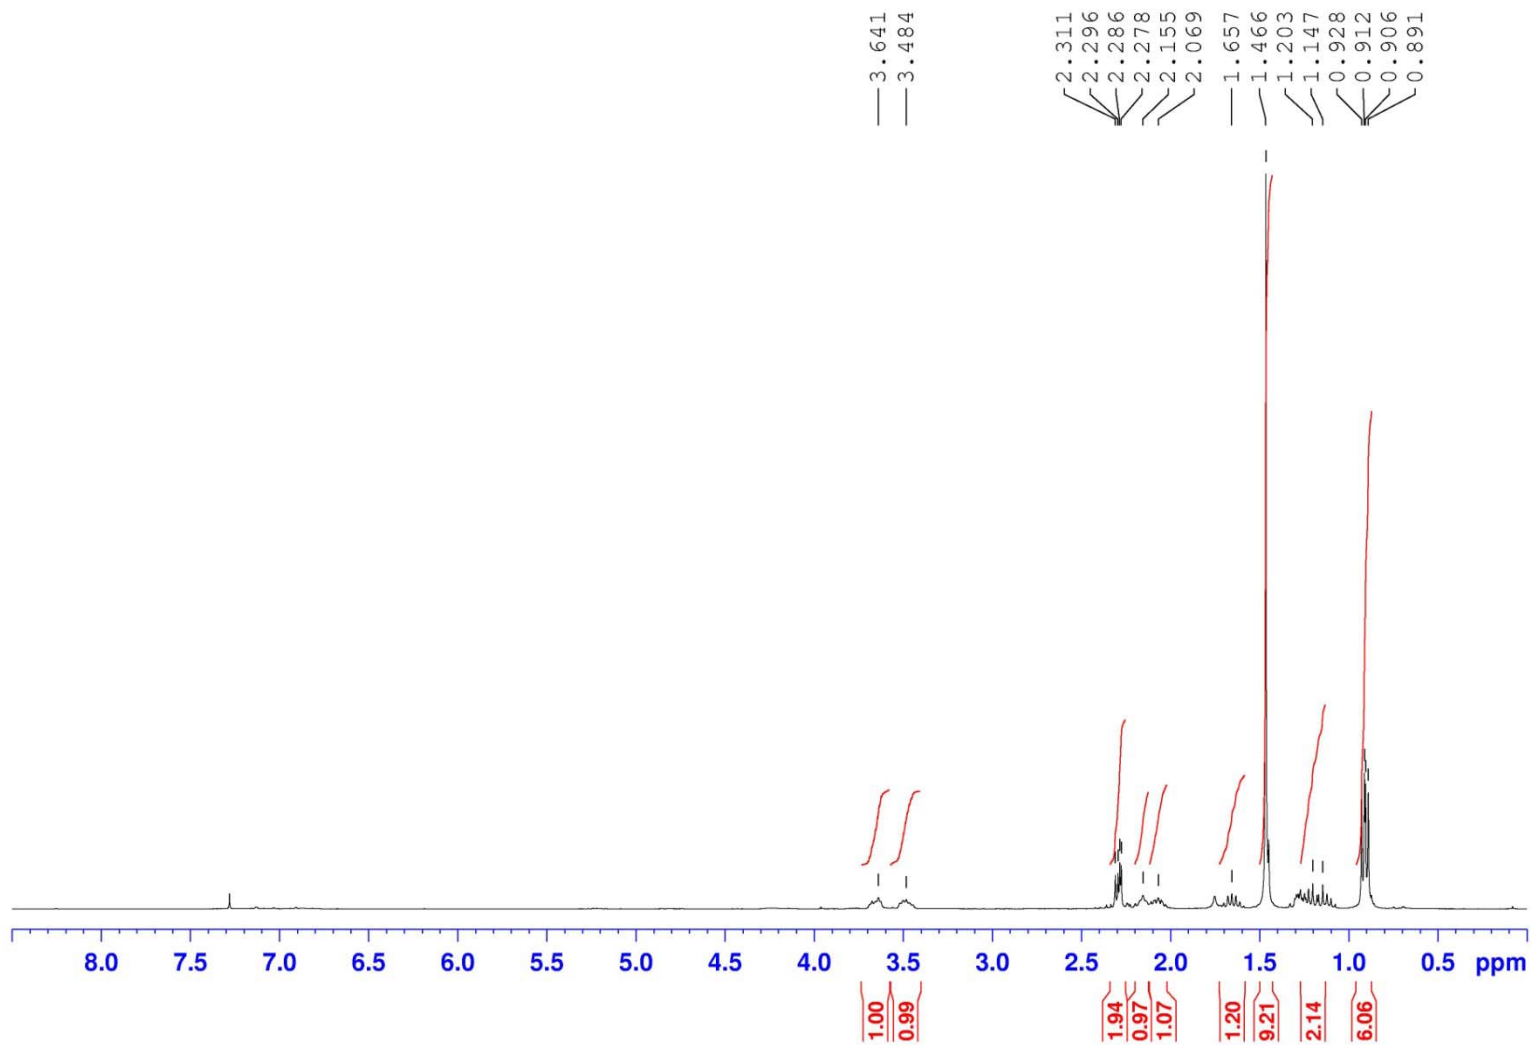

**<sup>13</sup>C NMR of (R)-19**

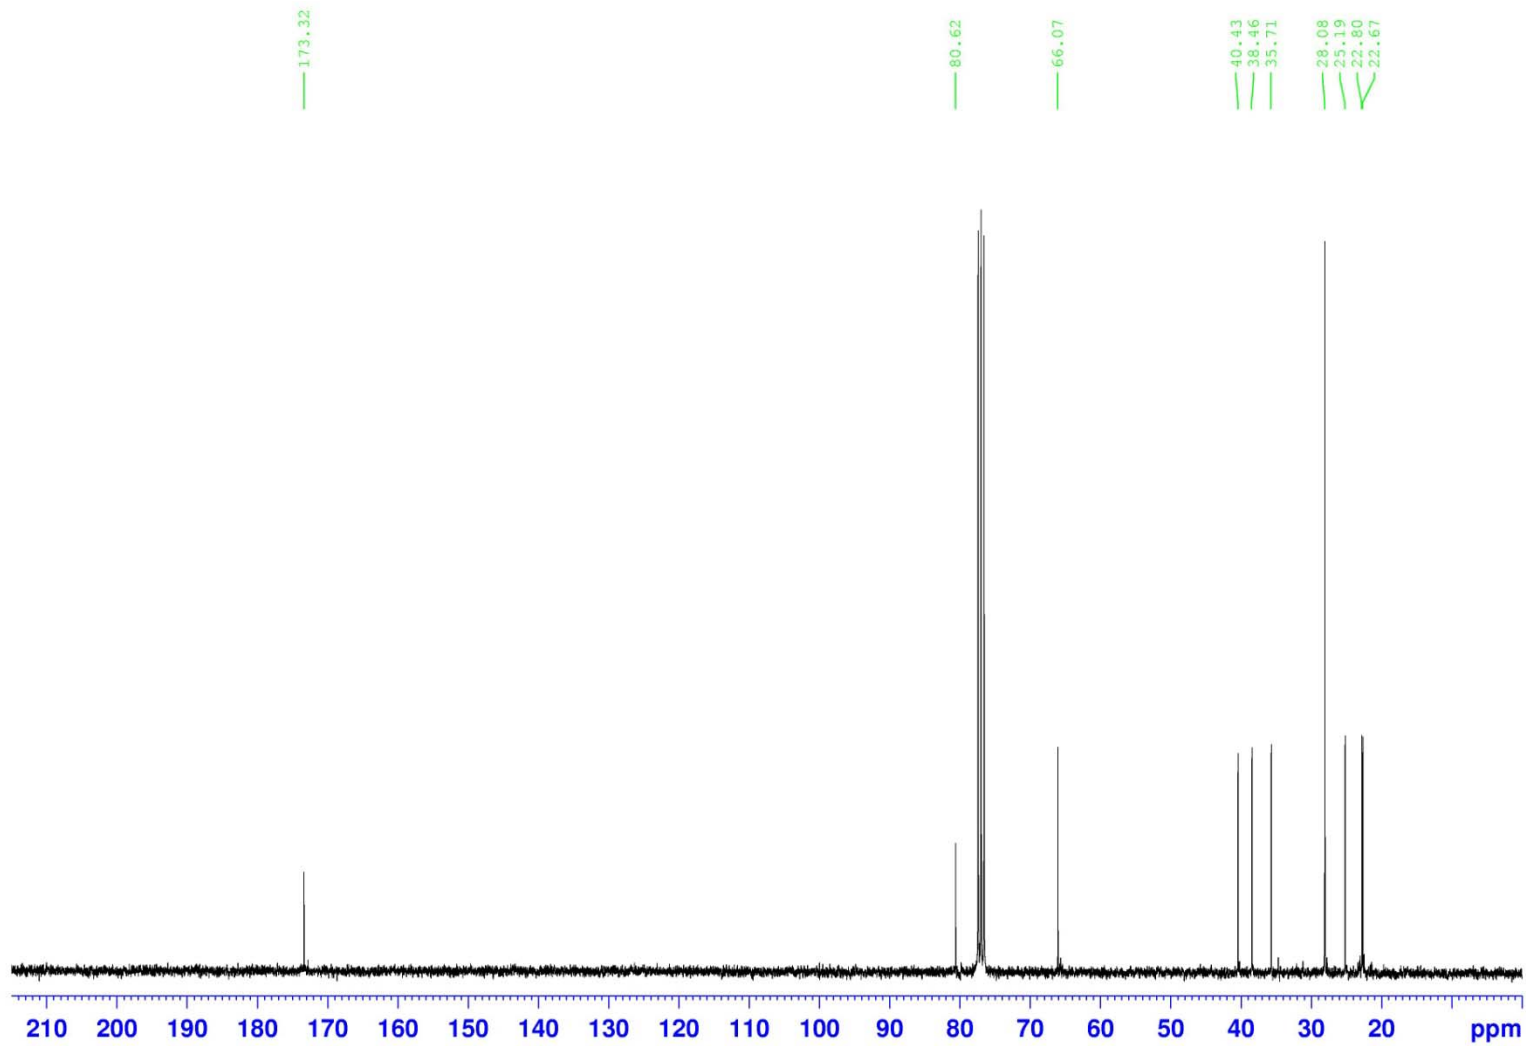



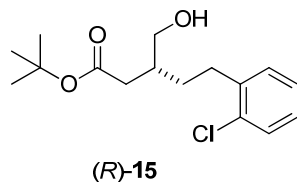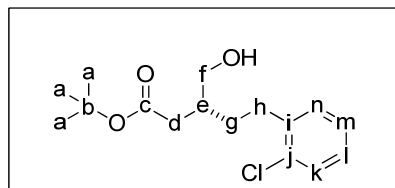

Following the general procedure for CAHB-oxidation of **12** with NaBO<sub>3</sub> affords, after flash chromatography on silica gel (80–70:20–30 hexanes:dichloromethane), the title compound (73%) as a light yellow oil.

|                                                      |                                                                                                                                                                                                                                                  |
|------------------------------------------------------|--------------------------------------------------------------------------------------------------------------------------------------------------------------------------------------------------------------------------------------------------|
| <b>Optical rotation</b>                              | $[\alpha]_{\text{D}}^{20} = +4.5^{\circ}$ ( <i>c</i> 0.5, CHCl <sub>3</sub> )                                                                                                                                                                    |
| <b>TLC analysis</b>                                  | <i>R<sub>f</sub></i> 0.6 (50:50 hexanes:dichloromethane)                                                                                                                                                                                         |
| <b><sup>1</sup>H NMR (300 MHz, CDCl<sub>3</sub>)</b> | δ 7.40–7.30 (1H, m, k), 7.25–7.10 (3H, m, l,m,n), 3.80–3.65 (1H, m, f), 3.65–3.55 (1H, m, f), 2.78 (2H, t, <i>J</i> = 8.2 Hz, h), 2.45–2.35 (2H, m, d), 2.29 (1H, br s, OH), 2.15–2.00 (1H, m, e), 1.80–1.60 (2H, m, g), 1.47 (9H, s, a,a',a''). |
| <b><sup>13</sup>C NMR (75 MHz, CDCl<sub>3</sub>)</b> | δ 173.04 (c), 139.69 (i), 133.79 (j), 130.27 (k), 129.49 (l), 127.38 (m), 126.85 (n), 80.76 (b), 65.49 (f), 38.03 (d), 37.78 (e), 31.30 (h), 31.03 (g), 28.09 (a,a',a'').                                                                        |
| <b>IR (neat)</b>                                     | 3437 (O-H stretch), 2930, 1720 (C=O stretch), 1474, 1456, 1367 (C- O stretch), 1148, 1051, 909, 751, 732 cm <sup>-1</sup> .                                                                                                                      |
| <b>HRMS (EI)</b>                                     | Calcd. for C <sub>16</sub> H <sub>23</sub> ClNaO <sub>3</sub> (M+Na): 321.1233, found 321.1237 <i>m/z</i> .                                                                                                                                      |

**<sup>1</sup>H NMR of (R)-15**

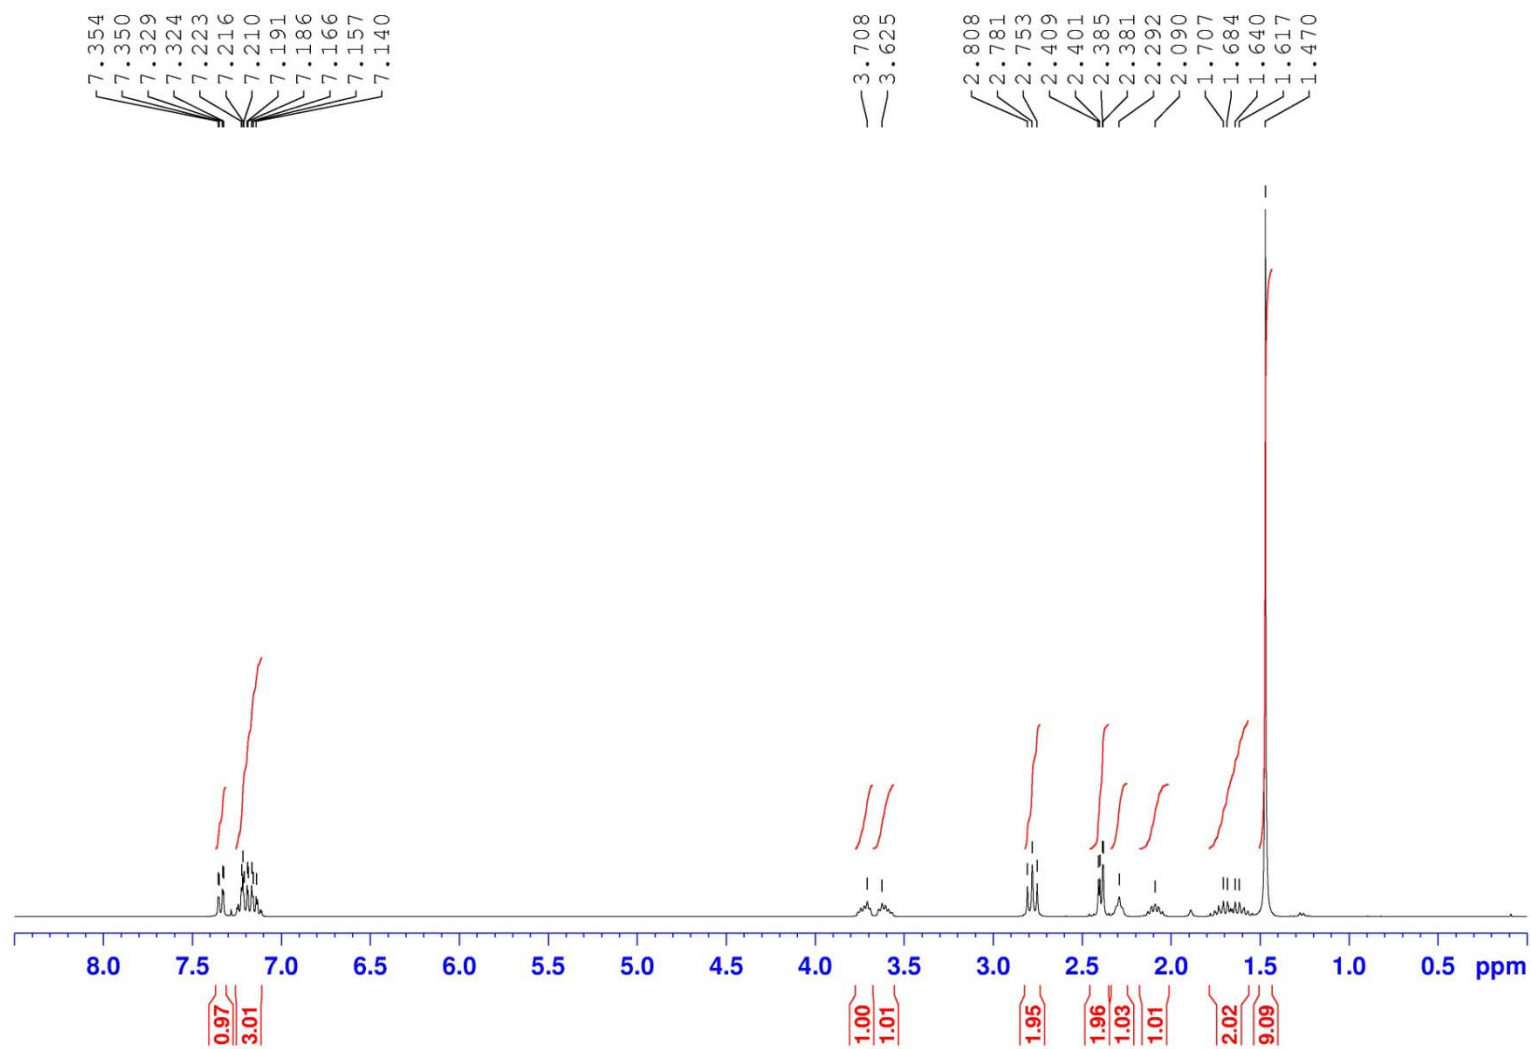

**$^{13}\text{C}$  NMR of (*R*)-15**

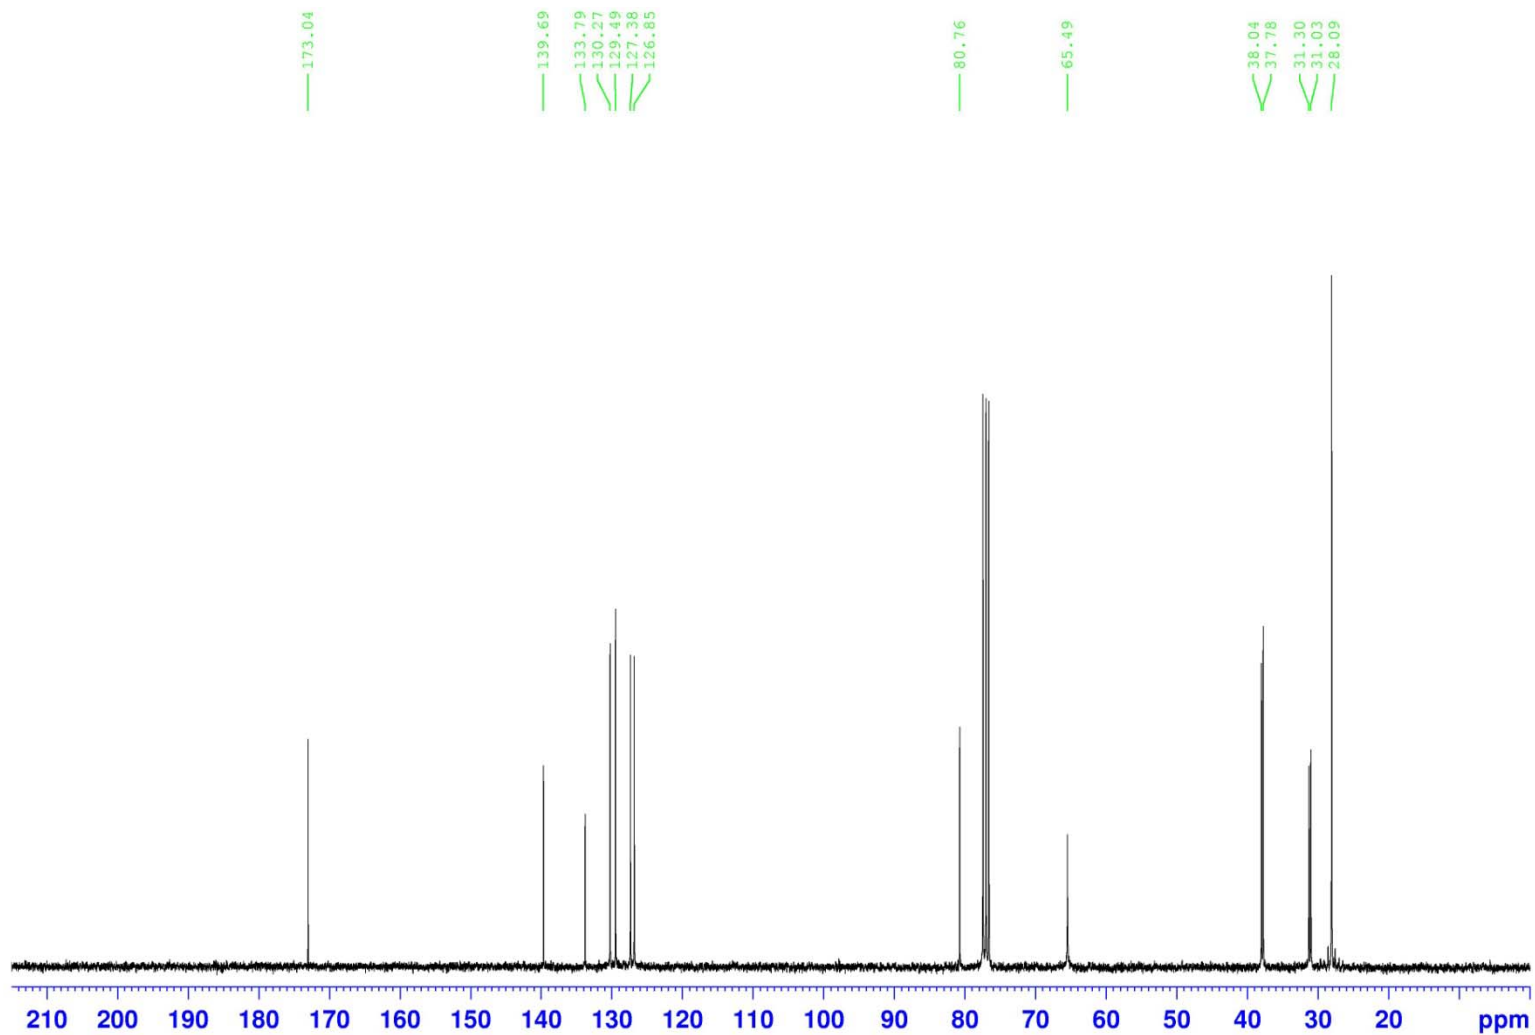

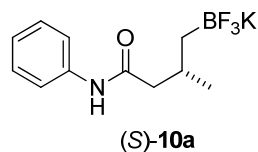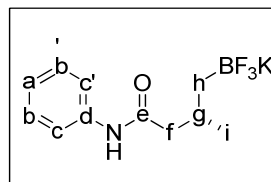

Following the general procedure for the preparation of trifluoroborate salts with (S)-8a affords the title compound (65%) as a white solid.

|                                          |                                                                                                                                                                                                                |
|------------------------------------------|----------------------------------------------------------------------------------------------------------------------------------------------------------------------------------------------------------------|
| <b>m.p.</b>                              | 176.5–177.5 °C                                                                                                                                                                                                 |
| <b>Optical rotation</b>                  | $[\alpha]_D^{20} = +5.7^\circ$ (c 0.5, MeOH)                                                                                                                                                                   |
| <b><sup>1</sup>H NMR (300 MHz, MeOD)</b> | $\delta$ 7.55 (2H, d, $J = 7.8$ Hz, c,c'), 7.29 (2H, t, $J = 7.6$ Hz, b,b'), 7.07 (1H, t, $J = 7.3$ Hz, a), 2.55–2.40 (1H, m, f), 2.20–2.00 (2H, m, f,g), 1.01 (3H, d, $J = 5.7$ Hz, i), 0.45–0.20 (2H, m, h). |
| <b><sup>13</sup>C NMR (75 MHz, MeOD)</b> | $\delta$ 174.37 (e), 138.61 (d), 128.27 (b,b'), 123.51 (a), 119.96 (c,c'), 28.54 (g), 25.92 (h), and 22.02 (i)                                                                                                 |
| <b>IR (neat)</b>                         | 3129 (N-H bend), 2975, 2898, 1728 (C=O stretch), 1545 (N-H bend), 1390, 1369, 1267 (C-N stretch), 1152, 1086, 960, 777 $\text{cm}^{-1}$ .                                                                      |
| <b>HRMS (CI)</b>                         | Calcd. for C <sub>11</sub> H <sub>15</sub> NO (M+H-BF <sub>3</sub> K): 177.1153, found 177.1148 $m/z$ .                                                                                                        |

**<sup>1</sup>H NMR of (S)-10a**

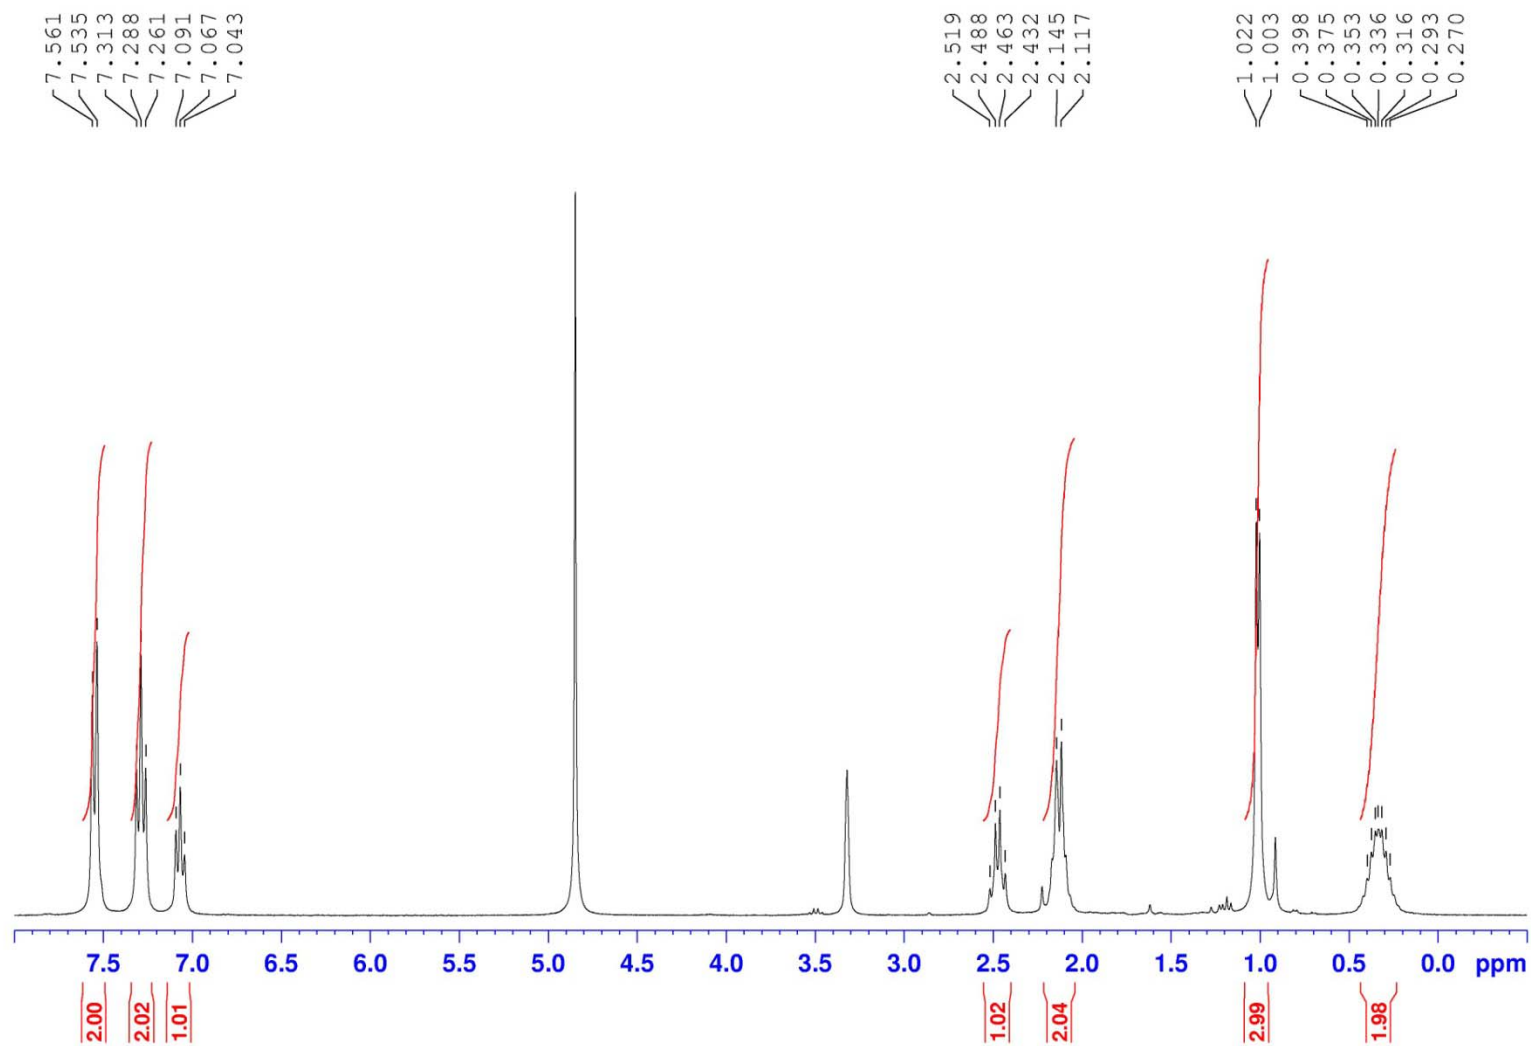

**<sup>13</sup>C NMR of (*S*)-10a**

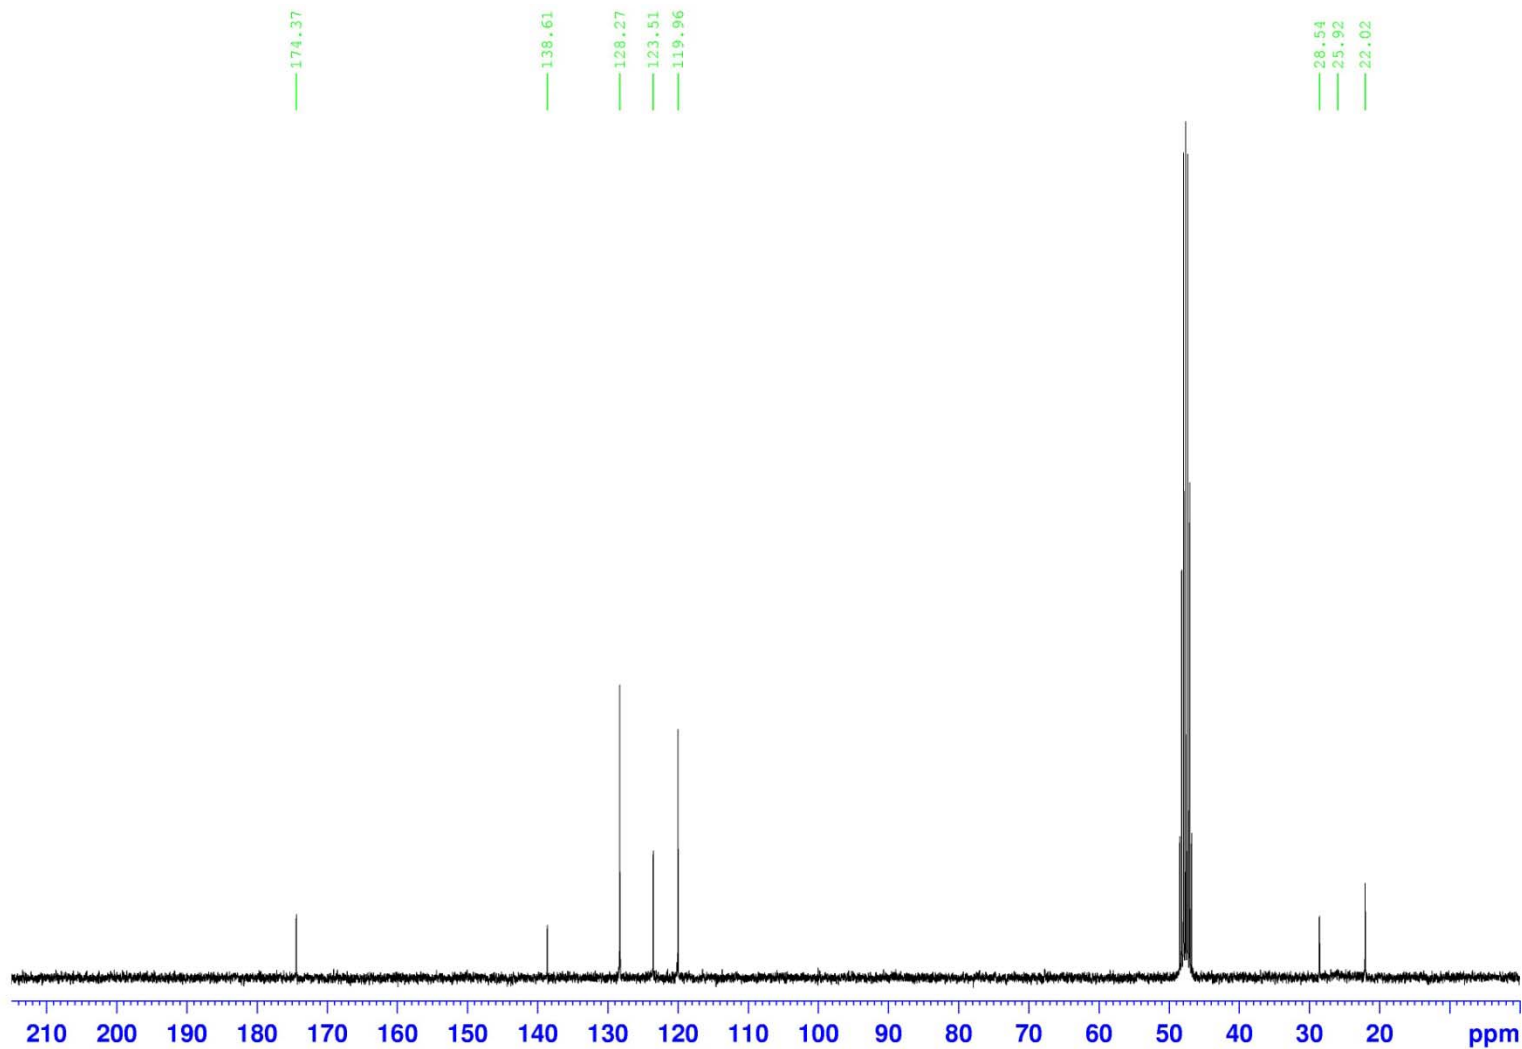

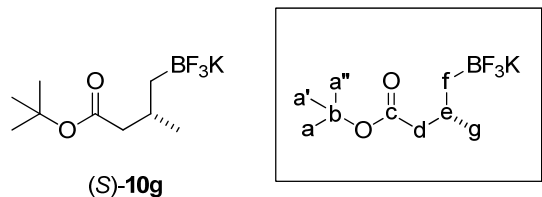

Following the general procedure for the preparation of trifluoroborate salts with (S)-**8g** affords the title compound (62%) as a white solid.

|                                           |                                                                                                                                                                                                              |
|-------------------------------------------|--------------------------------------------------------------------------------------------------------------------------------------------------------------------------------------------------------------|
| <b>m.p.</b>                               | 176.0–178.0 °C                                                                                                                                                                                               |
| <b>Optical rotation</b>                   | $[\alpha]_D^{20} = +6.4^\circ$ ( <i>c</i> 0.5, MeOH)                                                                                                                                                         |
| <b><sup>1</sup>H NMR (400 MHz, MeOD)</b>  | $\delta$ 2.35 (1H, dd, <i>J</i> = 13.7 Hz, 5.2 Hz, d), 2.05–1.95 (1H, m, e), 1.91 (1H, dd, <i>J</i> = 13.7 Hz, 8.9 Hz, d), 1.46 (9H, s, a,a',a''), 0.94 (3H, d, <i>J</i> = 6.5 Hz, g), 0.35–0.15 (2H, m, f). |
| <b><sup>13</sup>C NMR (100 MHz, MeOD)</b> | $\delta$ 174.97 (c), 79.46 (b), 45.73 (d), 27.88 (e), 27.05 (a,a',a''), 21.84 (g).                                                                                                                           |
| <b>IR (neat)</b>                          | 2983, 1727 (C=O stretch), 1457, 1368 (C-O stretch), 1274, 1152, 1099, 956, 918, 842, 769 cm <sup>-1</sup> .                                                                                                  |
| <b>HRMS (CI)</b>                          | Calcd. for C <sub>9</sub> H <sub>17</sub> O <sub>2</sub> (M-BF <sub>3</sub> K): 147.1214, found 147.1215 <i>m/z</i> .                                                                                        |

**<sup>1</sup>H NMR of (S)-10g**

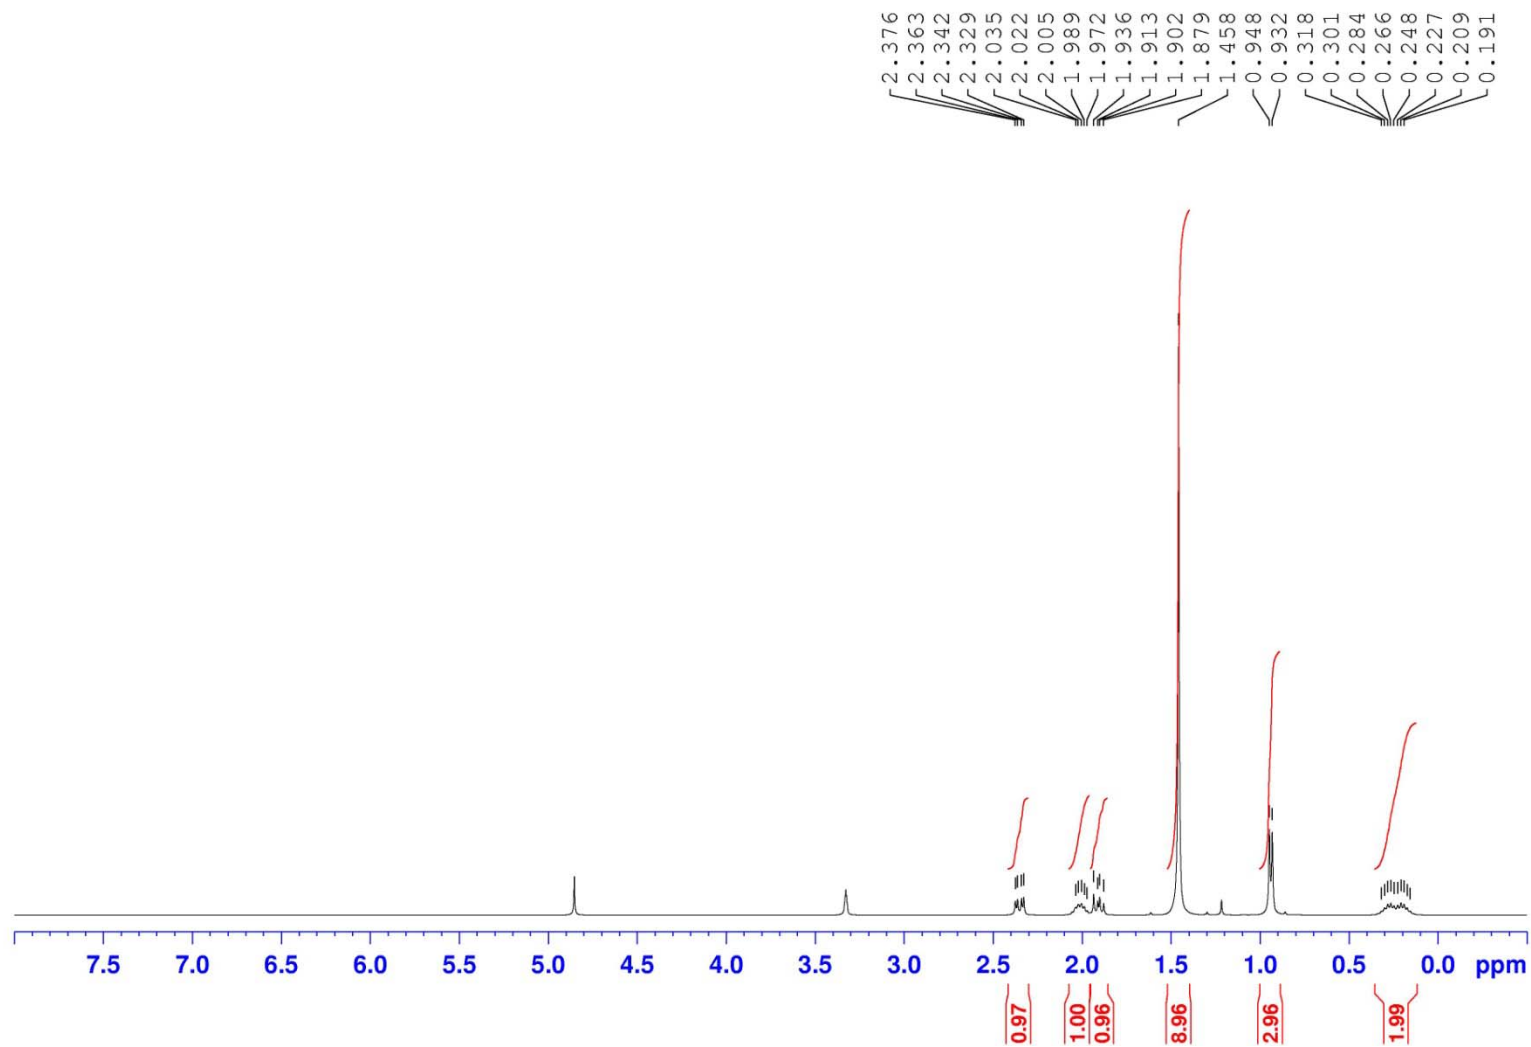



<sup>13</sup>C NMR of (*S*)-10g

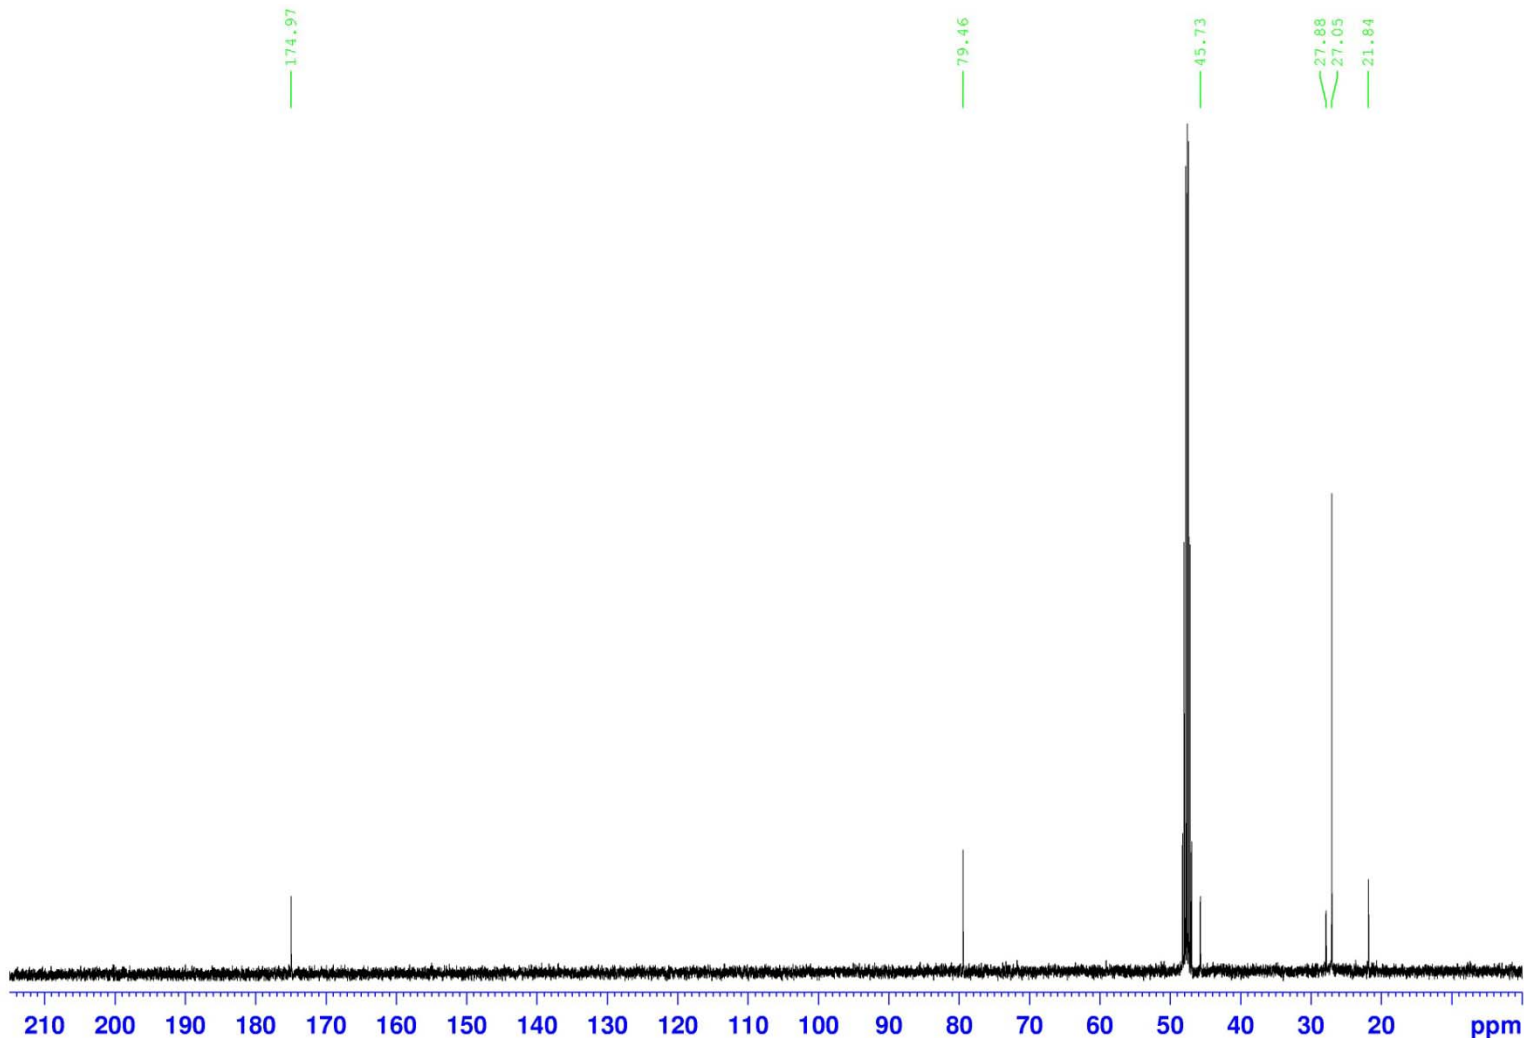

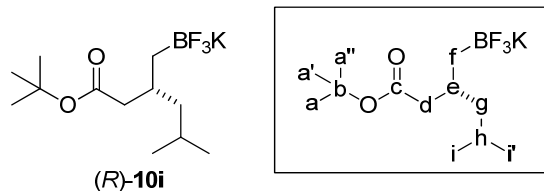

Following the general procedure for the preparation of trifluoroborate salts with (R)-8i affords the title compound (75%) as a white solid.

|                                           |                                                                                                                                                                                                                                     |
|-------------------------------------------|-------------------------------------------------------------------------------------------------------------------------------------------------------------------------------------------------------------------------------------|
| <b>m.p.</b>                               | 179.0–179.5 °C                                                                                                                                                                                                                      |
| <b>Optical rotation</b>                   | $[\alpha]_{\text{D}}^{20} = +9.7^{\circ}$ ( <i>c</i> 0.5, MeOH)                                                                                                                                                                     |
| <b><sup>1</sup>H NMR (400 MHz, MeOD)</b>  | $\delta$ 2.50–2.40 (1H, m, d), 2.05–1.95 (2H, m, d,e), 1.75–1.65 (1H, m, h), 1.46 (9H, s, a,a',a''), 1.25–1.15 (1H, m, g), 1.15–1.00 (1H, m, g), 0.88 (6H, t, <i>J</i> = 6.1 Hz, i,i'), 0.40–0.35 (1H, m, f), 0.15–0.05 (1H, m, f). |
| <b><sup>13</sup>C NMR (100 MHz, MeOD)</b> | $\delta$ 175.30 (c), 79.38 (b), 46.83 (g), 43.06 (d), 30.23 (e), 27.07 (a,a',a''), 24.99 (h), 22.41 and 21.64 (i,i').                                                                                                               |
| <b>IR (neat)</b>                          | 2953, 2906, 1728 (C=O stretch), 1392, 1367 (C-O stretch), 1256, 1125, 1069, 974, 908, 759 cm <sup>-1</sup> .                                                                                                                        |
| <b>HRMS (CI)</b>                          | Calcd. for C <sub>12</sub> H <sub>23</sub> O <sub>2</sub> (M-BF <sub>3</sub> K): 199.1698, found 199.1510 <i>m/z</i> .                                                                                                              |

**<sup>1</sup>H NMR of (R)-10i**

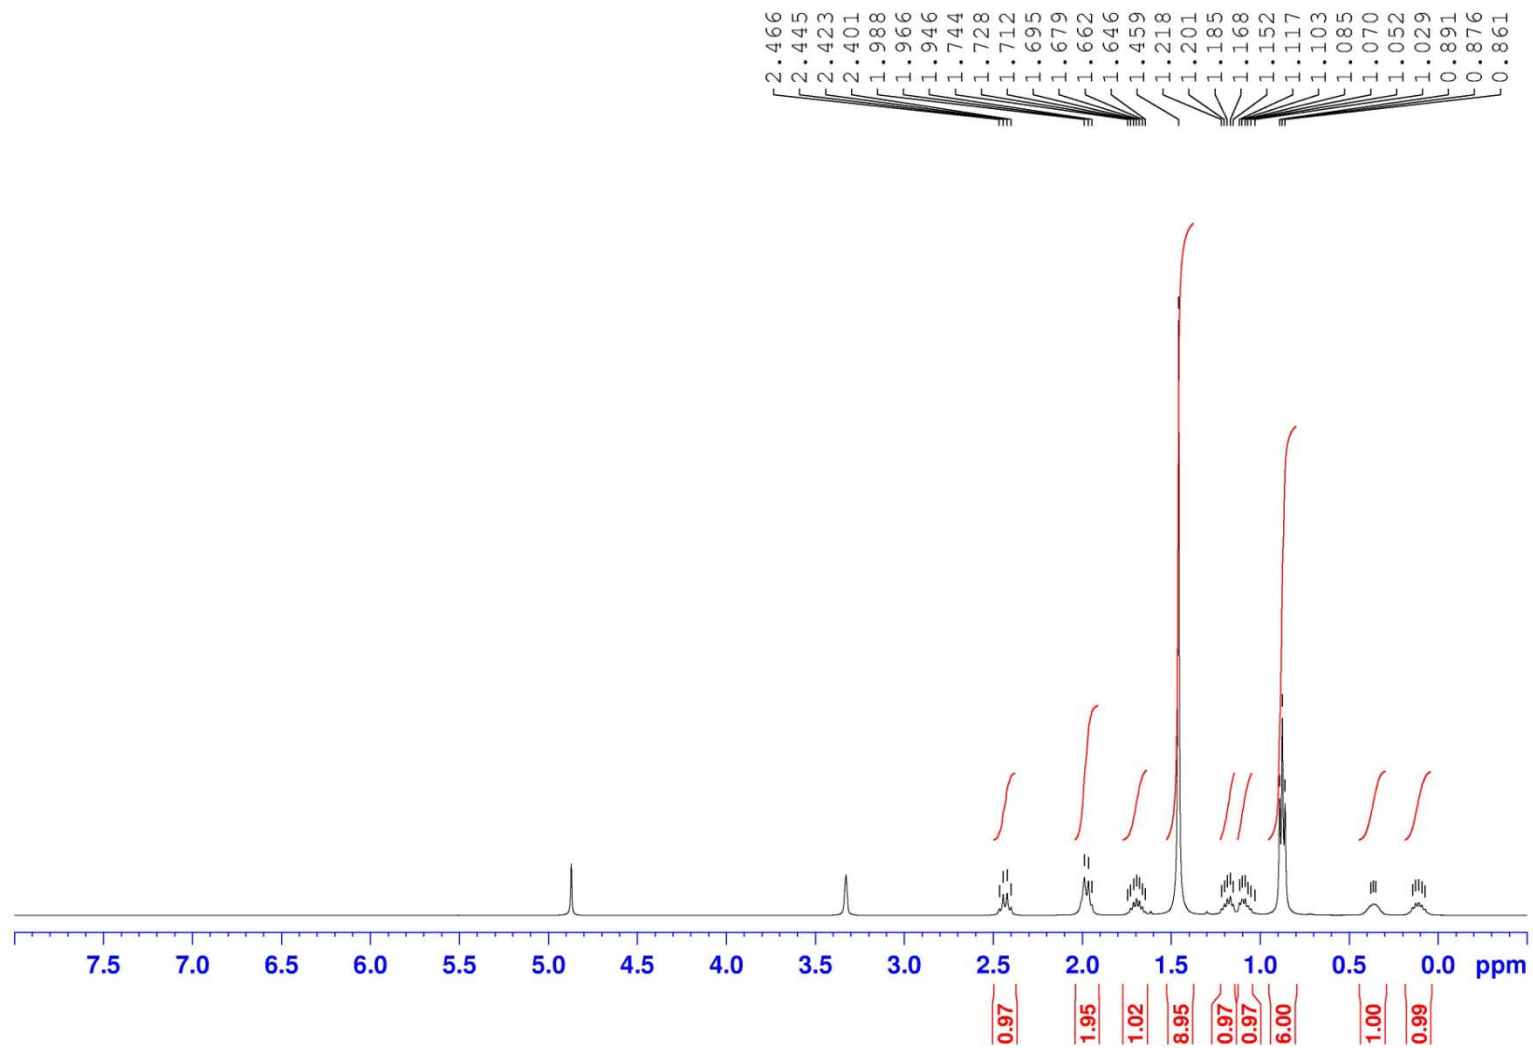

**<sup>13</sup>C NMR of (R)-10i**

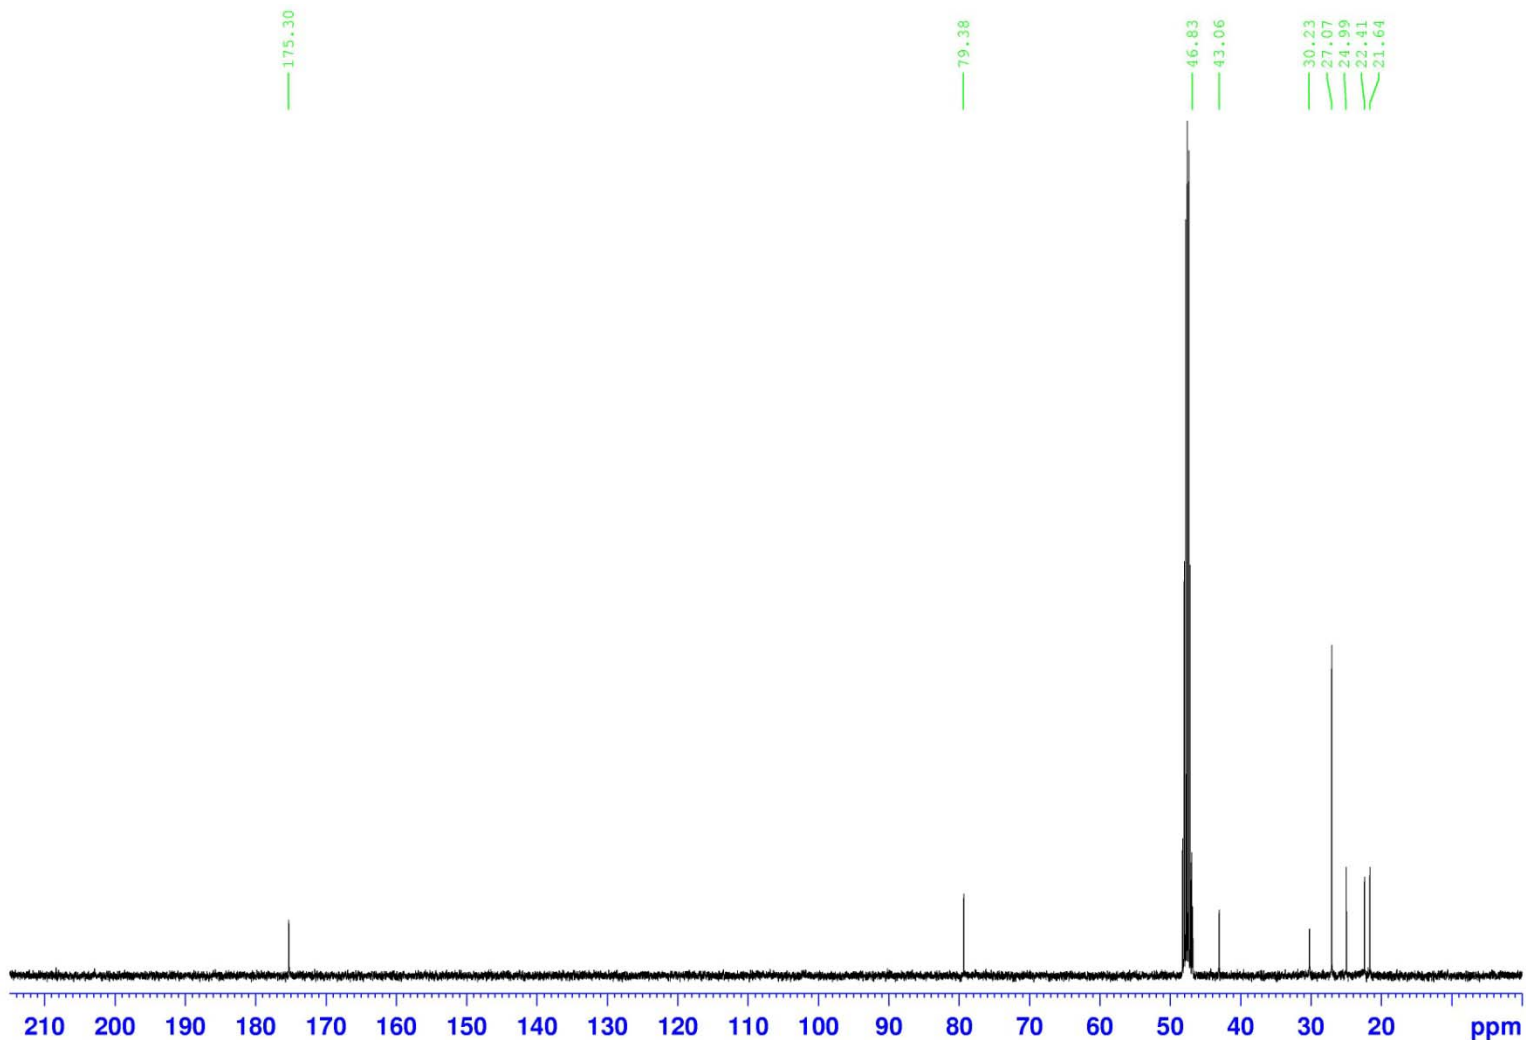

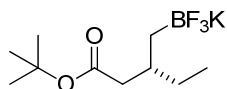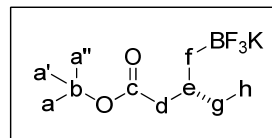

(*R*)-**10h**

Following the general procedure for the preparation of trifluoroborate salts with (*R*)-**8h** affords the title compound (62%) as a white solid.

|                                          |                                                                                                                                                                                                                                                                          |
|------------------------------------------|--------------------------------------------------------------------------------------------------------------------------------------------------------------------------------------------------------------------------------------------------------------------------|
| <b>m.p.</b>                              | 174.5–176.0 °C                                                                                                                                                                                                                                                           |
| <b>Optical rotation</b>                  | $[\alpha]_{\text{D}}^{20} = +6.3^{\circ}$ ( <i>c</i> 0.5, MeOH)                                                                                                                                                                                                          |
| <b><sup>1</sup>H NMR (300 MHz, MeOD)</b> | $\delta$ 2.37 (1H, dd, <i>J</i> = 14.2 Hz, 5.6 Hz, d), 2.03 (1H, dd, <i>J</i> = 14.2 Hz, 8.6 Hz, d), 1.95–1.80 (1H, m, e), 1.45 (9H, s, a, a', a''), 1.34 (2H, t, <i>J</i> = 6.9 Hz, g), 0.87 (3H, t, <i>J</i> = 7.4 Hz, h), 0.40–0.25 (1H, m, f), 0.20–0.10 (1H, m, f). |
| <b><sup>13</sup>C NMR (75 MHz, MeOD)</b> | $\delta$ 175.31 (c), 79.39 (b), 42.23 (d), 33.95 (e), 28.79 (g), 27.05 (a, a', a''), 22.69 (f), 9.96 (h).                                                                                                                                                                |
| <b>IR (neat)</b>                         | 2983, 1728 (C=O stretch), 1499, 1329 (C-O stretch), 1080, 1029, 966, 915, 751 cm <sup>-1</sup> .                                                                                                                                                                         |
| <b>HRMS (FAB)</b>                        | Calcd. for C <sub>10</sub> H <sub>19</sub> O <sub>2</sub> (M-BF <sub>3</sub> K): 171.1386, found 171.1185 <i>m/z</i> .                                                                                                                                                   |

**<sup>1</sup>H NMR of (*R*)-10h**

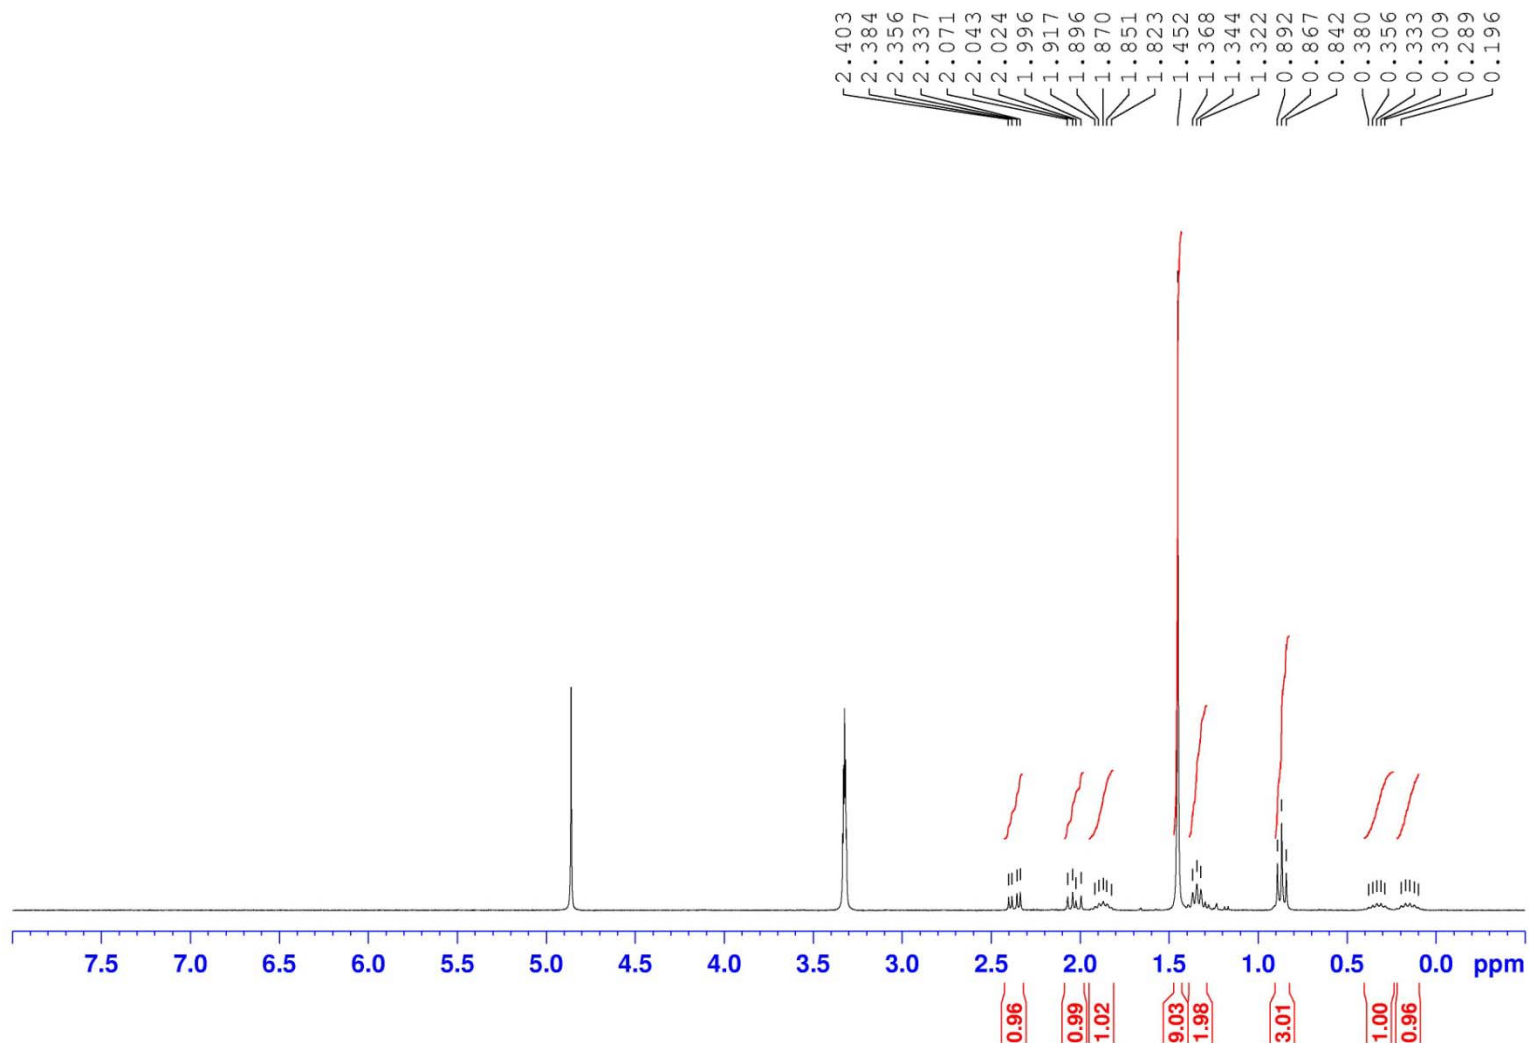

<sup>13</sup>C NMR of (*R*)-10h

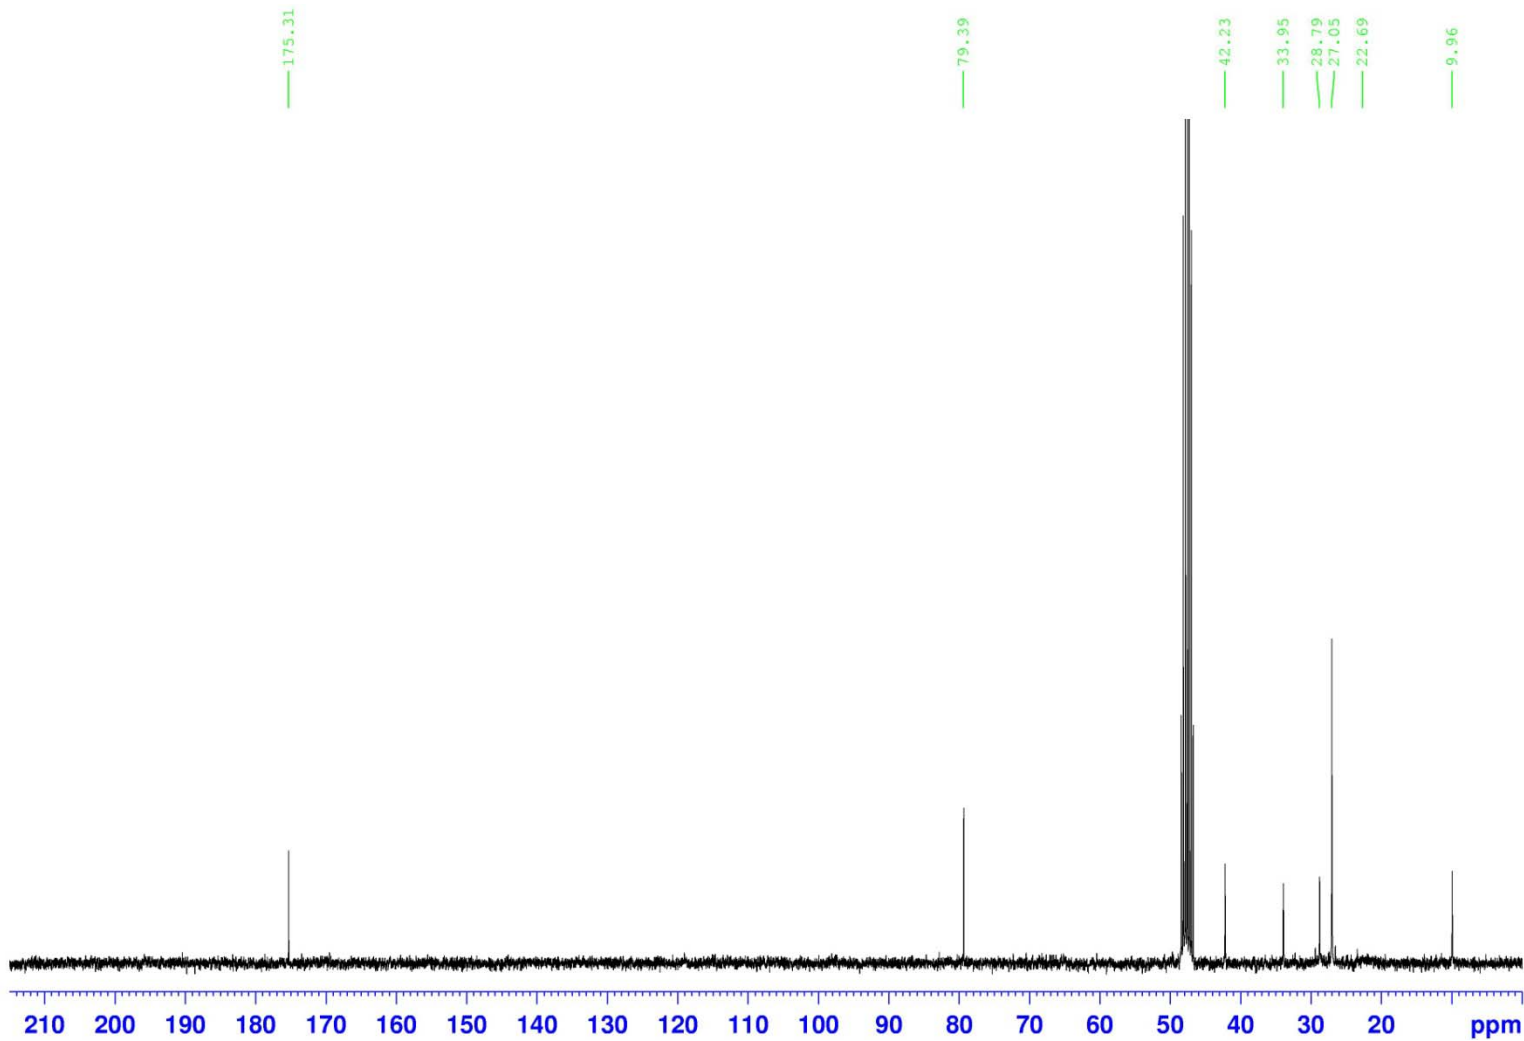

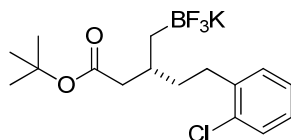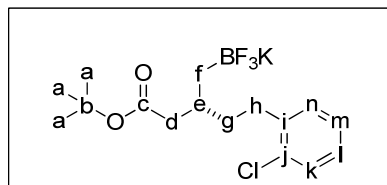

Following the general procedure for the preparation of trifluoroborate salts with (*R*)-**13** affords the title compound (76%) as a white solid.

|                                          |                                                                                                                                                                                                                                                |
|------------------------------------------|------------------------------------------------------------------------------------------------------------------------------------------------------------------------------------------------------------------------------------------------|
| <b>m.p.</b>                              | 174.6–175.6 °C                                                                                                                                                                                                                                 |
| <b>Optical rotation</b>                  | $[\alpha]_{\text{D}}^{20} = +6.9^{\circ}$ ( <i>c</i> 0.5, MeOH)                                                                                                                                                                                |
| <b><sup>1</sup>H NMR (300 MHz, MeOD)</b> | $\delta$ 7.35–7.25 (2H, m, l,m), 7.25–7.05 (2H, m, j,k), 2.85–2.60 (2H, m, h), 2.50 (1H, dd, <i>J</i> = 13.4 Hz, 4,3 Hz, d), 2.20–1.95 (2H, m, d,e), 1.70–1.50 (2H, m, g), 1.43 (9H, s, a,a',a''), 0.55–0.40 (1H, m, f), 0.35–0.15 (1H, m, f). |
| <b><sup>13</sup>C NMR (75 MHz, MeOD)</b> | $\delta$ 174.97 (c), 141.01 (i), 133.35 (n), 130.27 (m), 128.81 (l), 126.63 (j), 126.46 (k), 79.48 (b), 42.68 (d), 36.78 (g), 32.50 and 32.47 (e), 30.41 (h), 27.02 (a,a',a'').                                                                |
| <b>IR (neat)</b>                         | 2978, 2922, 1703 (C=O stretch), 1474, 1391, 1310 (C-O stretch), 1260, 1030, 967, 953, 841, 777 cm <sup>-1</sup> .                                                                                                                              |
| <b>HRMS (FAB)</b>                        | Calcd. for C <sub>16</sub> H <sub>22</sub> ClO <sub>2</sub> (M-BF <sub>3</sub> K): 281.1308, found 281.1312 <i>m/z</i> .                                                                                                                       |



**<sup>1</sup>H NMR of (*R*)-5-(2-chlorophenyl)-3-(trifluoroboratomethyl)pentanoic acid *tert*-butyl ester potassium salt**

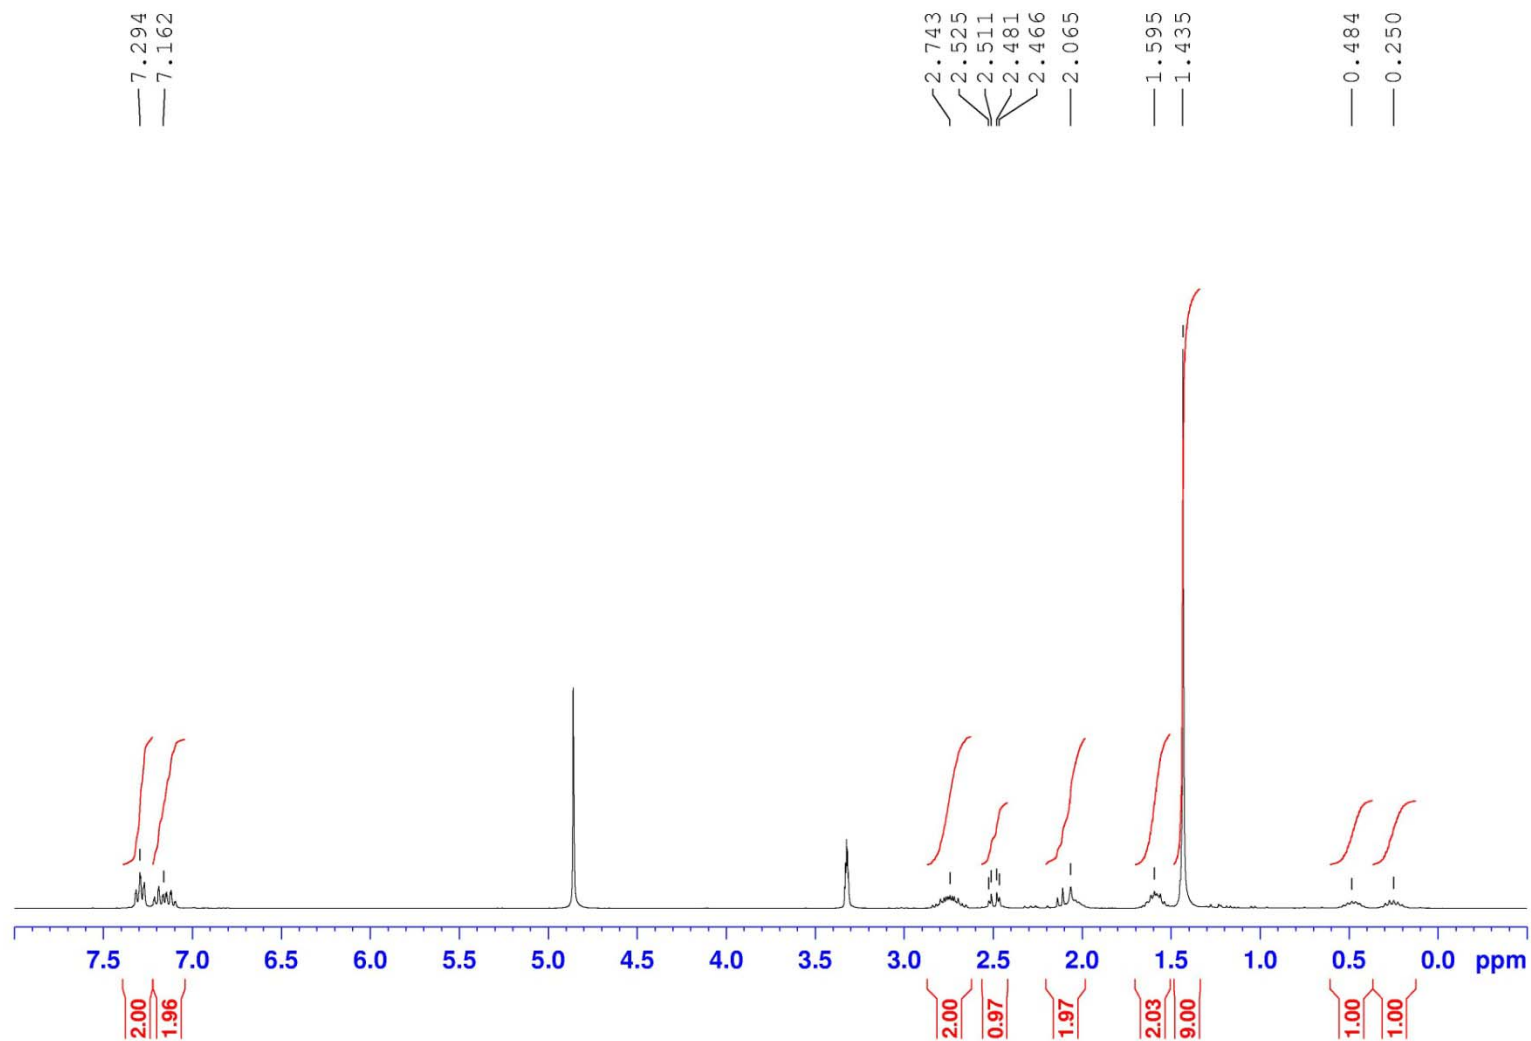

**$^{13}\text{C}$  NMR of (*R*)-5-(2-chlorophenyl)-3-(trifluoroboratomethyl)pentanoic acid *tert*-butyl ester potassium salt**

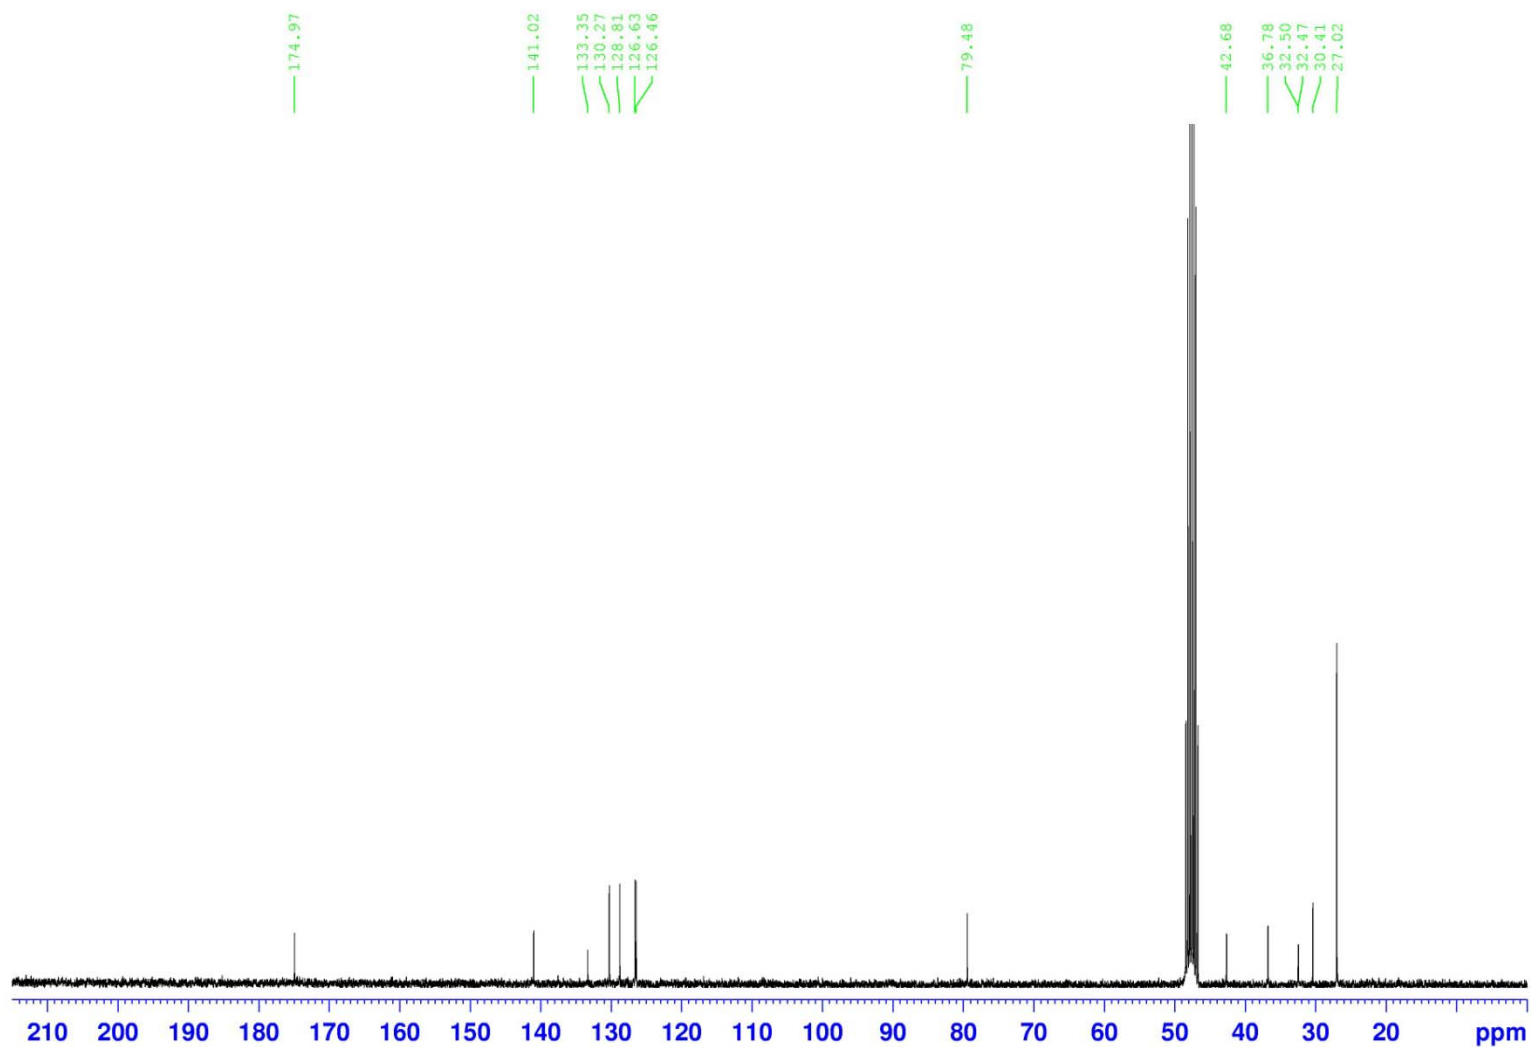

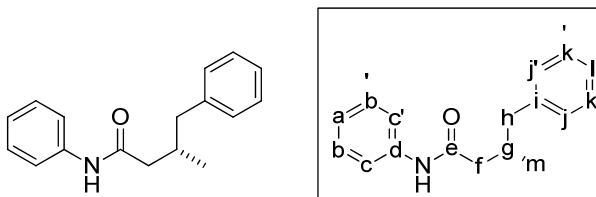

Following the general procedure for the palladium catalyzed C-C cross-coupling of trifluoroborate salts with (*S*)-**10a** affords, after flash chromatography on silica gel (75:25 hexanes:ethyl acetate), the title compound (81%) as a white solid.

|                                                      |                                                                                                                                                                                                                                                                                                                     |
|------------------------------------------------------|---------------------------------------------------------------------------------------------------------------------------------------------------------------------------------------------------------------------------------------------------------------------------------------------------------------------|
| <b>m.p.</b>                                          | 59–60.5 °C                                                                                                                                                                                                                                                                                                          |
| <b>Optical rotation</b>                              | $[\alpha]_{\text{D}}^{20} = +6.5^{\circ}$ ( <i>c</i> 0.5, CHCl <sub>3</sub> )                                                                                                                                                                                                                                       |
| <b>TLC analysis</b>                                  | <i>R<sub>f</sub></i> 0.4 (80:20 hexanes:ethyl acetate)                                                                                                                                                                                                                                                              |
| <b><sup>1</sup>H NMR (300 MHz, CDCl<sub>3</sub>)</b> | δ 7.52 (2H, d, <i>J</i> = 8.0 Hz, c,c'), 7.40–7.25 (4H, m, j,j',k,k'), 7.25–7.15 (3H, m, b,b',l), 7.12 (1H, t, <i>J</i> = 6.9 Hz, a), 2.72 (1H, dd, <i>J</i> = 13.2 Hz, 6.4 Hz, h), 2.58 (1H, dd, <i>J</i> = 13.2 Hz, 6.8 Hz, h), 2.50–2.35 (2H, m, f,g), 2.20–2.05 (1H, m, f), 1.04 (3H, d, <i>J</i> = 6.2 Hz, m). |
| <b><sup>13</sup>C NMR (75 MHz, CDCl<sub>3</sub>)</b> | δ 170.54 (e), 140.18 (i), 137.83 (d), 129.27 (b,b'), 129.01 (j,j'), 128.33 (k,k'), 126.11 (l), 124.24 (a), 119.78 (c,c'), 44.50 (h), 43.09 (f), 32.67 (g), 19.69 (m).                                                                                                                                               |
| <b>IR (neat)</b>                                     | 3292 (N-H stretch), 3062, 2924, 1657 (C=O stretch), 1600, 1544 (N-H bend), 1498, 1442, 1397, 1097 (C-N stretch), 1050, 754 cm <sup>-1</sup> .                                                                                                                                                                       |
| <b>HRMS (EI)</b>                                     | Calcd. for C <sub>17</sub> H <sub>19</sub> NO: 253.1467, found 253.1474 <i>m/z</i> .                                                                                                                                                                                                                                |

**<sup>1</sup>H NMR of (S)-3-methyl-4-phenylbutanoic acid phenyl amide**

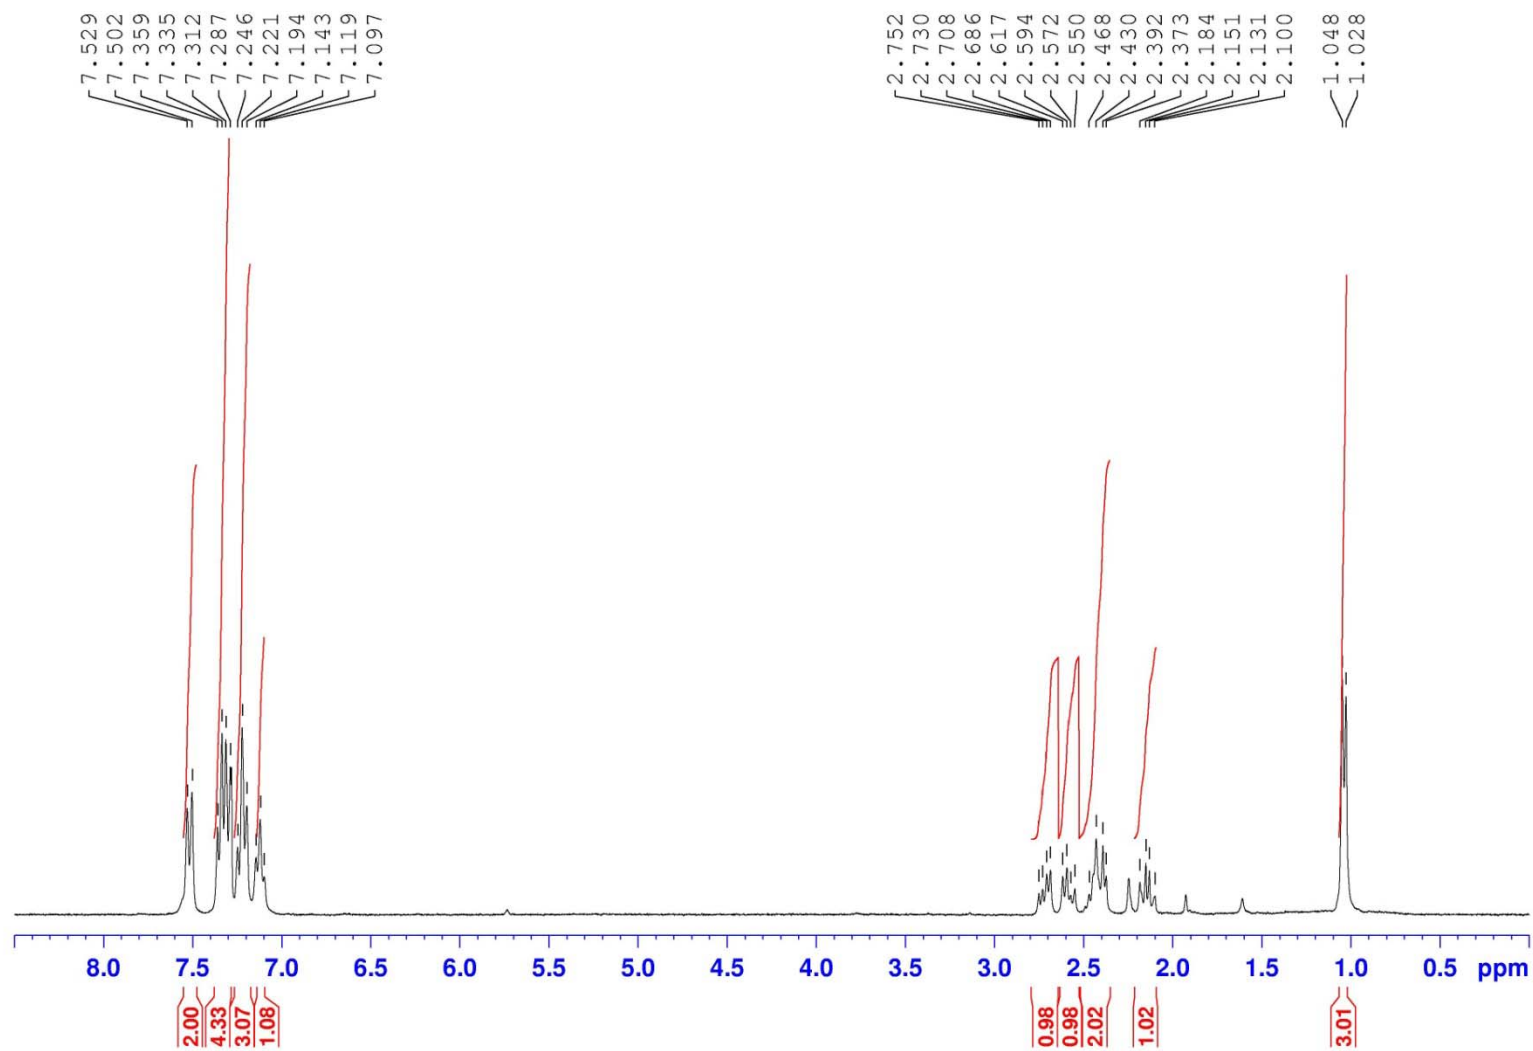

**$^{13}\text{C}$  NMR of (*S*)-3-methyl-4-phenylbutanoic acid phenyl amide**

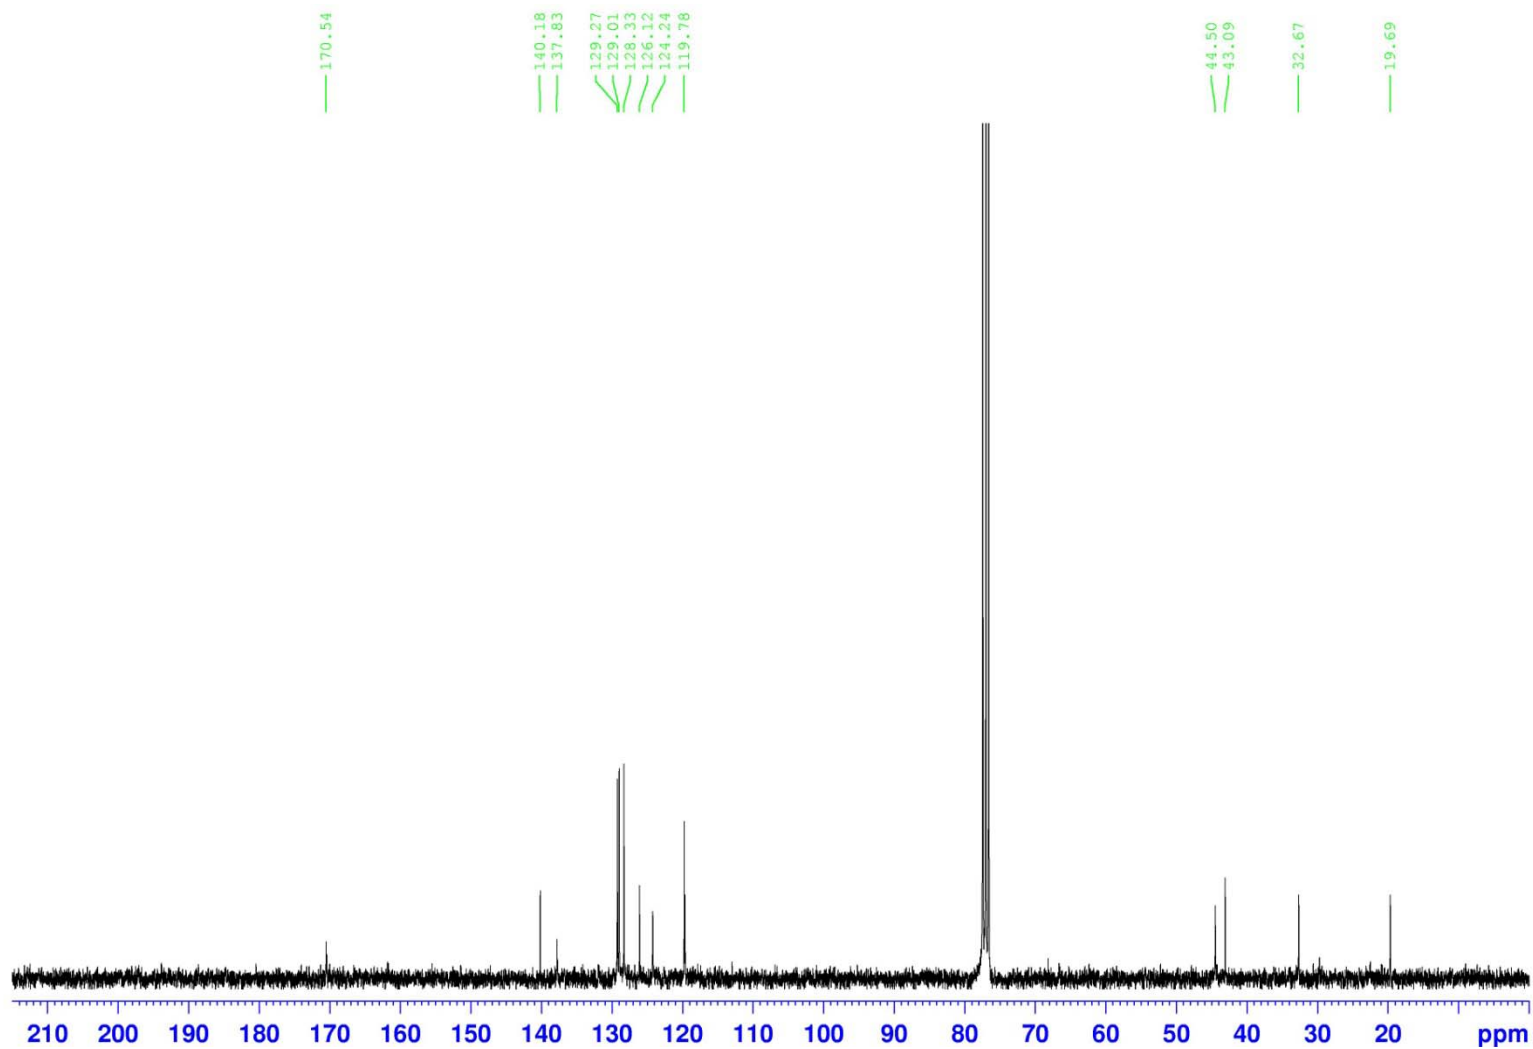

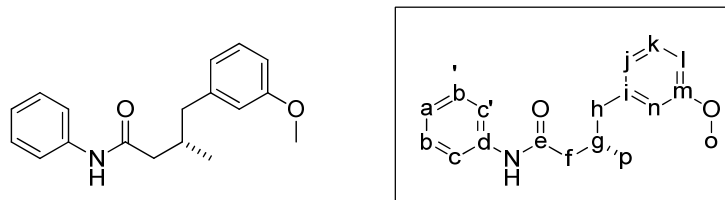

Following the general procedure for the palladium catalyzed C-C cross-coupling of trifluoroborate salts with (*S*)-**10a** affords, after flash chromatography on silica gel (75:25 hexanes:ethyl acetate), the title compound (71%) as a white solid.

|                                                      |                                                                                                                                                                                                                                                                                                                                                                              |
|------------------------------------------------------|------------------------------------------------------------------------------------------------------------------------------------------------------------------------------------------------------------------------------------------------------------------------------------------------------------------------------------------------------------------------------|
| <b>m.p.</b>                                          | 65–66 °C                                                                                                                                                                                                                                                                                                                                                                     |
| <b>Optical rotation</b>                              | $[\alpha]_{\text{D}}^{20} = +2.9^{\circ}$ ( <i>c</i> 0.5, CHCl <sub>3</sub> )                                                                                                                                                                                                                                                                                                |
| <b>TLC analysis</b>                                  | 0.40 (80:20 hexanes:ethyl acetate)                                                                                                                                                                                                                                                                                                                                           |
| <b><sup>1</sup>H NMR (300 MHz, CDCl<sub>3</sub>)</b> | $\delta$ 7.52 (2H, d, <i>J</i> = 7.9 Hz, c,c'), 7.33 (2H, t, <i>J</i> = 7.8 Hz, b,b'), 7.30–7.15 (2H, m, NH,k), 7.12 (1H, t, <i>J</i> = 7.5 Hz, a), 6.85–6.70 (3H, m, j,l,n), 3.81 (3H, s, o), 2.67 (1H, dd, <i>J</i> = 13.2 Hz, 6.5 Hz, h), 2.56 (1H, dd, <i>J</i> = 13.2 Hz, 6.9 Hz, h), 2.50–2.35 (2H, m, f,g), 2.20–2.05 (1H, m, f), 1.04 (3H, d, <i>J</i> = 6.2 Hz, m). |
| <b><sup>13</sup>C NMR (75 MHz, CDCl<sub>3</sub>)</b> | $\delta$ 170.59 (e), 159.58 (m), 141.83 (i), 137.85 (d), 129.29 (b,b'), 129.00 (k), 124.24 (a), 121.69 (j), 119.80 (c,c'), 114.96 (n), 111.38 (l), 55.11 (o), 44.48 (h), 43.14 (f), 32.58 (g), 19.69 (p).                                                                                                                                                                    |
| <b>IR (neat)</b>                                     | 3308 (N-H stretch), 2927, 1658 (C=O stretch), 1600, 1544 (N-H bend), 1499, 1441, 1322 (C-O stretch), 1260 (C-N stretch), 1153, 1069, 1043, 755 cm <sup>-1</sup> .                                                                                                                                                                                                            |
| <b>HRMS (EI)</b>                                     | Calcd. for C <sub>18</sub> H <sub>21</sub> NO <sub>2</sub> : 283.1572, found 283.1573 <i>m/z</i> .                                                                                                                                                                                                                                                                           |

**<sup>1</sup>H NMR of (S)-4-(3-methoxyphenyl)-3-methylbutanoic acid phenyl amide**

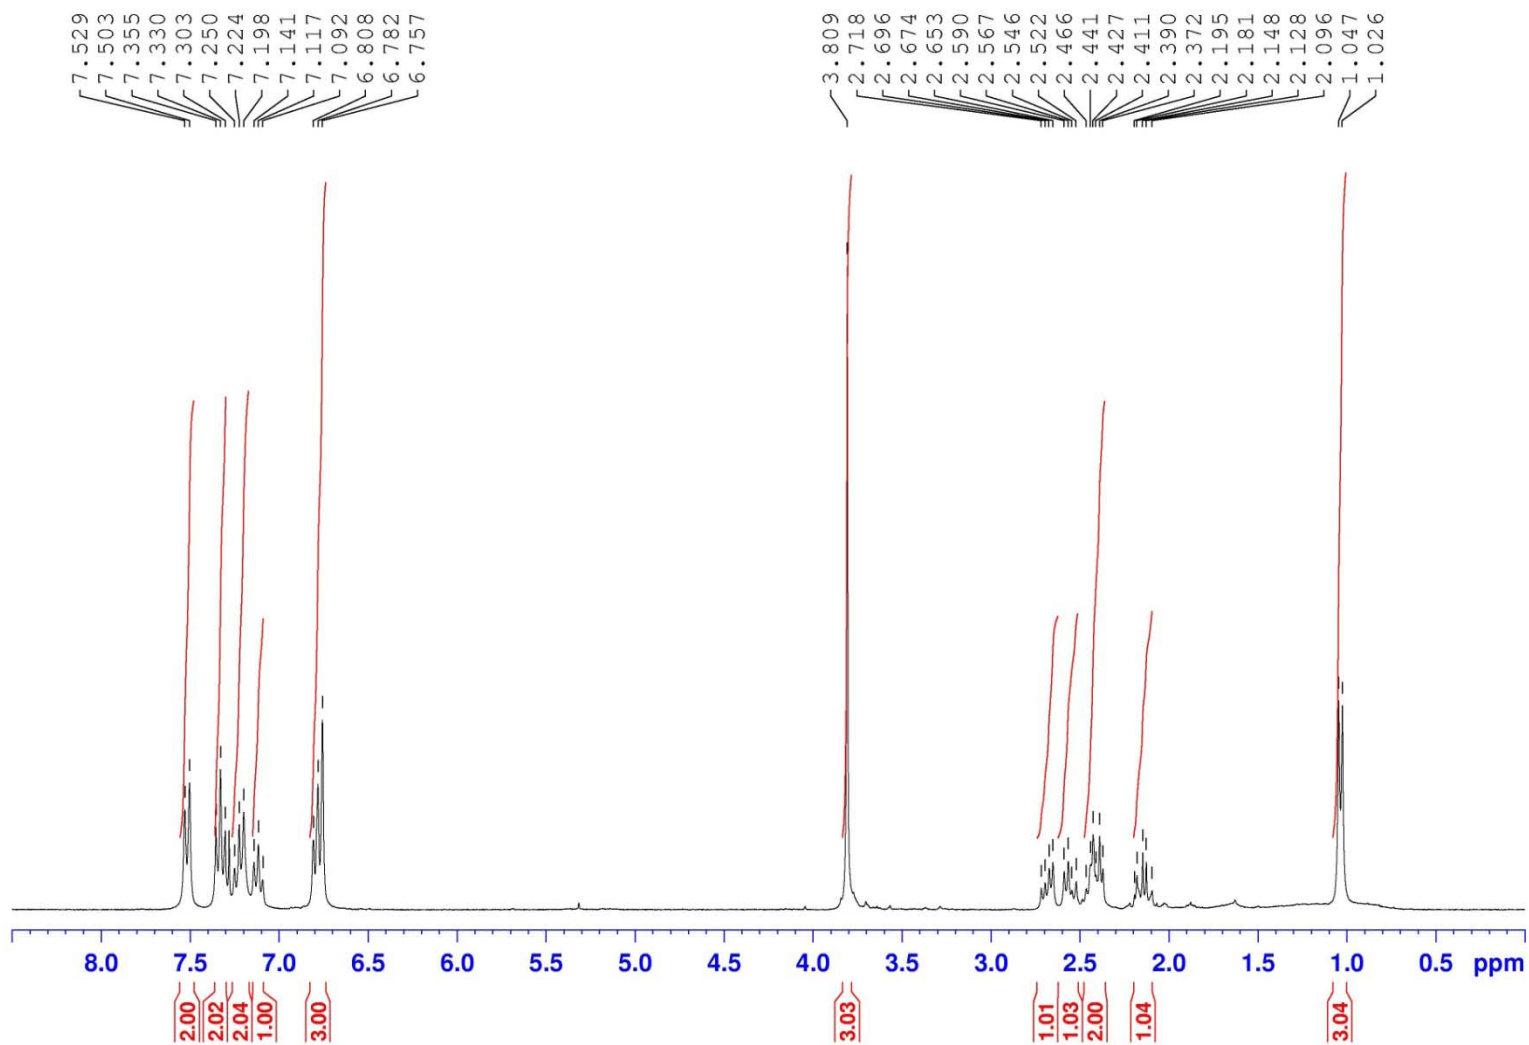

**$^{13}\text{C}$  NMR of (*S*)-4-(3-methoxyphenyl)-3-methylbutanoic acid phenyl amide**

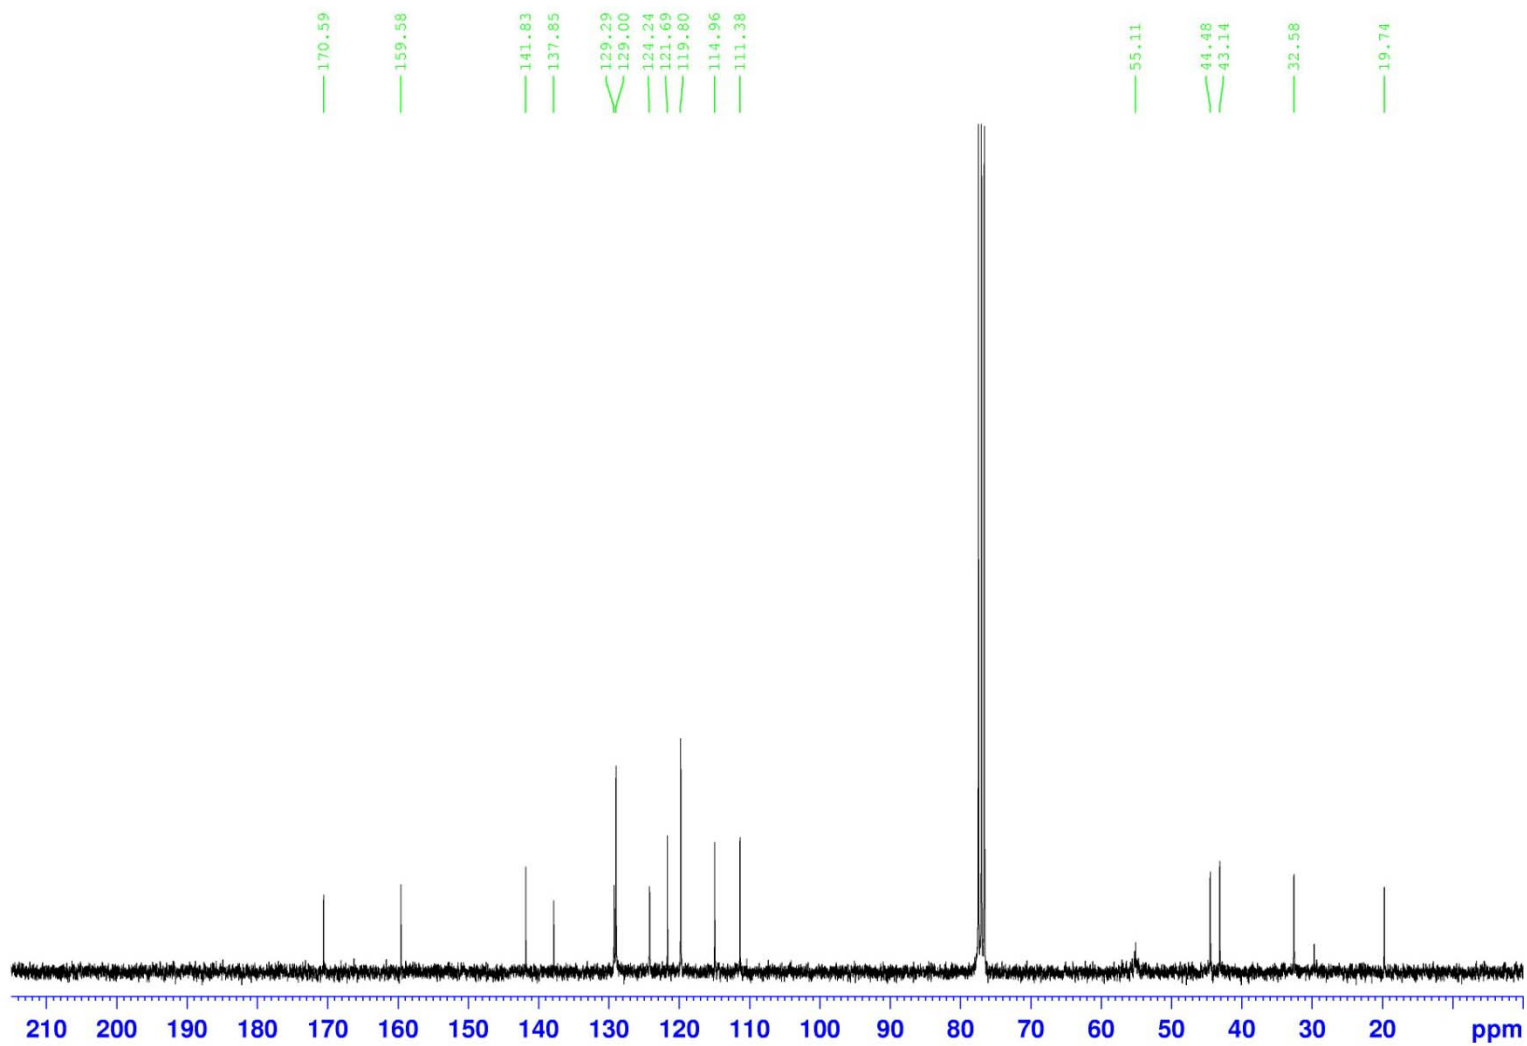



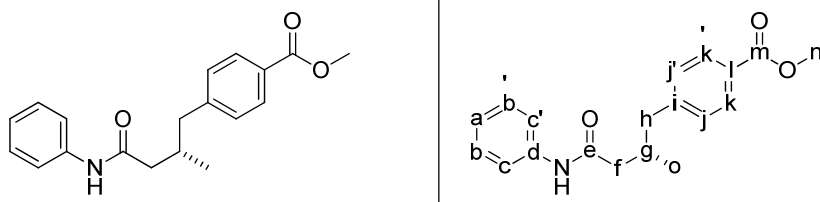

Following the general procedure for the palladium catalyzed C-C cross-coupling of trifluoroborate salts with (*S*)-**10a** affords, after flash chromatography on silica gel (75:25 hexanes:ethyl acetate), the title compound (70%) as a white solid.

|                                                      |                                                                                                                                                                                                                                                                                                                                                                                                                      |
|------------------------------------------------------|----------------------------------------------------------------------------------------------------------------------------------------------------------------------------------------------------------------------------------------------------------------------------------------------------------------------------------------------------------------------------------------------------------------------|
| <b>m.p.</b>                                          | 68.5–69.5 °C                                                                                                                                                                                                                                                                                                                                                                                                         |
| <b>Optical rotation</b>                              | $[\alpha]_{\text{D}}^{20} = +8.0^{\circ}$ ( <i>c</i> 0.5, CHCl <sub>3</sub> )                                                                                                                                                                                                                                                                                                                                        |
| <b>TLC analysis</b>                                  | <i>R<sub>f</sub></i> 0.4 (80:20 hexanes:ethyl acetate)                                                                                                                                                                                                                                                                                                                                                               |
| <b><sup>1</sup>H NMR (300 MHz, CDCl<sub>3</sub>)</b> | δ 7.98 (2H, d, <i>J</i> = 7.9 Hz, k,k'), 7.52 (2H, d, <i>J</i> = 7.8 Hz, c,c'), 7.40–7.25 (4H, m, b,b',j,j'), 7.12 (1H, t, <i>J</i> = 7.3 Hz, a), 3.92 (3H, s, n), 2.81 (1H, dd, <i>J</i> = 13.1 Hz, 5.9 Hz, h), 2.60 (1H, dd, <i>J</i> = 13.1 Hz, 7.6 Hz, h), 2.55–2.40 (1H, m, g), 2.37 (1H, dd, <i>J</i> = 14.2 Hz, 5.9 Hz, f), 2.18 (1H, dd, <i>J</i> = 14.1 Hz, 7.7 Hz, f), 1.01 (3H, d, <i>J</i> = 6.4 Hz, o). |
| <b><sup>13</sup>C NMR (75 MHz, CDCl<sub>3</sub>)</b> | δ 170.13 (e), 167.13 (m), 145.80 (i), 137.74 (d), 129.70 (k,k'), 129.30 (b,b'), 129.03 (j,j'), 128.12 (l), 124.31 (a), 119.80 (c,c'), 52.02 (n), 44.38 (h), 42.95 (f), 32.43 (g), 19.57 (o).                                                                                                                                                                                                                         |
| <b>IR (neat)</b>                                     | 3311 (N-H stretch), 2923, 1719 (C=O stretch), 1655, 1600, 1530 (N-H stretch), 1444, 1301 (C-O stretch) 1273, 1175 (C-N stretch), 1020, 868, 767 cm <sup>-1</sup> .                                                                                                                                                                                                                                                   |
| <b>HRMS (ESI)</b>                                    | Calcd. for C <sub>19</sub> H <sub>21</sub> NaNO <sub>3</sub> (M+Na): 334.1419, found 334.1426 <i>m/z</i> .                                                                                                                                                                                                                                                                                                           |

**<sup>1</sup>H NMR of (*S*)-3-methyl-4-(4-methylcarboxyphenyl)butanoic acid phenyl amide**

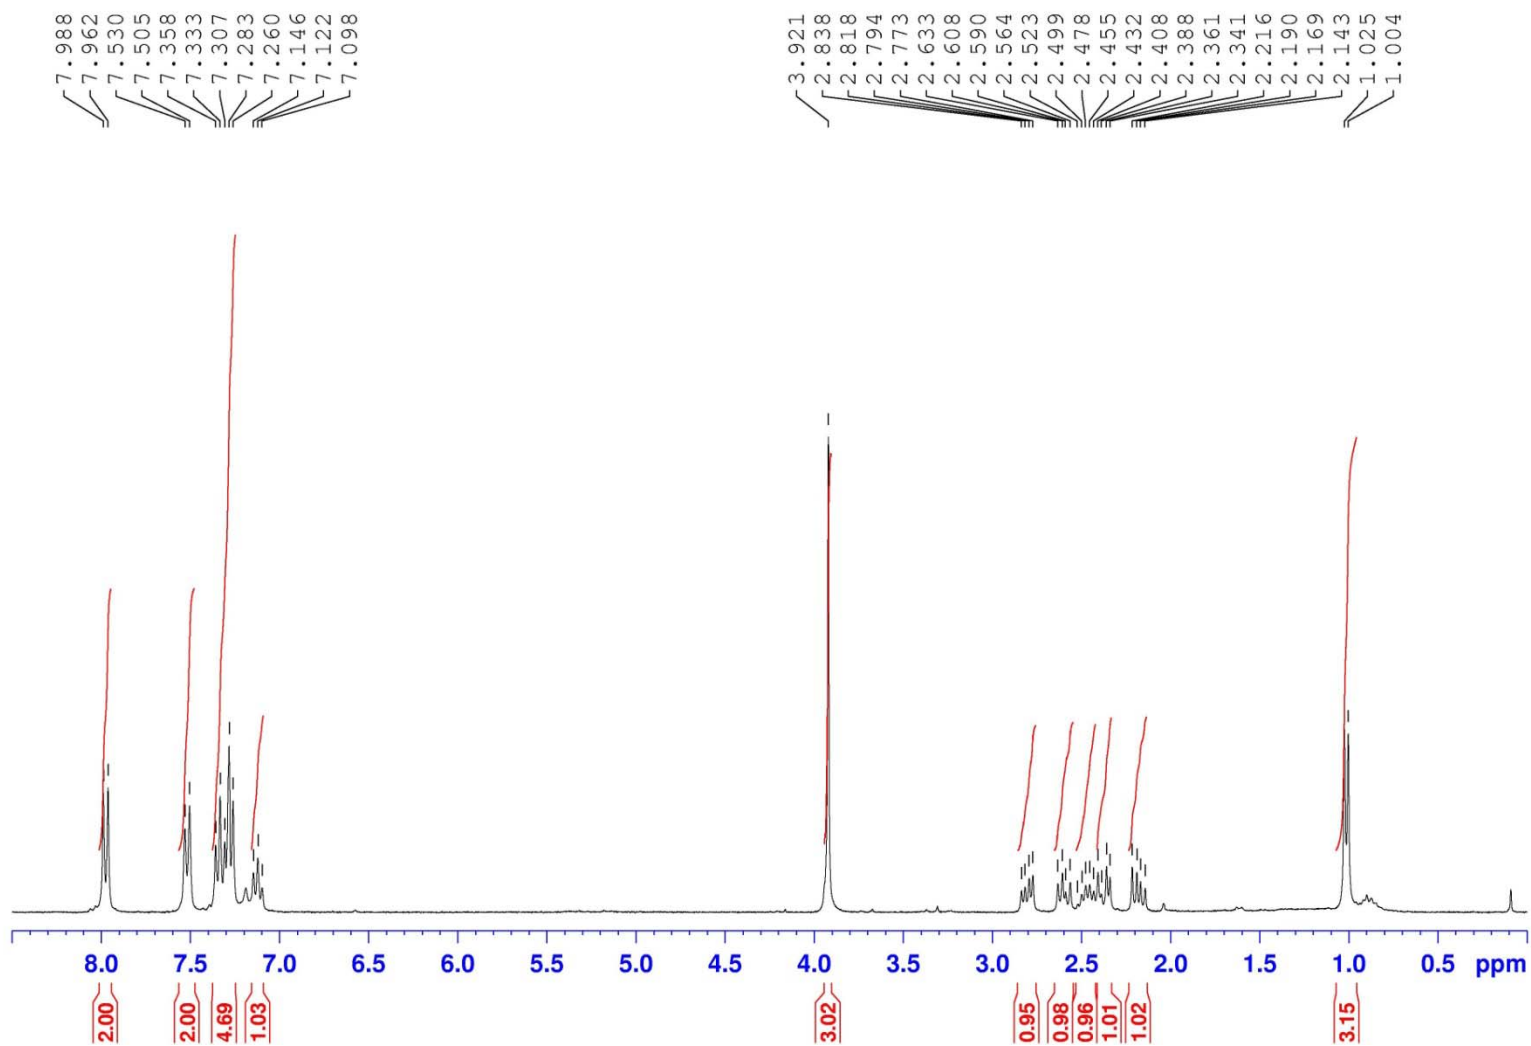

**<sup>13</sup>C NMR of (*S*)-3-methyl-4-(4-methylcarboxyphenyl)butanoic acid phenyl amide**

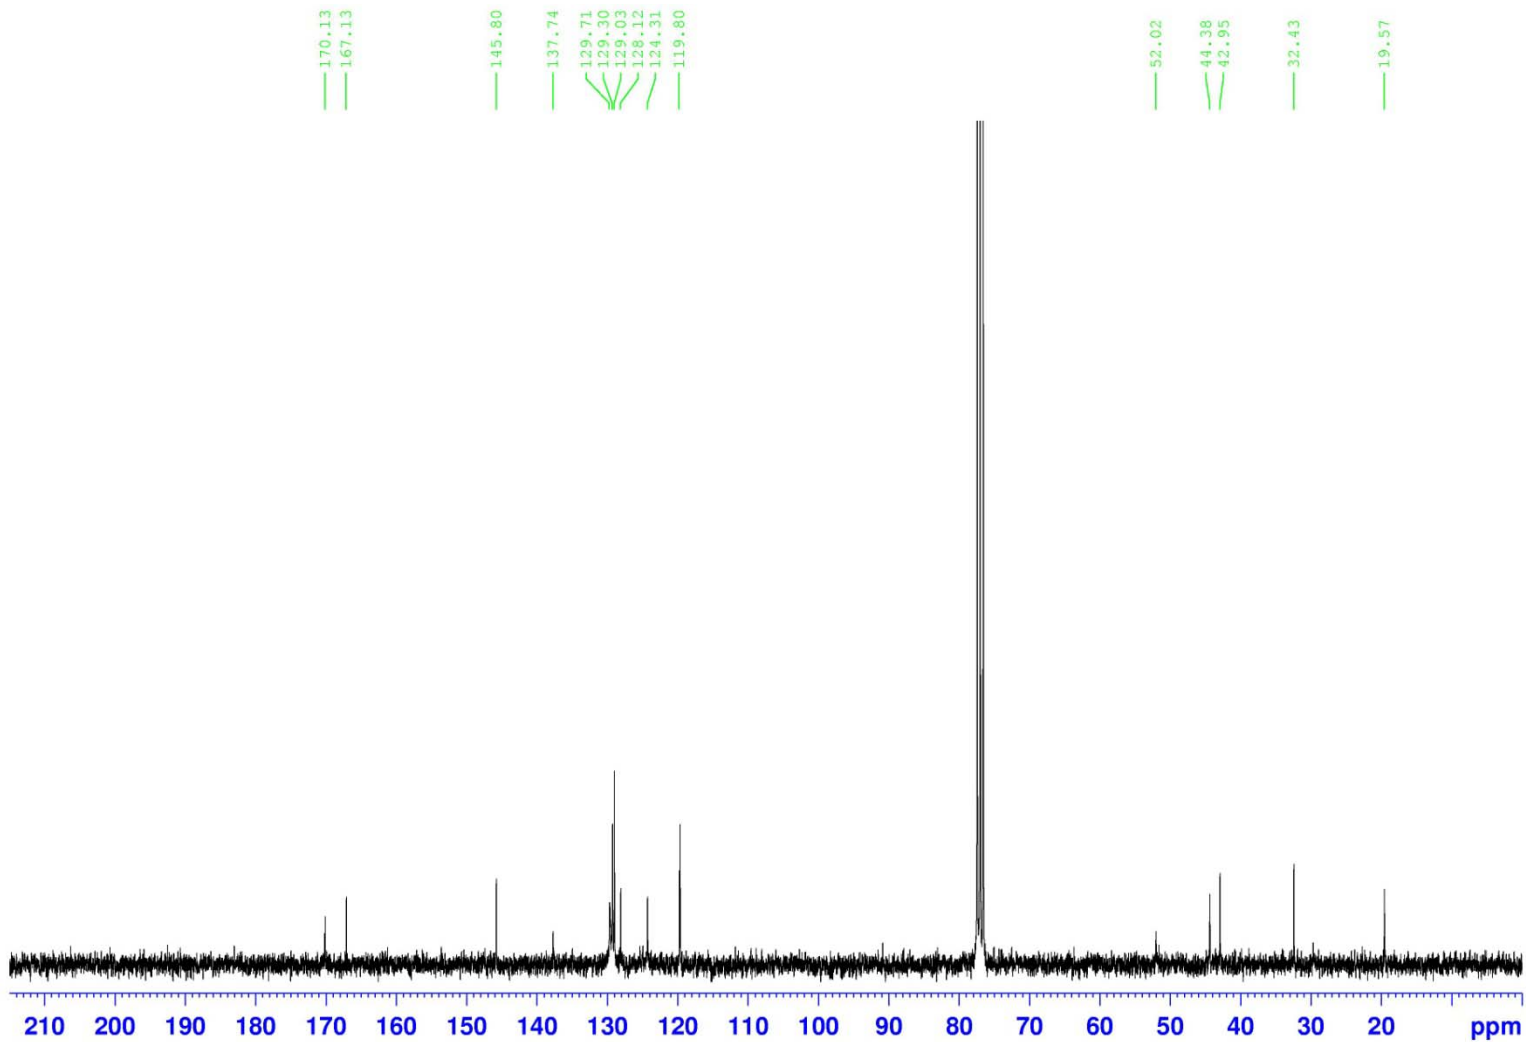

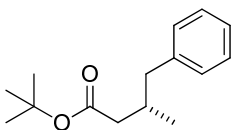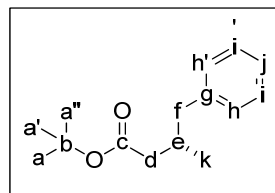

Following the general procedure for the palladium catalyzed C-C cross-coupling of trifluoroborate salts with (*S*)-**10g** affords, after flash chromatography on silica gel (98:2 hexanes:ethyl acetate), the title compound (82%) as a colorless oil.

|                                                      |                                                                                                                                                                                                                                                                    |
|------------------------------------------------------|--------------------------------------------------------------------------------------------------------------------------------------------------------------------------------------------------------------------------------------------------------------------|
| <b>Optical rotation</b>                              | $[\alpha]_{\text{D}}^{20} = +3.0^{\circ}$ ( <i>c</i> 0.5, CHCl <sub>3</sub> )                                                                                                                                                                                      |
| <b>TLC analysis</b>                                  | $R_f$ 0.7 (90:10 hexanes:ethyl acetate)                                                                                                                                                                                                                            |
| <b><sup>1</sup>H NMR (300 MHz, CDCl<sub>3</sub>)</b> | $\delta$ 7.35–7.25 (2H, m, i,i'), 7.25–7.15 (3H, m, h,h',j), 2.67 (1H, dd, <i>J</i> = 13.4 Hz, 6.1 Hz, f), 2.49 (1H, dd, <i>J</i> = 13.4 Hz, 7.4 Hz, f), 2.30–2.20 (2H, m, d,e), 2.15–2.00 (1H, m, d), 1.48 (9H, s, a,a',a''), 0.95 (3H, d, <i>J</i> = 6.4 Hz, k). |
| <b><sup>13</sup>C NMR (75 MHz, CDCl<sub>3</sub>)</b> | $\delta$ 172.46 (c), 140.46 (g), 129.24 (i,i'), 128.22 (h,h'), 125.94 (j), 80.10 (b), 42.96 (f), 42.47 (d), 32.44 (e), 28.15 (a,a',a''), 19.41 (k).                                                                                                                |
| <b>IR (neat)</b>                                     | 2977, 1725 (C=O stretch), 1454, 1392, 1367 (C-O stretch), 1146, 1051, 755 cm <sup>-1</sup> .                                                                                                                                                                       |
| <b>HRMS (FAB)</b>                                    | Calcd. for C <sub>15</sub> H <sub>22</sub> NaO <sub>2</sub> (M+Na): 257.1518, found 257.1520 <i>m/z</i> .                                                                                                                                                          |

**<sup>1</sup>H NMR of (*S*)-3-methyl-4-phenylbutanoic acid *tert*-butyl ester**

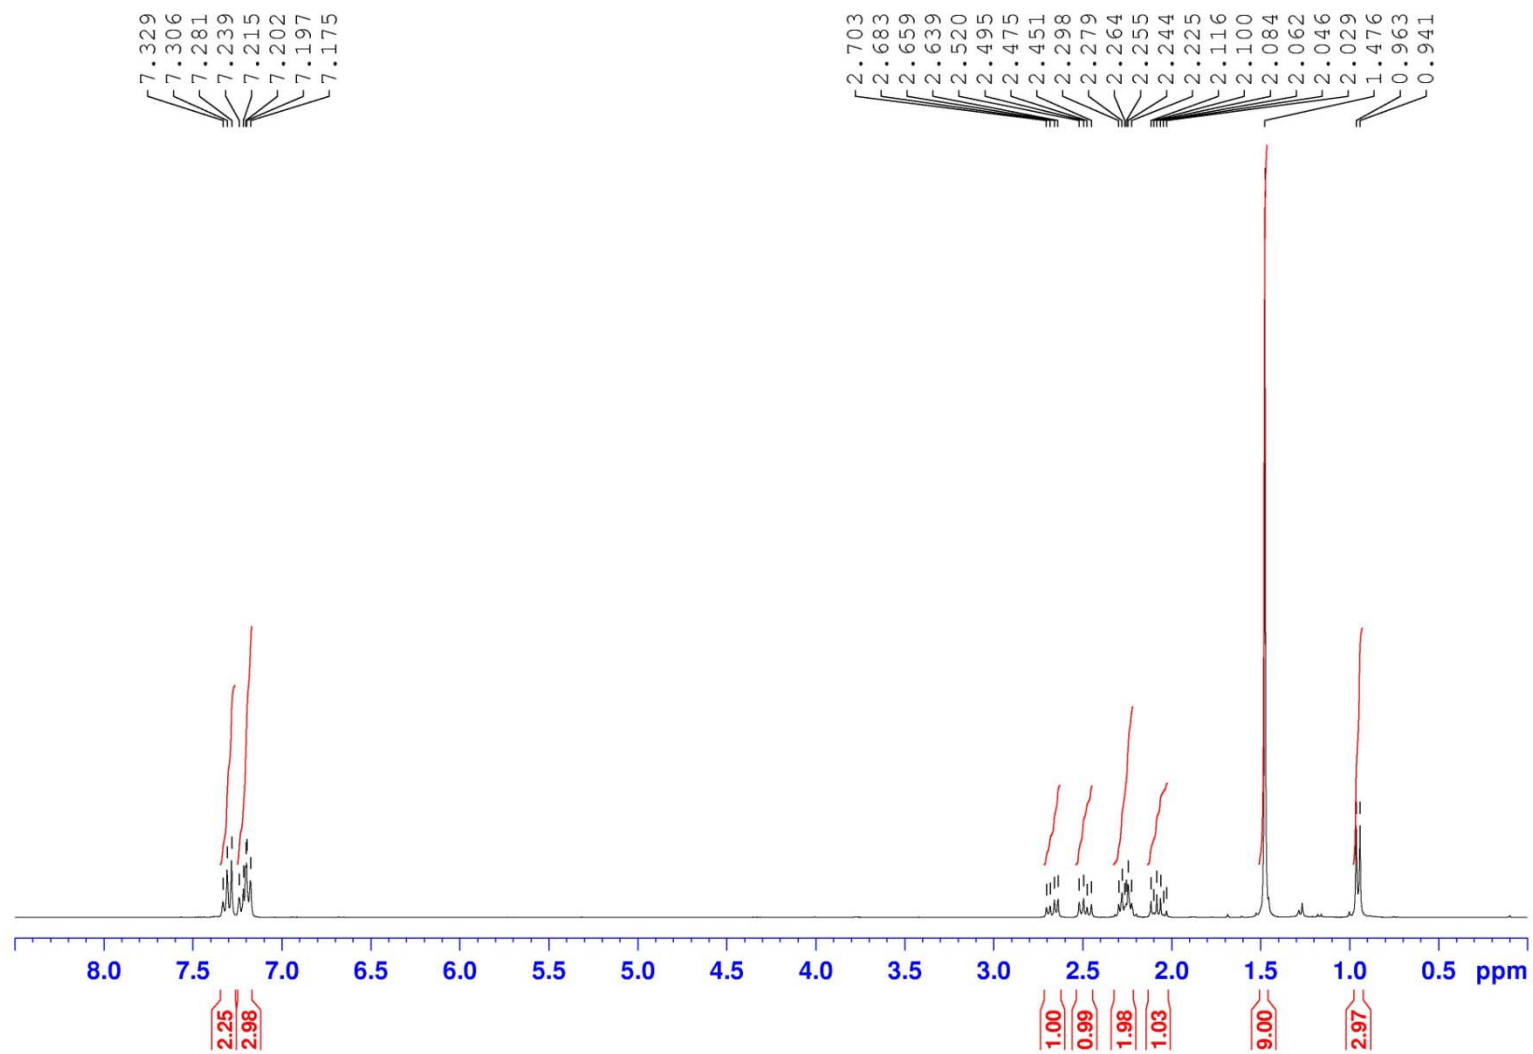

**<sup>13</sup>C NMR of (*S*)-3-methyl-4-phenylbutanoic acid *tert*-butyl ester**

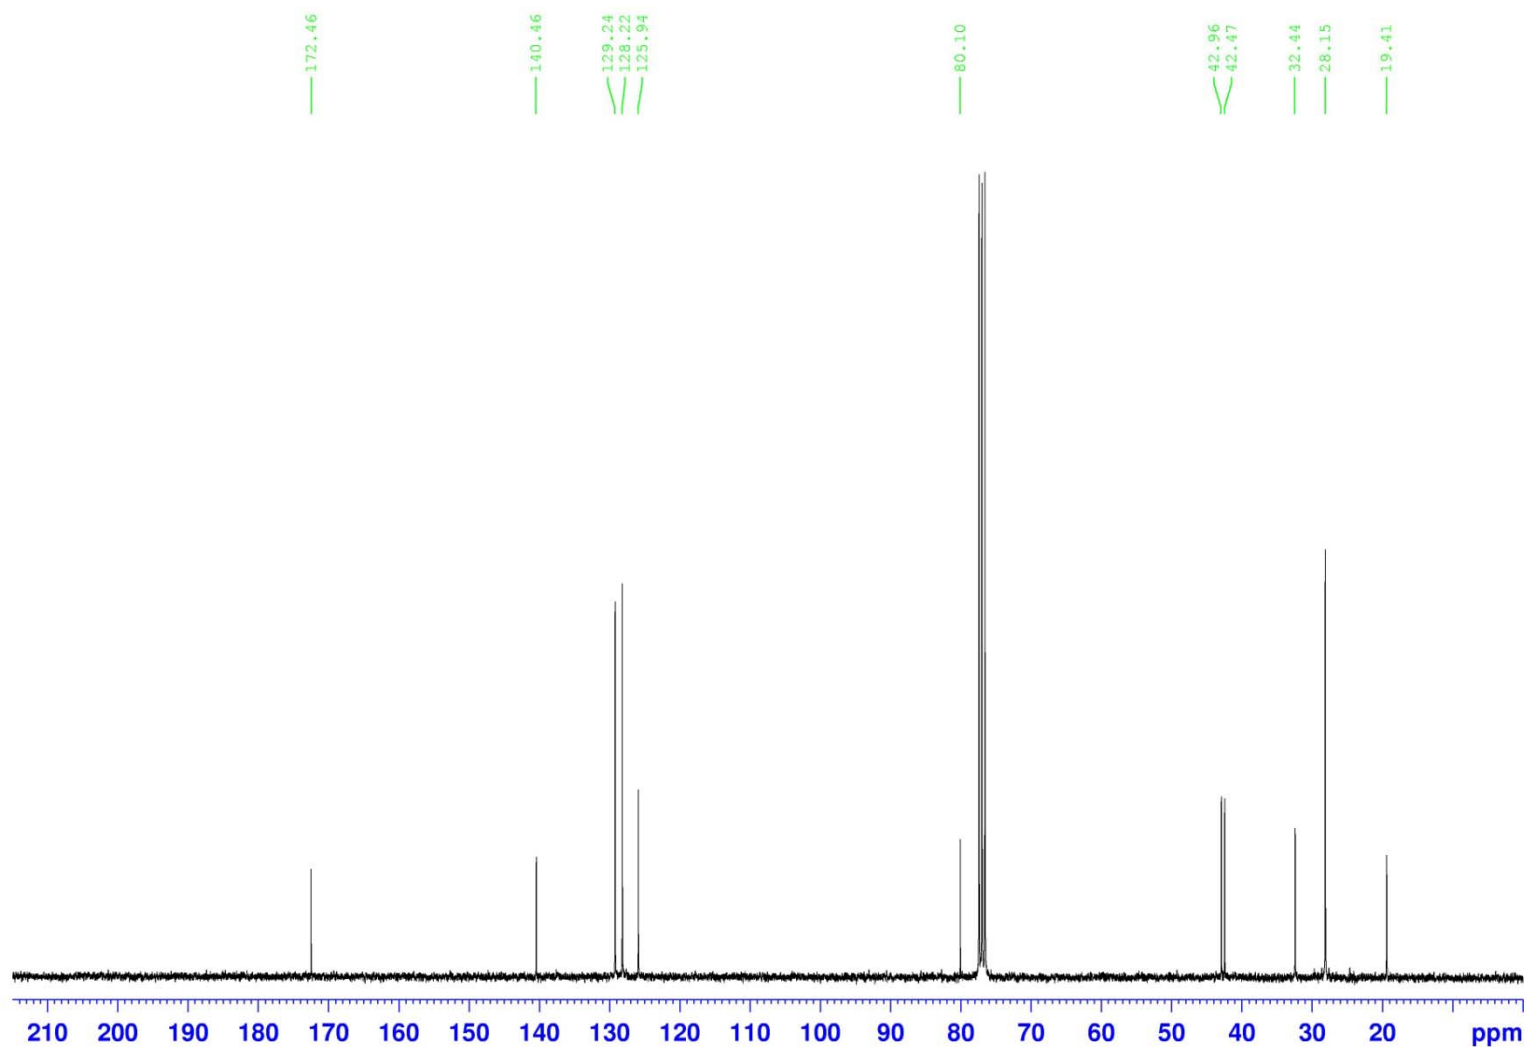

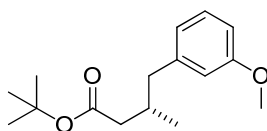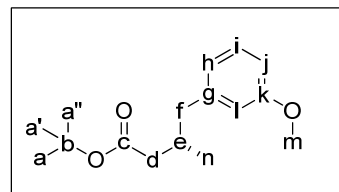

Following the general procedure for the palladium catalyzed C-C cross-coupling of trifluoroborate salts with (*S*)-**10g** affords, after flash chromatography on silica gel (98:2 hexanes:ethyl acetate), the title compound (82%) as a colorless oil.

|                                                       |                                                                                                                                                                                                                                                                                     |
|-------------------------------------------------------|-------------------------------------------------------------------------------------------------------------------------------------------------------------------------------------------------------------------------------------------------------------------------------------|
| <b>Optical rotation</b>                               | $[\alpha]_{\text{D}}^{20} = +3.2^{\circ}$ ( <i>c</i> 0.5, CHCl <sub>3</sub> )                                                                                                                                                                                                       |
| <b>TLC analysis</b>                                   | 0.6 (90:10 hexanes:ethyl acetate)                                                                                                                                                                                                                                                   |
| <b><sup>1</sup>H NMR (400 MHz, CDCl<sub>3</sub>)</b>  | δ 7.22 (1H, t, <i>J</i> = 7.8 Hz, i), 6.80–6.70 (3H, m, h,j,l), 3.82 (3H, s, m), 2.64 (1H, dd, <i>J</i> = 13.3 Hz, 6.1 Hz, f), 2.46 (1H, dd, <i>J</i> = 13.3, 7.4 Hz, f), 2.30–2.20 (2H, m, d,e), 2.15–2.00 (1H, m, d), 1.48 (9H, s, a,a',a''), 0.96 (3H, d, <i>J</i> = 6.3 Hz, n). |
| <b><sup>13</sup>C NMR (100 MHz, CDCl<sub>3</sub>)</b> | δ 172.45 (c), 159.54 (k), 142.10 (g), 129.15 (i), 121.70 (h), 114.94 (l), 111.25 (j), 80.11 (b), 55.13 (m), 43.01 (f), 42.48 (d), 32.36 (e), 28.15 (a,a',a''), 19.46 (n).                                                                                                           |
| <b>IR (neat)</b>                                      | 2929, 1725 (C=O stretch), 1601, 1584, 1455, 1366, 1316 (C-O stretch), 1260, 1044, 779 cm <sup>-1</sup> .                                                                                                                                                                            |
| <b>HRMS (EI)</b>                                      | Calcd. for C <sub>16</sub> H <sub>24</sub> O <sub>3</sub> : 264.1725, found 264.1729 <i>m/z</i> .                                                                                                                                                                                   |

**<sup>1</sup>H NMR of (*S*)-3-methyl-4-(3-methoxyphenyl)butanoic acid *tert*-butyl ester**

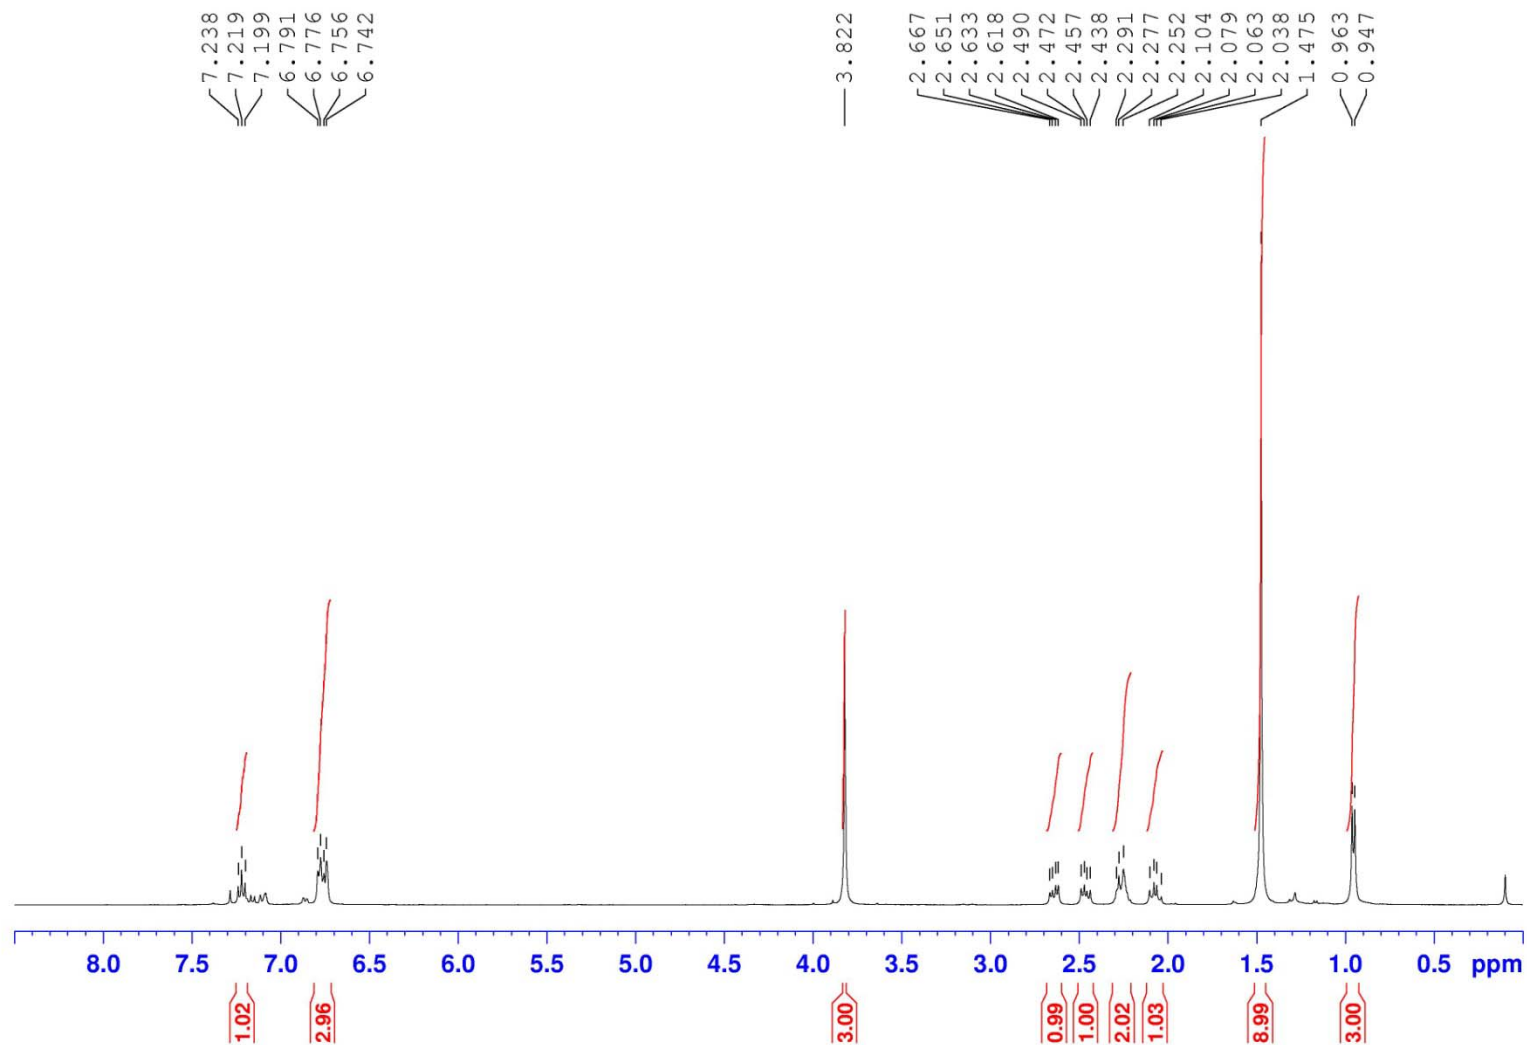



**$^{13}\text{C}$  NMR of (*S*)-3-methyl-4-(3-methoxyphenyl)butanoic acid *tert*-butyl ester**

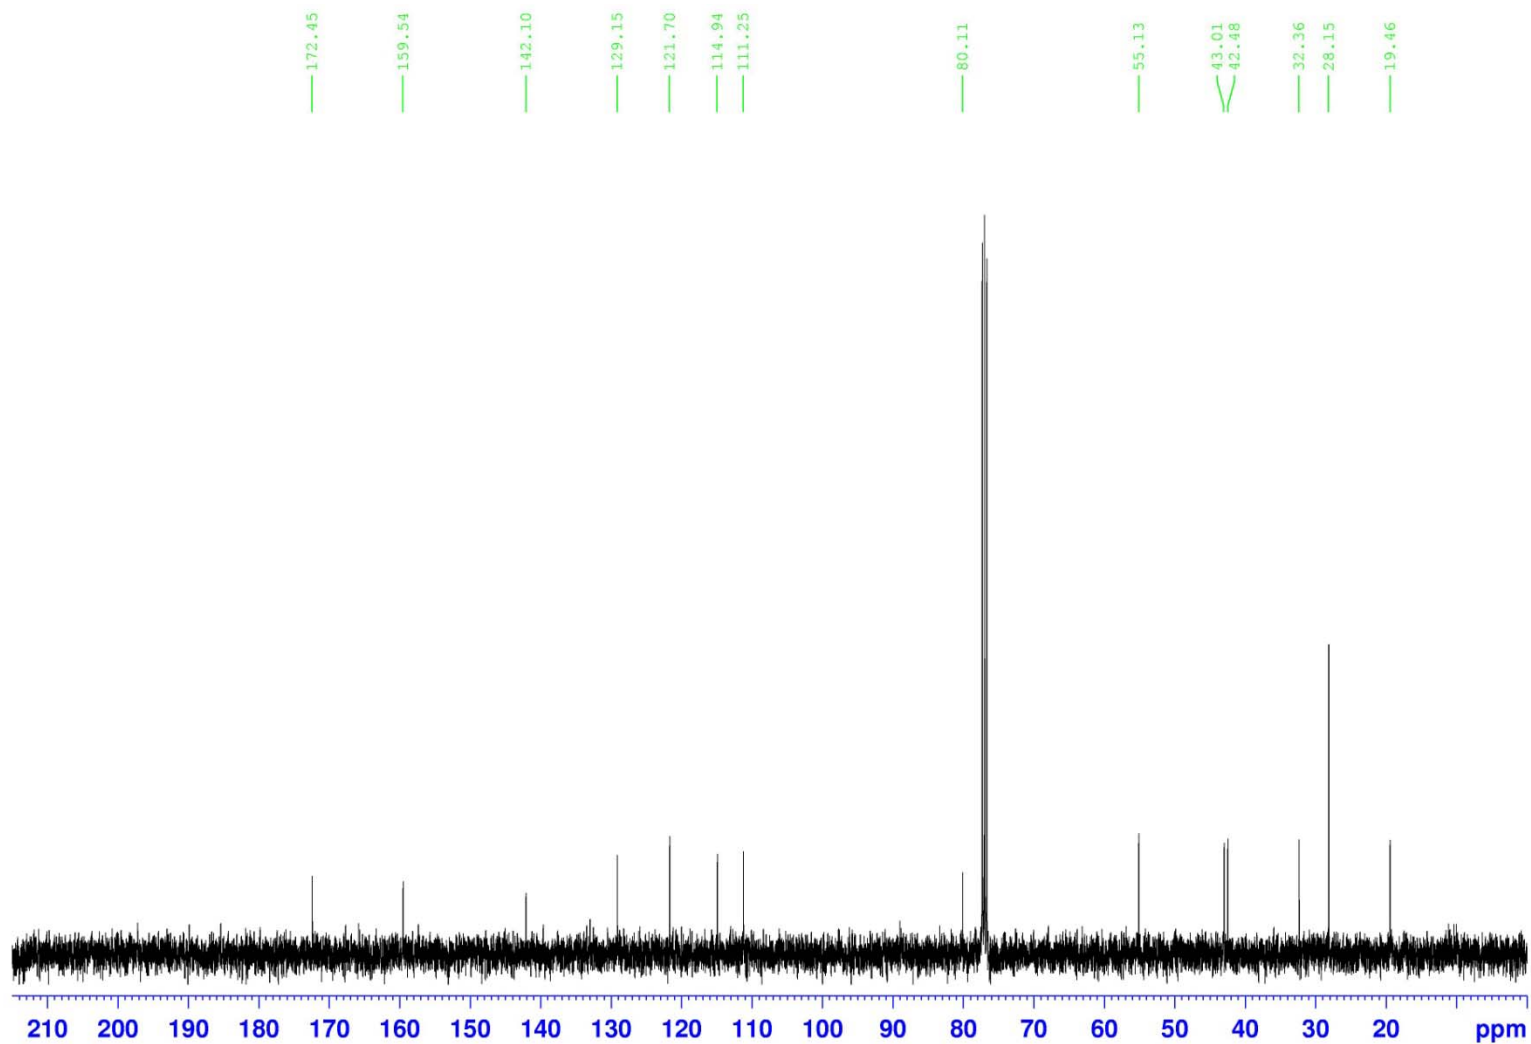

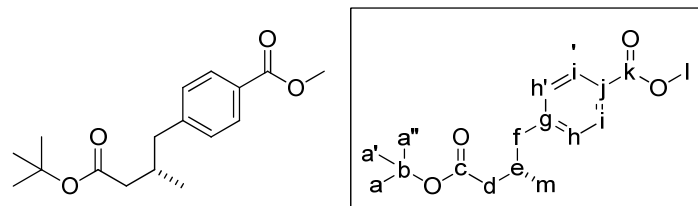

Following the general procedure for the palladium catalyzed C-C cross-coupling of trifluoroborate salts with (*S*)-**10g** affords, after flash chromatography on silica gel (98:2 hexanes:ethyl acetate), the title compound (88%) as a white solid.

|                                                       |                                                                                                                                                                                                                                                                                      |
|-------------------------------------------------------|--------------------------------------------------------------------------------------------------------------------------------------------------------------------------------------------------------------------------------------------------------------------------------------|
| <b>Optical rotation</b>                               | $[\alpha]_{\text{D}}^{20} = +2.6^{\circ}$ ( <i>c</i> 0.5, CHCl <sub>3</sub> )                                                                                                                                                                                                        |
| <b>TLC analysis</b>                                   | $R_f$ 0.7 (90:10 hexanes:ethyl acetate)                                                                                                                                                                                                                                              |
| <b><sup>1</sup>H NMR (400 MHz, CDCl<sub>3</sub>)</b>  | $\delta$ 7.98 (2H, d, $J = 8.2$ Hz, i,i'), 7.26 (2H, d, $J = 8.2$ Hz, h,h'), 3.92 (3H, s, l), 2.73 (1H, dd, $J = 13.3$ Hz, 6.0 Hz, f), 2.53 (1H, dd, $J = 13.3$ Hz, 7.7 Hz, f), 2.35–2.20 (2H, m, d,e), 2.15–2.05 (1H, m, d), 1.47 (9H, s, a,a',a''), 0.94 (3H, d, $J = 6.6$ Hz, m). |
| <b><sup>13</sup>C NMR (100 MHz, CDCl<sub>3</sub>)</b> | $\delta$ 172.19 (c), 167.13 (k), 146.04 (g), 129.60 (i,i'), 129.25 (h,h'), 128.03 (j), 80.28 (b), 52.00 (l), 42.84 (f), 42.34 (d), 32.26 (e), 28.13 (a,a',a''), 19.36 (m).                                                                                                           |
| <b>IR (neat)</b>                                      | 2931, 1722 (C=O stretch), 1610, 1457, 1415, 1367 (C-O stretch), 1278, 1178, 1148, 1108, 667, 759 cm <sup>-1</sup> .                                                                                                                                                                  |
| <b>HRMS (FAB)</b>                                     | Calcd. for C <sub>17</sub> H <sub>24</sub> NaO <sub>4</sub> (M+Na): 315.1572, found 315.1566 <i>m/z</i> .                                                                                                                                                                            |

**<sup>1</sup>H NMR of (*S*)-3-methyl-4-(4-methylcarboxyphenyl)butanoic acid *tert*-butyl ester**

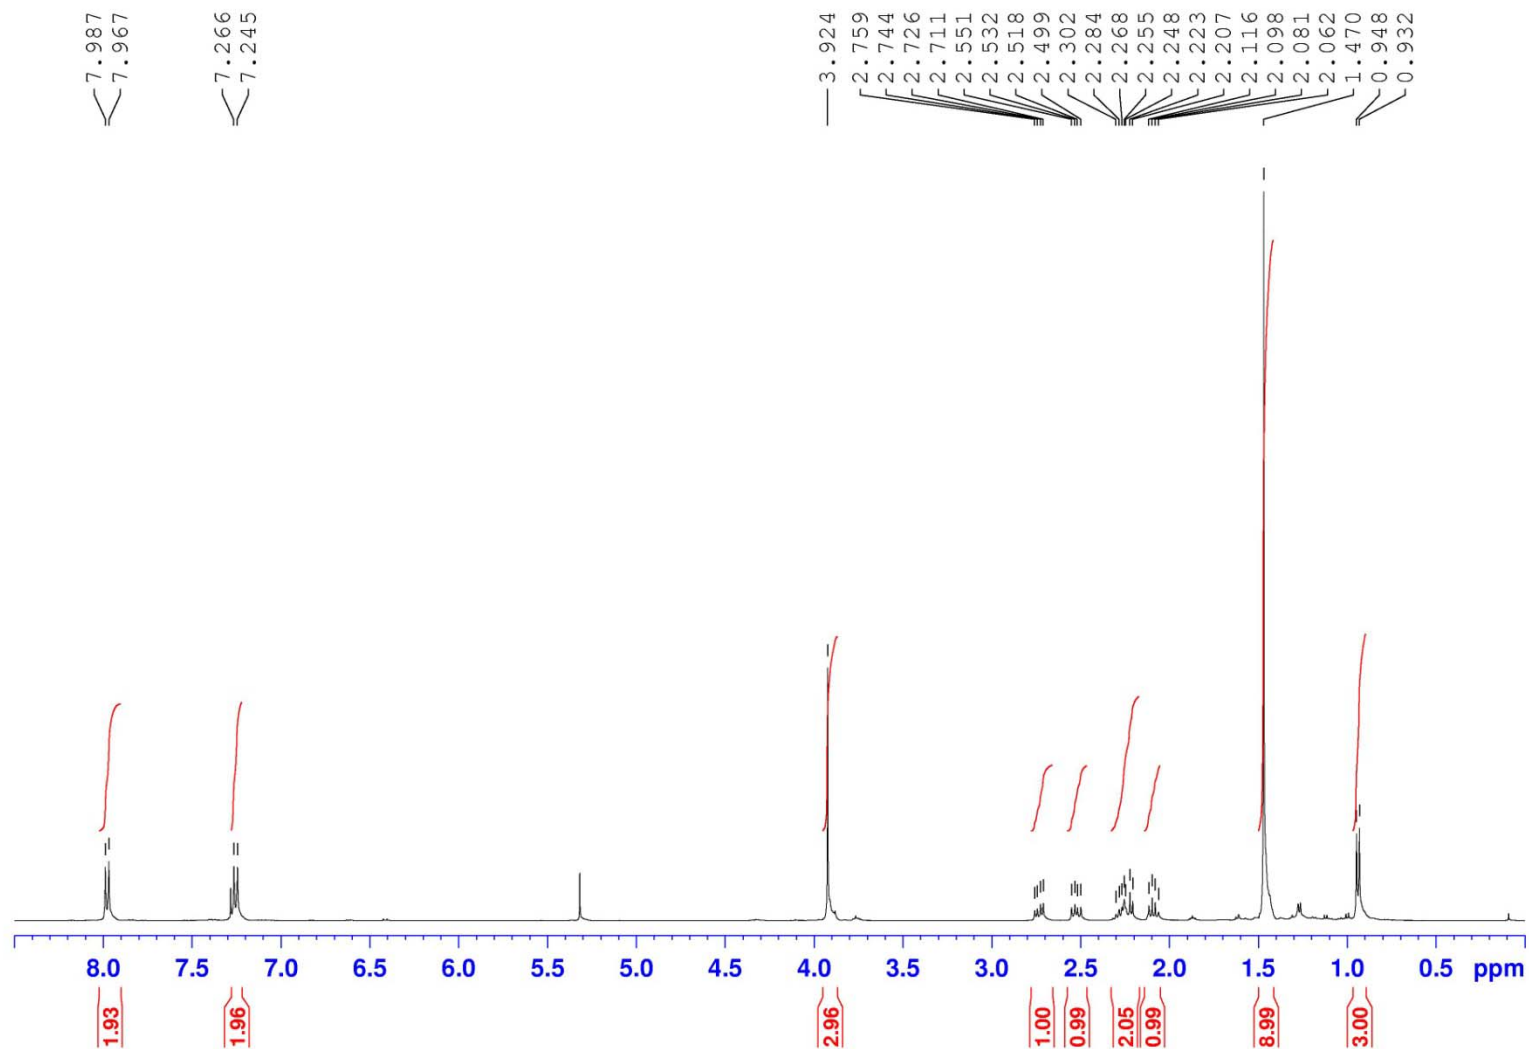

<sup>13</sup>C NMR of (*S*)-3-methyl-4-(4-methylcarboxyphenyl)butanoic acid *tert*-butyl ester

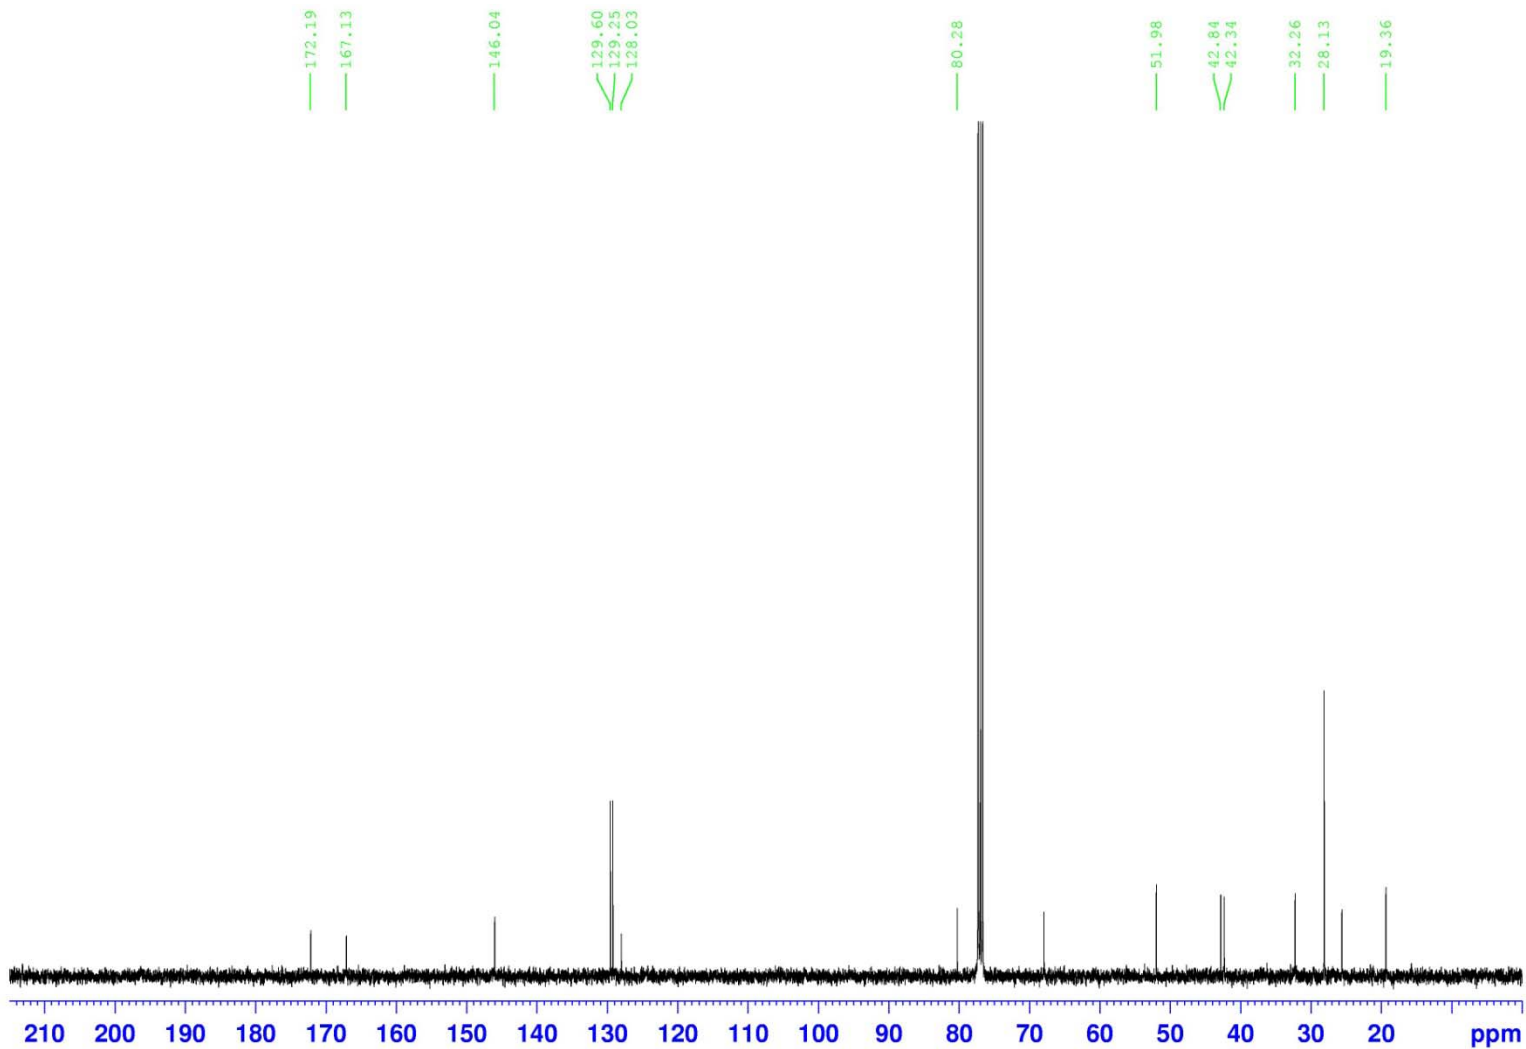

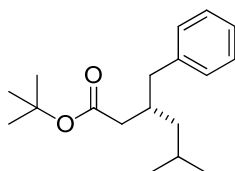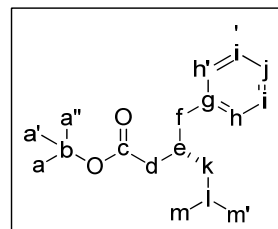

Following the general procedure for the palladium catalyzed C-C cross-coupling of trifluoroborate salts with (*R*)-**10i** affords, after flash chromatography on silica gel (98:2 hexanes:ethyl acetate), the title compound (80%) as a colorless oil.

|                                                       |                                                                                                                                                                                                                                                                                                                                  |
|-------------------------------------------------------|----------------------------------------------------------------------------------------------------------------------------------------------------------------------------------------------------------------------------------------------------------------------------------------------------------------------------------|
| <b>Optical rotation</b>                               | $[\alpha]_D^{20} = +5.6^\circ$ ( <i>c</i> 0.5, CHCl <sub>3</sub> )                                                                                                                                                                                                                                                               |
| <b>TLC analysis</b>                                   | <i>R<sub>f</sub></i> 0.6 (90:10 hexanes:ethyl acetate)                                                                                                                                                                                                                                                                           |
| <b><sup>1</sup>H NMR (400 MHz, CDCl<sub>3</sub>)</b>  | δ 7.35–7.25 (2H, m, i,i'), 7.25–7.15 (3H, m, h,h',j), 2.67 (1H, dd, <i>J</i> = 13.5 Hz, 6.1 Hz, f), 2.56 (1H, dd, <i>J</i> = 13.5 Hz, 7.2 Hz, f), 2.30–2.15 (1H, m, e), 2.15–2.10 (2H, m, d), 1.80–1.65 (1H, m, l), 1.47 (9H, s, a,a',a''), 1.86 (2H, t, <i>J</i> = 6.9 Hz, k), 0.90 (6H, dd, <i>J</i> = 19.1 Hz, 6.6 Hz, m,m'). |
| <b><sup>13</sup>C NMR (100 MHz, CDCl<sub>3</sub>)</b> | δ 172.62 (c), 140.46 (g), 129.37 (i,i'), 128.20 (h,h'), 125.87 (j), 80.05 (b), 43.26 (k), 40.52 (f), 39.93 (d), 34.92 (e), 28.15 (a,a',a''), 25.17 (l), 22.79 and 22.65 (m,m').                                                                                                                                                  |
| <b>IR (neat)</b>                                      | 2955, 1727 (C=O stretch), 1454, 1391, 1366 (C-O stretch), 1299, 1256, 1146, 747 cm <sup>-1</sup> .                                                                                                                                                                                                                               |
| <b>HRMS (ESI)</b>                                     | Calcd. for C <sub>18</sub> H <sub>28</sub> NaO <sub>2</sub> (M+Na): 299.1987, found 299.1974 <i>m/z</i> .                                                                                                                                                                                                                        |

**<sup>1</sup>H NMR of *S*)-5-methyl-3-phenylmethylhexanoic acid *tert*-butyl ester**

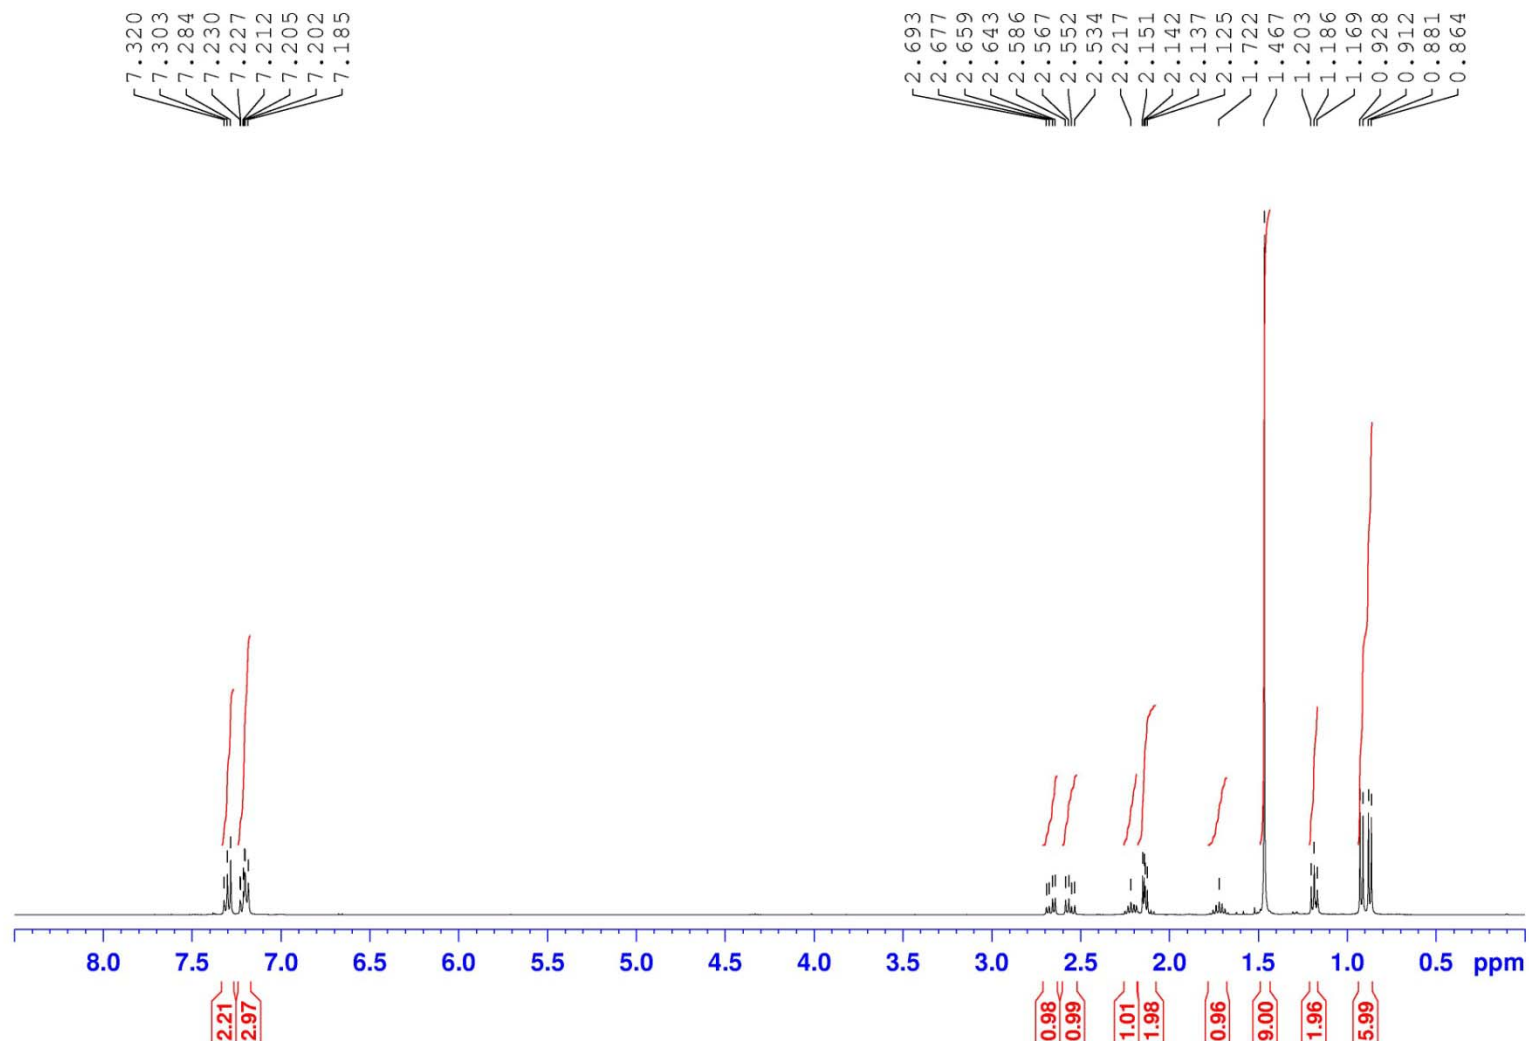

**$^{13}\text{C}$  NMR of *S*-5-methyl-3-phenylmethylhexanoic acid *tert*-butyl ester**

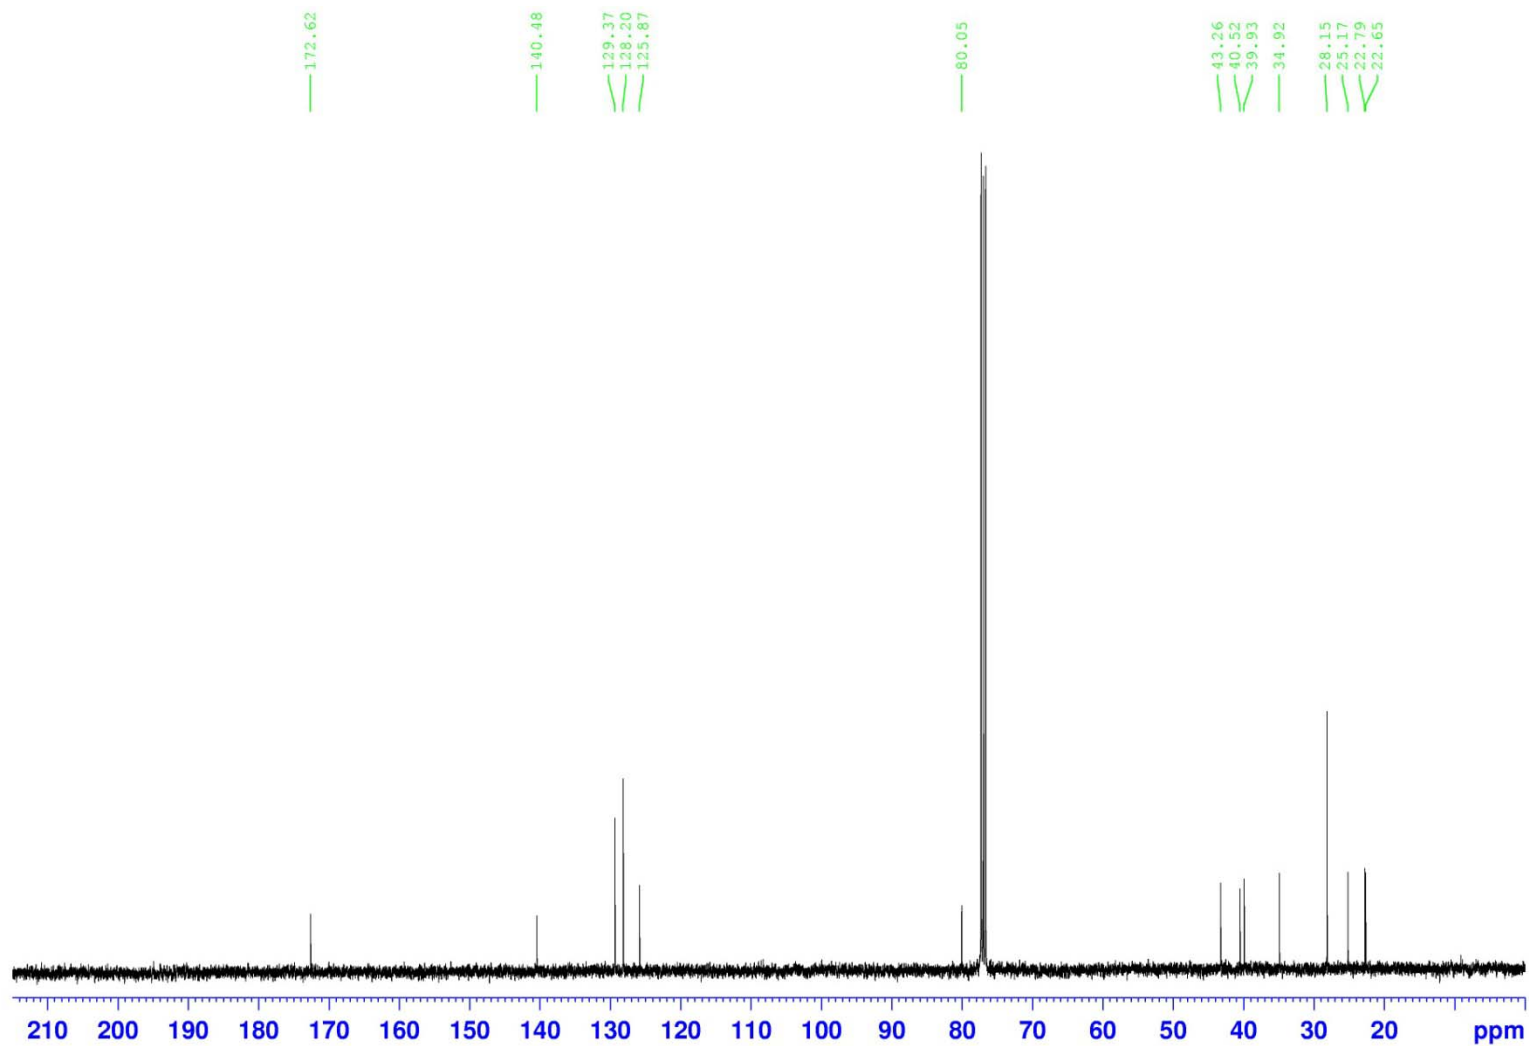

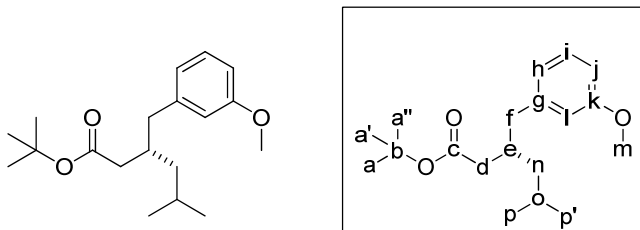

Following the general procedure for the palladium catalyzed C-C cross-coupling of trifluoroborate salts with (*R*)-**10i** affords, after flash chromatography on silica gel (98:2 hexanes:ethyl acetate), the title compound (92%) as a colorless oil.

|                                                      |                                                                                                                                                                                                                                                                                                                                         |
|------------------------------------------------------|-----------------------------------------------------------------------------------------------------------------------------------------------------------------------------------------------------------------------------------------------------------------------------------------------------------------------------------------|
| <b>Optical rotation</b>                              | $[\alpha]_{\text{D}}^{20} = +2.3^{\circ}$ ( <i>c</i> 0.5, CHCl <sub>3</sub> )                                                                                                                                                                                                                                                           |
| <b>TLC analysis</b>                                  | <i>R<sub>f</sub></i> 0.60 (90:10 hexanes:ethyl acetate)                                                                                                                                                                                                                                                                                 |
| <b><sup>1</sup>H NMR (300 MHz, CDCl<sub>3</sub>)</b> | δ 7.22 (1H, t, <i>J</i> = 7.5 Hz, i), 6.85–6.70 (3H, m, h,j,l), 3.82 (3H, s, m), 2.65 (1H, dd, <i>J</i> = 13.5 Hz, 5.8 Hz, f), 2.53 (1H, dd, <i>J</i> = 13.5 Hz, 7.0 Hz, f), 2.30–2.05 (3H, m, d,e), 1.80–1.65 (1H, m, o), 1.47 (9H, s, a,a',a''), 1.19 (2H, t, <i>J</i> = 6.8 Hz, n), 0.90 (6H, dd, <i>J</i> = 12.7 Hz, 6.5 Hz, p,p'). |
| <b><sup>13</sup>C NMR (75 MHz, CDCl<sub>3</sub>)</b> | δ 172.60 (c), 159.52 (k), 142.11 (g), 129.12 (i), 121.83 (h), 115.11 (l), 111.17 (j), 80.05 (b), 55.12 (m), 43.28 (n), 40.55 (f), 39.94 (d), 34.81 (e), 28.14 (a,a',a''), 25.17 (o), 22.79 and 22.67 (p,p').                                                                                                                            |
| <b>IR (neat)</b>                                     | 2955, 1726 (C=O stretch), 1600, 1488, 1455, 1366 (C-O stretch), 1260, 1150, 1047, 777 cm <sup>-1</sup> .                                                                                                                                                                                                                                |
| <b>HRMS (EI)</b>                                     | Calcd. for C <sub>19</sub> H <sub>30</sub> O <sub>3</sub> : 306.2195, found 306.2207 <i>m/z</i> .                                                                                                                                                                                                                                       |



**<sup>1</sup>H NMR of (S)-5-methyl-3-(3-methoxyphenyl)methylhexanoic acid *tert*-butyl ester**

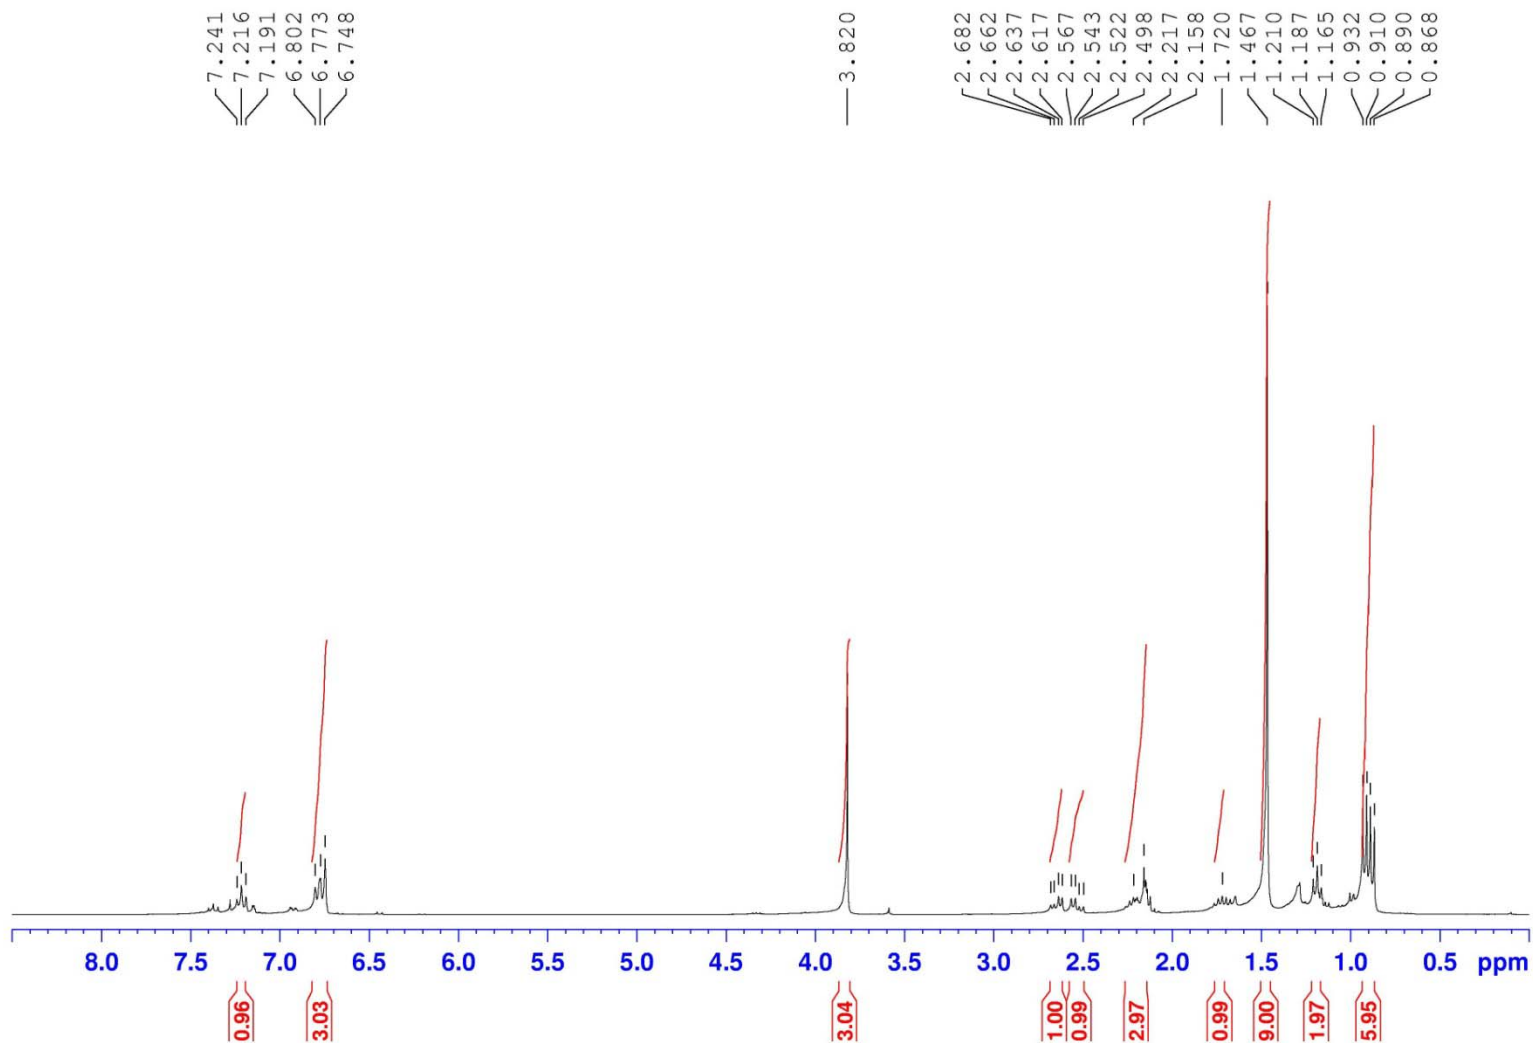

**<sup>13</sup>C NMR of (*S*)-5-methyl-3-(3-methoxyphenyl)methylhexanoic acid *tert*-butyl ester**

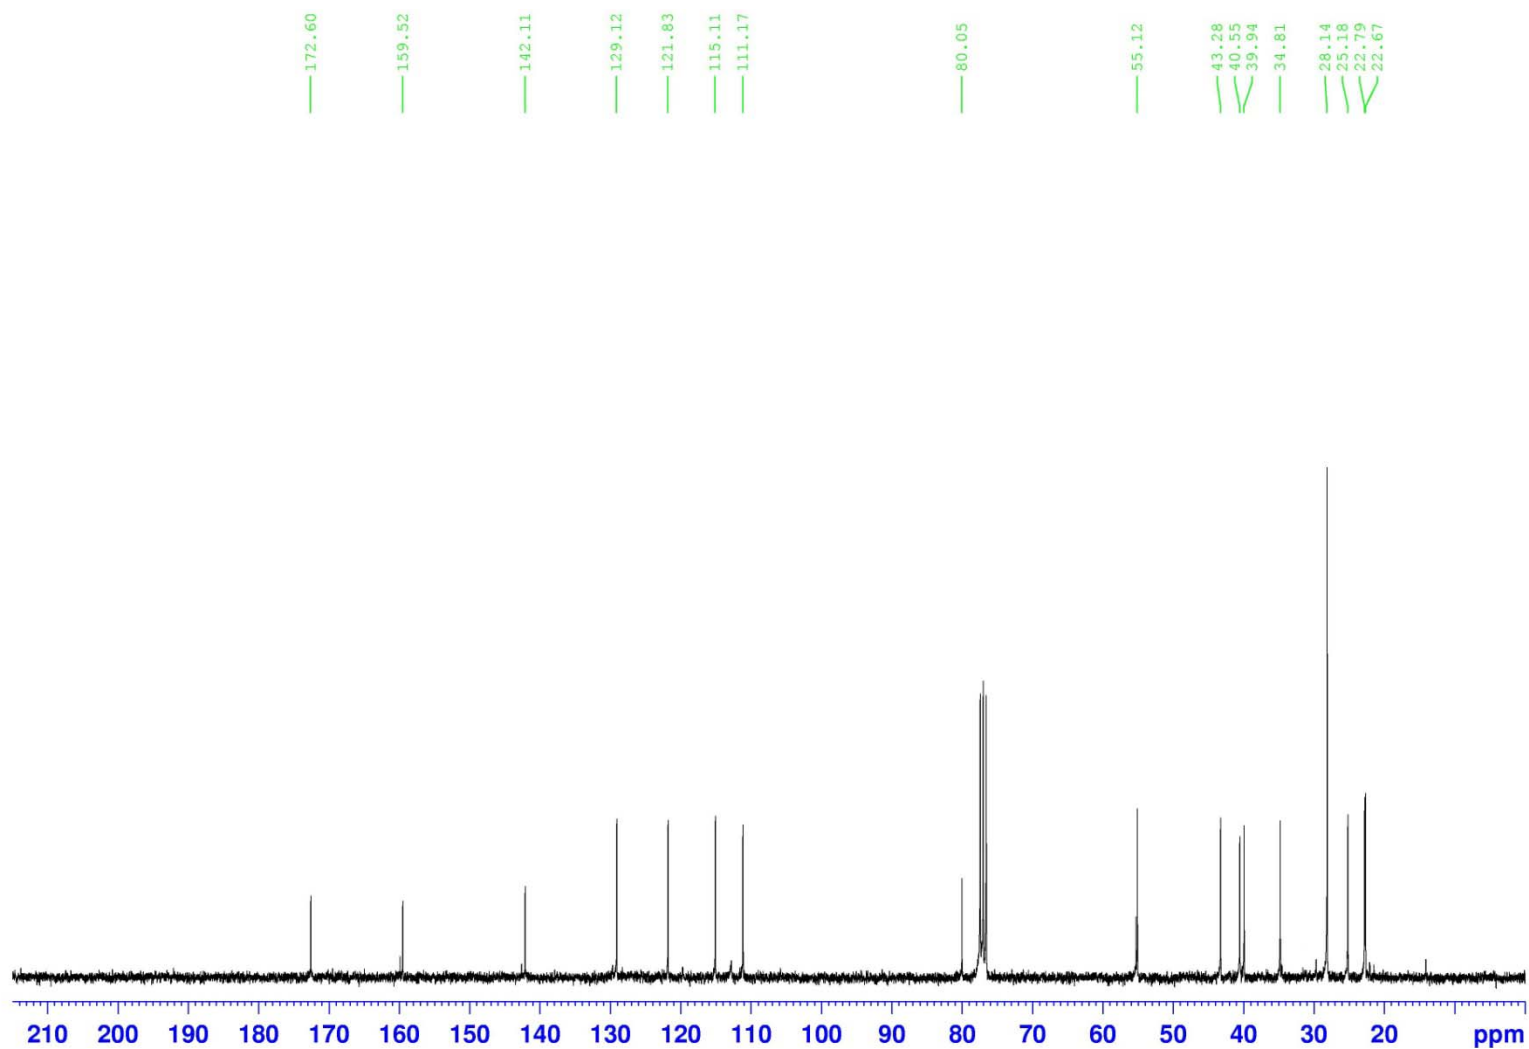

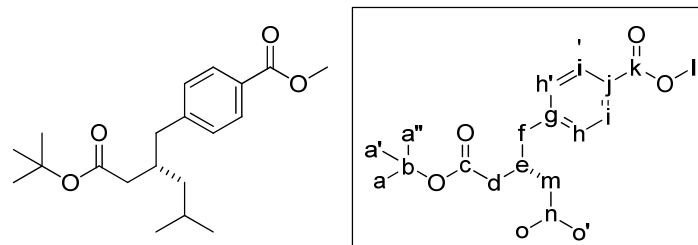

Following the general procedure for the palladium catalyzed C-C cross-coupling of trifluoroborate salts with (*R*)-**10i** affords, after flash chromatography on silica gel (98:2 hexanes:ethyl acetate), the title compound (94%) as a colorless oil.

|                                                       |                                                                                                                                                                                                                                                                                         |
|-------------------------------------------------------|-----------------------------------------------------------------------------------------------------------------------------------------------------------------------------------------------------------------------------------------------------------------------------------------|
| <b>Optical rotation</b>                               | $[\alpha]_{\text{D}}^{20} = +4.1^{\circ}$ ( <i>c</i> 0.5, CHCl <sub>3</sub> )                                                                                                                                                                                                           |
| <b>TLC analysis</b>                                   | <i>R<sub>f</sub></i> 0.7 (90:10 hexanes:ethyl acetate)                                                                                                                                                                                                                                  |
| <b><sup>1</sup>H NMR (400 MHz, CDCl<sub>3</sub>)</b>  | δ 7.97 (2H, d, <i>J</i> = 8.1 Hz, i,i'), 7.26 (2H, d, <i>J</i> = 8.1 Hz, h,h'), 3.92 (3H, s, l), 2.75–2.60 (2H, m, f), 2.30–2.15 (1H, m, e), 2.15–2.10 (2H, m, d), 1.75–1.60 (1H, m, n), 1.46 (9H, s, a,a',a''), 1.20–1.10 (2H, m, m), 0.88 (6H, dd, <i>J</i> = 21.3 Hz, 6.5 Hz, o,o'). |
| <b><sup>13</sup>C NMR (100 MHz, CDCl<sub>3</sub>)</b> | δ 172.35 (c), 167.16 (k), 146.17 (g), 129.57 (i,i'), 129.37 (h,h'), 127.96 (j), 80.24 (b), 51.98 (l), 43.19 (m), 40.58 (f), 39.78 (d), 34.80 (e), 28.13 (a,a',a''), 25.15 (n), 22.82 and 22.51 (o,o').                                                                                  |
| <b>IR (neat)</b>                                      | 2955, 1726 (C=O stretch), 1600, 1584, 1488, 1455, 1366 (C-O stretch), 1260, 1150, 1047, 851, 777 cm <sup>-1</sup> .                                                                                                                                                                     |
| <b>HRMS (ESI)</b>                                     | Calcd. for C <sub>20</sub> H <sub>30</sub> NaO <sub>4</sub> (M+Na): 357.2042, found 357.2028 <i>m/z</i> .                                                                                                                                                                               |

**<sup>1</sup>H NMR of (*S*)-3-(4-methylcarboxyphenyl)methyl-5-methylhexanoic acid *tert*-butyl ester**

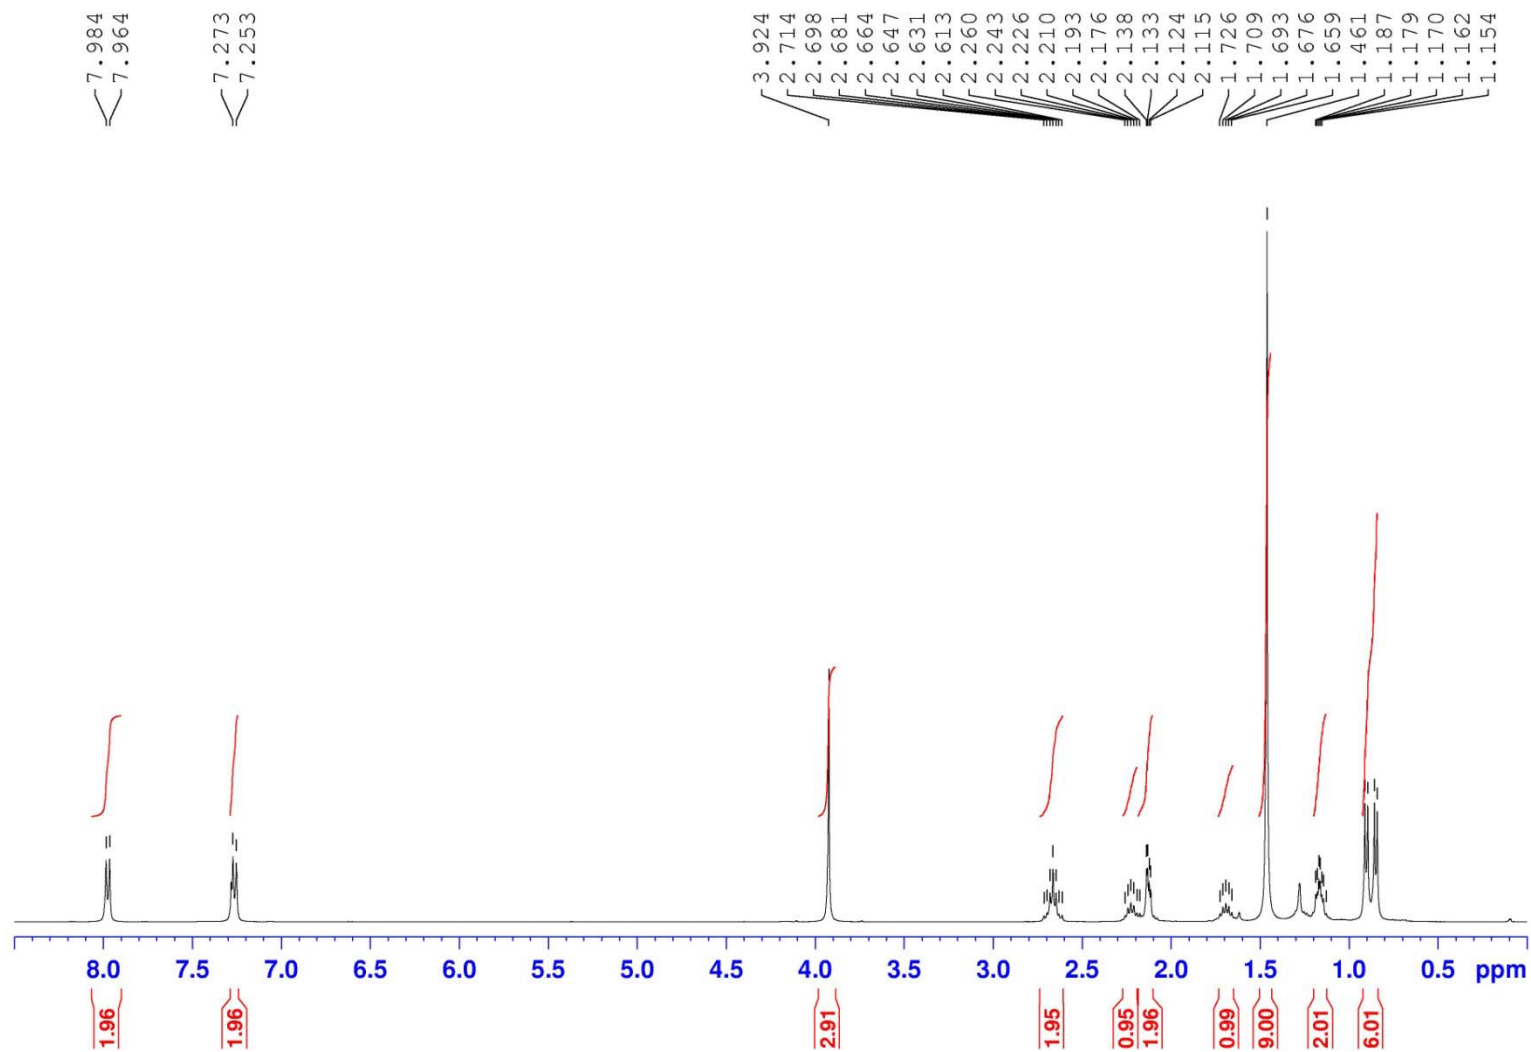

**$^{13}\text{C}$  NMR of (*S*)-3-(4-methylcarboxyphenyl)methyl-5-methylhexanoic acid *tert*-butyl ester**

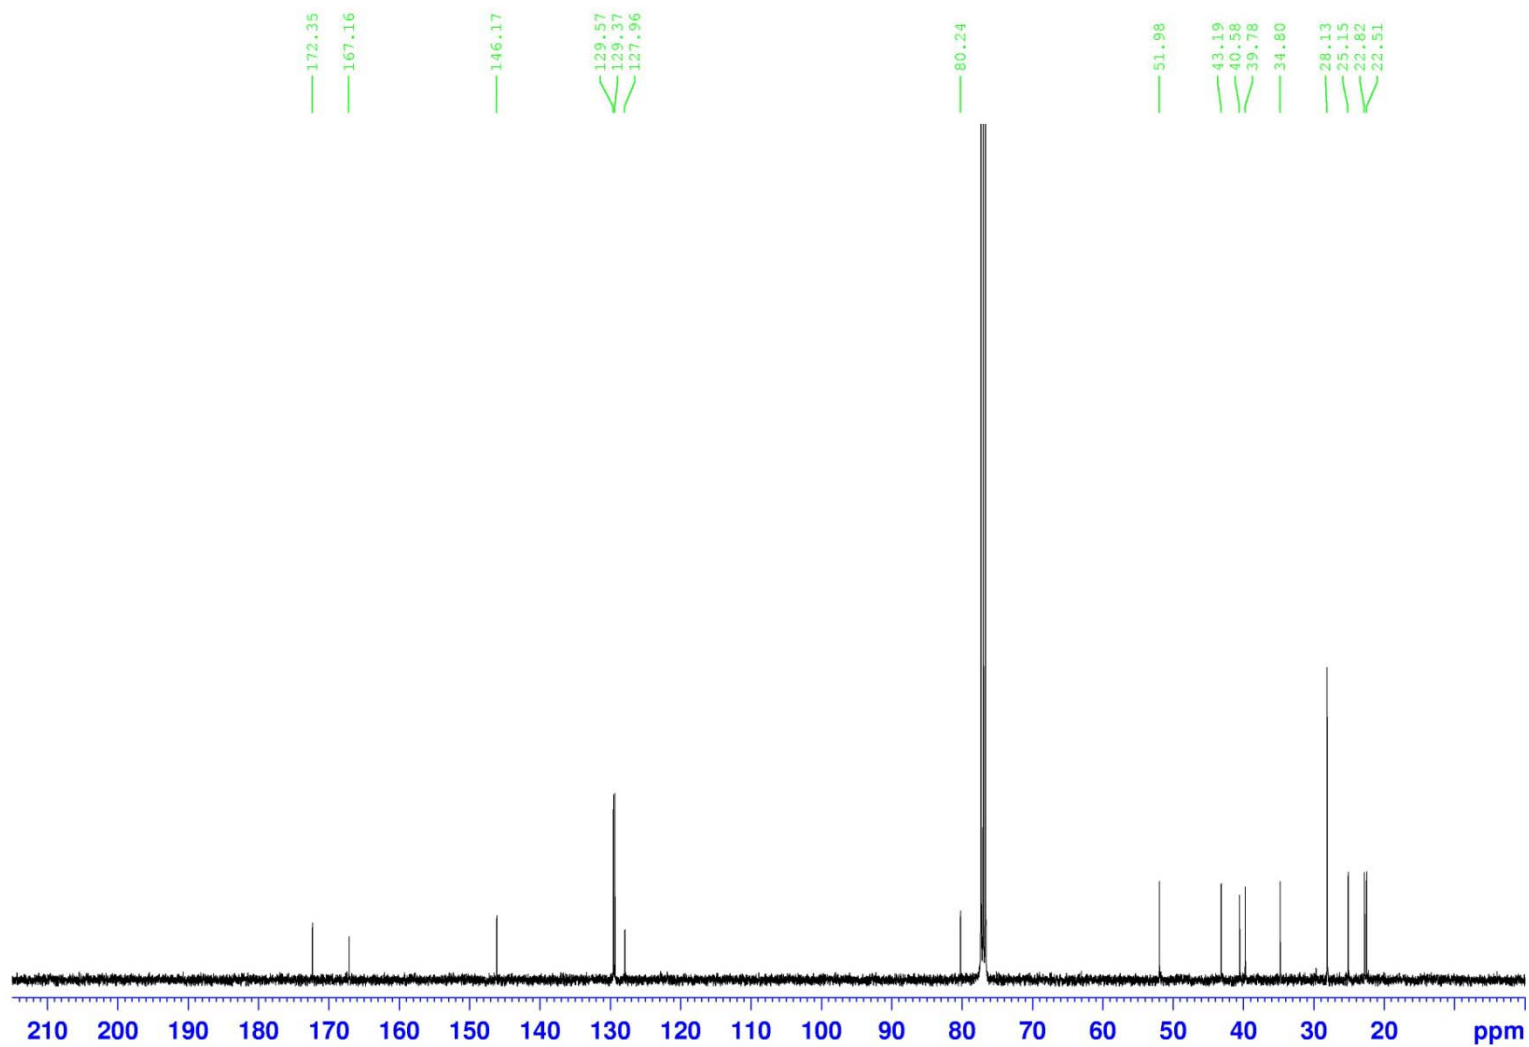

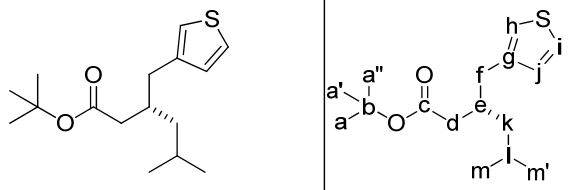

Following the general procedure for the palladium catalyzed C-C cross-coupling of trifluoroborate salts with (*R*)-**10i** affords, after flash chromatography on silica gel (98:2 hexanes:ethyl acetate), the title compound (98%) as a yellow oil.

|                                                       |                                                                                                                                                                                                                                                                                                                     |
|-------------------------------------------------------|---------------------------------------------------------------------------------------------------------------------------------------------------------------------------------------------------------------------------------------------------------------------------------------------------------------------|
| <b>Optical rotation</b>                               | $[\alpha]_{\text{D}}^{20} = +1.9^{\circ}$ ( <i>c</i> 0.5, CHCl <sub>3</sub> )                                                                                                                                                                                                                                       |
| <b>TLC analysis</b>                                   | $R_f$ 0.6 (90:10 hexanes:ethyl acetate)                                                                                                                                                                                                                                                                             |
| <b><sup>1</sup>H NMR (400 MHz, CDCl<sub>3</sub>)</b>  | $\delta$ 7.30–7.20 (1H, m, i), 7.00–6.90 (2H, m, h,j), 2.69 (1H, dd, <i>J</i> = 14.1 Hz, 5.6 Hz, f), 2.62 (1H, dd, <i>J</i> = 14.1 Hz, 6.7 Hz, f), 2.25–2.15 (1H, m, e), 2.15–2.05 (2H, m, d), 1.80–1.65 (1H, m, l), 1.48 (9H, s, a,a',a''), 1.25–1.10 (2H, m, k), 0.91 (6H, dd, <i>J</i> = 12.4 Hz, 6.6 Hz, m,m'). |
| <b><sup>13</sup>C NMR (100 MHz, CDCl<sub>3</sub>)</b> | $\delta$ 172.61 (c), 140.49 (g), 128.87 (j), 125.09 (i), 121.41 (h), 80.10 (b), 43.30 (k), 40.02 (d), 34.59 (f), 34.22 (e), 25.20 (a,a',a''), 25.20 (l), 22.77 and 22.72 (m,m').                                                                                                                                    |
| <b>IR (neat)</b>                                      | 2956, 2928, 1725 (C=O stretch), 1455, 1391, 1366 (C-O stretch), 1298, 1255, 1146, 851, 772 cm <sup>-1</sup> .                                                                                                                                                                                                       |
| <b>HRMS (EI)</b>                                      | Calcd. for C <sub>16</sub> H <sub>26</sub> OS: 282.1653, found 282.1652 <i>m/z</i> .                                                                                                                                                                                                                                |

**<sup>1</sup>H NMR of (S)-5-methyl-3-(thiophen-3-yl)methylhexanoic acid *tert*-butyl ester**

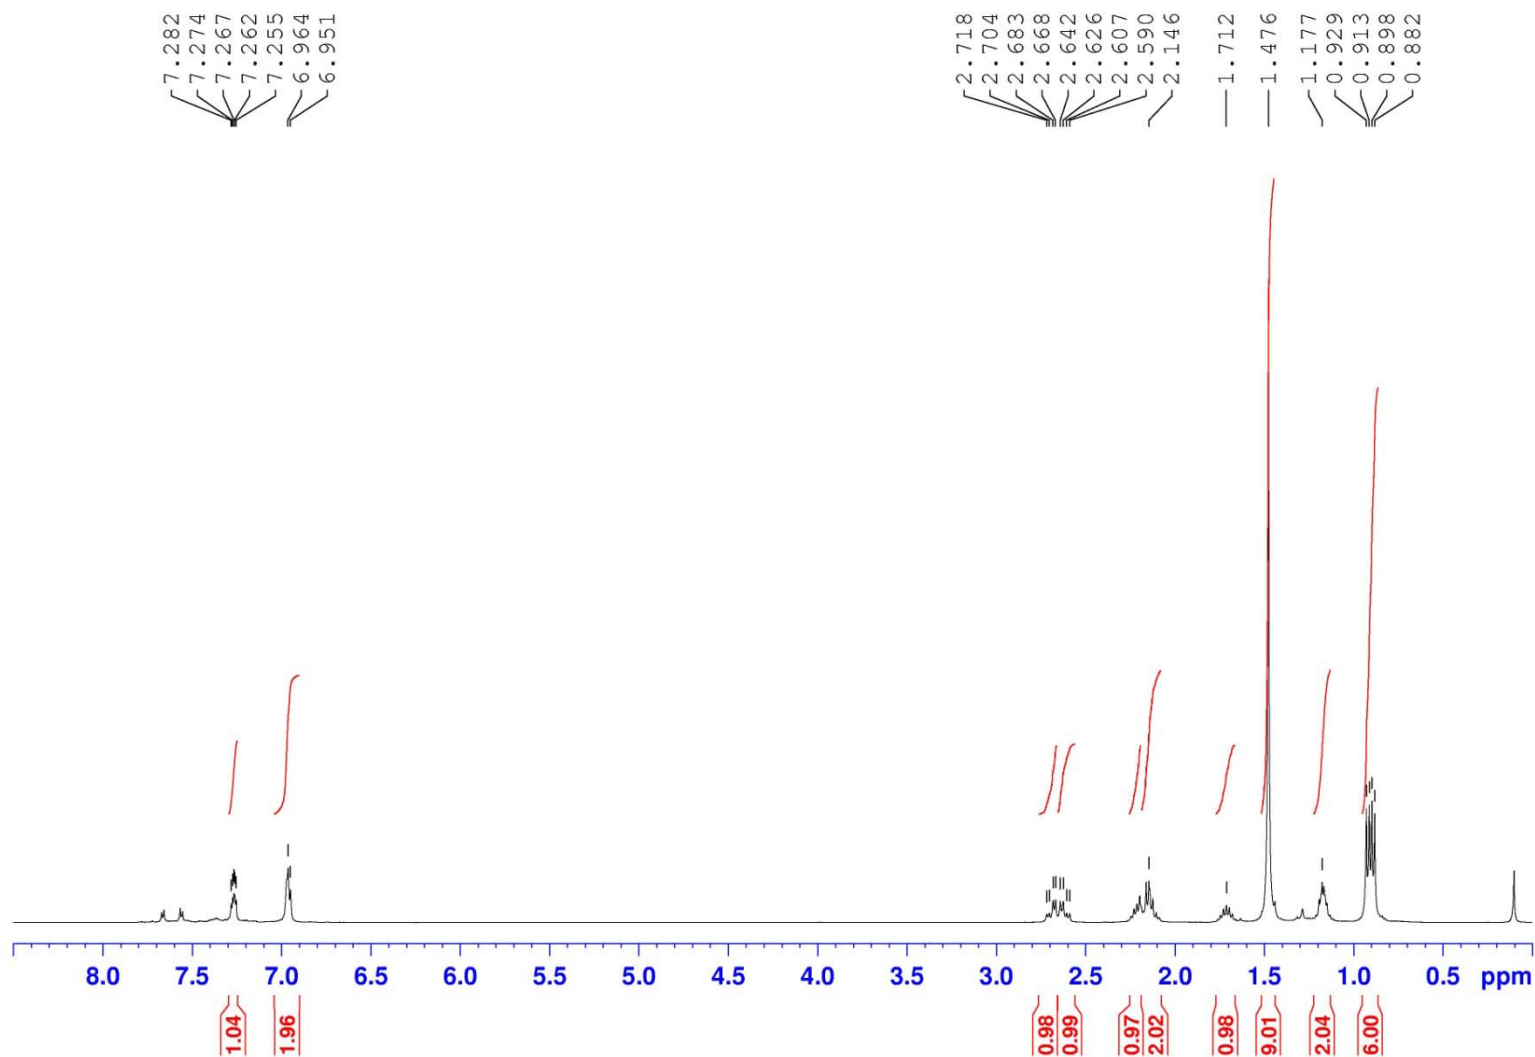

**$^{13}\text{C}$  NMR of (*S*)-5-methyl-3-(thiophen-3-yl)methylhexanoic acid *tert*-butyl ester**

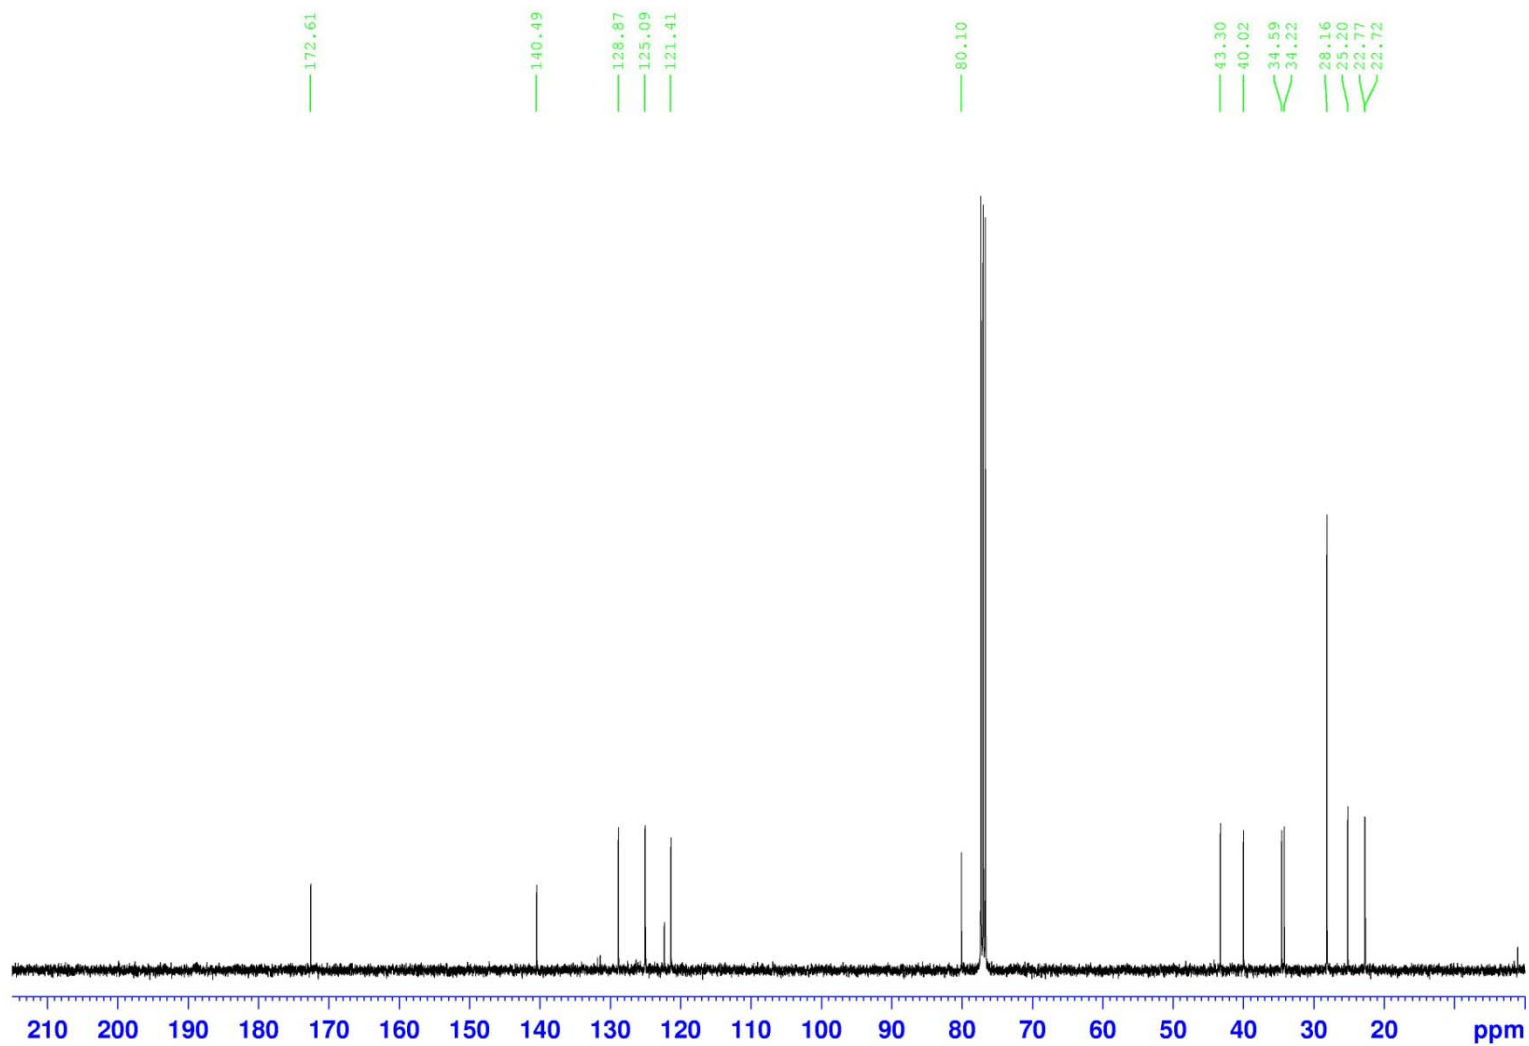



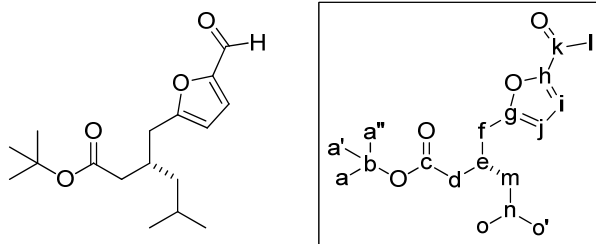

Following the general procedure for the palladium catalyzed C-C cross-coupling of trifluoroborate salts with (*R*)-**10i** affords, after flash chromatography on silica gel (96:4 hexanes:ethyl acetate), the title compound (84%) as a yellow oil.

|                                                       |                                                                                                                                                                                                                                                                                     |
|-------------------------------------------------------|-------------------------------------------------------------------------------------------------------------------------------------------------------------------------------------------------------------------------------------------------------------------------------------|
| <b>Optical rotation</b>                               | $[\alpha]_{\text{D}}^{20} = +4.3^{\circ}$ ( <i>c</i> 0.5, CHCl <sub>3</sub> )                                                                                                                                                                                                       |
| <b>TLC analysis</b>                                   | <i>R<sub>f</sub></i> 0.40 (90:10 hexanes:ethyl acetate)                                                                                                                                                                                                                             |
| <b><sup>1</sup>H NMR (400 MHz, CDCl<sub>3</sub>)</b>  | δ 9.55 (1H, s, l), 7.21 (1H, d, <i>J</i> = 3.3 Hz, i), 6.31 (1H, d, <i>J</i> = 3.3 Hz, j), 2.80–2.70 (2H, m, f), 2.40–2.25 (1H, m, e), 2.25–2.15 (2H, m, d), 1.75–1.60 (1H, m, n), 1.46 (9H, s, a, a', a''), 1.25–1.10 (2H, m, m), 0.90 (6H, dd, <i>J</i> = 8.3 Hz, 6.9 Hz, o, o'). |
| <b><sup>13</sup>C NMR (100 MHz, CDCl<sub>3</sub>)</b> | δ 177.17 (k), 172.00 (c), 162.14 (g), 152.04 (h), 110.32 (j), 80.56 (b), 43.28 (m), 39.78 (d), 32.86 (f), 32.43 (e), 28.11 (a, a', a''), 25.17 (l), 22.72 and 22.59 (o, o').                                                                                                        |
| <b>IR (neat)</b>                                      | 2956, 1723 (C=O stretch), 1680 (C=O stretch), 1516, 1468, 1368 (C-O stretch), 1255, 1152, 1023, 960, 755 cm <sup>-1</sup> .                                                                                                                                                         |
| <b>HRMS (EI)</b>                                      | Calcd. for C <sub>17</sub> H <sub>26</sub> NaO <sub>4</sub> (M+Na): 317.1729, found 317.1735 <i>m/z</i> .                                                                                                                                                                           |

**<sup>1</sup>H NMR of (S)-3-(5-acetylfuran-2-yl)methyl-5-methylhexanoic acid *tert*-butyl ester**

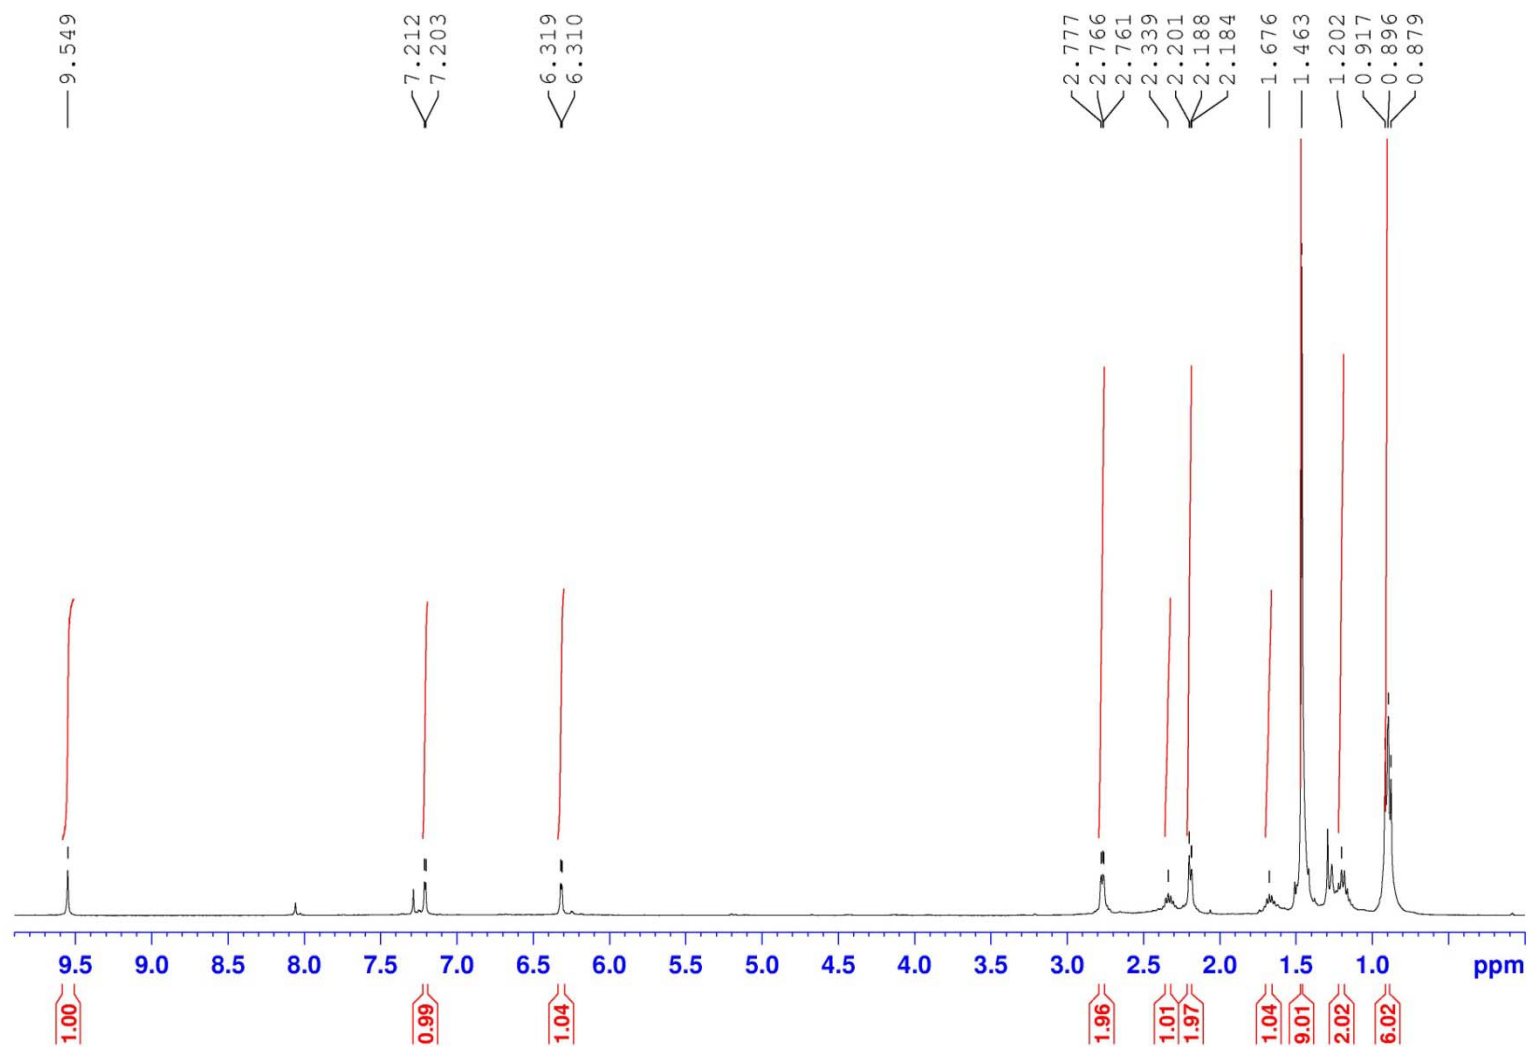

**$^{13}\text{C}$  NMR of (*S*)-3-(5-acetylfuran-2-yl)methyl-5-methylhexanoic acid *tert*-butyl ester**

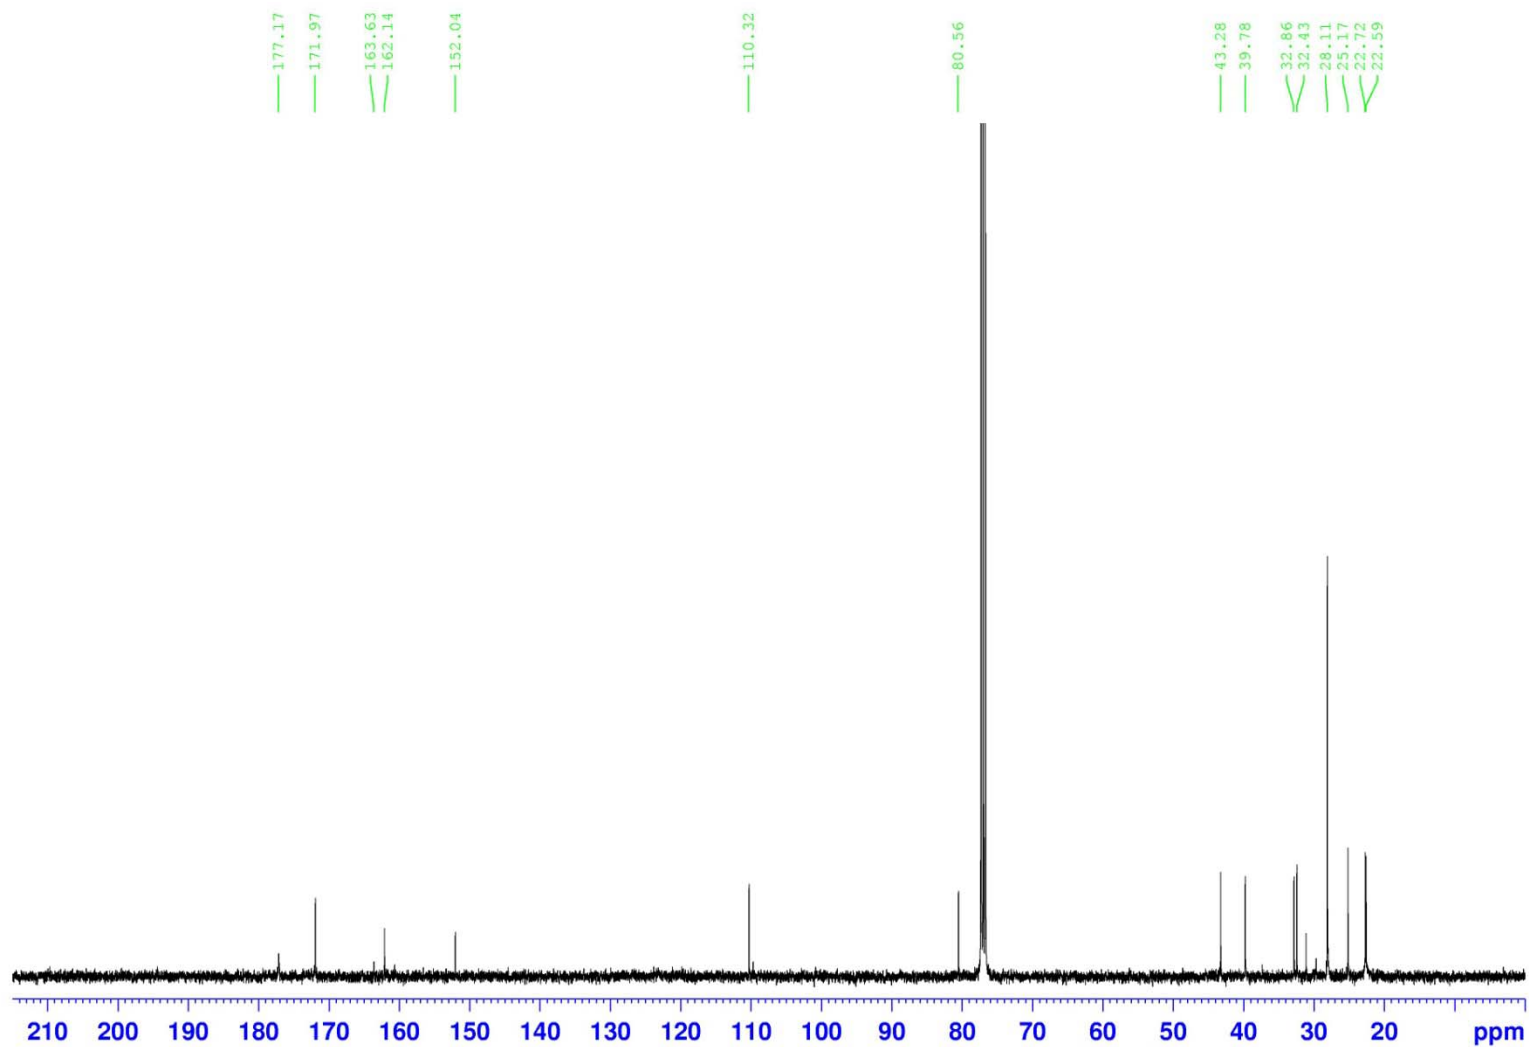

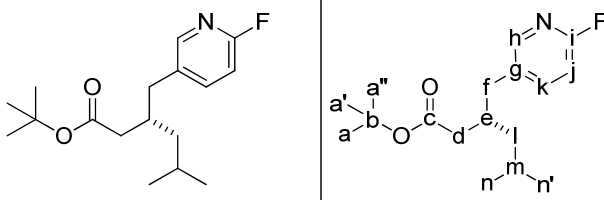

Following the general procedure for the palladium catalyzed C-C cross-coupling of trifluoroborate salts with (R)-**10i** affords, after flash chromatography on silica gel (92:8 hexanes:ethyl acetate), the title compound (51%) as a colorless oil.

|                                                      |                                                                                                                                                                                                                                                                                               |
|------------------------------------------------------|-----------------------------------------------------------------------------------------------------------------------------------------------------------------------------------------------------------------------------------------------------------------------------------------------|
| <b>Optical rotation</b>                              | $[\alpha]_{\text{D}}^{20} = +3.8^{\circ}$ ( <i>c</i> 0.5, CHCl <sub>3</sub> )                                                                                                                                                                                                                 |
| <b>TLC analysis</b>                                  | <i>R<sub>f</sub></i> 0.6 (90:10 hexanes:ethyl acetate)                                                                                                                                                                                                                                        |
| <b><sup>1</sup>H NMR (300 MHz, CDCl<sub>3</sub>)</b> | δ 8.02 (1H, s, k), 7.63 (1H, td, <i>J</i> = 8.1 Hz, 2.5 Hz, h), 6.88 (1H, dd, <i>J</i> = 8.3 Hz, 2.9 Hz, i), 2.61 (2H, d, <i>J</i> = 6.0 Hz, f), 2.20–2.05 (3H, m, d,e), 1.80–1.55 (1H, m, m), 1.46 (9H, s, a,a',a''), 1.20–1.10 (2H, m, l), 0.88 (6H, dd, <i>J</i> = 15.9 Hz, 6.5 Hz, n,n'). |
| <b><sup>13</sup>C NMR (75 MHz, CDCl<sub>3</sub>)</b> | δ 172.12 (c), 163.99 (j), 147.88 and 147.69 (k), 141.88 and 141.78 (h), 139.46 (g), 109.27 and 108.78 (i), 80.43 (b), 43.98 (l), 39.42 (d), 36.55 (f), 34.65 (e), 28.12 (a,a',a''), 25.13 (m), 22.88 and 22.38 (n,n').                                                                        |
| <b>IR (neat)</b>                                     | 2958, 2929, 1724 (C=O stretch), 1593, 1484, 1451, 1394, 1367 (C-O stretch), 1249, 1201 (C-N stretch), 1109, 1024, 824, 759 cm <sup>-1</sup> .                                                                                                                                                 |
| <b>HRMS (CI)</b>                                     | Calcd. for C <sub>17</sub> H <sub>27</sub> FNO <sub>2</sub> (M+H): 296.2026, found 296.2038 <i>m/z</i> .                                                                                                                                                                                      |

**<sup>1</sup>H NMR of (*S*)-3-(6-fluoropyridin-3-yl)methyl-5-methylhexanoic acid *tert*-butyl ester**

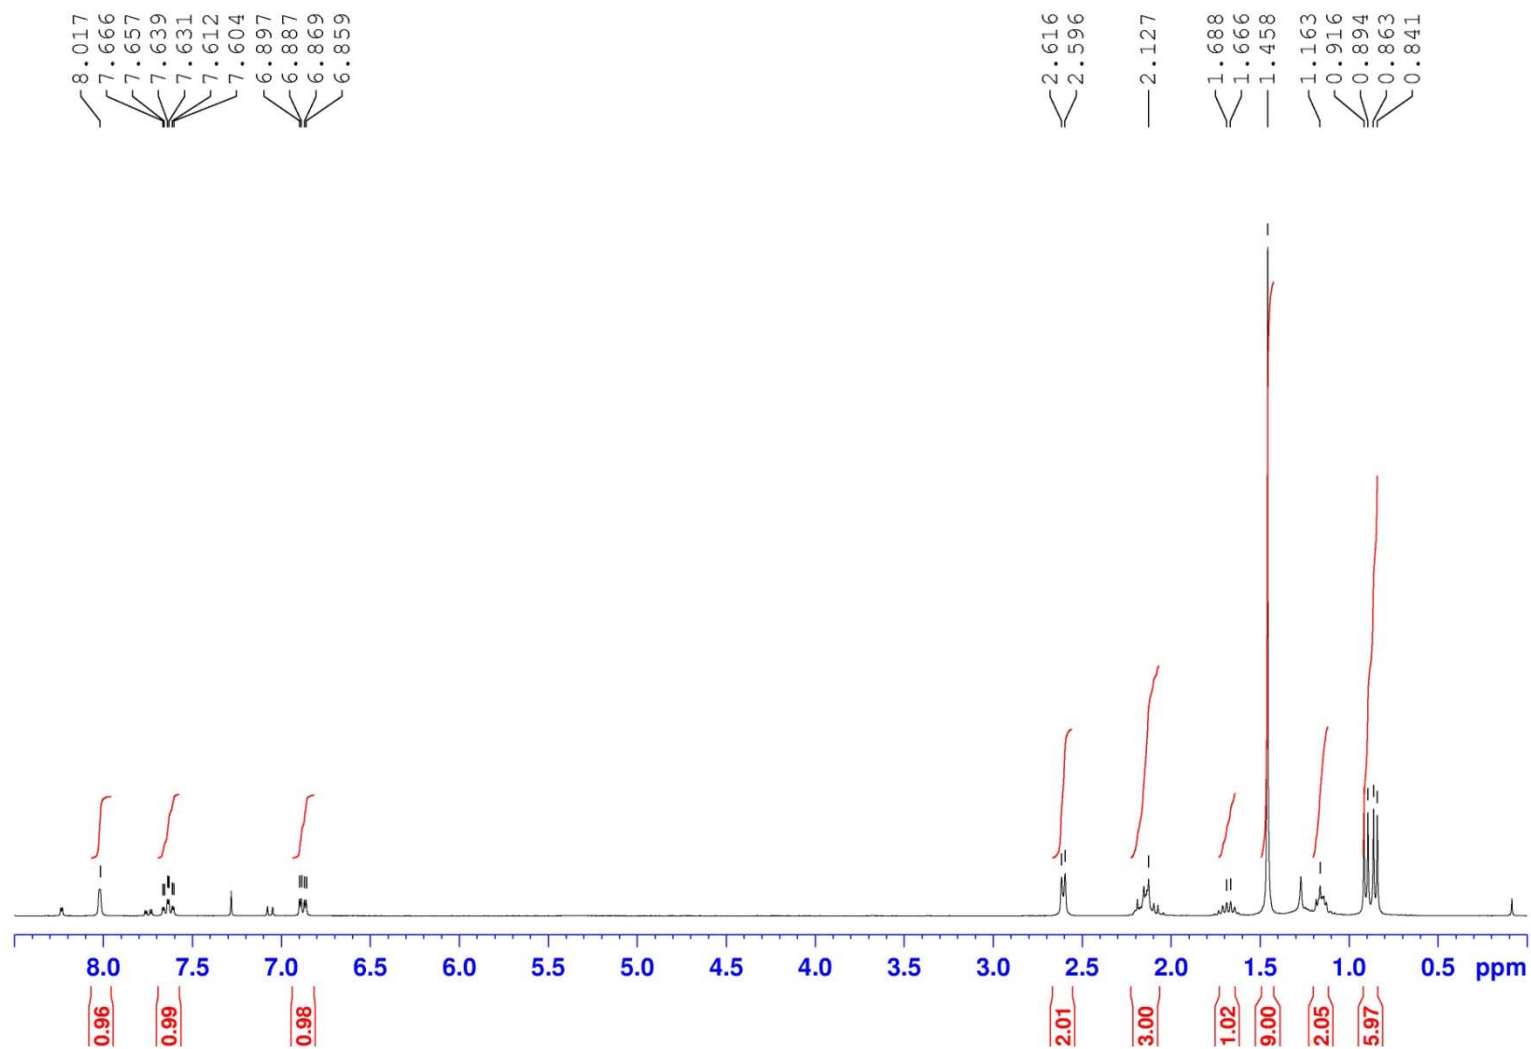

**$^{13}\text{C}$  NMR of (*S*)-3-(6-fluoropyridin-3-yl)methyl-5-methylhexanoic acid *tert*-butyl ester**

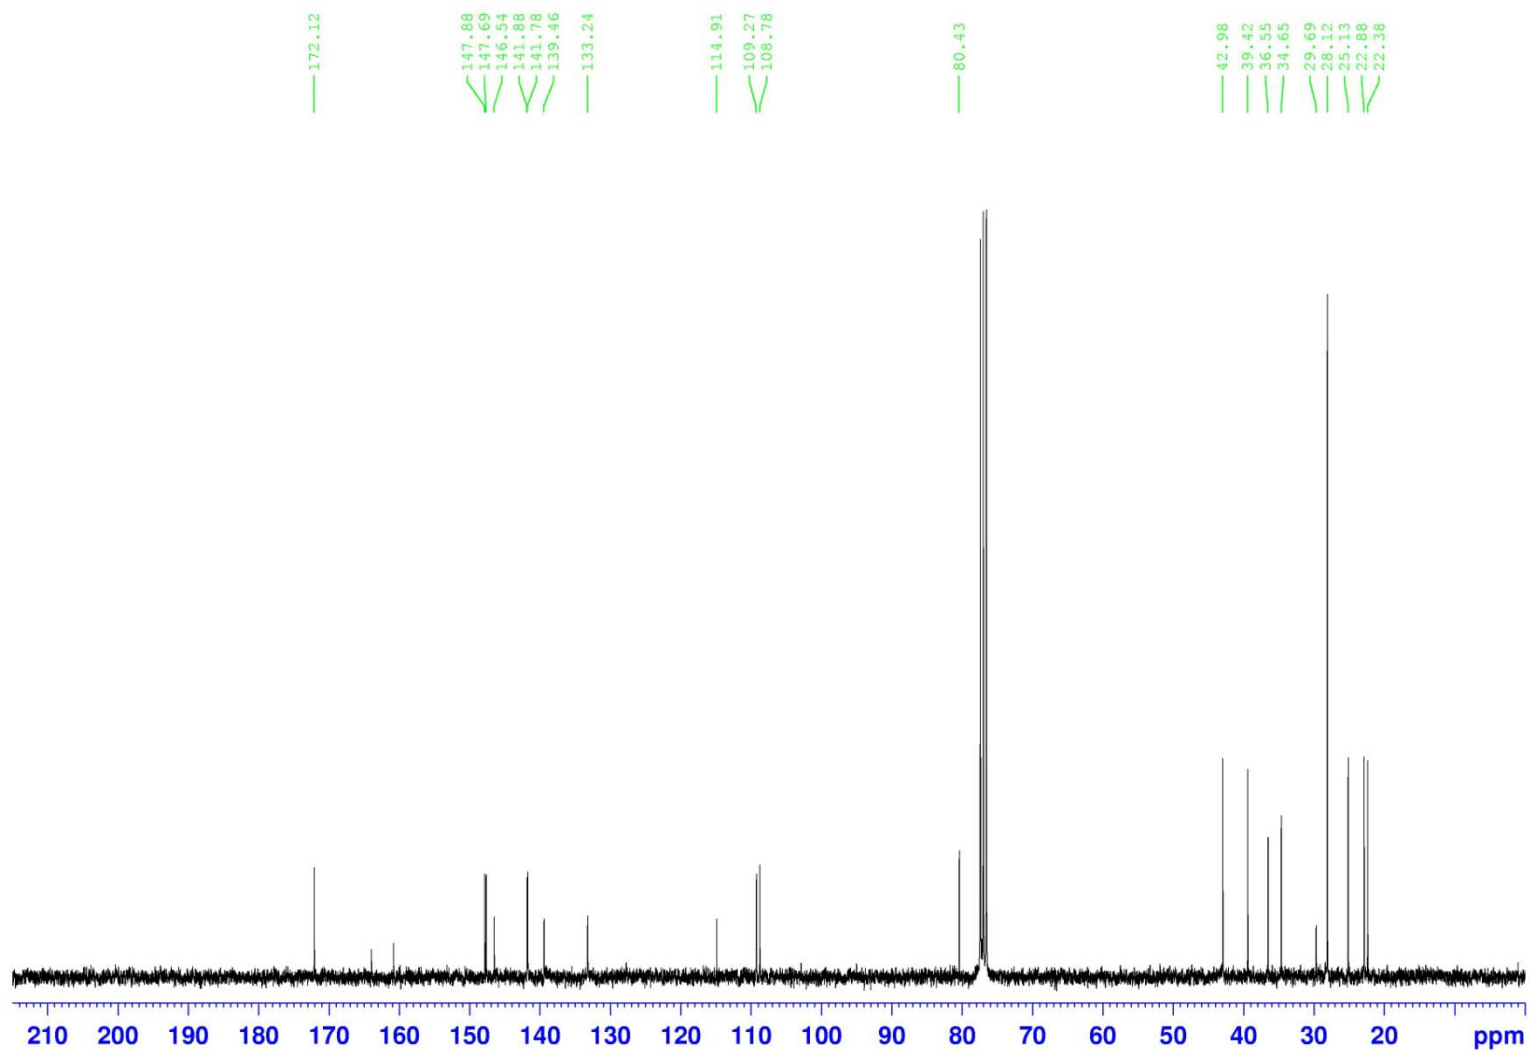

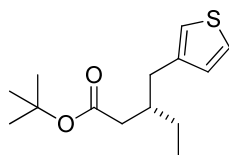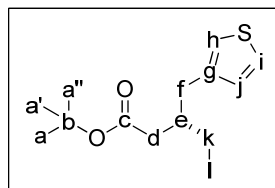

Following the general procedure for the palladium catalyzed C-C cross-coupling of trifluoroborate salts with (*R*)-**10h** affords, after flash chromatography on silica gel (98:2 hexanes:ethyl acetate), the title compound (80%) as a colorless oil.

|                                                      |                                                                                                                                                                                                                            |
|------------------------------------------------------|----------------------------------------------------------------------------------------------------------------------------------------------------------------------------------------------------------------------------|
| <b>Optical rotation</b>                              | $[\alpha]_{\text{D}}^{20} = +1.8^{\circ}$ ( <i>c</i> 0.5, CHCl <sub>3</sub> )                                                                                                                                              |
| <b>TLC analysis</b>                                  | <i>R<sub>f</sub></i> 0.6 (90:10 hexanes:ethyl acetate)                                                                                                                                                                     |
| <b><sup>1</sup>H NMR (300 MHz, CDCl<sub>3</sub>)</b> | δ 7.26 (1H, dd, <i>J</i> = 4.7 Hz, 3.2 Hz, i), 7.00–6.90 (2H, m, h,j), 2.75–2.55 (2H, m, f), 2.20–2.15 (2H, m, d), 2.15–2.00 (1H, m, e), 1.47 (9H, s, a,a',a''), 1.45–1.25 (2H, m, k), 0.94 (3H, t, <i>J</i> = 7.4 Hz, l). |
| <b><sup>13</sup>C NMR (75 MHz, CDCl<sub>3</sub>)</b> | δ 172.71 (c), 140.64 (g), 128.80 (j), 125.11 (i), 121.31 (h), 80.10 (b), 39.40 (d), 37.95 (e), 34.02 (f), 28.15 (a,a',a''), 26.13 (k), 11.01 (l).                                                                          |
| <b>IR (neat)</b>                                     | 2964, 2929, 1726 (C=O stretch), 1459, 1366 (C-O stretch), 1255, 1144, 1090, 949, 850, 766, 693 cm <sup>-1</sup> .                                                                                                          |
| <b>HRMS (FAB)</b>                                    | Calcd. for C <sub>14</sub> H <sub>22</sub> NaSO <sub>2</sub> (M+Na): 277.1238, found 277.1245 <i>m/z</i> .                                                                                                                 |

**<sup>1</sup>H NMR of (S)-3-(thiophen-3-yl)methylpentanoic acid *tert*-butyl ester**

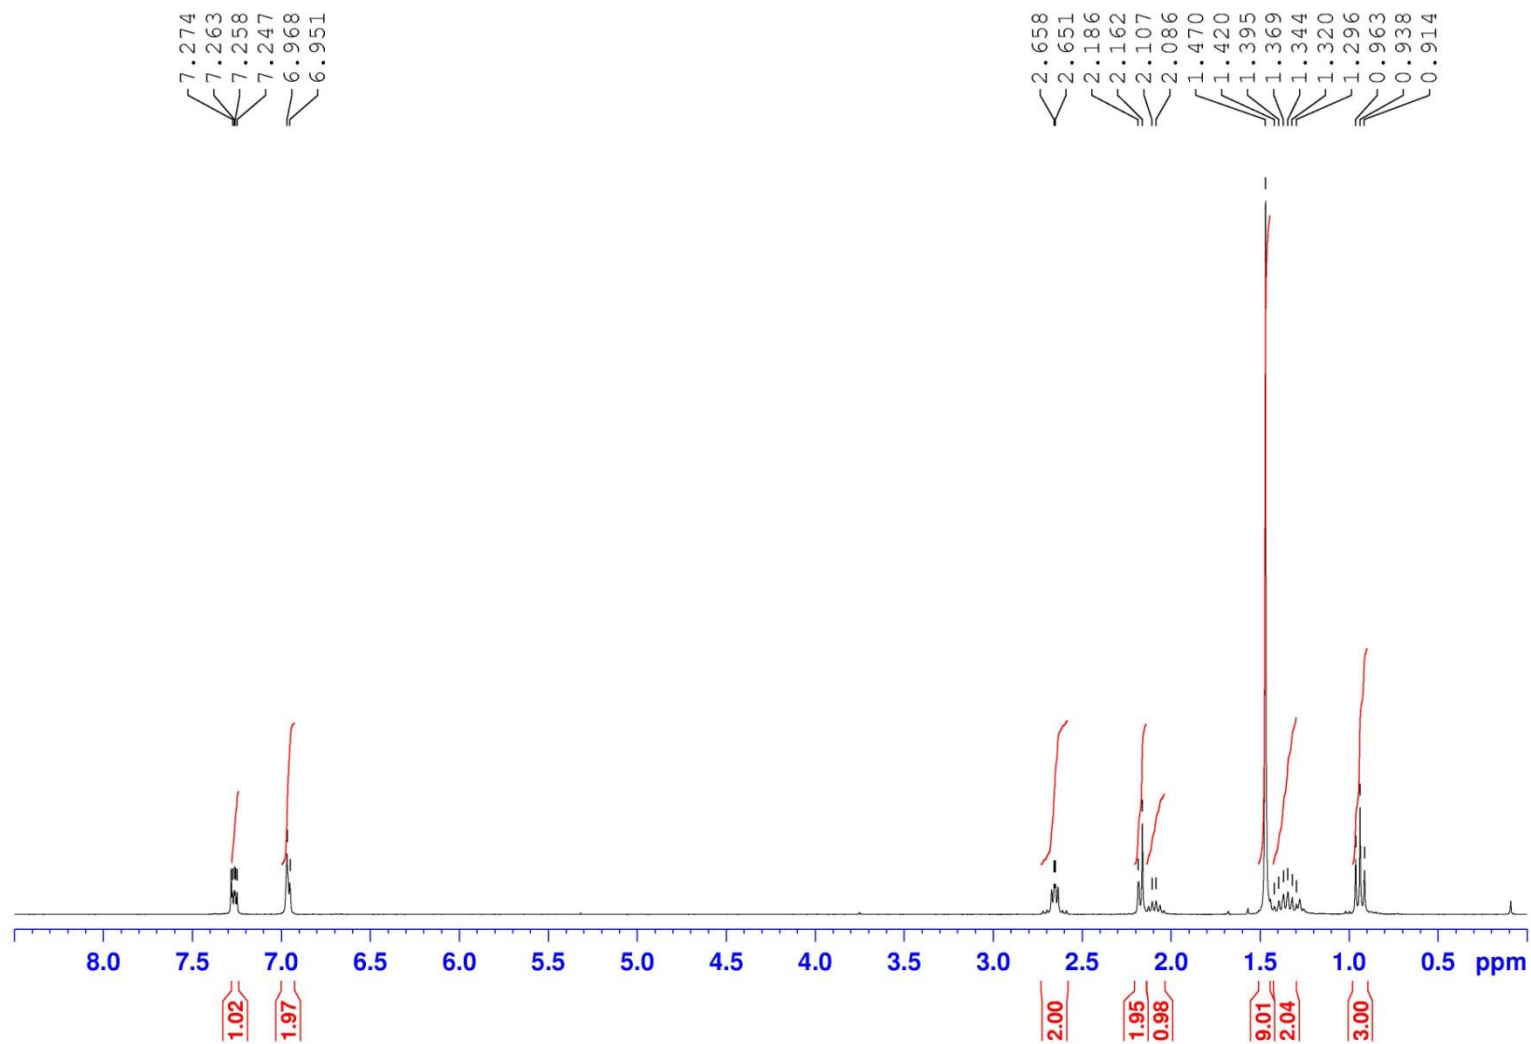



**$^{13}\text{C}$  NMR of (*S*)-3-(thiophen-3-yl)methylpentanoic acid *tert*-butyl ester**

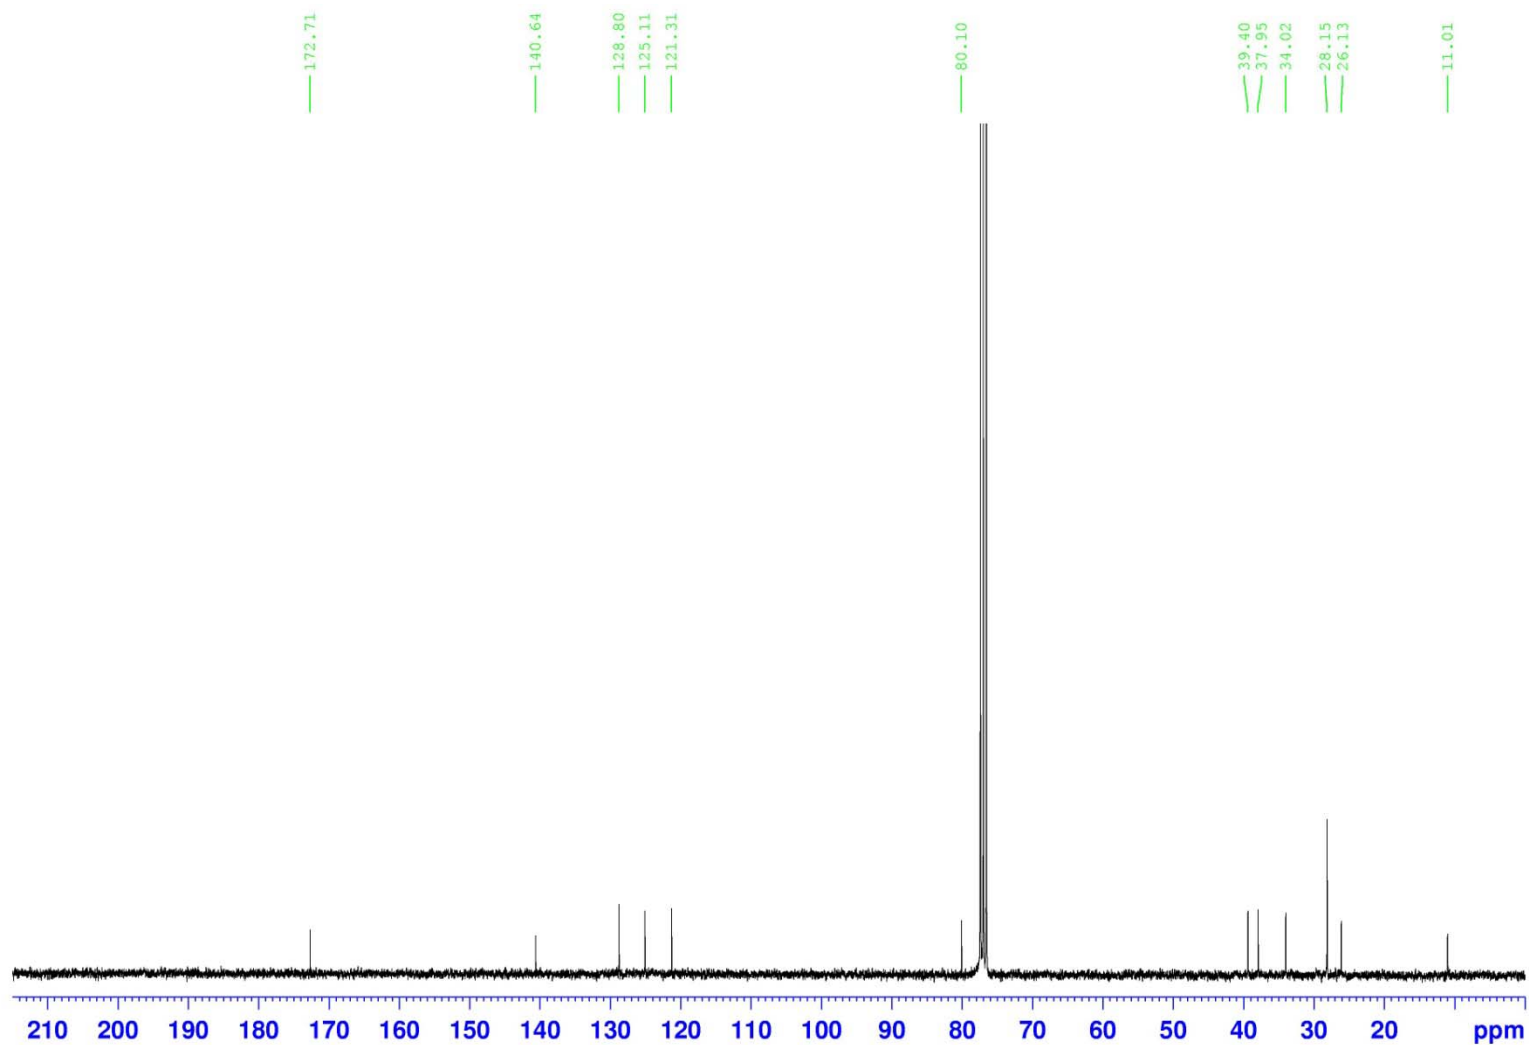

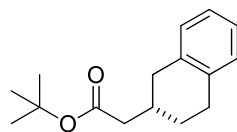

(S)-14

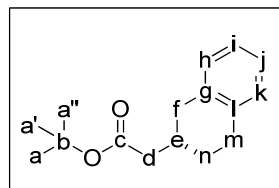

Following the general procedure for the palladium catalyzed C-C cross-coupling of trifluoroborate salts with (*R*)-5-(2-Chlorophenyl)-3-(trifluoroboratomethyl)pentanoic acid *tert*-butyl ester potassium salt affords, after flash chromatography on silica gel (97:3 hexanes:ethyl acetate), the title compound (91%) as a colorless oil.

|                                                       |                                                                                                                                                                                                 |
|-------------------------------------------------------|-------------------------------------------------------------------------------------------------------------------------------------------------------------------------------------------------|
| <b>Optical rotation</b>                               | $[\alpha]_D^{20} = +1.7^\circ$ ( <i>c</i> 0.5, CHCl <sub>3</sub> )                                                                                                                              |
| <b>TLC analysis</b>                                   | <i>R<sub>f</sub></i> 0.6 (90:10 hexanes:ethyl acetate)                                                                                                                                          |
| <b><sup>1</sup>H NMR (400 MHz, CDCl<sub>3</sub>)</b>  | δ 7.20–7.00 (4H, m, h,i,j,k), 2.95–2.80 (3H, m, f,m), 2.53 (1H, dd, <i>J</i> = 16.4 Hz, 9.9 Hz, f), 2.35–2.20 (3H, m, d,e), 2.05–1.95 (1H, m, n), 1.55–1.45 (1H, m, n), 1.50 (9H, s, a,a',a''). |
| <b><sup>13</sup>C NMR (100 MHz, CDCl<sub>3</sub>)</b> | δ 172.19 (c), 136.34 (l), 135.99 (g), 129.14 (h), 128.88 (k), 125.66 (i), 125.57 (j), 80.26 (b), 42.41 (d), 35.62 (f), 31.60 (e), 29.16 (n), 28.83 (m), 28.18 (a,a',a'').                       |
| <b>IR (neat)</b>                                      | 2977, 2925, 1728 (C=O stretch), 1495, 1453, 1366 (C-O stretch), 1289, 1255, 1146, 1064, 1039, 744 cm <sup>-1</sup> .                                                                            |
| <b>HRMS (CI)</b>                                      | Calcd. for C <sub>16</sub> H <sub>23</sub> O <sub>2</sub> (M+H): 247.1698, found 247.1693 <i>m/z</i> .                                                                                          |

**<sup>1</sup>H NMR of (S)-14**

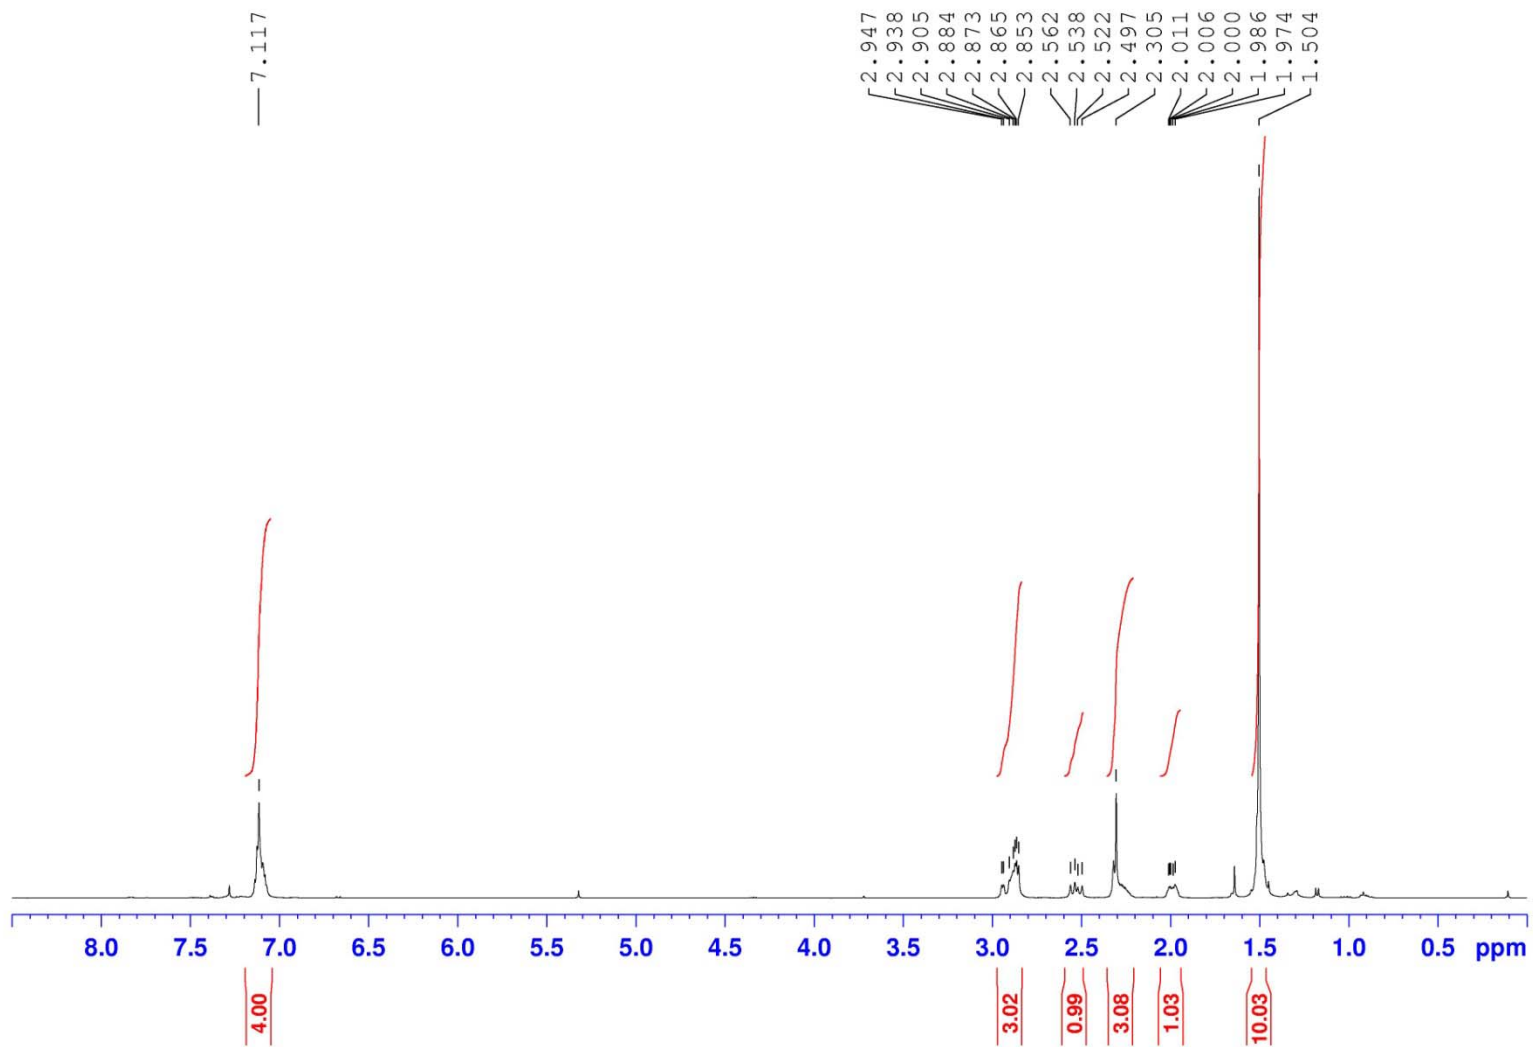

<sup>13</sup>C NMR of (S)-14

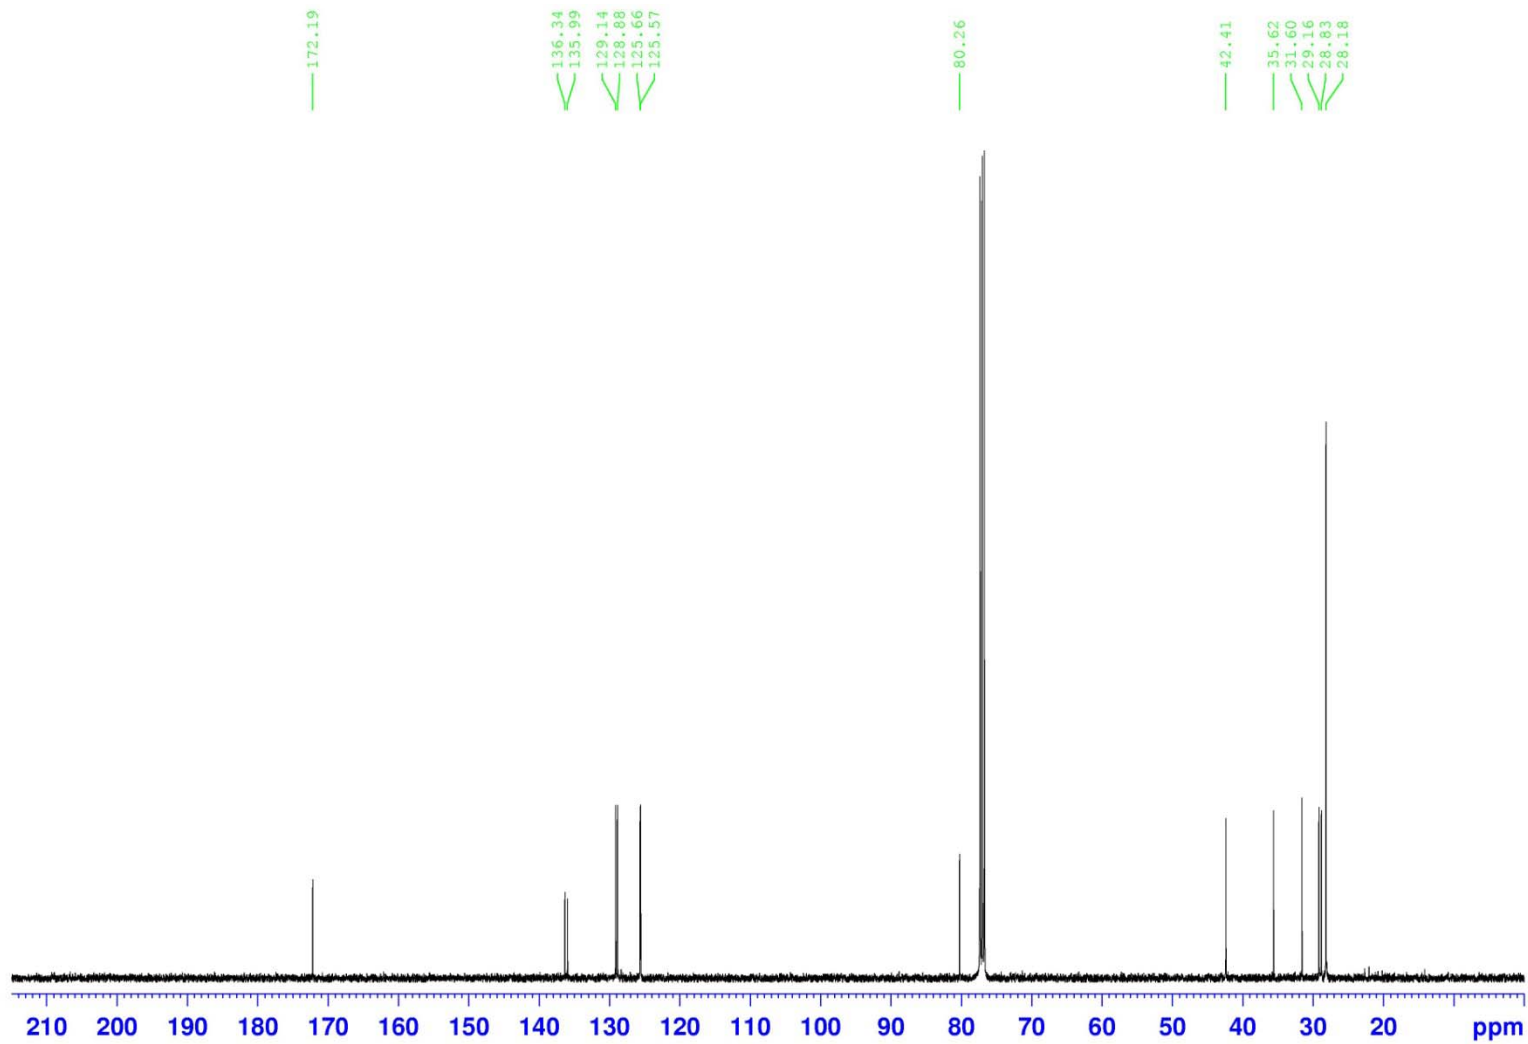

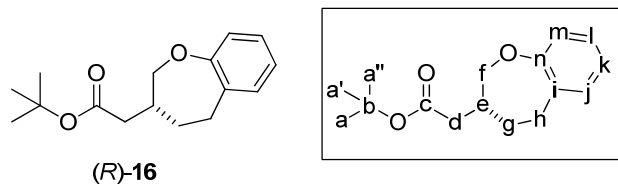

Following the general procedure for the palladium catalyzed C-O cross-coupling of (R)-15 affords, after flash chromatography on silica gel (95:5 hexane:ethyl acetate), the title compound (75%) as a colorless oil.

|                                                      |                                                                                                                                                                                                               |
|------------------------------------------------------|---------------------------------------------------------------------------------------------------------------------------------------------------------------------------------------------------------------|
| <b>Optical rotation</b>                              | $[\alpha]_{\text{D}}^{20} = +3.3^{\circ}$ ( <i>c</i> 0.5, CHCl <sub>3</sub> )                                                                                                                                 |
| <b>TLC analysis</b>                                  | <i>R<sub>f</sub></i> 0.6 (90:10 hexanes:ethyl acetate)                                                                                                                                                        |
| <b><sup>1</sup>H NMR (400 MHz, CDCl<sub>3</sub>)</b> | δ 7.40–7.25 (3H, m, m,k,j), 7.05–6.95 (1H, m, l), 4.50–4.40 (1H, m, f), 4.05–3.95 (1H, m, f), 2.85–2.75 (2H, m, h), 2.55–2.45 (1H, m, e), 2.20–2.30 (2H, m, d), 1.90–1.80 (2H, m, g), 1.47 (9H, s, a,a',a''). |
| <b><sup>13</sup>C NMR (75 MHz, CDCl<sub>3</sub>)</b> | δ 173.04 (c), 139.69 (i), 133.79 (j), 130.27 (k), 129.49 (l), 127.38 (m), 126.85 (n), 80.76 (b), 65.49 (f), 38.03 (d), 37.78 (e), 31.30 (h), 31.03 (g), 28.09 (a,a',a'').                                     |
| <b>IR (neat)</b>                                     | 2954, 1723 (C=O stretch), 1610, 1415, 1367 (C-O stretch), 1277, 1178, 1148, 1110, 1020, 760 cm <sup>-1</sup> .                                                                                                |
| <b>HRMS (CI)</b>                                     | Calcd. for C <sub>16</sub> H <sub>23</sub> O <sub>3</sub> (M+H): 263.1647, found 263.1652 <i>m/z</i> .                                                                                                        |

**<sup>1</sup>H NMR of (*R*)-16**

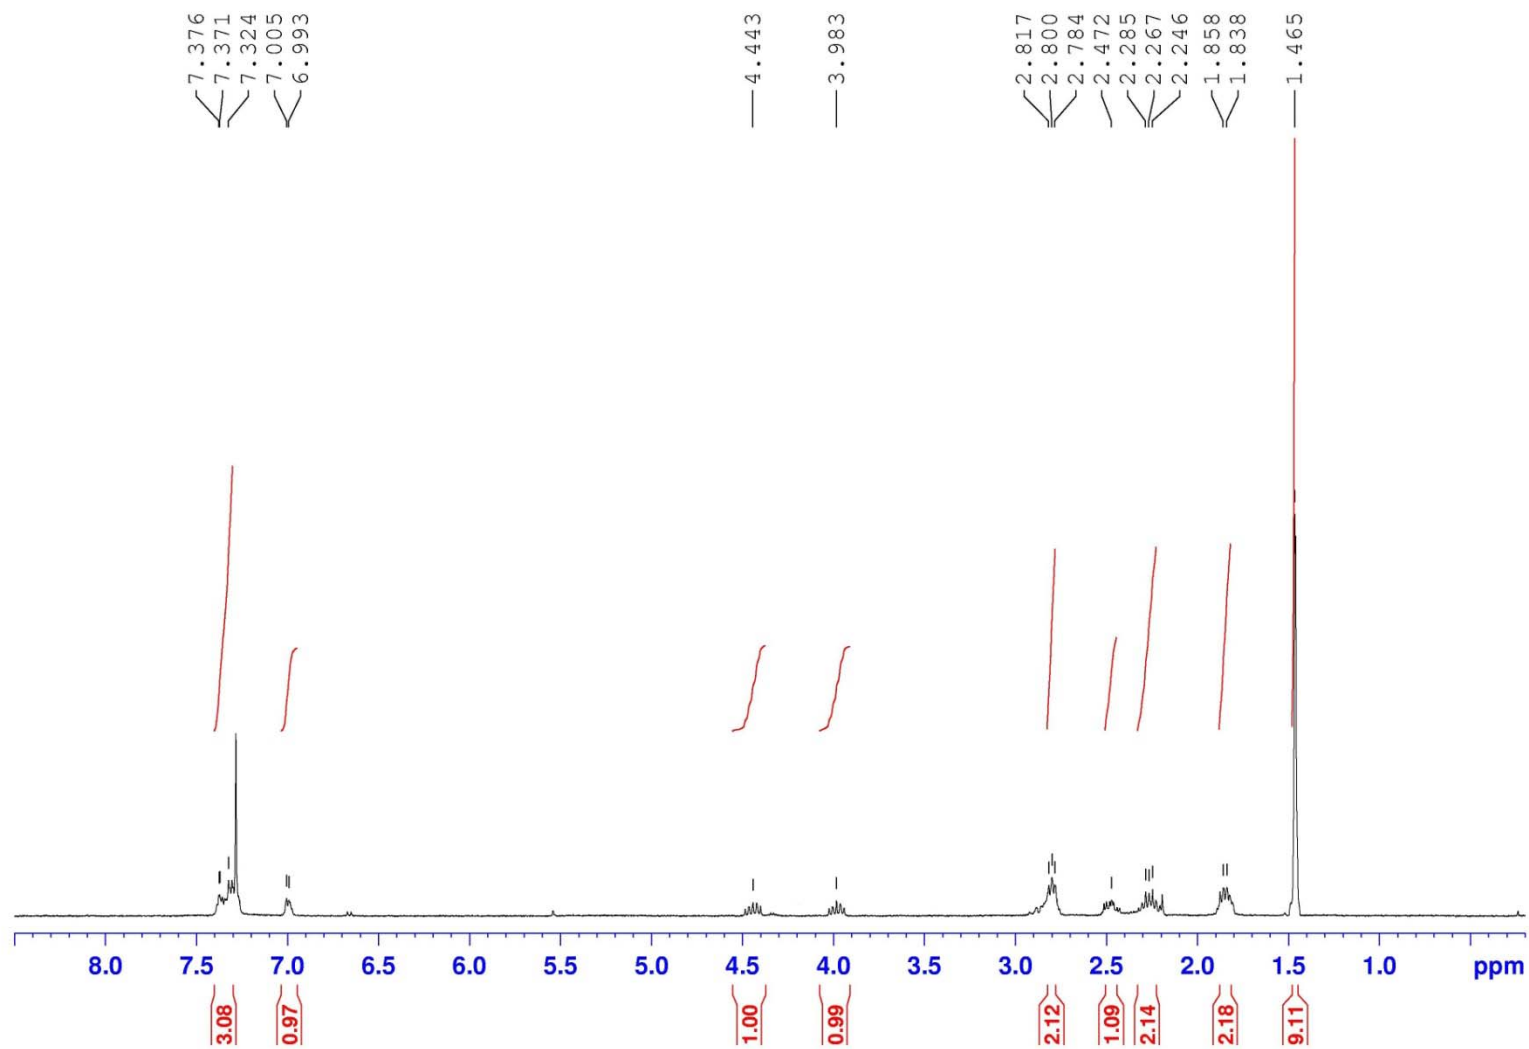

**$^{13}\text{C}$  NMR of (*R*)-16**

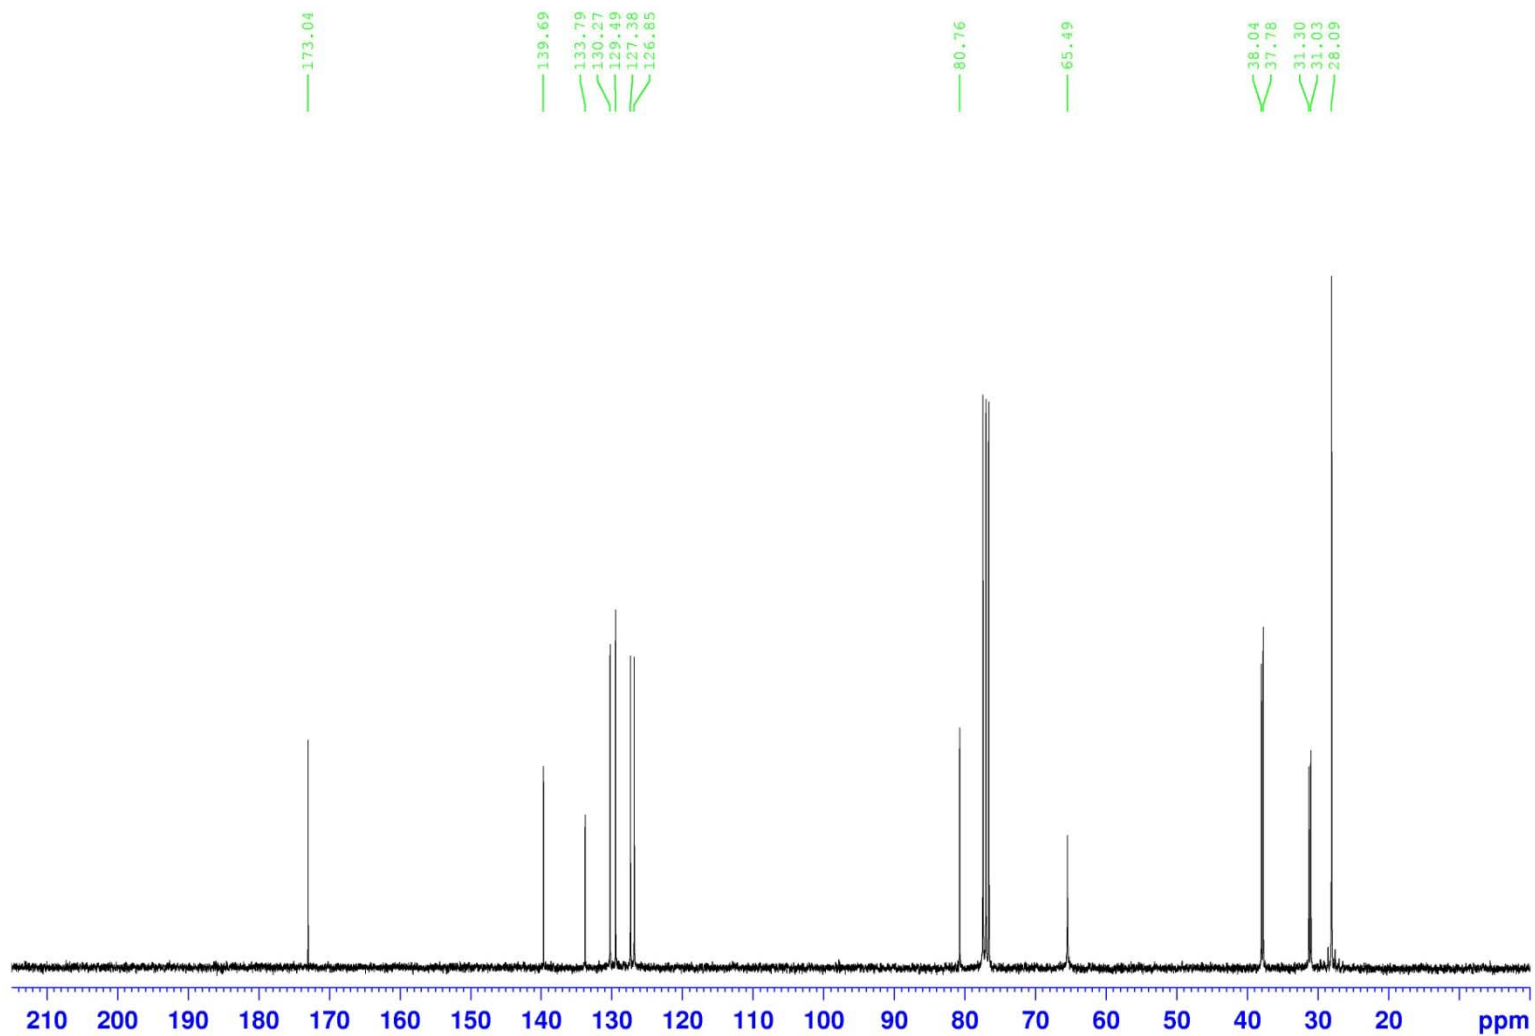

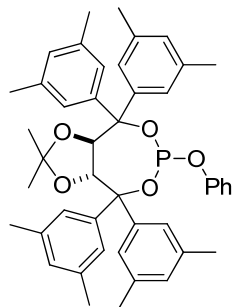

(*R,R*)-6

Following the procedure for the preparation of TADDOL-derived phosphite affords, after flash chromatography on silica gel (92:8 hexanes:ethyl acetate), the title compound (68%) as a white foamy solid.

|                                                        |                                                                                                                                                                                                                                                                                                                                                                                                                                                                |
|--------------------------------------------------------|----------------------------------------------------------------------------------------------------------------------------------------------------------------------------------------------------------------------------------------------------------------------------------------------------------------------------------------------------------------------------------------------------------------------------------------------------------------|
| <b>m.p.</b>                                            | 97–98 °C                                                                                                                                                                                                                                                                                                                                                                                                                                                       |
| <b>Optical rotation</b>                                | $[\alpha]_D^{20} = -120.0^\circ$ ( <i>c</i> 0.5, CHCl <sub>3</sub> )                                                                                                                                                                                                                                                                                                                                                                                           |
| <b>TLC analysis</b>                                    | <i>R<sub>f</sub></i> 0.80 (95:5 hexanes: ethyl acetate)                                                                                                                                                                                                                                                                                                                                                                                                        |
| <b><sup>1</sup>H NMR (400 MHz, CDCl<sub>3</sub>)</b>   | δ 7.35-7.20 (6H, m), 7.15-7.05 (5H, m), 6.99 (2H, d, <i>J</i> = 10.5 Hz), 6.90 (2H, s), 6.86 (2H, d, <i>J</i> = 7.6 Hz), 5.33 (1H, d, <i>J</i> = 8.2 Hz), 5.17 (1H, d, <i>J</i> = 8.2 Hz), 2.40 (6H, s), 2.37 (6H, s), 2.32 (6H, s), 2.92 (6H, s), 0.99 (3H, s), 0.74 (3H, s).                                                                                                                                                                                 |
| <b><sup>13</sup>C NMR (100 MHz, CDCl<sub>3</sub>)</b>  | δ 152.16 ( <i>J<sub>CP</sub></i> = 2.9 Hz), 146.10 ( <i>J<sub>CP</sub></i> = 2.0 Hz), 145.83, 141.23 (3.0 Hz), 141.02, 137.37, 136.99, 136.50, 136.29, 129.45, 129.07, 128.94, 128.78, 126.89, 126.84, 125.10, 125.08, 123.33, 120.89, 120.81, 112.65, 85.51 ( <i>J<sub>CP</sub></i> = 8.1 Hz), 84.64 ( <i>J<sub>CP</sub></i> = 4.2 Hz), 82.34 ( <i>J<sub>CP</sub></i> = 13.8 Hz), 81.28 ( <i>J<sub>CP</sub></i> = 4.8 Hz), 26.95, 26.48, 21.69, 21.59, 21.48. |
| <b><sup>31</sup>P NMR (162 MHz), CDCl<sub>3</sub>)</b> | δ 129.36.                                                                                                                                                                                                                                                                                                                                                                                                                                                      |
| <b>IR (neat)</b>                                       | 2916, 2863 (P-O ing), 1595, 1489, 1455, 1370, 1213 (C-O-C), 1159, 1035, 939, 853, 800, 761, 689 cm <sup>-1</sup> .                                                                                                                                                                                                                                                                                                                                             |
| <b>HRMS (FAB)</b>                                      | Calcd. for C <sub>45</sub> H <sub>49</sub> O <sub>5</sub> P (M+H): 701.3396, found 701.3409 <i>m/z</i> .                                                                                                                                                                                                                                                                                                                                                       |



**<sup>1</sup>H NMR of (*R,R*)-6**

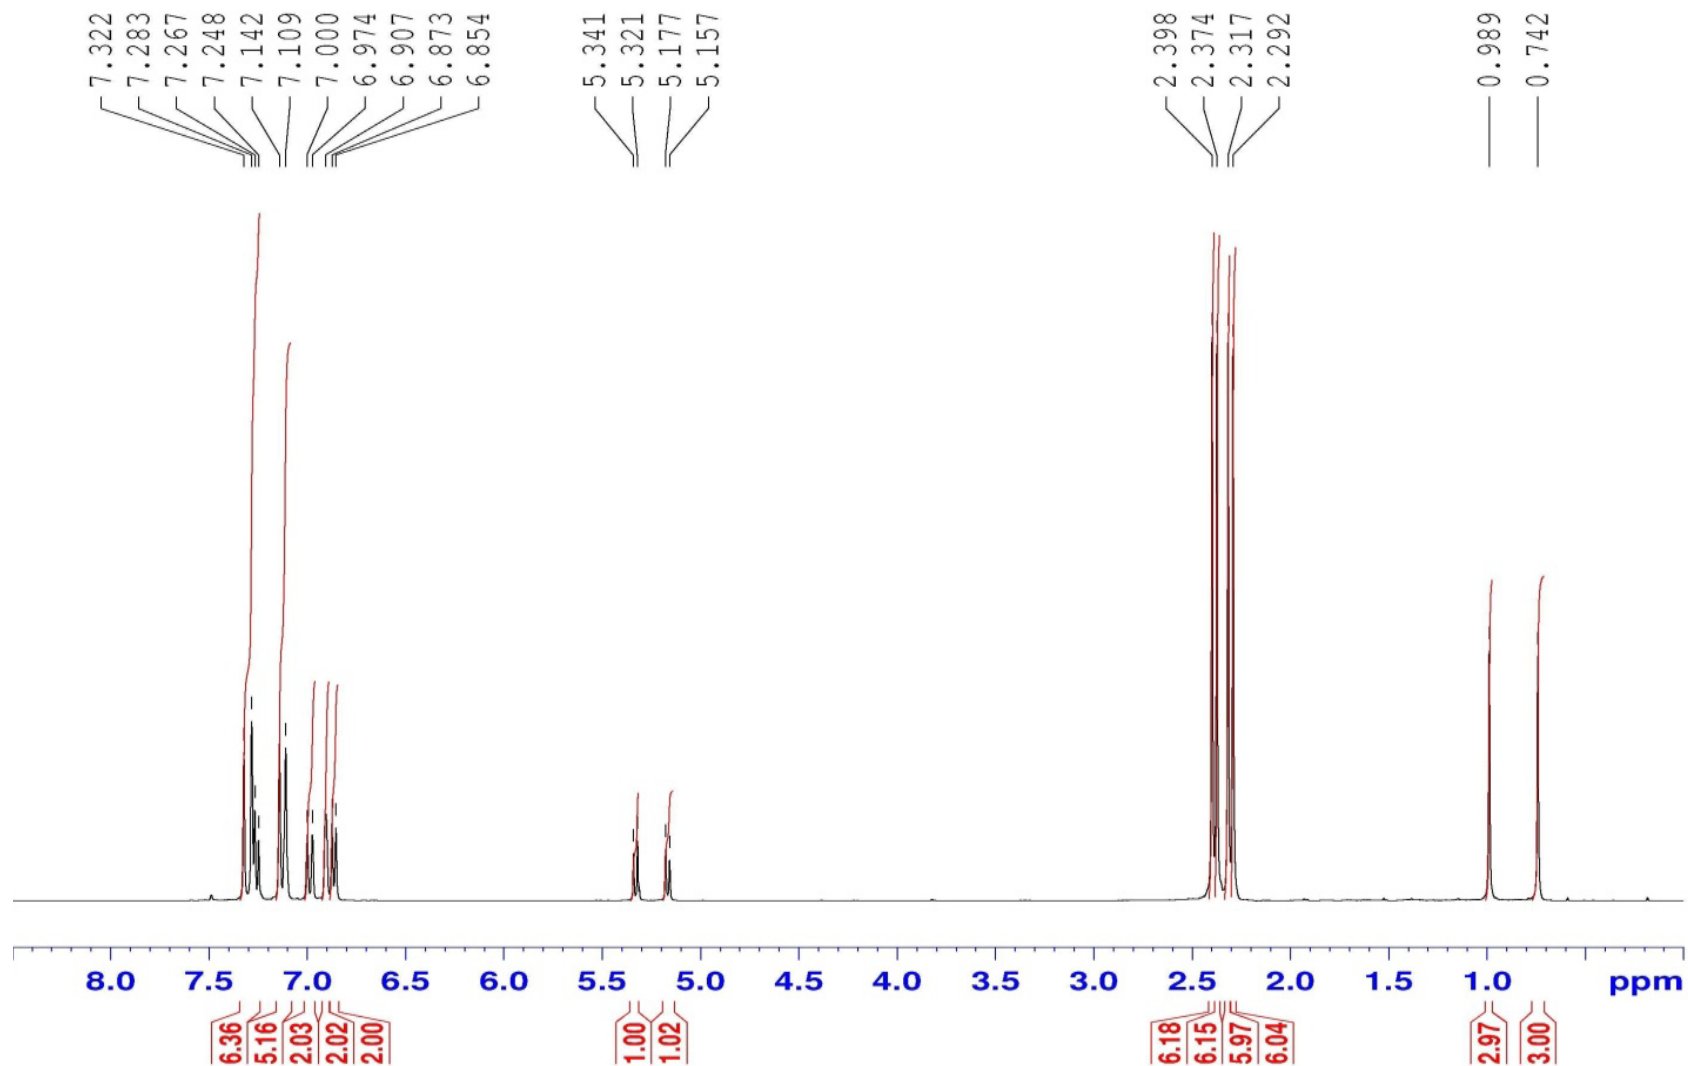

**$^{13}\text{C}$  NMR of (*R,R*)-6**

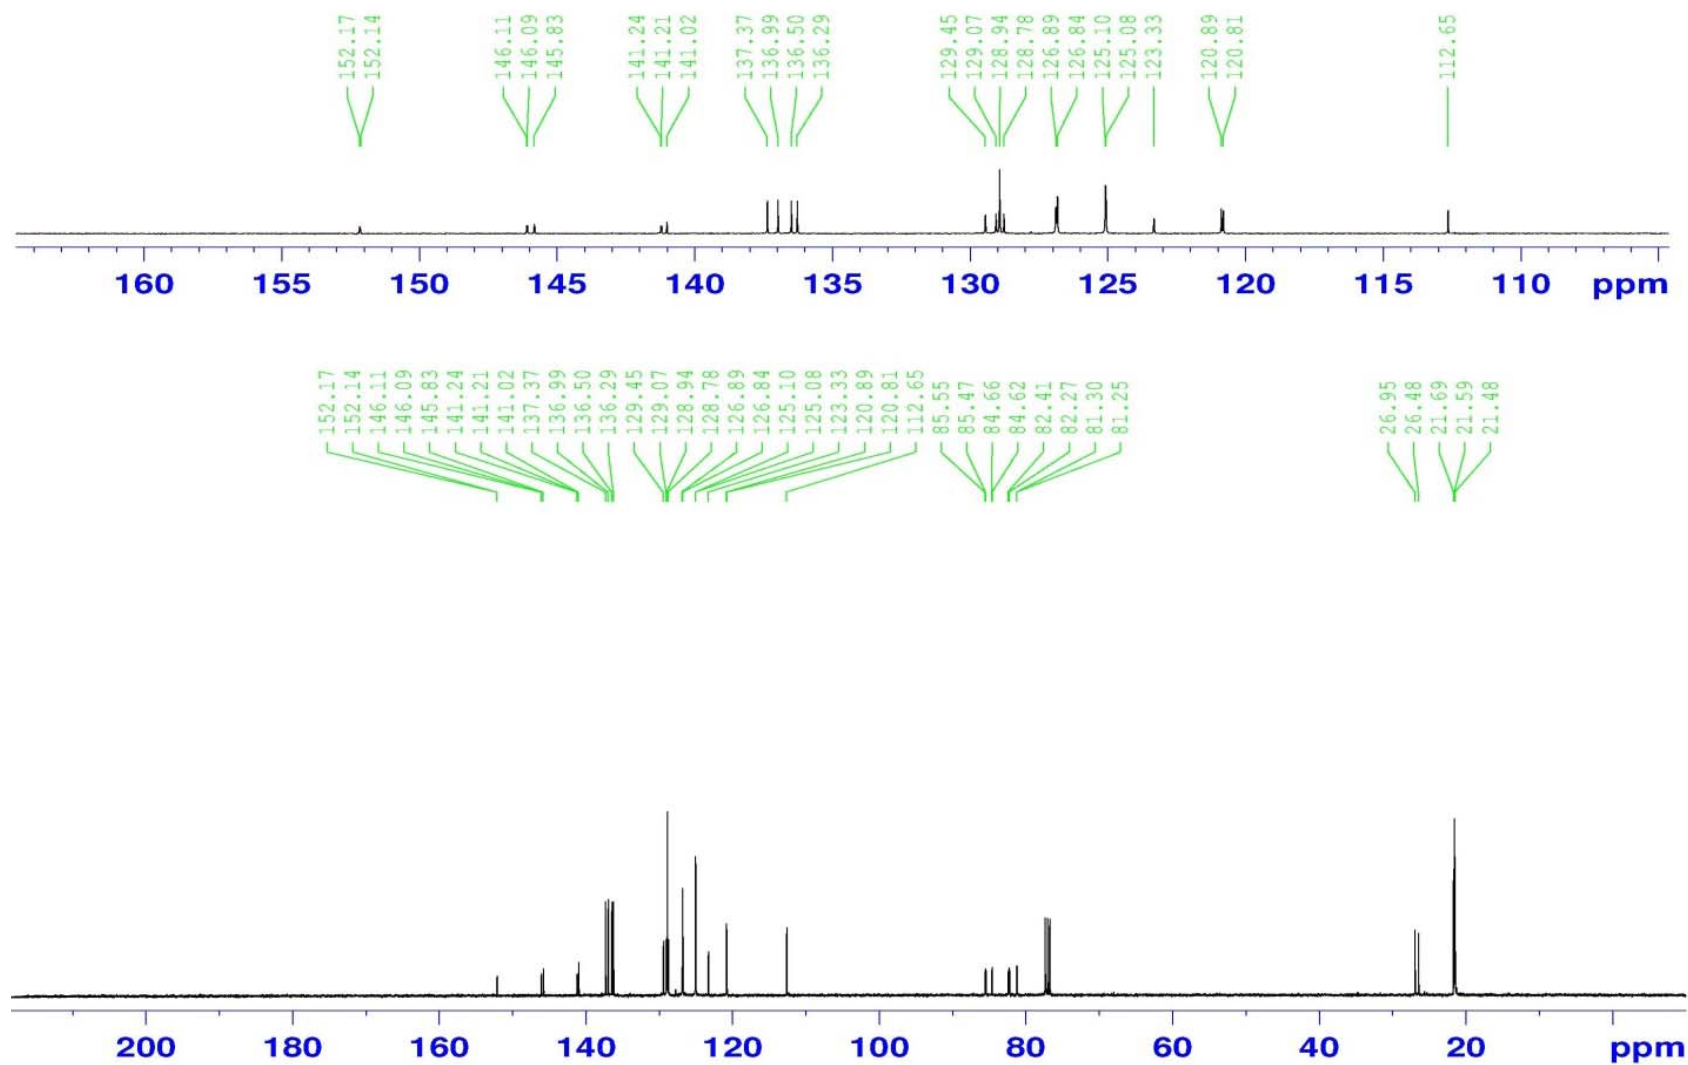

**$^{31}\text{P}$  NMR of (*R,R*)-6**

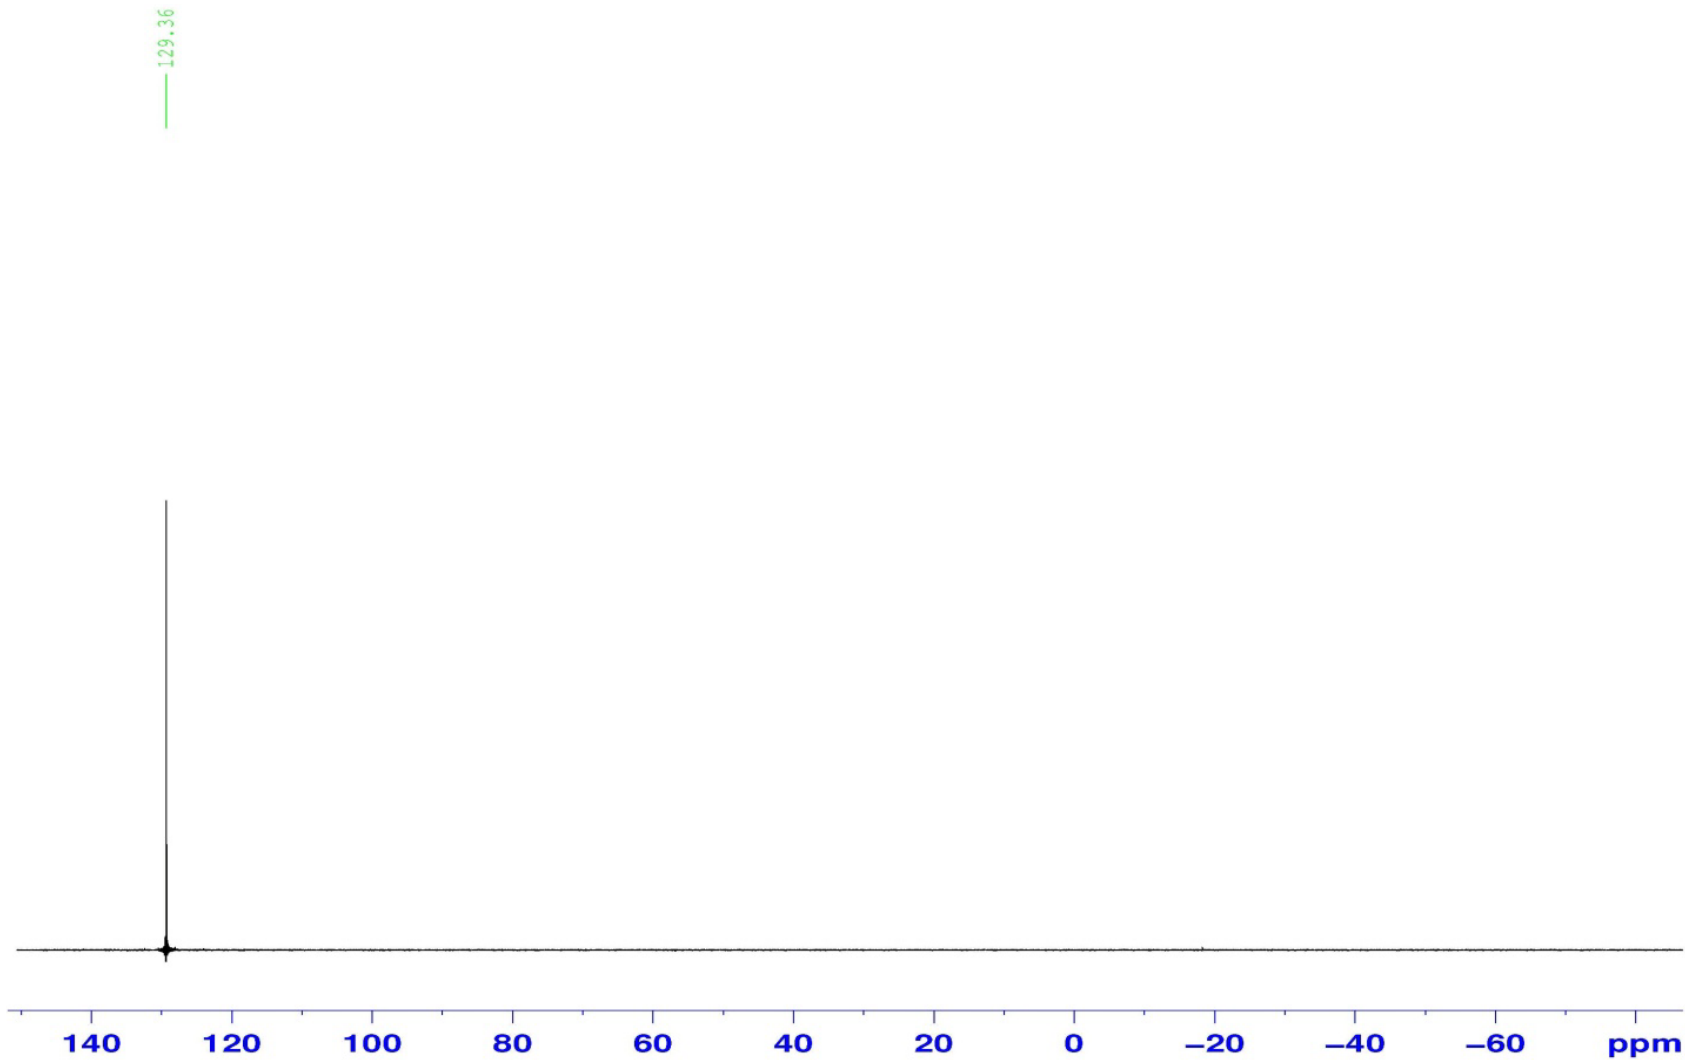

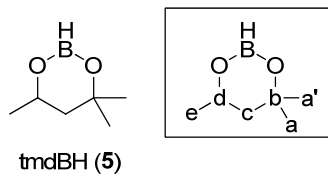

Following the procedure for the preparation of tmdBH affords, after bulb-to-bulb distillation, the title compound (75%) as a colorless liquid.

|                                                                         |                                                                                                                                                                                   |
|-------------------------------------------------------------------------|-----------------------------------------------------------------------------------------------------------------------------------------------------------------------------------|
| <b>b.p.</b>                                                             | 160–165 °C                                                                                                                                                                        |
| <b><sup>1</sup>H NMR (300 MHz, CDCl<sub>3</sub>)</b>                    | δ 4.30–4.15 (1H, m, d), 3.84 (1H, q, <i>J</i> = 155.6 Hz, BH), 1.90–1.75 (1H, m, c), 1.60–1.45 (1H, m, c), 1.31 (3H, s, a), 1.29 (3H, s, a'), 1.26 (3H, d, <i>J</i> = 6.2 Hz, e). |
| <b><sup>13</sup>C NMR (75 MHz, CDCl<sub>3</sub>)</b>                    | δ 70.99 (b), 64.73 (d), 46.17 (c), 31.02 (a), 28.14 (a'), 22.93 (e).                                                                                                              |
| <b><sup>11</sup>B NMR (193 MHz, THF with residual CDCl<sub>3</sub>)</b> | δ 24.96 (d, <i>J</i> = 169.1 Hz).                                                                                                                                                 |
| <b>IR (neat)</b>                                                        | 2976 (CH sp <sup>3</sup> stretch), 2879, 2400, 1495, 1427, 1384, 1291, 1156 (C-O stretch), 1094, 1024, 889, 789, 666 cm <sup>-1</sup> .                                           |
| <b>HRMS (FAB)</b>                                                       | Calcd. for C <sub>6</sub> H <sub>14</sub> BO <sub>2</sub> (M+H): 129.1087, found 129.1082 <i>m/z</i> .                                                                            |

**<sup>1</sup>H NMR of 5**

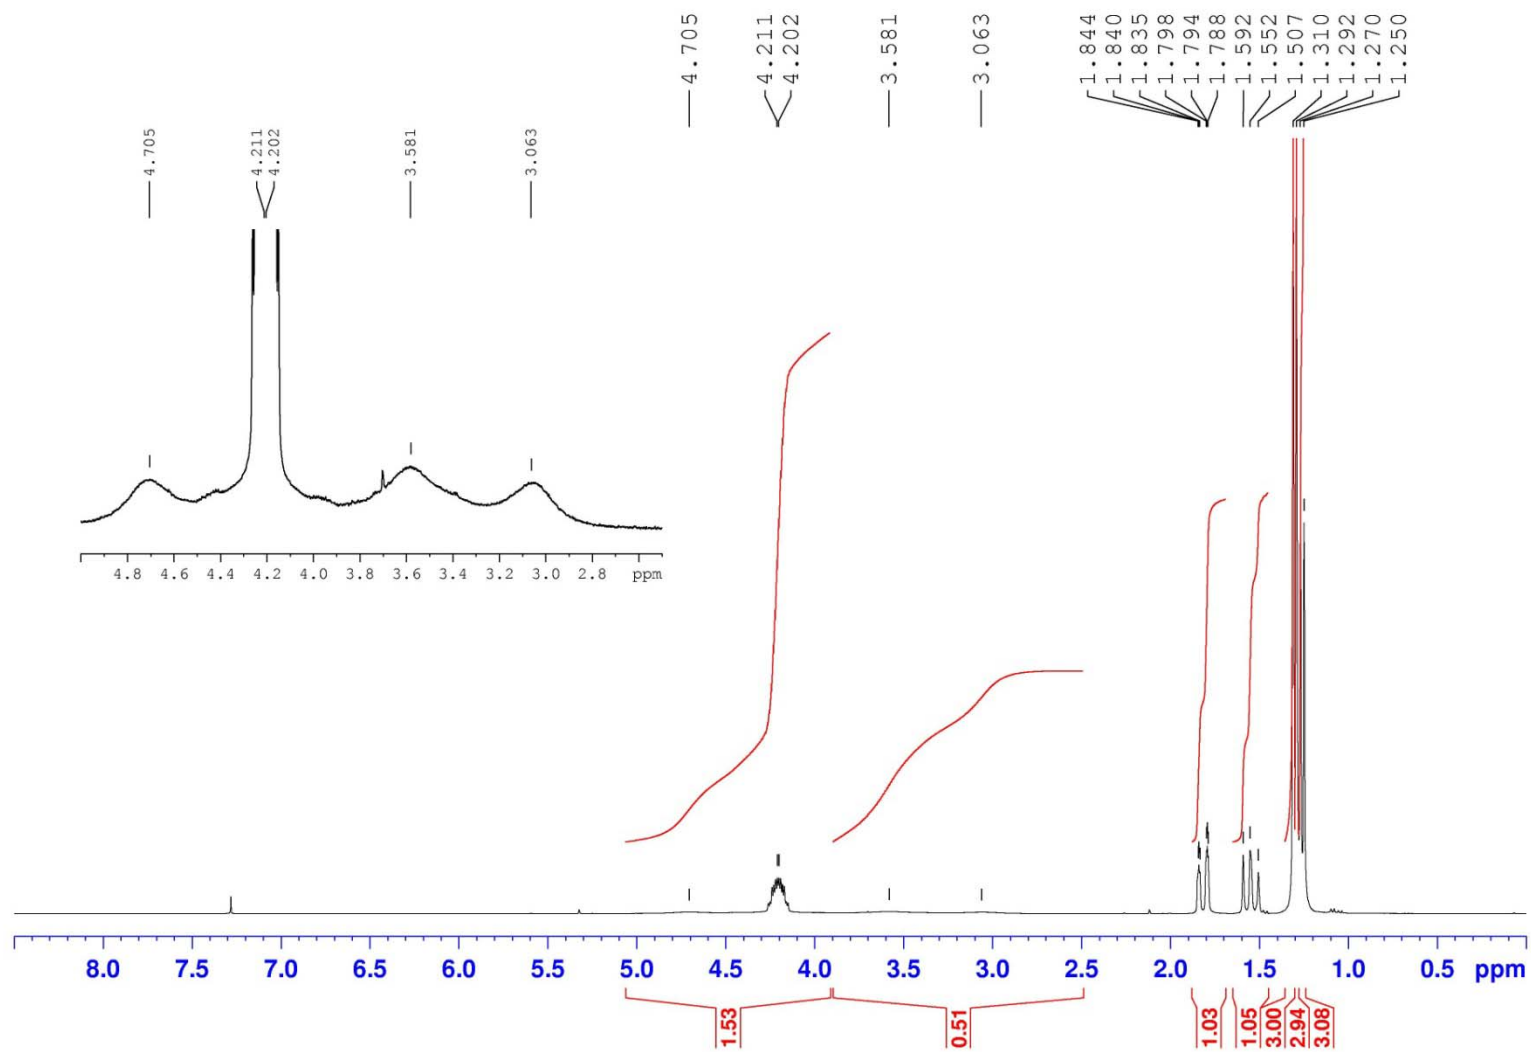

<sup>13</sup>C NMR of 5

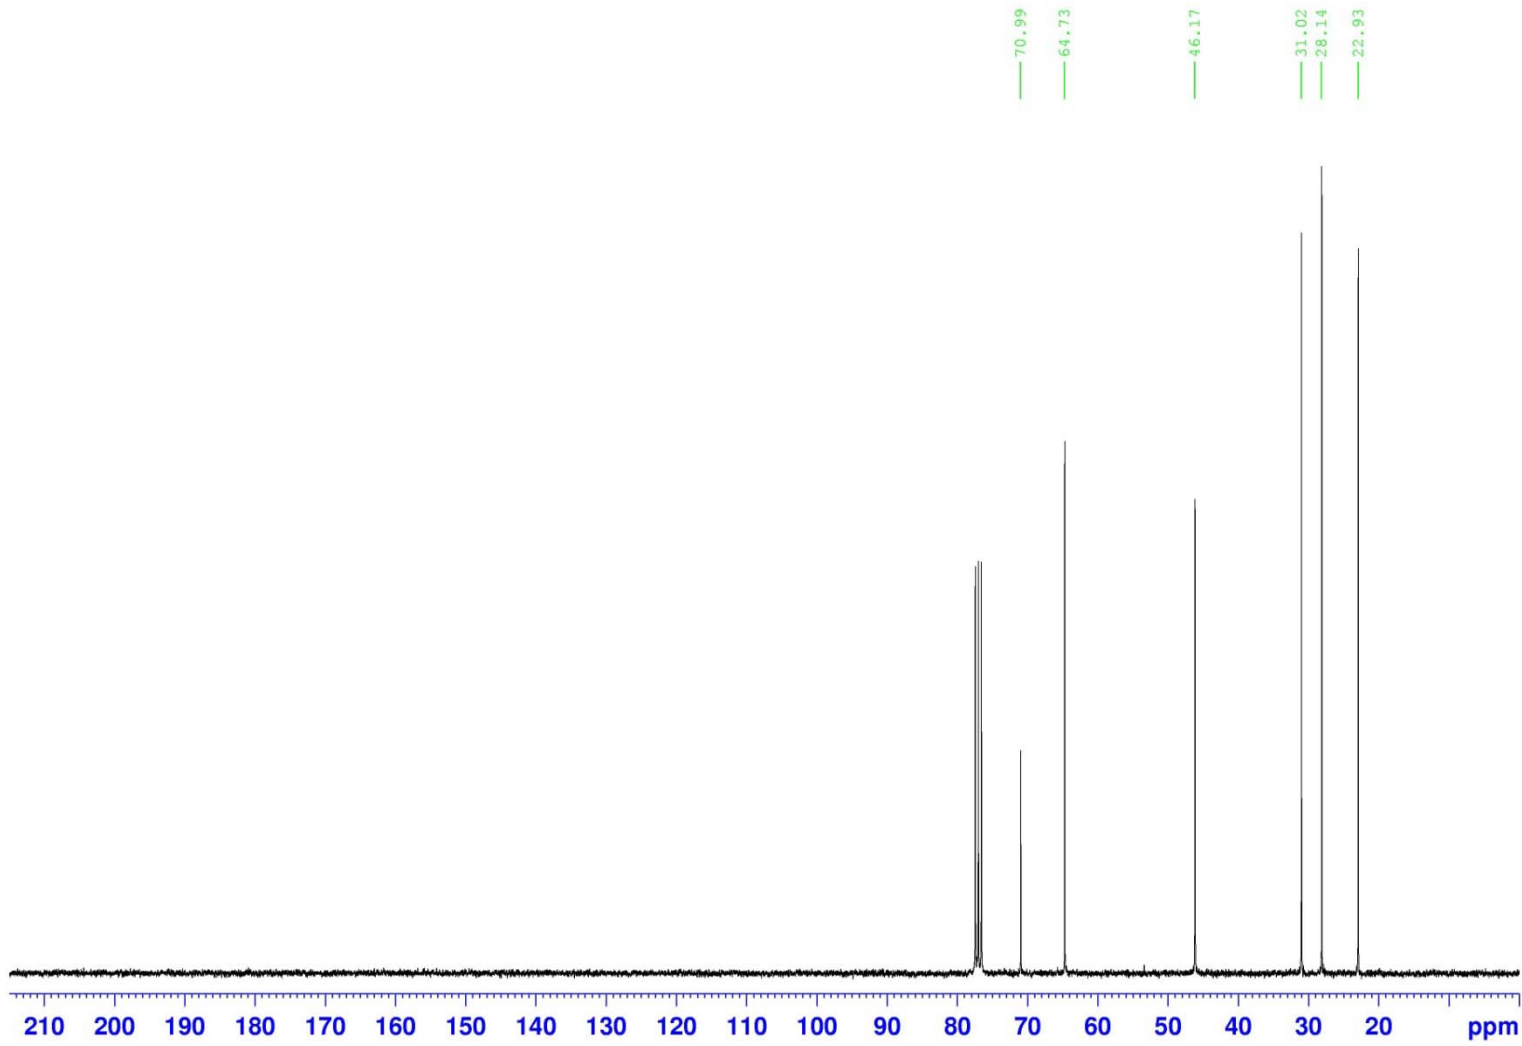

**$^{11}\text{B}$  NMR of 5**

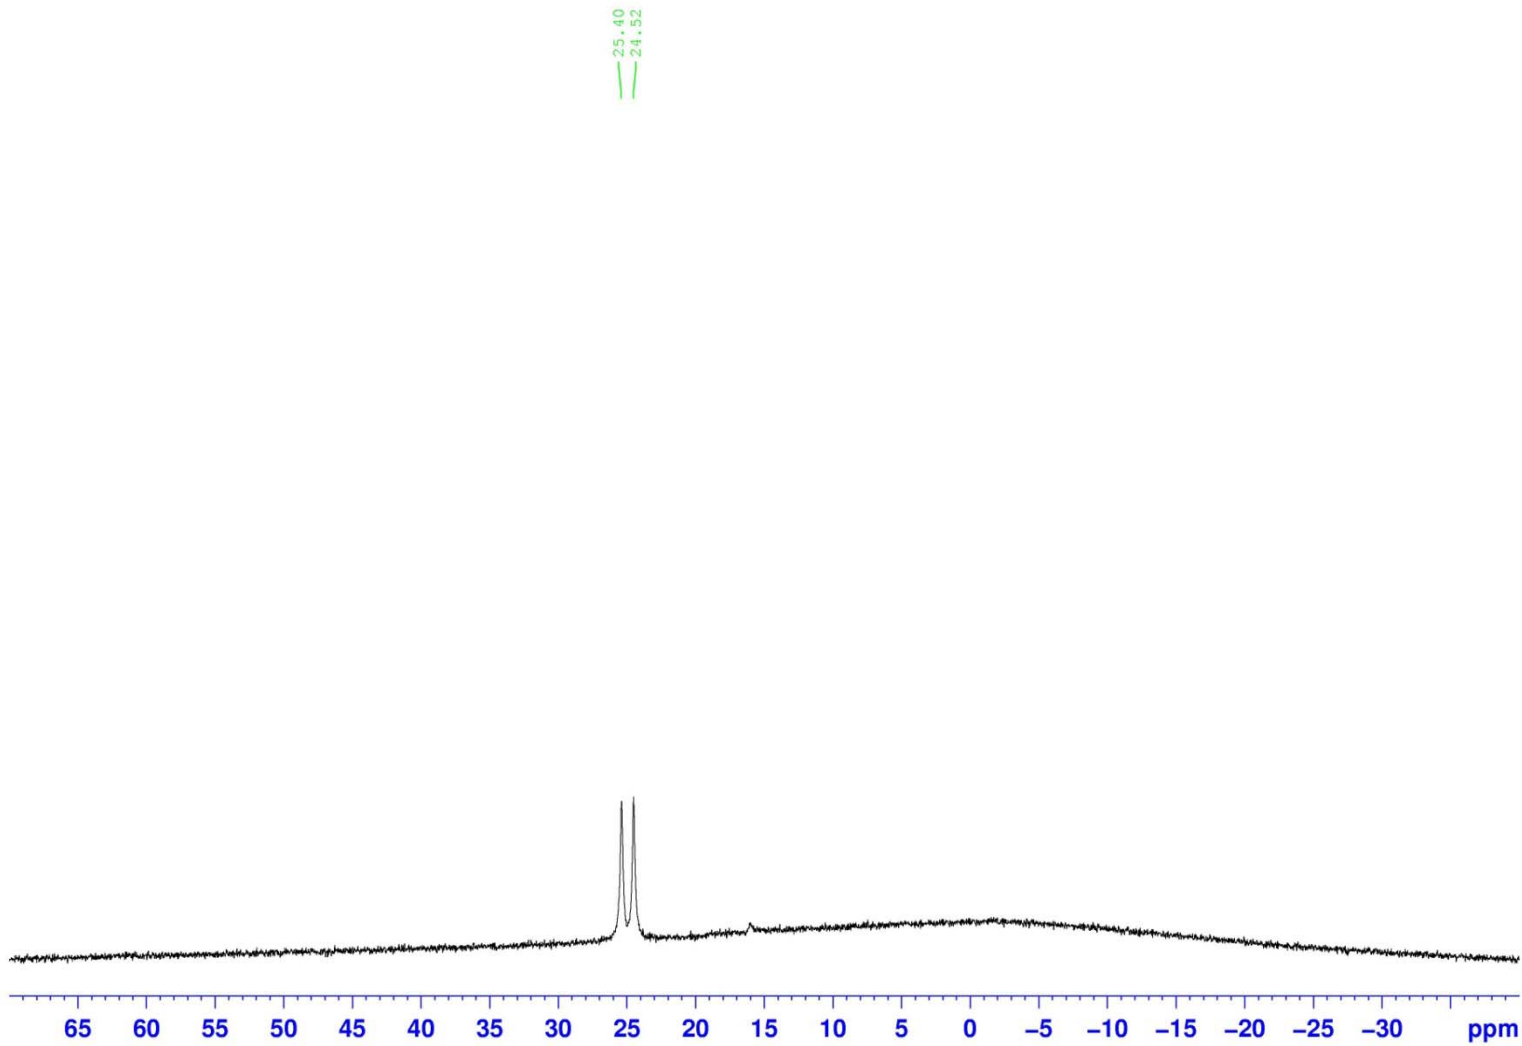

Supplement: c2cc36199j_2.pdf [file c2cc36199j_2.pdf]
